# Supplementary material for: Characterization of RNA in exosomes secreted by human breast cancer cell lines using next-generation sequencing
Source: PeerJ. 2013 Nov 5;1:e201. doi: 10.7717/peerj.201 (PMC3828613; doi:10.7717/peerj.201)
Supplement: Table S1 — (A) The Partek genomic suite output showing transcripts with RPKM >1 in at least one sample. The read counts from the transcript isoforms were estimated using EM algorithm from Partek genomic suite on RefGene and/or GENCODE v14 gene models. (B) Estimation of read coverage (in percentage) and read count of transcript. The transcripts with >90% coverage for protein-coding sequence and exonic sequence (in case of non-coding transcript) of transcript isoforms on RefGene and/or GENCODE v14 gene models are shown. [file peerj-01-201-s006.xlsx]

## Sheet: supplementary table
Supplemental Table 1. Two approaches of gene transcripts selection using RPKM or read coverage.
	A. The partek genomic suite output showing transcripts with RPKM >1 in at-least one sample. The read count from transcript isoforms were estimated using EM algorithm from Partek genomic suite on RefGene and/or GENCODE v14 gene models.
	B. Estimation of read coverage (in percentage) and read count of transcript. The transcripts with >90% coverage for protein-coding sequence and exonic sequence (in case of non-coding transcript) of transcript isoforms on RefGene and/or GENCODE v14 gene models are shown.

## Sheet: A
A. The partek genomic suite output showing transcripts with RPKM >1 in at-least one sample. The read count from transcript isoforms were estimated using EM algorithm from Partek genomic suite on RefGene and/or GENCODE v14 gene models.
symbol	acc	gene type	Read count (by EM algorithm)			RPKM
			MDA-MB-231 Cellular	MDA-MB-231 Exosomal	MDA-MB-436 Exosomal	MDA-MB-231 Cellular	MDA-MB-231 Exosomal	MDA-MB-436 Exosomal
7SK	ENST00000517018.1	nonCoding	2	0	0	3.41578	0	0
7SK	ENST00000516655.1	nonCoding	2	0	0	3.61745	0	0
7SK	ENST00000410146.1	nonCoding	9	0	0	15.4789	0	0
A1BG	NM_130786	coding	25	1	0	6.93892	7.55304	0
A1BG-AS1	NR_015380	nonCoding	6	0	1	1.38075	0	7.73003
A4GALT	NM_017436	coding	22	0	0	5.1547	0	0
AAAS	NM_015665	coding	27.9904	0	0	7.46865	0	0
AACS	NM_023928	coding	35	0	1	5.16585	0	4.95784
AADAT	NM_182662	coding	5.95209	0	0	1.38402	0	0
AAED1	NM_153698	coding	22	0	0	8.80297	0	0
AAGAB	NM_001271885	coding	3.80655	0.845786	0	0.605203	3.65931	0
AAGAB	NM_024666	coding	19.1225	0.138441	0	2.93003	0.57725	0
AAK1	NM_014911	coding	64	2	1	1.47522	1.25452	0.774276
AAMDC	NM_024684	coding	7	0	0	6.80785	0	0
AAMP	NM_001087	coding	97	2	4	26.5176	14.8786	36.7317
AAR2	NM_001271874	coding	136.257	1.98916	0.994578	26.8658	10.6728	6.58717
AARS	NM_001605	coding	194	2	2	28.4366	7.97767	9.84747
AARS2	NM_020745	coding	46	0	0	4.7151	0	0
AARSD1	NM_001261434	coding	32.9999	2	0	11.8588	19.5581	0
AASDH	NM_181806	coding	25	0	1	3.4412	0	4.62369
AASDHPPT	NM_015423	coding	78	1	0	13.3635	4.66224	0
AASS	NM_005763	coding	31	1	0	2.58817	2.27196	0
AATF	NM_012138	coding	44	7	1	10.0735	43.6108	7.69032
ABCA1	NM_005502	coding	131	0	1	6.11423	0	1.56779
ABCA11P	NR_002451	nonCoding	4.32051	0	0	1.11755	0	0
ABCA2	NM_212533	coding	19.758	0.512022	1.02404	1.18889	0.838411	2.06983
ABCA2	NM_001606	coding	55.2419	0.487978	0.975955	3.32078	0.798255	1.9707
ABCA3	NM_001089	coding	42	2	0	3.1084	4.02798	0
ABCA8	NM_007168	coding	0	1	0	0	2.33194	0
ABCB10	NM_012089	coding	35	0	0	4.44796	0	0
ABCB6	NM_005689	coding	9	0	0	1.46172	0	0
ABCB7	NM_001271698	coding	14.1004	0	0	2.82449	0	0
ABCB8	NM_007188	coding	23	0	0	2.40739	0	0
ABCB9	NM_001243013	coding	18.7081	2.12796e-07	0	2.74471	8.49569e-07	0
ABCB9	NM_001243014	coding	5.24005e-08	0.976472	0	1.05137e-08	5.33149	0
ABCC1	NM_004996	coding	40	1	2	2.98745	2.0324	5.01751
ABCC10	NM_001198934	coding	22.7287	1	0	2.21576	2.65288	0
ABCC10	NM_033450	coding	20.2713	0	0	1.95288	0	0
ABCC3	NM_003786	coding	39.9998	0	3.5131e-22	3.7953	0	1.11969e-21
ABCC3	NM_001144070	coding	0.00016559	0	1	4.30592e-05	0	8.73473
ABCC4	NM_005845	coding	58.8603	0	0	4.93775	0	0
ABCC9	NM_020297	coding	4	2	0	0.235543	3.20487	0
ABCD1	NM_000033	coding	25	1	0	3.34447	3.64047	0
ABCD3	NM_001122674	coding	4.71581	1	0	2.39041	13.7939	0
ABCD3	NM_002858	coding	60.2842	8.56455e-29	0	8.17179	3.15928e-28	0
ABCE1	NM_002940	coding	126.995	0.491235	0.491235	14.8423	1.56233	1.92851
ABCE1	NM_001040876	coding	28.0051	0.508765	0.508765	3.27538	1.61924	1.99876
ABCF1	NM_001090	coding	0.431568	5.02498	1.67499	0.0631461	20.0079	8.23245
ABCF1	NM_001025091	coding	130.568	0.975021	0.325007	18.4758	3.75447	1.54481
ABCF2	NM_005692	coding	40.7547	0	2.56639e-06	8.87846	0	1.87802e-05
ABCF2	NM_007189	coding	90.2454	1	2	12.4711	3.76055	9.28387
ABCF3	NM_018358	coding	80	0	0	15.2462	0	0
ABHD10	NM_018394	coding	45.8362	0	0	8.15807	0	0
ABHD11	NM_001145364	coding	0.086741	0.989637	0	0.0327561	10.1698	0
ABHD12	NM_001042472	coding	30.9318	3	0.000111399	7.14163	18.8488	0.000863957
ABHD12	NM_015600	coding	3.06823	0	2.99989	0.872353	0	28.6503
ABHD13	NM_032859	coding	16	0	0	1.47919	0	0
ABHD14A	NM_015407	coding	16.6986	0	0	7.38724	0	0
ABHD14B	NM_001254753	coding	18.8813	0	0	4.61825	0	0
ABHD14B	NM_001146314	coding	6.1154	0	0	1.3364	0	0
ABHD14B	NM_032750	coding	31.0033	0	0	6.23583	0	0
ABHD15	NM_198147	coding	23	0	0	3.3603	0	0
ABHD16A	NM_021160	coding	20.0654	0.0855417	0	4.87139	0.565137	0
ABHD16A	NM_001177515	coding	6.28114	0.00430528	0	1.43467	0.0267599	0
ABHD17A	NM_001130111	coding	57.9197	0	0	18.1639	0	0
ABHD17B	NM_001025780	coding	15	0	0	2.36871	0	0
ABHD17C	NM_021214	coding	42	0	0	8.72328	0	0
ABHD2	NM_152924	coding	63.8102	0	2.69621	3.58071	0	5.0822
ABHD4	NM_022060	coding	132	3	1	25.7879	15.949	6.56236
ABHD5	NM_016006	coding	39	2	0	3.57116	4.98362	0
ABHD6	NM_020676	coding	18	0	0	3.68699	0	0
ABHD8	NM_024527	coding	54	0	0	12.6646	0	0
ABI1	NM_001178120	coding	0.00941119	0.470748	0	0.00129798	1.76678	0
ABI1	NM_001178121	coding	16.1714	0.579155	0	2.23981	2.18286	0
ABI1	NM_001012751	coding	0.00774643	0.451682	0	0.00106748	1.6938	0
ABI1	NM_001012752	coding	46.4709	0.169192	0	6.27677	0.621879	0
ABI2	NM_005759	coding	87	2	2	6.58092	4.11687	5.08178
ABL1	NM_005157	coding	64.4977	1.97296	1.97296	5.86758	4.88432	6.0291
ABL1	NM_007313	coding	71.5023	0.0270373	0.0270373	5.95952	0.0613231	0.0756959
ABL2	NM_001136000	coding	33.4084	0.575556	0	1.40793	0.660059	0
ABL2	NM_001168236	coding	30.0338	0.0640588	0	1.21025	0.0702449	0
ABL2	NM_001168239	coding	136.055	0.751047	0	5.76498	0.866007	0
ABL2	NM_007314	coding	45.1845	0.0497333	0	1.81139	0.054255	0
ABL2	NM_005158	coding	235.139	0.159261	0	9.653	0.177918	0
ABLIM1	NM_006720	coding	89.6741	2.95648	0.985492	6.42712	5.76626	2.37258
ABLIM1	NM_002313	coding	17.8386	0.0183985	0.00613284	1.15263	0.0323506	0.013311
ABLIM3	NM_014945	coding	49	2	0	5.5405	6.15394	0
ABR	NM_001256847	coding	0.000127252	1.44488	0	1.73648e-05	5.36547	0
ABR	NM_001092	coding	159.185	2.26762	0	15.4112	5.97412	0
ABR	NM_021962	coding	24.3144	0.271833	0	2.25422	0.685811	0
ABRACL	NM_021243	coding	11	1	1	6.38085	15.7854	19.4852
ABT1	NM_013375	coding	78	2	0	16.8948	11.7885	0
ABTB1	NM_032548	coding	8.05333	0.366061	0	1.98664	2.45735	0
ABTB1	NM_172027	coding	10.5709	0.480494	0	2.62221	3.2435	0
ABTB2	NM_145804	coding	18	0	1	1.7995	0	3.35814
AC002480.4	ENST00000439823.1	nonCoding	1	1	0	0.880009	23.9473	0
AC004463.6	ENST00000565162.1	nonCoding	3	0	0	1.0226	0	0
AC004790.3	ENST00000592886.1	nonCoding	0	1	0	0	22.9977	0
AC005150.1	ENST00000512831.1	nonCoding	0	0	1	0	0	26.2181
AC005256.1	ENST00000592934.1	nonCoding	1	0	0	1.18112	0	0
AC005329.7	ENST00000501448.1	nonCoding	5	1	0	0.686313	3.73528	0
AC005519.4	ENST00000554532.1	nonCoding	4	1	0	1.43533	9.76476	0
AC005609.1	ENST00000502505.1	coding	0	0	1	0	0	5.70907
AC005682.5	ENST00000415611.2	nonCoding	4	0	0	1.92033	0	0
AC005786.5	ENST00000592368.1	nonCoding	1	0	0	1.32836	0	0
AC005789.9	ENST00000585411.1	nonCoding	1	0	0	1.65039	0	0
AC005943.5	ENST00000588960.1	nonCoding	5	0	0	1.30363	0	0
AC005971.3	ENST00000431149.1	nonCoding	2	0	0	1.40248	0	0
AC006273.5	ENST00000586061.1	nonCoding	3	0	0	1.77382	0	0
AC006538.1	ENST00000567905.1	nonCoding	4	0	0	1.23701	0	0
AC007952.6	ENST00000436381.1	coding	0	0.164591	0	0	3.97722	0
AC007952.6	ENST00000399087.1	coding	0	0.835409	0	0	20.8675	0
AC008280.5	ENST00000458030.3	nonCoding	3	0	0	1.10564	0	0
AC009005.2	ENST00000590292.1	nonCoding	2.99976	0	0	2.88876	0	0
AC009120.4	ENST00000562888.1	nonCoding	2	0	0	2.33969	0	0
AC009237.1	ENST00000442128.1	coding	13	0	0	1.79953	0	0
AC009784.3	ENST00000445293.1	nonCoding	0	2	0	0	30.5233	0
AC009961.3	ENST00000453016.1	nonCoding	1	0	0	1.22236	0	0
AC010883.5	ENST00000423354.1	nonCoding	1	0	0	1.23157	0	0
AC012146.7	ENST00000413077.1	nonCoding	4	0	2	4.13641	0	69.4725
AC016757.1	ENST00000408994.2	coding	8	0	0	1.77195	0	0
AC017002.2	ENST00000432268.1	nonCoding	2	0	0	1.11275	0	0
AC022182.1	ENST00000527672.1	nonCoding	2	0	0	1.05867	0	0
AC023137.2	ENST00000448241.1	nonCoding	1	0	0	1.59145	0	0
AC051642.1	ENST00000399967.3	coding	24	0	0	4.17458	0	0
AC073934.6	ENST00000490314.1	nonCoding	0	1	0	0	26.9468	0
AC074138.3	ENST00000425254.2	nonCoding	2	0	0	1.20286	0	0
AC074212.6	ENST00000586251.1	nonCoding	1	0	0	1.01483	0	0
AC083843.2	ENST00000521444.1	nonCoding	0	0	1	0	0	19.3934
AC091133.1	ENST00000435491.1	nonCoding	1	0	0	1.01483	0	0
AC091729.9	ENST00000413706.1	nonCoding	2	0	0	1.4545	0	0
AC092159.2	ENST00000445418.1	nonCoding	0	0	1	0	0	8.47399
AC092168.2	ENST00000430586.1	nonCoding	6	0	0	4.1018	0	0
AC092295.7	ENST00000494214.2	nonCoding	1.99501	0	0	1.64627	0	0
AC092295.7	ENST00000448373.2	nonCoding	2.98875	0	0	1.45914	0	0
AC092574.2	ENST00000516341.1	nonCoding	1	0	0	4.49693	0	0
AC092669.2	ENST00000437790.1	nonCoding	0	0.999999	0	0	17.2334	0
AC093415.2	ENST00000420870.1	nonCoding	2	0	0	1.68732	0	0
AC098617.2	ENST00000424116.1	nonCoding	1	0	0	1.00857	0	0
AC104135.2	ENST00000418001.1	nonCoding	0	1	0	0	17.4819	0
AC106786.1	ENST00000458103.2	nonCoding	1	1	7	0.917912	24.9788	215.833
AC108463.3	ENST00000371162.4	coding	13	0	0	3.11749	0	0
AC108488.4	ENST00000438482.1	nonCoding	3	0	0	1.60886	0	0
AC112721.1	ENST00000409162.1	coding	2	0	0	1.66723	0	0
AC113189.5	ENST00000573187.1	nonCoding	3	0	0	2.16568	0	0
AC124789.1	ENST00000582919.1	nonCoding	3	0	0	3.50954	0	0
AC124789.1	ENST00000582968.1	nonCoding	1.57623e-27	1	0	1.60293e-27	27.6736	0
AC127496.1	ENST00000321930.4	coding	4	0	0	1.09047	0	0
AC133528.2	ENST00000433036.1	nonCoding	3	0	0	3.54336	0	0
AC145343.2	ENST00000579629.1	nonCoding	2	0	0	1.5082	0	0
ACAA1	NM_001607	coding	2.28245	2	0	0.615052	14.6659	0
ACAA1	NM_001130410	coding	6.15173	1.96343e-12	0	1.95803	1.70062e-11	0
ACAA2	NM_006111	coding	12	0	1	3.04136	0	8.51343
ACACA	NM_198836	coding	182.521	0.893925	0.451113	9.36225	1.24778	0.777266
ACAD10	NM_025247	coding	13.5796	0.75442	0	1.65825	2.50696	0
ACAD11	NM_032169	coding	7.29837	0	0	1.00602	0	0
ACAD8	NM_014384	coding	24	0	0	5.34483	0	0
ACAD9	NM_014049	coding	14.0632	0	2.8869	2.677	0	18.4593
ACADM	NM_001127328	coding	8.00387	0	0	1.50027	0	0
ACADM	NM_000016	coding	32.9961	0	0	6.21343	0	0
ACADS	NM_000017	coding	22	0	0	5.62526	0	0
ACADSB	NM_001609	coding	20	0	0	1.65011	0	0
ACADVL	NM_001270447	coding	96.3481	5.8252e-06	1.53706	21.1968	3.48745e-05	11.3589
ACADVL	NM_000018	coding	177.024	3.31552	0.383724	37.8583	19.2952	2.75654
ACADVL	NM_001033859	coding	4.93167	6.07654e-06	1.06174e-15	1.08595	3.64119e-05	7.85332e-15
ACADVL	NM_001270448	coding	26.6964	0.684468	0.0792173	5.52836	3.85716	0.55104
ACAP1	NM_014716	coding	6	0	0	1.17264	0	0
ACAP2	NM_012287	coding	93	0	0	6.35779	0	0
ACAP3	NM_030649	coding	28	0	0	3.65114	0	0
ACAT1	NM_000019	coding	92	5	0	21.1318	31.2527	0
ACAT2	NM_005891	coding	42	0	1	13.2733	0	10.6157
ACBD3	NM_022735	coding	124	1	1	17.0492	3.74156	4.61851
ACBD4	NM_001135705	coding	10.6106	0	0	2.78572	0	0
ACBD4	NM_001135706	coding	3.95328	0	0	1.0172	0	0
ACBD5	NM_001042473	coding	25.0469	0	0	3.1806	0	0
ACBD5	NM_001271512	coding	45.1782	0	0	5.3054	0	0
ACBD5	NM_145698	coding	12.7874	0	0	1.57288	0	0
ACBD6	NM_032360	coding	43	1	0	13.0428	8.25413	0
ACBD7	NM_001039844	coding	12	0	0	1.74539	0	0
ACCS	NM_001127219	coding	3.99694	0	0	1.04377	0	0
ACD	NM_022914	coding	5.53277	0	0	1.31841	0	0
ACD	NM_001082486	coding	4.46723	0	0	1.05986	0	0
ACER3	NM_018367	coding	19	0	0	2.12289	0	0
ACHE	NM_000665	coding	0	0	0.999999	0	0	7.47049
ACIN1	NM_014977	coding	29.2644	2.13963e-15	3.20945e-15	2.90548	5.78081e-15	1.07036e-14
ACIN1	NM_001164816	coding	10.8192	1.5447	2.31704	2.15928	8.38932	15.5334
ACIN1	NM_001164817	coding	3.189	0.455305	0.682957	0.620784	2.4119	4.46579
ACIN1	NM_001164815	coding	122.64	7.14459e-15	1.07169e-14	12.4796	1.97839e-14	3.66313e-14
ACLY	NM_001096	coding	475.522	20.5947	0.416085	53.5457	63.1072	1.57382
ACLY	NM_198830	coding	39.4777	1.40531	0.583915	4.47619	4.33611	2.22395
ACN9	NM_020186	coding	8	0	0	1.90633	0	0
ACO1	NM_002197	coding	259	5	1	35.7815	18.7974	4.64063
ACO2	NM_001098	coding	50	2	2	8.94135	9.7327	12.0138
ACOT13	NM_018473	coding	18.4127	0	0	2.19914	0	0
ACOT7	NM_181866	coding	54.8708	1.26801	1.26801	19.021	11.9615	14.765
ACOT7	NM_007274	coding	3.86804	8.08648e-06	8.08648e-06	1.0504	5.97578e-05	7.37638e-05
ACOT7	NM_181864	coding	11.343	0.001391	0.001391	3.42149	0.0114179	0.014094
ACOT7	NM_181865	coding	0.918247	0.730595	0.730595	0.31475	6.8148	8.41204
ACOT8	NM_005469	coding	67	0	0	28.0453	0	0
ACOT9	NM_001037171	coding	75.0972	0	1	21.3144	0	9.53386
ACOT9	NM_001033583	coding	5.90282	0	0	1.70197	0	0
ACOX1	NM_004035	coding	46.781	0	0.858714	3.02352	0	1.86428
ACOX1	NM_007292	coding	55.1156	0	0.858714	3.5622	0	1.86428
ACOXL	NM_001142807	coding	5	0	0	1.0328	0	0
ACP1	NM_001040649	coding	2.42153e-23	2	0	1.80387e-23	40.5431	0
ACP1	NM_007099	coding	0.0360893	5.93177e-34	0.712534	0.0114054	5.10135e-33	7.56406
ACP1	NM_004300	coding	41.1273	1.13271e-18	0	12.9975	9.74139e-18	0
ACP2	NM_001610	coding	14	0	0	3.11498	0	0
ACP6	NM_016361	coding	17	1	0	4.60885	7.37758	0
ACPL2	NM_001037172	coding	6.58191	0	0	1.0729	0	0
ACSF2	NM_025149	coding	56	0	0	12.2596	0	0
ACSF3	NM_001127214	coding	8.09399	0	4.17655e-05	1.13516	0	0.000196757
ACSL1	NM_001995	coding	76	2	0	9.79042	7.01113	0
ACSL3	NM_004457	coding	21.7001	0	0	2.43904	0	0
ACSL3	NM_203372	coding	73.2998	0	0	8.44593	0	0
ACSL4	NM_022977	coding	65.8186	2	0.0496037	6.04723	5.00044	0.153088
ACSL4	NM_004458	coding	252.182	1.64719e-14	0.950396	24.609	4.37413e-14	3.11532
ACSL5	NM_016234	coding	82.6694	2	0	12.0816	7.95389	0
ACSL5	NM_203380	coding	7.15868	3.94842e-16	0	1.03784	1.55773e-15	0
ACSM5	NM_017888	coding	0	1	0	0	5.51413	0
ACSS1	NM_001252677	coding	0.203567	1	0	0.0409276	5.47115	0
ACSS2	NM_001076552	coding	19.8047	3.08776	0.055307	3.21656	13.647	0.301732
ACSS2	NM_001242393	coding	56.3298	0.0719802	0.840084	9.67107	0.336294	4.84482
ACSS2	NM_018677	coding	82.8656	5.84026	0.104609	13.6347	26.1501	0.578174
ACSS3	NM_024560	coding	15	0	0	2.42416	0	0
ACTA1	NM_001100	coding	0	1	0	0	8.94013	0
ACTA2	NM_001141945	coding	3.96814	0	0	1.1064	0	0
ACTB	NM_001101	coding	785	133	27	212.351	979.052	245.339
ACTBL2	NM_001017992	coding	0	2	0	0	9.54808	0
ACTG1	NM_001614	coding	1144.85	24.1076	0.192604	282.561	161.915	1.59678
ACTG1	NM_001199954	coding	33.8709	1.39246	0.0111249	7.88709	8.82353	0.0870168
ACTL10	NM_001024675	coding	0	0	1	0	0	8.11882
ACTL6A	NM_178042	coding	0.0175961	0.445469	0	0.00452519	3.1175	0
ACTL6A	NM_004301	coding	78.6875	1.55453	0	20.7588	11.1601	0
ACTN1	NM_001130005	coding	14.4136	0.20266	1.84532	1.90433	0.728629	8.18951
ACTN1	NM_001130004	coding	30.2213	0.0703323	0.640408	3.90752	0.247465	2.7814
ACTN1	NM_001102	coding	719.367	14.727	1.51428	94.66	52.7352	6.69329
ACTN2	NM_001103	coding	0	0	2	0	0	7.27251
ACTN4	NM_004924	coding	809	31	4	100.289	104.577	16.6565
ACTR10	NM_018477	coding	49	0	0	9.83945	0	0
ACTR1A	NM_005736	coding	191	2	0	32.5867	9.28553	0
ACTR1B	NM_005735	coding	230	2	0	49.9282	11.8146	0
ACTR2	NM_001005386	coding	13.0162	1.36012	0.453374	1.62054	4.60813	1.89606
ACTR2	NM_005722	coding	160.984	1.63988	0.546626	20.1195	5.5772	2.29479
ACTR3	NM_005721	coding	201.195	0.138187	0.276373	17.3016	0.323373	0.79833
ACTR3	NM_001277140	coding	13.626	0.861813	1.72363	1.21636	2.09351	5.16836
ACTR5	NM_024855	coding	33	2	6	6.52499	10.7613	39.8507
ACTR8	NM_022899	coding	54	4	0	7.29573	14.7064	0
ACVR1	NM_001111067	coding	14.2905	0	0	2.44578	0	0
ACVR1B	NM_020327	coding	9.39991	0	0	1.02026	0	0
ACVR2A	NM_001616	coding	3	4	0	0.280415	10.1744	0
ACVR2B	NM_001106	coding	49	4	0	2.11185	4.69135	0
ACVRL1	NM_001077401	coding	0.832098	0.832098	0	0.0988525	2.69003	0
ACY1	NM_000666	coding	51.718	0	0	15.1075	0	0
ACY3	NM_080658	coding	0	2	0	0	20.521	0
ACYP1	NM_001107	coding	14	0	0	11.3053	0	0
ADA	NM_000022	coding	6	0	0	1.91971	0	0
ADAM10	NM_001110	coding	208	3	0	25.9624	10.19	0
ADAM15	NM_207191	coding	14.4315	0.000123685	2.4737e-05	2.55927	0.000596887	0.000147357
ADAM15	NM_001261464	coding	85.8651	2.16772e-05	4.33544e-06	14.6956	0.000100959	2.49242e-05
ADAM15	NM_003815	coding	83.2313	3.63152e-05	7.26305e-06	14.3956	0.000170923	4.21969e-05
ADAM15	NM_001261466	coding	5.52214	4.99975	0.999951	1.21598	29.9596	7.3963
ADAM17	NM_003183	coding	16	0	0	2.20733	0	0
ADAM19	NM_033274	coding	102	1	0	7.71437	2.05812	0
ADAM22	NM_021721	coding	1.73357	0	0.866787	0.306543	0	5.14849
ADAM8	NM_001164489	coding	37.1953	0.308818	0	5.81744	1.31436	0
ADAM8	NM_001109	coding	171.4	0.0242617	0	25.4511	0.0980367	0
ADAM8	NM_001164490	coding	12.4052	1.66692	0	2.00812	7.34297	0
ADAM9	NM_003816	coding	294.614	0.0994924	0	35.239	0.32384	0
ADAMTS1	NM_006988	coding	69	0	0	7.27185	0	0
ADAMTS12	NM_030955	coding	109	0	0	10.7848	0	0
ADAMTS15	NM_139055	coding	54	1	0	4.6633	2.35001	0
ADAMTS16	NM_139056	coding	30	0	0	2.95636	0	0
ADAMTS19	NM_133638	coding	9	2	11	0.866867	5.24216	35.5894
ADAMTS6	NM_197941	coding	40	0	0	2.69766	0	0
ADAMTS9	NM_182920	coding	15	0	0	1.00554	0	0
ADAMTSL1	NM_001040272	coding	75.9534	0	0	4.74748	0	0
ADAMTSL4	NM_019032	coding	37.9358	0	0	4.42628	0	0
ADAMTSL5	NM_213604	coding	13	0	0	2.23036	0	0
ADAP1	NM_006869	coding	23	5	10	4.85521	28.7224	70.9086
ADAP2	NM_018404	coding	9	0	0	1.60476	0	0
ADAR	NM_001193495	coding	44.0414	0.680317	1.46842e-16	3.2177	1.35259	3.60373e-16
ADAR	NM_001025107	coding	265.378	2.37484	5.12592e-16	19.8898	4.84361	1.29049e-15
ADAR	NM_001111	coding	150.92	0.898644	0.363467	11.0891	1.79684	0.897087
ADAR	NM_015841	coding	4.09668	2.44711	0.989762	0.307229	4.99406	2.49333
ADAR	NM_015840	coding	21.5645	1.59909	0.646771	1.60324	3.23521	1.61521
ADAT1	NM_012091	coding	6.20053	1.3779	0	0.857344	5.18457	0
ADC	NM_052998	coding	14	1	0	3.14496	6.11305	0
ADCK2	NM_052853	coding	56	0	0	11.6114	0	0
ADCK3	NM_020247	coding	82	1	1	13.7461	4.56179	5.63097
ADCK4	NM_024876	coding	6.6615	0	0	1.33657	0	0
ADCK4	NM_001142555	coding	14.3385	0	0	3.3871	0	0
ADCK5	NM_174922	coding	9	0	0	2.24961	0	0
ADCY3	NM_004036	coding	67	0	0	7.47067	0	0
ADCY6	NM_020983	coding	41.8171	0	0	3.48771	0	0
ADCY7	NM_001114	coding	46	0	0	3.67344	0	0
ADCY9	NM_001116	coding	58	1	3	3.67925	1.72624	6.39251
ADD1	NM_014189	coding	19.0736	0.438502	0.242475	2.31016	1.44528	0.986493
ADD1	NM_176801	coding	14.8832	0.291029	0	1.78761	0.951222	0
ADD1	NM_001119	coding	33.2632	1.36994	0.757525	4.12353	4.62145	3.15443
ADD1	NM_014190	coding	25.78	0.900526	0	3.16862	3.01199	0
ADD3	NM_001121	coding	49.8819	0	0	5.62335	0	0
ADD3	NM_016824	coding	29.6557	0	0	3.27097	0	0
ADH5	NM_000671	coding	136	4	1	25.2223	20.1872	6.22965
ADI1	NM_018269	coding	85	2	0	24.8592	15.9173	0
ADIPOR1	NM_015999	coding	91.333	0.510632	0.255316	20.5831	3.13156	1.93277
ADIPOR2	NM_024551	coding	74	0	0	9.1481	0	0
ADIRF	NM_006829	coding	26	0	0	18.9647	0	0
ADK	NM_001202449	coding	26.7981	0.000192961	0	5.90094	0.00115627	0
ADK	NM_001202450	coding	19.8238	0.986199	0	5.19621	7.03453	0
ADK	NM_001123	coding	38.2921	5.96205e-05	0	8.23222	0.000348798	0
ADM	NM_001124	coding	53	5	1	17.9287	46.0272	11.363
ADM2	NM_001253845	coding	8.50536	0.94504	0	1.03399	3.12638	0
ADNP	NM_181442	coding	25.2417	0	0	2.72645	0	0
ADNP	NM_015339	coding	26.7583	0	0	2.78293	0	0
ADNP2	NM_014913	coding	15	0	0	1.36486	0	0
ADO	NM_032804	coding	55	1	0	7.23928	3.58181	0
ADORA2A	NM_000675	coding	10	0	0	1.91023	0	0
ADORA2A-AS1	NR_028483	nonCoding	1	0	1	0.2774	0	9.31804
ADORA2B	NM_000676	coding	90	1	0	23.4031	7.07622	0
ADPGK	NM_031284	coding	28.6974	0	0	5.49686	0	0
ADPRHL1	NM_199162	coding	8.99879	0	0	2.35625	0	0
ADPRHL2	NM_017825	coding	38	0	0	11.0149	0	0
ADPRM	NM_020233	coding	11	0	0	3.55192	0	0
ADRB2	NM_000024	coding	105	1	0	25.2044	6.53216	0
ADRBK1	NM_001619	coding	144	0	1	20.4947	0	4.78077
ADRBK2	NM_005160	coding	12	0	1	0.649584	0	1.81833
ADRM1	NM_007002	coding	153.675	2.32566	0.930263	53.6127	22.0791	10.9016
ADRM1	NM_175573	coding	23.3254	2.67434	1.06974	8.16082	25.4619	12.5719
ADSL	NM_001123378	coding	19.8728	7.29552e-22	0	7.02809	7.02111e-21	0
ADSL	NM_000026	coding	51.1272	3	0	16.0338	25.6021	0
ADSS	NM_001126	coding	93	0	0	16.3858	0	0
AEN	NM_022767	coding	57	0	0	8.96643	0	0
AES	NM_001130	coding	239.428	1.34033	0.446775	70.0233	10.6672	4.38911
AES	NM_198970	coding	11.0651	1.46331	0.48777	3.24192	11.6668	4.80043
AES	NM_198969	coding	5.50767	0.196365	0.0654552	1.54886	1.50273	0.618312
AF064858.8	ENST00000417335.1	nonCoding	0	1	0	0	9.44665	0
AF129075.5	ENST00000457162.1	nonCoding	1	0	0	1.38075	0	0
AFAP1	NM_198595	coding	203.271	1.66836	0.834178	13.253	2.96005	1.82691
AFAP1	NM_001134647	coding	21.7284	0.331644	0.165822	1.37072	0.56933	0.351384
AFAP1-AS1	NR_026892	nonCoding	36	0	0	2.59728	0	0
AFAP1L1	NM_001146337	coding	0.426937	0	1.6423	0.0512539	0	6.6227
AFAP1L1	NM_152406	coding	12.5731	0	0.357695	1.46317	0	1.39825
AFAP1L2	NM_032550	coding	5.22882	0.53696	0	0.646565	1.80684	0
AFAP1L2	NM_001001936	coding	31.7712	0.46304	0	3.91678	1.5534	0
AFF1	NM_001166693	coding	60.2735	0	0	3.1819	0	0
AFF3	NM_002285	coding	25.1434	0	0	1.51461	0	0
AFF3	NM_001025108	coding	27.8566	0	0	1.68157	0	0
AFF4	NM_014423	coding	226	2	1	11.5634	2.78469	1.71868
AFG3L1P	NR_003227	nonCoding	1.20219	0	0.979031	0.201186	0	5.50349
AFG3L2	NM_006796	coding	96	0	0	14.6637	0	0
AFMID	NM_001010982	coding	15.9934	0	0	4.53146	0	0
AFTPH	NM_001002243	coding	41.5813	0	0.429424	5.04998	0	1.75185
AFTPH	NM_017657	coding	0.264207	3	0.414071	0.0320636	9.9074	1.68796
AFTPH	NM_203437	coding	15.1544	0	0.156506	1.80296	0	0.625451
AGAP1	NM_014914	coding	61.2622	0	2.02005	2.80877	0	3.11104
AGAP1	NM_001037131	coding	10.7378	0	0.979949	0.485096	0	1.48708
AGAP3	NM_031946	coding	117.88	0	0	17.8777	0	0
AGAP3	NM_001042535	coding	5.11961	0	0	1.22712	0	0
AGAP6	NM_001077665	coding	7	0	0	1.23779	0	0
AGBL5	NM_001035507	coding	37.7634	0	0	7.59552	0	0
AGBL5	NM_021831	coding	12.2366	0	0	1.85294	0	0
AGFG1	NM_001135188	coding	60.3908	0	0	3.41818	0	0
AGFG1	NM_004504	coding	76.162	0	0	4.30787	0	0
AGFG2	NM_006076	coding	15	0	0	1.52826	0	0
AGGF1	NM_018046	coding	56	0	0	6.08901	0	0
AGK	NM_018238	coding	62	1	1	10.3898	4.56023	5.62905
AGO1	NM_012199	coding	45	2	3	2.94964	3.56744	6.60536
AGO2	NM_012154	coding	89.9259	0.570365	0.190121	12.5939	2.17369	0.894384
AGO2	NM_001164623	coding	6.07415	2.42964	0.809879	0.876203	9.53741	3.92426
AGO3	NM_024852	coding	25.9992	0	0	3.49627	0	0
AGO4	NM_017629	coding	18	1	0	1.24971	1.88933	0
AGPAT1	NM_032741	coding	106.608	6.94853	0	25.5904	45.3889	0
AGPAT1	NM_006411	coding	64.3918	0.0514727	0	13.9843	0.304199	0
AGPAT2	NM_006412	coding	76.3062	0.166415	0	24.1619	1.43395	0
AGPAT2	NM_001012727	coding	2.6938	3.83359	0	0.909373	35.2169	0
AGPAT3	NM_020132	coding	112.663	0	0.57591	8.4246	0	1.44658
AGPAT3	NM_001037553	coding	62.3374	0	1.42409	4.74835	0	3.64376
AGPAT4	NM_020133	coding	19	0	0	1.18202	0	0
AGPAT5	NM_018361	coding	56	0	0	4.97359	0	0
AGPAT6	NM_178819	coding	81	0	0	6.29213	0	0
AGPAT9	NM_001256421	coding	0.0445655	0.469184	0	0.00830271	2.37868	0
AGPAT9	NM_032717	coding	50.9141	0.0952888	0	9.18186	0.467633	0
AGPAT9	NM_001256422	coding	0.0413685	0.435527	0	0.00769541	2.20469	0
AGPS	NM_003659	coding	49	0	0	3.13348	0	0
AGR2	NM_006408	coding	13	0	0	6.48235	0	0
AGRN	NM_198576	coding	252	3	2	16.8607	5.46219	4.49494
AGTPBP1	NM_015239	coding	66	2	2	7.32086	6.03696	7.4519
AGTRAP	NM_020350	coding	22.467	0	0	9.30898	0	0
AGXT2L2	NM_153373	coding	17	0	0	4.1395	0	0
AHCTF1	NM_015446	coding	140	0	1	7.95077	0	1.90766
AHCTF1P1	NR_077058	nonCoding	22	0	0	1.22042	0	0
AHCY	NM_001161766	coding	0.563203	0.347603	0	0.116433	1.95553	0
AHCY	NM_000687	coding	312.436	11.6524	0	69.3907	70.4248	0
AHCYL1	NM_006621	coding	143.3	1.97589	0	17.814	6.68419	0
AHCYL1	NM_001242674	coding	44.2406	1.8702e-14	0	5.88472	6.76961e-14	0
AHCYL2	NM_015328	coding	14.6764	0	1	1.4203	0	3.25073
AHCYL2	NM_001130720	coding	15.1087	0	0	1.46301	0	0
AHDC1	NM_001029882	coding	12	1	0	0.905477	2.05337	0
AHNAK	NM_001620	coding	2063.56	63.6899	2.12323	53.7595	45.1522	1.85803
AHNAK	NM_024060	coding	1.4394	0.310095	0.87677	0.646102	3.78777	13.2198
AHNAK2	NM_138420	coding	183	4	2	4.8971	2.91285	1.79778
AHR	NM_001621	coding	89	1	0	6.9833	2.13521	0
AHSA1	NM_012111	coding	125	3	0	43.7647	28.5829	0
AHSA2	NM_152392	coding	16	0	0	2.58748	0	0
AIDA	NM_022831	coding	115	3	0	18.7522	13.312	0
AIFM1	NM_004208	coding	61.327	0	0	13.26	0	0
AIFM2	NM_032797	coding	18.4071	0	0	2.77873	0	0
AIFM2	NM_001198696	coding	17.5929	0	0	2.65336	0	0
AIG1	NM_016108	coding	12	0	0	4.24692	0	0
AIM1	NM_001624	coding	26	0	0	1.68754	0	0
AIM2	NM_004833	coding	10	0	0	3.303	0	0
AIMP1	NM_001142415	coding	8.32009	0.763243	0	1.61642	4.03513	0
AIMP1	NM_001142416	coding	44.6797	0.236742	0	8.4754	1.22207	0
AIMP2	NM_006303	coding	42	0	1	16.8884	0	13.5069
AIP	NM_003977	coding	157	1	0	62.4136	10.8181	0
AJUBA	NM_198086	coding	8.88819	0	1.99999	1.33559	0	10.095
AJUBA	NM_032876	coding	360.112	3	5.76774e-06	41.7094	9.45558	2.24399e-05
AK1	NM_000476	coding	45	2	0	9.73408	11.7729	0
AK2	NM_001199199	coding	1.80813	1.0644	8.21323e-22	0.243016	3.89296	3.70799e-21
AK2	NM_013411	coding	118.087	0.771828	5.95568e-22	15.7675	2.80446	2.67121e-21
AK2	NM_001625	coding	55.4122	0	1.77232	9.84455	0	10.5767
AK3	NM_001199855	coding	0.000285059	0.370648	0	3.46628e-05	1.22648	0
AK3	NM_001199853	coding	0.000310399	0.403597	0	3.78098e-05	1.33783	0
AK3	NM_016282	coding	32.9478	0.0117725	0	3.73407	0.0363074	0
AK4	NM_001005353	coding	2.21612	0.730788	0	0.155225	1.39293	0
AK4	NM_013410	coding	76.9328	1.66951	0	5.48027	3.2363	0
AK4	NM_203464	coding	4.85115	1.59971	0	0.345269	3.09829	0
AK5	NM_174858	coding	13	0	0	1.91643	0	0
AK8	NM_152572	coding	0	1	0	0	6.33365	0
AKAP1	NM_001242902	coding	25.6491	0.35729	0	3.13212	1.18729	0
AKAP1	NM_003488	coding	3.27673	0.628493	0	0.404773	2.11272	0
AKAP10	NM_007202	coding	60	0	0	7.46255	0	0
AKAP11	NM_016248	coding	90	1	0	4.44706	1.34462	0
AKAP12	NM_144497	coding	82.4091	0	1.53697	4.90815	0	3.07486
AKAP13	NM_001270546	coding	2.28746	0	1	0.122834	0	1.80379
AKAP13	NM_006738	coding	26.2639	1.4669	8.77657e-09	0.965838	1.46797	1.08415e-08
AKAP13	NM_007200	coding	27.4486	1.5331	9.1726e-09	1.01031	1.53559	1.13409e-08
AKAP2	NM_001004065	coding	79.0475	0.602014	0.802686	5.5646	1.15325	1.89806
AKAP2	NM_001198656	coding	38.9955	0.457875	0.6105	2.72982	0.872242	1.43557
AKAP2	NM_001136562	coding	173.555	1.90794	2.54392	12.5085	3.742	6.15873
AKAP8	NM_005858	coding	27	1	0	3.73538	3.7648	0
AKAP8L	NM_014371	coding	35	3	3	8.11532	18.929	23.3656
AKAP9	NM_005751	coding	46.6882	0	0	1.83623	0	0
AKAP9	NM_147185	coding	51.3118	0	0	2.02197	0	0
AKIP1	NM_020642	coding	29.5922	0	0	11.0895	0	0
AKIRIN1	NM_024595	coding	53.9899	0.0766485	0	9.70798	0.375051	0
AKIRIN1	NM_001136275	coding	0.0101155	0.923352	0	0.00191365	4.75349	0
AKIRIN2	NM_018064	coding	13	0	0	3.29821	0	0
AKNA	NM_030767	coding	26	0	0	1.72617	0	0
AKR1A1	NM_153326	coding	5.6485	0.0425999	0	1.90682	0.391341	0
AKR1A1	NM_001202413	coding	12.7577	0.945097	0	4.58794	9.24896	0
AKR1A1	NM_001202414	coding	30.5534	0.0116244	0	10.0444	0.103993	0
AKR1A1	NM_006066	coding	14.0404	0.000678541	0	4.35577	0.00572838	0
AKR1B1	NM_001628	coding	295	6	7	103.433	57.2475	82.4426
AKR1C1	NM_001353	coding	3	0	3	1.06635	0	35.8194
AKR1C3	NM_003739	coding	16	0	0	6.40739	0	0
AKR1E2	NM_001271025	coding	0.984829	0.984829	0	0.35864	9.75951	0
AKR7A2	NM_003689	coding	51	2	2	9.54502	10.1861	12.5735
AKT1	NM_001014432	coding	71.6616	0.737064	0.552799	12.2947	3.44118	3.18579
AKT1	NM_005163	coding	45.076	0.0819329	0.0614497	7.39446	0.365755	0.33861
AKT1	NM_001014431	coding	150.262	3.181	2.38575	26.5609	15.3012	14.1656
AKT1S1	NM_032375	coding	17.6153	0.000454952	0	3.53869	0.00248707	0
AKT1S1	NM_001098632	coding	20.9035	4.99955	0	5.07738	33.0462	0
AKT1S1	NM_001098633	coding	8.4812	0	0	2.30188	0	0
AKT2	NM_001243028	coding	22.0113	0.583566	0.583566	2.08688	1.50561	1.85849
AKT2	NM_001243027	coding	17.5518	0.243608	0.243608	1.63467	0.617406	0.762113
AKT2	NM_001626	coding	161.437	0.172826	0.172826	14.9303	0.434956	0.536901
AKT3	NM_005465	coding	154.358	0	1.0121e-32	10.6836	0	2.35304e-32
AKT3	NM_001206729	coding	2.61801	0	0.991099	0.814765	0	10.3609
AKTIP	NM_022476	coding	8.52273	0	0	1.90495	0	0
AL161772.1	ENST00000581760.1	nonCoding	37	45	10	223.903	7410.37	2032.71
AL162407.1	ENST00000451472.1	coding	18	0	0	3.64586	0	0
AL354933.1	ENST00000390196.1	nonCoding	1	0	0	4.33774	0	0
AL591845.1	ENST00000373137.1	coding	5	0	0	1.33633	0	0
AL591893.1	ENST00000432386.1	nonCoding	0	1	0	0	3.24621	0
ALAD	NM_000031	coding	15	0	1	2.30992	0	5.17278
ALAS1	NM_199166	coding	83.2003	0	0.975187	17.9261	0	7.05777
ALAS1	NM_000688	coding	28.7997	0	0.0248127	5.75717	0	0.166615
ALB	NM_000477	coding	0	21	0	0	124.66	0
ALCAM	NM_001243280	coding	125.396	1.19293	0	12.6185	3.2667	0
ALCAM	NM_001627	coding	237.129	0.807069	0	23.6726	2.19251	0
ALDH16A1	NM_153329	coding	14.4963	0.232847	0	2.28769	0.999958	0
ALDH16A1	NM_001145396	coding	2.50372	2.76715	0	0.41559	12.4992	0
ALDH18A1	NM_001017423	coding	59.3235	1.56369	0	8.41143	6.03342	0
ALDH18A1	NM_002860	coding	96.6767	1.43631	0	13.684	5.53233	0
ALDH1A3	NM_000693	coding	25	0	0	3.50619	0	0
ALDH1B1	NM_000692	coding	117	3	0	18.6806	13.0345	0
ALDH2	NM_000690	coding	39.4595	0	0	9.38917	0	0
ALDH3A2	NM_000382	coding	36.4597	0.82863	0	4.82747	2.98564	0
ALDH3B1	NM_001030010	coding	0.569555	0	1.65225	0.103207	0	10.057
ALDH3B1	NM_000694	coding	47.5702	0	0.234332	8.28321	0	1.37061
ALDH3B1	NM_001161473	coding	6.86027	0	0.113415	1.17699	0	0.653614
ALDH4A1	NM_001161504	coding	7.99242	0	0	1.20802	0	0
ALDH6A1	NM_005589	coding	42	0	0	9.44355	0	0
ALDH7A1	NM_001182	coding	40.4997	3.49669	0	4.02178	9.44919	0
ALDH7A1	NM_001201377	coding	40.4997	3.49669	0	4.02178	9.44919	0
ALDH8A1	NM_001193480	coding	0	0	0.429345	0	0	2.9357
ALDH8A1	NM_170771	coding	1	0	0.548429	0.204576	0	3.76873
ALDH9A1	NM_000696	coding	108	2	1	21.1751	10.6709	6.58599
ALDOA	NM_001127617	coding	15.3962	1.61318	1.34552	4.68157	13.3484	13.7432
ALDOA	NM_184043	coding	425.57	10.6805	8.90842	134.493	91.8524	94.5692
ALDOA	NM_001243177	coding	20.0068	0.328261	0.0387837	5.65877	2.52658	0.368478
ALDOA	NM_184041	coding	350.174	31.3781	3.70727	108.704	265.068	38.6574
ALDOC	NM_005165	coding	14	2	0	4.15646	16.1583	0
ALG1	NM_019109	coding	22	0	0	2.74114	0	0
ALG10	NM_032834	coding	7	0	0	1.09727	0	0
ALG12	NM_024105	coding	9	0	0	1.85903	0	0
ALG13	NM_001168385	coding	8.05054	0	0	1.30191	0	0
ALG13	NM_001099922	coding	22.5082	0	0	2.65019	0	0
ALG14	NM_144988	coding	4	0	0	1.85493	0	0
ALG2	NM_033087	coding	38.0367	0	0	6.58807	0	0
ALG3	NM_005787	coding	0.00286003	0.226602	0	0.000914474	1.97167	0
ALG5	NM_013338	coding	26.9834	0	0	10.9038	0	0
ALG6	NM_013339	coding	7	0	0	1.01785	0	0
ALG8	NM_001007027	coding	10.3402	0.103852	0	2.90787	0.794748	0
ALG8	NM_024079	coding	34.6598	0.896148	0	10.1853	7.16632	0
ALKBH1	NM_006020	coding	14	0	0	2.65467	0	0
ALKBH2	NM_001145374	coding	13.2018	0	0	5.40606	0	0
ALKBH2	NM_001205180	coding	4.49773	0	0	2.5998	0	0
ALKBH3	NM_139178	coding	25	2	0	7.81015	17.0028	0
ALKBH4	NM_017621	coding	8	0	0	1.84881	0	0
ALKBH5	NM_017758	coding	169	2	4	24.1299	7.77085	19.1844
ALKBH6	NM_032878	coding	5.20921	0.119613	0	2.61348	1.63304	0
ALKBH6	NM_198867	coding	2.79079	0.880387	0	1.45837	12.5194	0
ALKBH7	NM_032306	coding	34	0	1	12.5211	0	12.3704
ALKBH8	NM_138775	coding	18	0	0	2.16941	0	0
ALMS1	NM_015120	coding	143	2	1	5.42436	2.06449	1.27418
ALMS1-IT1	ENST00000441587.1	nonCoding	4	0	0	1.11023	0	0
ALS2	NM_020919	coding	57.9755	0	0	4.10777	0	0
ALS2CL	NM_147129	coding	28.7395	0	0	2.85279	0	0
ALYREF	NM_005782	coding	66	3	2	29.4903	36.4777	30.0182
AMACR	NM_001167595	coding	7.34977	0	0	1.38402	0	0
AMBRA1	NM_001267783	coding	10.4016	0	0	1.03208	0	0
AMD1	NM_001634	coding	135.779	1	0.0166421	19.4546	3.89906	0.0800969
AMD1	NM_001033059	coding	1.22064	0	1.98336	0.192818	0	10.524
AMDHD2	NM_015944	coding	7	0	0	2.16477	0	0
AMER1	NM_152424	coding	16	1	0	0.928893	1.57985	0
AMFR	NM_001144	coding	101	0	0	13.7519	0	0
AMIGO2	NM_001143668	coding	41	0	0	6.57187	0	0
AMIGO3	NM_198722	coding	9	1	0	1.48435	4.48811	0
AMMECR1	NM_001025580	coding	10.9823	0	0	1.01454	0	0
AMMECR1L	NM_001199140	coding	20.4915	0.426906	0	2.14942	1.21857	0
AMMECR1L	NM_031445	coding	27.5085	0.573094	0	2.90284	1.64571	0
AMN	NM_030943	coding	5	0	0	1.57407	0	0
AMOTL1	NM_130847	coding	176	7	0	9.58652	10.3757	0
AMOTL2	NM_016201	coding	303	1	0	29.7994	2.6763	0
AMPD2	NM_139156	coding	70.3108	0	0	9.17569	0	0
AMPD3	NM_001025389	coding	29.7341	0	0	3.36286	0	0
AMZ1	NM_133463	coding	1	0	1	0.111023	0	3.72933
AMZ2	NM_016627	coding	73.0678	0.0109097	0	18.0885	0.0734951	0
AMZ2	NM_001033574	coding	1.78179	0.98909	0	0.483593	7.30518	0
ANAPC1	NM_022662	coding	87	0	0	5.51246	0	0
ANAPC10	NM_001256712	coding	0.000210011	1	0	7.7051e-05	9.98403	0
ANAPC10	NM_014885	coding	4.32841	0	0	1.45617	0	0
ANAPC10	NM_001256706	coding	12.6714	0	0	4.23097	0	0
ANAPC11	NM_001002248	coding	22.8934	8.38361e-05	0	12.8983	0.00128536	0
ANAPC11	NM_016476	coding	5.12641	2.46602e-05	0	2.81703	0.00036876	0
ANAPC11	NM_001002246	coding	11.9719	0.000131831	0	6.80764	0.00203997	0
ANAPC11	NM_001002247	coding	12.2384	0.00333481	0	7.43349	0.0551201	0
ANAPC11	NM_001002244	coding	3.35142	2.99098	0	1.45376	35.306	0
ANAPC11	NM_001002245	coding	8.41849	0.00543353	0	5.16452	0.0907085	0
ANAPC13	NM_001242374	coding	4.66732	0	1.05187e-09	1.242	0	9.40233e-09
ANAPC13	NM_015391	coding	23.3327	0	0.999715	9.4676	0	13.6261
ANAPC15	NM_014042	coding	18	1	0	10.0034	15.1232	0
ANAPC16	NM_173473	coding	25.4048	0.0871079	0	3.83983	0.35828	0
ANAPC16	NM_001242546	coding	18.4699	0.000797402	0	2.53664	0.00298018	0
ANAPC16	NM_001242547	coding	0.125167	0.238569	0	0.0193115	1.00164	0
ANAPC2	NM_013366	coding	54	0	0	9.8033	0	0
ANAPC4	NM_013367	coding	18	0	0	3.30201	0	0
ANAPC5	NM_001137559	coding	80.8761	0.994127	0	16.7693	5.60928	0
ANAPC5	NM_016237	coding	83.1239	0.00587262	0	15.5217	0.0298411	0
ANAPC7	NM_016238	coding	73	1	0	11.7511	4.38052	0
ANG	NM_001145	coding	2.54583	0	0	1.02118	0	0
ANG	NM_001097577	coding	7.45417	0	0	4.92422	0	0
ANGEL1	NM_015305	coding	19	0	0	2.26542	0	0
ANGEL2	NM_144567	coding	29	0	0	3.0576	0	0
ANGPT2	NM_001118888	coding	1.36532	0.68266	0	0.13094	1.7816	0
ANGPTL2	NM_012098	coding	46	0	0	6.31232	0	0
ANKFY1	NM_016376	coding	32.064	0.88628	0	1.9747	1.48534	0
ANKH	NM_054027	coding	46	1	0	2.74736	1.62528	0
ANKHD1	NM_017747	coding	25.8003	0.680712	0	1.53831	1.10446	0
ANKHD1	NM_024668	coding	4.86258	0	0	1.09585	0	0
ANKHD1	NM_001197030	coding	9.15352	0	0	2.17275	0	0
ANKHD1-EIF4EBP3	NM_020690	coding	43.2081	0.319288	0	2.53672	0.510106	0
ANKIB1	NM_019004	coding	134	1	0	10.8012	2.1935	0
ANKLE2	NM_015114	coding	62	1	1	6.81701	2.99207	3.69335
ANKMY1	NM_016552	coding	10.8662	0	0	1.64289	0	0
ANKMY2	NM_020319	coding	34	2	0	6.52274	10.4412	0
ANKRA2	NM_023039	coding	25	0	0	5.57513	0	0
ANKRD1	NM_014391	coding	714	12	0	177.294	81.0861	0
ANKRD10	NM_017664	coding	20	0	0	3.92918	0	0
ANKRD10-IT1	ENST00000426991.1	nonCoding	1	0	0	1.28991	0	0
ANKRD11	NM_001256183	coding	68.0243	0.375558	0.960201	3.58259	0.538245	1.69869
ANKRD11	NM_001256182	coding	2.15841	0.254768	0.651374	0.112779	0.36225	1.14325
ANKRD11	NM_013275	coding	3.13189	0.369674	0.945157	0.164892	0.529641	1.67153
ANKRD12	NM_001083625	coding	45.1947	0.417612	0	1.97037	0.495454	0
ANKRD13A	NM_033121	coding	193	0	0	24.2072	0	0
ANKRD13B	NM_152345	coding	3	0	1	0.46344	0	5.18909
ANKRD13C	NM_030816	coding	76	2	1	6.57359	4.70749	2.90541
ANKRD13D	NM_207354	coding	34.4039	0	0	7.88018	0	0
ANKRD16	NM_019046	coding	13.7591	0	0	2.5663	0	0
ANKRD17	NM_032217	coding	132.982	0	0	6.95287	0	0
ANKRD18A	NM_147195	coding	9	0	0	1.18017	0	0
ANKRD26	NM_014915	coding	4.45121	0	0.989155	0.321851	0	2.40248
ANKRD26	NM_001256053	coding	4.54879	0	1.01084	0.329052	0	2.45625
ANKRD27	NM_032139	coding	120	0	1	13.209	0	3.6975
ANKRD28	NM_015199	coding	203.313	0.610986	0	15.7237	1.28585	0
ANKRD28	NM_001195099	coding	23.3711	4.9537	0	1.88633	10.8802	0
ANKRD28	NM_001195098	coding	37.3165	0.435318	0	2.86607	0.909835	0
ANKRD29	NM_173505	coding	30	1	0	6.4694	5.86831	0
ANKRD30BL	NR_027020	nonCoding	21	1	0	7.22349	9.36047	0
ANKRD32	NM_032290	coding	13	0	0	1.67116	0	0
ANKRD33B	NM_001164440	coding	37	0	0	1.94322	0	0
ANKRD36	NM_001164315	coding	22	2	0	1.72043	4.25612	0
ANKRD36B	NM_025190	coding	21	0	0	1.71959	0	0
ANKRD36C	ENST00000456556.1	coding	22	0	0	1.98667	0	0
ANKRD37	NM_181726	coding	2	0	0	1.0496	0	0
ANKRD39	NM_016466	coding	4	0	0	2.18336	0	0
ANKRD40	NM_052855	coding	104	0	0	12.2277	0	0
ANKRD42	NM_182603	coding	14	0	0	2.6785	0	0
ANKRD46	NM_001270377	coding	9.55024	0.868247	0	1.74933	4.32783	0
ANKRD49	NM_017704	coding	13	0	0	3.34496	0	0
ANKRD50	NM_020337	coding	92.9944	0	0	5.18161	0	0
ANKRD52	NM_173595	coding	37	0	0	2.09521	0	0
ANKRD54	NM_138797	coding	4.99996	0	0	1.16761	0	0
ANKRD61	NM_001271700	coding	1	1	0	0.344459	9.37363	0
ANKRD9	NM_152326	coding	19	0	0	5.72764	0	0
ANKS1A	NM_015245	coding	43	1	0	3.31871	2.10025	0
ANKS3	NM_001242929	coding	9.28625	0	0	2.00343	0	0
ANKS6	NM_173551	coding	36	0	0	2.469	0	0
ANKZF1	NM_018089	coding	24.2806	0	0	4.61478	0	0
ANKZF1	NM_001042410	coding	8.71937	0	0	1.70548	0	0
ANLN	NM_018685	coding	347	9	1	35.6577	25.1673	3.45178
ANO10	NM_018075	coding	57.2417	0	0	10.2626	0	0
ANO10	NM_001204832	coding	17.1812	0	0	3.32084	0	0
ANO6	NM_001204803	coding	40.494	0	0	3.21646	0	0
ANO6	NM_001025356	coding	66.9519	0	0	5.37287	0	0
ANO7L1	ENST00000475369.1	coding	1	0	0	1.38075	0	0
ANO8	NM_020959	coding	25	1	1	2.95138	3.21259	3.96555
ANP32A	NM_006305	coding	66	4	1	13.1188	21.6361	6.67679
ANP32A-IT1	NR_026808	nonCoding	2	1	0	0.29879	4.06543	0
ANP32B	NM_006401	coding	65	36	17	19.7158	297.149	173.208
ANP32BP1	ENST00000564205.1	nonCoding	3	0	1	1.13377	0	12.6947
ANP32E	NM_030920	coding	98.3535	0	0.0303328	13.9616	0	0.144636
ANP32E	NM_001136479	coding	0.0636281	0	3.79029	0.0099675	0	19.9447
ANPEP	NM_001150	coding	0	0	1	0	0	4.51095
ANTXR1	NM_032208	coding	42.3905	1	5.35668e-28	3.52594	2.26348	1.49665e-27
ANTXR1	NM_053034	coding	2.39652e-10	0	1	7.18027e-11	0	10.0642
ANTXR2	NM_001145794	coding	140.391	0.992332	0	29.8676	5.74496	0
ANTXR2	NM_058172	coding	190.609	7.00767	0	11.6177	11.6231	0
ANXA1	NM_000700	coding	382	5	3	133.841	47.6722	35.3073
ANXA10	NM_007193	coding	3	0	0	1.01624	0	0
ANXA11	NM_001157	coding	36.0118	1.43462	2.15193	7.1033	7.70056	14.2581
ANXA11	NM_145868	coding	77.5764	0.551068	0.826602	15.006	2.90076	5.37095
ANXA2	NM_001002858	coding	52.949	2.73439	0.705651	15.9617	22.4312	7.14547
ANXA2	NM_001002857	coding	214.5	2.0864	0.538427	64.306	17.0213	5.42213
ANXA2	NM_001136015	coding	12.8313	1.02163	0.263648	3.79111	8.2141	2.61661
ANXA2	NM_004039	coding	954.71	25.1576	6.49227	301.136	215.939	68.7871
ANXA2P2	NR_003573	nonCoding	111	1	0	41.5331	10.1822	0
ANXA3	NM_005139	coding	189	2	0	57.2566	16.4878	0
ANXA4	NM_001153	coding	15	3	1	3.43253	18.6816	7.68673
ANXA5	NM_001154	coding	437	11	2	133.96	91.7607	20.5941
ANXA6	NM_001193544	coding	56.4855	5.31989	6.79519e-15	9.65048	24.7334	3.89971e-14
ANXA6	NM_001155	coding	461.513	0.680113	2	75.6074	3.03202	11.006
ANXA7	NM_004034	coding	9.10416	0	0	2.02475	0	0
ANXA7	NM_001156	coding	117.896	0	0	27.0292	0	0
ANXA8L2	NM_001630	coding	5	1	0	1.2079	6.57401	0
AOC3	NM_001277731	coding	1.42037	0.555587	0	0.178426	1.89923	0
AOX1	NM_001159	coding	137	0	0	13.6129	0	0
AP000704.5	ENST00000430068.1	nonCoding	1	0	0	1.1191	0	0
AP001052.9	ENST00000438837.1	nonCoding	1	0	0	1.43323	0	0
AP001469.7	ENST00000444966.1	nonCoding	1	0	0	1.25683	0	0
AP003068.23	ENST00000526623.1	coding	4	0	0	1.34846	0	0
AP004372.1	ENST00000419440.1	nonCoding	5	0	0	4.81498	0	0
AP005482.1	ENST00000400512.1	coding	1	0	0	1.87803	0	0
AP006216.11	ENST00000366405.2	nonCoding	4	0	0	3.2787	0	0
AP006621.5	ENST00000525941.1	coding	4	0	0	3.2142	0	0
AP006621.6	ENST00000533938.1	nonCoding	2	0	0	3.45187	0	0
AP1AR	NM_001128426	coding	0.186645	0.84517	0	0.0325691	4.01333	0
AP1AR	NM_018569	coding	34.8133	0.15483	1	5.86805	0.710186	5.66196
AP1B1	NM_001127	coding	42.6687	0.375212	0	5.00592	1.1979	0
AP1B1	NM_145730	coding	38.5915	0.534111	0	4.56031	1.71753	0
AP1B1	NM_001166019	coding	4.73983	1.09068	0	0.568322	3.55875	0
AP1G1	NM_001030007	coding	40.1642	0	0	2.87486	0	0
AP1G1	NM_001128	coding	42.8358	0	0	3.07013	0	0
AP1G2	NM_003917	coding	82	2	0	13.9755	9.27585	0
AP1M1	NM_032493	coding	119.704	3.38867	0	24.9149	19.1934	0
AP1M1	NM_001130524	coding	4.2962	1.61133	0	0.88074	8.98913	0
AP1M2	NM_005498	coding	11	1	0	3.07928	7.61774	0
AP1S1	NM_001283	coding	162	4	1	61.2234	41.137	12.6947
AP1S2	NM_003916	coding	30.6877	0	0	6.48364	0	0
AP1S3	NM_001039569	coding	35	0	0	4.2868	0	0
AP2A1	NM_014203	coding	16.4751	1.69379	0.282298	2.30795	6.45695	1.32839
AP2A1	NM_130787	coding	119.525	4.30621	0.717702	17.0658	16.7315	3.44216
AP2A2	NM_001242837	coding	19.2053	1.96842	0.492105	2.02186	5.6392	1.74023
AP2A2	NM_012305	coding	56.7947	2.03158	0.507895	5.98298	5.82389	1.79722
AP2B1	NM_001030006	coding	432.785	4.11344	0	36.81	9.52069	0
AP2B1	NM_001282	coding	481.215	5.88656	0	41.2297	13.7247	0
AP2M1	NM_004068	coding	64.8558	2.77276	0	16.3866	19.0644	0
AP2M1	NM_001025205	coding	192.144	3.22724	0	48.6981	22.258	0
AP2S1	NM_021575	coding	0.219721	6.99153	0	0.138788	120.178	0
AP2S1	NM_004069	coding	73.7803	0.00846616	0	40.6343	0.126885	0
AP3B1	NM_003664	coding	89.5091	1.07259	0.536295	10.868	3.54395	2.18729
AP3B1	NM_001271769	coding	2.49081	0.92741	0.463705	0.301533	3.05518	1.88562
AP3D1	NM_003938	coding	5.03142	3.45019	3.45019	0.506412	9.44988	11.6647
AP3D1	NM_001261826	coding	132.969	0.549813	0.549813	12.8909	1.45051	1.79048
AP3M1	NM_207012	coding	40.1852	0	0	3.74974	0	0
AP3M1	NM_012095	coding	36.8148	0	0	3.51967	0	0
AP3M2	NM_001134296	coding	8.71586	0	0	1.16409	0	0
AP3M2	NM_006803	coding	19.2841	0	0	2.61767	0	0
AP3S1	NM_001284	coding	34	0	0	12.9291	0	0
AP3S2	NM_005829	coding	2.52724	0.804296	0.402148	0.208757	1.80793	1.11583
AP4B1	NM_001253853	coding	10.4484	0	0	1.92391	0	0
AP4M1	NM_004722	coding	31	0	0	8.13443	0	0
AP5B1	NM_138368	coding	37	1	0	2.74998	2.02254	0
AP5M1	NM_018229	coding	15	1	0	2.3756	4.30975	0
AP5S1	NM_001204447	coding	7.63359	0	0	2.06953	0	0
AP5S1	NM_018347	coding	11.3937	0	0	2.99614	0	0
AP5Z1	NM_014855	coding	44	1	1	3.90782	2.41686	2.98333
APAF1	NM_181861	coding	21.427	0	0	1.46055	0	0
APBA2	NM_005503	coding	1.87619	0.380499	0.760997	0.252857	1.39548	3.44509
APBA2	NM_001130414	coding	28.1238	0.619501	1.239	3.82819	2.29473	5.66513
APBA3	NM_004886	coding	40	0	0	9.08554	0	0
APBB1	NM_001257323	coding	7.81196	0	0	1.91075	0	0
APBB1	NM_001164	coding	6.90317	0	0	1.2654	0	0
APBB1	NM_145689	coding	6.25729	0	0	1.1711	0	0
APBB2	NM_173075	coding	60.1593	1.25969	0	3.31102	1.88665	0
APBB2	NM_001166050	coding	59.3227	0.877284	0	3.24096	1.30426	0
APBB2	NM_004307	coding	91.2877	0.86303	0	4.98563	1.28264	0
APBB3	NM_133174	coding	12.088	0	0	2.78044	0	0
APBB3	NM_133172	coding	5.79056	0	0	1.31893	0	0
APBB3	NM_006051	coding	5.0521	0	0	1.14753	0	0
APC	NM_001127510	coding	25.0752	1.3158	0	1.13406	1.6194	0
APC	NM_000038	coding	40.961	2.14938	0	1.87117	2.67194	0
APC	NM_001127511	coding	30.9639	1.53481	0	1.4048	1.89489	0
APCDD1L	NM_153360	coding	19	0	0	2.99265	0	0
APCDD1L-AS1	NR_034147	nonCoding	2	2	0	0.467715	12.7277	0
APEH	NM_001640	coding	115	2	0	20.4384	9.67271	0
APEX1	NM_001641	coding	81.2742	0.0601835	0	25.6521	0.516914	0
APEX1	NM_001244249	coding	6.35419	0.0704858	0	2.01202	0.607356	0
APEX1	NM_080649	coding	1.83007	0.363924	0	0.599221	3.24266	0
APEX1	NM_080648	coding	2.54155	0.505407	0	0.837779	4.53359	0
APEX2	NM_014481	coding	46.2104	0.0236054	0	10.8118	0.150293	0
APEX2	NM_001271748	coding	4.7896	1.97639	0	1.22659	13.7735	0
APH1A	NM_016022	coding	63.8572	2.5569e-06	2.5569e-06	13.8131	1.5051e-05	1.85787e-05
APH1A	NM_001077628	coding	8.50467	0.00700172	0.00700172	2.16219	0.0484407	0.0597942
APH1A	NM_001243772	coding	0.138988	1.99211	1.99211	0.0396549	15.4669	19.092
APH1B	NM_031301	coding	13.9878	0	0	1.63519	0	0
API5	NM_001142930	coding	20.1763	0	0	2.62467	0	0
API5	NM_006595	coding	68.2603	0	0	8.89153	0	0
APIP	NM_015957	coding	11	0	0	4.28602	0	0
APLF	NM_173545	coding	23	0	0	2.92902	0	0
APLP2	NM_001642	coding	37.781	2.63286e-06	0	4.85806	9.2127e-06	0
APLP2	NM_001142276	coding	52.9564	0.010993	0	6.8743	0.0388328	0
APLP2	NM_001142277	coding	272.628	0.102241	0	37.0379	0.377983	0
APLP2	NM_001142278	coding	20.8089	1.91773	0	3.30197	8.28099	0
APLP2	NM_001243299	coding	100.717	0.0322358	0	13.3644	0.1164	0
APMAP	NM_020531	coding	104	2	0	22.9523	12.0114	0
APOA1	NM_000039	coding	0	1	0	0	14.8703	0
APOA1BP	NM_144772	coding	45	2	2	19.6766	23.7978	29.3755
APOBEC3B	NM_004900	coding	17.9997	0	0	5.73655	0	0
APOBEC3C	NM_014508	coding	15	2	0	6.62983	24.0553	0
APOBEC3D	NM_152426	coding	8	0	0	1.56665	0	0
APOBEC3G	NM_021822	coding	6	0	0	1.60359	0	0
APOC1	NM_001645	coding	9	0	0	9.56938	0	0
APOE	NM_000041	coding	3	0	0	1.24618	0	0
APOL1	NM_003661	coding	1.93505	0.241881	0.241881	0.331293	1.12692	1.39104
APOL1	NM_001136541	coding	4.91929	0.614911	0.614911	0.858406	2.91993	3.6043
APOL2	NM_030882	coding	5.60117	0	0	1.07878	0	0
APOL3	NM_145640	coding	4.45279	0.890558	0	1.02759	5.59268	0
APOL6	NM_030641	coding	63	0	0	3.0457	0	0
APOLD1	NM_030817	coding	2.22814	0	0.723326	0.235125	0	2.56395
APOLD1	NM_001130415	coding	19.7719	0	0.276674	2.04591	0	0.96167
APOO	NM_024122	coding	15.8185	0	0.000650671	6.86775	0	0.00948917
APOOL	NM_198450	coding	13	0	1	0.985333	0	2.546
APOPT1	NM_032374	coding	34	2	1	13.4944	21.6011	13.332
APP	NM_001204301	coding	65.5335	2.66989	0.00426218	8.9752	9.95048	0.0196079
APP	NM_001204303	coding	1.54398	0.690369	0.102652	0.225642	2.74556	0.503922
APP	NM_001204302	coding	64.6223	5.86325	0.00936002	8.99364	22.2055	0.0437571
APP	NM_001136016	coding	114.626	0.0762102	0.00576561	15.7958	0.285787	0.0266884
APP	NM_000484	coding	305.547	1.28178	0.00204621	41.2245	4.70608	0.00927355
APP	NM_001136131	coding	12.3874	0.023666	0.244929	1.84275	0.0958035	1.2239
APP	NM_001136129	coding	0.989668	0.0483456	0.558791	0.149722	0.199033	2.83966
APP	NM_001136130	coding	49.4499	0.248975	0.0208208	6.99527	0.95844	0.098936
APP	NM_201414	coding	9.72	0.31564	0.0469327	1.39801	1.23539	0.226745
APP	NM_201413	coding	308.578	2.78188	0.00444096	42.2971	10.3766	0.0204475
APPBP2	NM_006380	coding	75	0	0	5.68373	0	0
APPL1	NM_012096	coding	94	1	0	7.60322	2.2011	0
APPL2	NM_018171	coding	52.711	0	0	7.9991	0	0
APPL2	NM_001251905	coding	16.009	0	0	2.39751	0	0
APRT	NM_001030018	coding	23.1824	0.00476659	1	16.8844	0.0944725	24.465
APRT	NM_000485	coding	57.8176	3.99523	0	35.118	66.036	0
APTX	NM_001195248	coding	16.2402	0	0	3.9802	0	0
AQP1	NM_001185062	coding	4.40733	0.734555	0	0.88756	4.02547	0
AQP1	NM_001185060	coding	1.53381	0.255634	0	0.302299	1.37106	0
AQR	NM_014691	coding	89	0	0	8.58754	0	0
ARAF	NM_001654	coding	63.4798	0	0	12.4662	0	0
ARAP1	NM_001135190	coding	0.0631508	0.884862	0.884862	0.00654148	2.49427	3.07887
ARAP1	NM_001040118	coding	103.553	0.0158234	0.0158234	9.88091	0.0410868	0.0507166
ARAP2	NM_015230	coding	34	0	0	2.26373	0	0
ARAP3	NM_022481	coding	22	2	0	2.04934	5.06981	0
ARC	NM_015193	coding	3	1	4	0.498811	4.52465	22.3405
ARCN1	NM_001655	coding	495.089	0.206792	0.0344653	60.4422	0.687006	0.141337
ARCN1	NM_001142281	coding	49.9078	5.79321	0.965535	6.52174	20.6008	4.2382
AREG	NM_001657	coding	15	3	0	5.939	32.3231	0
AREL1	NM_001039479	coding	130	1	0	11.7027	2.44971	0
ARF1	NM_001658	coding	862.641	15.9811	3.19622	223.96	112.906	27.8737
ARF1	NM_001024228	coding	50.3174	1.37227	0.274453	12.4251	9.22126	2.27651
ARF1	NM_001024226	coding	67.7146	1.84704	0.369408	16.8228	12.4871	3.08276
ARF1	NM_001024227	coding	29.3171	0.799618	0.159923	7.16005	5.31432	1.31198
ARF3	NM_001659	coding	205	2	0	28.4093	7.54236	0
ARF4	NM_001660	coding	301	3	0	84.7929	22.9977	0
ARF5	NM_001662	coding	104	2	2	46.512	24.3406	30.0456
ARF6	NM_001663	coding	250	8	2	31.1097	27.0905	8.35997
ARFGAP1	NM_018209	coding	121.257	0.589166	2.94583	18.2879	2.41806	14.924
ARFGAP1	NM_175609	coding	10.7436	0.410835	2.05417	1.60847	1.67379	10.3304
ARFGAP2	NM_001242832	coding	6.67512	0	0	1.11365	0	0
ARFGAP2	NM_032389	coding	80.3248	0	0	13.0286	0	0
ARFGAP3	NM_014570	coding	55.4088	0.0880249	0	9.58683	0.414449	0
ARFGAP3	NM_001142293	coding	6.59117	0.911975	0	1.19613	4.50371	0
ARFGEF1	NM_006421	coding	45	0	0	3.05293	0	0
ARFGEF2	NM_006420	coding	171	0	3	9.309	0	5.48589
ARFIP1	NM_001025595	coding	34.8259	0.0197154	0	5.52441	0.0851059	0
ARFIP1	NM_014447	coding	16.4618	0.887723	0	2.82231	4.14167	0
ARFIP2	NM_012402	coding	117.562	0.0398743	0	15.5449	0.143477	0
ARFIP2	NM_001242856	coding	0.430399	0.799197	0	0.0605009	3.05714	0
ARFIP2	NM_001242854	coding	34.649	0.00656667	0	4.41594	0.0227745	0
ARFRP1	NM_001267548	coding	16.1758	0	0	3.22834	0	0
ARFRP1	NM_001267547	coding	23.7069	0	0	4.54094	0	0
ARG2	NM_001172	coding	8	0	0	1.98046	0	0
ARGLU1	NM_018011	coding	55	2	0	15.3964	15.2355	0
ARHGAP1	NM_004308	coding	19	1	0	2.70259	3.87077	0
ARHGAP10	NM_024605	coding	16	0	0	2.56631	0	0
ARHGAP11A	NM_199357	coding	0.13044	2	4	0.0258751	10.7962	26.6531
ARHGAP11A	NM_014783	coding	42.8696	6.75875e-18	1.35175e-17	3.74166	1.60528e-17	3.96306e-17
ARHGAP11B	NM_001039841	coding	1	0	1	0.481972	0	16.1897
ARHGAP12	NM_001270695	coding	33.1891	0	0.0173011	3.19609	0	0.0559652
ARHGAP12	NM_001270699	coding	10.6761	0	0.727998	1.10964	0	2.54166
ARHGAP12	NM_018287	coding	28.7329	0	0.014978	2.75884	0	0.0483081
ARHGAP17	NM_018054	coding	22.9416	0	0	3.46645	0	0
ARHGAP18	NM_033515	coding	95	42	0	13.3083	160.11	0
ARHGAP19-SLIT1	NR_037909	nonCoding	0.161974	0	1	0.0414374	0	8.59341
ARHGAP21	NM_020824	coding	254	3	0	17.3716	5.58337	0
ARHGAP22	NM_021226	coding	26.4919	0.00020154	0	4.64095	0.000960783	0
ARHGAP22	NM_001256026	coding	0.00142118	0.99878	0	0.000296179	5.66429	0
ARHGAP23	NM_001199417	coding	61	0	0	5.06266	0	0
ARHGAP24	NM_001025616	coding	26	0	0	2.74425	0	0
ARHGAP26	NM_001135608	coding	22.0555	0	0	1.21798	0	0
ARHGAP27	NM_174919	coding	10	0	0	3.55966	0	0
ARHGAP27	NM_199282	coding	42	3	0	5.64026	10.9633	0
ARHGAP29	NM_004815	coding	1119	16	0	60.1618	23.4089	0
ARHGAP31	NM_020754	coding	45	0	0	2.73022	0	0
ARHGAP32	NM_001142685	coding	52.5545	0	0	2.54776	0	0
ARHGAP35	NM_004491	coding	300	0	1	16.5447	0	1.85249
ARHGAP39	NM_025251	coding	18	0	0	1.71553	0	0
ARHGAP40	NM_001164431	coding	11	1	0	1.89986	4.70002	0
ARHGAP42	NM_152432	coding	51	0	0	5.26061	0	0
ARHGAP5	NM_001030055	coding	61.2957	0	0.496173	3.12839	0	0.850632
ARHGAP5	NM_001173	coding	141.704	0	0.503827	7.23451	0	0.864024
ARHGAP5-AS1	NR_027263	nonCoding	4	2	0	1.53057	20.8254	0
ARHGDIA	NM_004309	coding	183.856	5.89958	0.0864823	47.2822	41.2867	0.747077
ARHGDIA	NM_001185078	coding	6.64674	0.0107413	2.9122	1.83653	0.080764	27.0289
ARHGDIB	NM_001175	coding	127	0	0	51.1932	0	0
ARHGDIG	NM_001176	coding	0	0	1	0	0	17.4787
ARHGEF1	NM_199002	coding	67.852	0.43301	0.216505	10.2714	1.78375	1.10091
ARHGEF1	NM_198977	coding	51.1887	2.93394	1.46697	8.05745	12.5674	7.75646
ARHGEF1	NM_004706	coding	43.9591	0.633049	0.316525	6.70626	2.62808	1.62203
ARHGEF10	NM_014629	coding	42	1	1	3.68216	2.38574	2.94491
ARHGEF10L	NM_001011722	coding	16.902	0	0	1.94432	0	0
ARHGEF11	NM_014784	coding	28.8402	0	0.702881	2.08841	0	1.70969
ARHGEF11	NM_198236	coding	43.1598	0	0.297119	3.0709	0	0.710125
ARHGEF12	NM_015313	coding	174.33	4.72155	0	8.69371	6.40748	0
ARHGEF12	NM_001198665	coding	252.67	6.27846	0	12.674	8.57002	0
ARHGEF16	NM_014448	coding	1	0	1	0.16879	0	5.66976
ARHGEF17	NM_014786	coding	76	1	0	4.76802	1.70724	0
ARHGEF18	NM_015318	coding	138.85	3.96255	0	13.0382	10.1255	0
ARHGEF18	NM_001130955	coding	32.1506	0.037449	0	2.74501	0.0870091	0
ARHGEF2	NM_001162384	coding	63.4117	0	0.232084	7.43772	0	0.914393
ARHGEF2	NM_001162383	coding	39.6199	2	0.224065	4.64378	6.37909	0.882166
ARHGEF2	NM_004723	coding	30.9683	0	0.543852	3.69602	0	2.1803
ARHGEF28	NM_001080479	coding	99.2469	7.30935e-05	0	7.65859	0.00015349	0
ARHGEF28	NM_001244364	coding	0.00443879	0.999793	0	0.000416011	2.54989	0
ARHGEF28	NM_001177693	coding	109.749	0.00013391	0	8.57426	0.000284695	0
ARHGEF3	NM_001128615	coding	27.0862	0	0	3.64844	0	0
ARHGEF4	NM_015320	coding	18.5967	0.999341	0	2.48648	3.63608	0
ARHGEF40	NM_018071	coding	39	0	3	3.50246	0	9.05
ARHGEF7	NM_003899	coding	20.1197	0	0	1.9494	0	0
ARHGEF9	NM_001173479	coding	0.000518031	0	0.977606	5.23224e-05	0	3.31677
ARHGEF9	NM_001173480	coding	24.6652	0	0.0190727	2.29892	0	0.0597133
ARID1A	NM_006015	coding	21.9614	0.0205506	0.0205506	1.2539	0.0319299	0.0394135
ARID1A	NM_139135	coding	4.03859	0.979449	0.979449	0.249505	1.64665	2.03259
ARID1B	NM_017519	coding	17.0347	1.64852	3.29704	0.869865	2.29077	5.65535
ARID1B	NM_020732	coding	13.9653	1.35148	2.70296	0.710239	1.8704	4.61756
ARID2	NM_152641	coding	38	1	0	2.20013	1.57556	0
ARID3A	NM_005224	coding	6	0	0	1.04662	0	0
ARID3B	NM_006465	coding	9	0	0	1.0402	0	0
ARID4A	NM_023000	coding	0.502116	0.801378	0	0.0438716	1.9054	0
ARID4A	NM_002892	coding	44.304	0.198622	0	3.76235	0.459001	0
ARID4B	NM_001206794	coding	0.614701	0.728521	0	0.0506735	1.63429	0
ARID4B	NM_031371	coding	13.3855	0	0	1.12947	0	0
ARID4B	NM_016374	coding	49.9998	0.271479	0	4.03958	0.596864	0
ARID5A	NM_212481	coding	6	0	0	1.33318	0	0
ARID5B	NM_032199	coding	22.5382	0	0	1.39119	0	0
ARID5B	NM_001244638	coding	28.4618	0	0	1.9859	0	0
ARIH1	NM_005744	coding	44	1	0	4.10727	2.54022	0
ARIH2	NM_006321	coding	97	1	0	11.7051	3.28377	0
ARIH2OS	NM_001123040	coding	4	0	0	1.22695	0	0
ARL1	NM_001177	coding	140	1	0	21.3779	4.15535	0
ARL13B	NM_144996	coding	4.83882	0	1.30094	0.646978	0	5.84286
ARL14EP	NM_152316	coding	20	0	0	5.53859	0	0
ARL16	NM_001040025	coding	27	2	0	10.9648	22.1022	0
ARL17A	NM_016632	coding	2.34792	0	0	1.35396	0	0
ARL2	NM_001667	coding	132.264	7.86094	0	66.1541	106.994	0
ARL2	NM_001199745	coding	22.6692	8.55977e-05	0	12.36	0.00127003	0
ARL2BP	NM_012106	coding	35	0	0	8.16942	0	0
ARL2-SNX15	NR_037650	nonCoding	0.486246	0.705045	2.43598e-05	0.0967684	3.81826	0.000162844
ARL3	NM_004311	coding	43	0	0	5.44066	0	0
ARL4A	NM_001195396	coding	13.083	0	0	1.99901	0	0
ARL4A	NM_005738	coding	12.4972	0	0	1.90772	0	0
ARL4C	NM_005737	coding	175	5	1	21.4019	16.6401	4.10803
ARL4D	NM_001661	coding	28	1	0	8.65907	8.41556	0
ARL5A	NM_012097	coding	9.18052	0	0	1.42	0	0
ARL5B	NM_178815	coding	45	0	0	6.14584	0	0
ARL6IP1	NM_015161	coding	212	2	0	45.8988	11.7833	0
ARL6IP4	NM_018694	coding	54.943	5.34149	1.7805	19.5863	51.817	21.3206
ARL6IP4	NM_001002251	coding	131.96	12.6585	4.2195	47.8772	124.98	51.4241
ARL6IP4	NM_001002252	coding	18.8333	2.27678e-11	5.94543e-10	6.59858	2.17078e-10	6.99724e-09
ARL6IP4	NM_016638	coding	25.2643	2.00718e-06	1.10509e-08	9.3958	2.03134e-05	1.38052e-07
ARL6IP5	NM_006407	coding	101	1	1	23.2644	6.26817	7.7373
ARL6IP6	NM_152522	coding	18.9997	2	0	3.29548	9.43996	0
ARL8A	NM_138795	coding	53.9994	4	0	14.7458	29.7241	0
ARL8B	NM_018184	coding	68	0	1	11.1662	0	5.5159
ARMC1	NM_018120	coding	35	0	0	5.63964	0	0
ARMC10	NM_001161009	coding	6.81003	0	0	1.31991	0	0
ARMC10	NM_031905	coding	27.4006	0	0	5.09902	0	0
ARMC4	NM_018076	coding	13	0	0	1.78392	0	0
ARMC6	NM_001199196	coding	17.6478	0.510294	0.204118	3.47682	2.73579	1.3508
ARMC6	NM_033415	coding	49.3523	4.48971	1.79588	10.1642	25.1625	12.424
ARMC7	NM_024585	coding	10	0	0	2.30557	0	0
ARMC9	NM_025139	coding	39.0247	0	0	8.46021	0	0
ARMCX1	NM_016608	coding	84	1	0	19.3033	6.25348	0
ARMCX2	NM_177949	coding	134.944	3.69436e-16	0	23.2413	1.73148e-15	0
ARMCX2	NM_014782	coding	12.0564	2	0	2.11436	9.54466	0
ARMCX3	NM_016607	coding	24.6412	0	0	3.55765	0	0
ARMCX3	NM_177947	coding	53.9694	0	0	7.85683	0	0
ARMCX5	NM_001168482	coding	6.38623	0	0	1.16542	0	0
ARMCX5	NM_022838	coding	7.95303	0	0	1.45785	0	0
ARMCX5	NM_001168478	coding	16.5542	0	0	2.91148	0	0
ARMCX6	NM_019007	coding	3.79675	0	0	1.00705	0	0
ARNT	NM_001197325	coding	1.60583	0	1.15982	0.162663	0	3.94635
ARNT	NM_001668	coding	37.8364	0	0.715057	3.79498	0	2.40913
ARNT	NM_178427	coding	1.55781	0	1.12513	0.1577	0	3.82593
ARNT2	NM_014862	coding	78	0	0	5.82996	0	0
ARNTL2	NM_001248002	coding	81.9288	4.16354e-10	0	5.44967	7.53645e-10	0
ARNTL2	NM_001248003	coding	25.7122	0.691471	0	1.72647	1.26347	0
ARNTL2	NM_001248004	coding	32.1044	0.863359	0	2.16547	1.58471	0
ARNTL2	NM_001248005	coding	5.33351	1.44517	0	0.363552	2.68066	0
ARNTL2	NM_020183	coding	26.921	3.15151e-10	0	1.78056	5.67223e-10	0
ARPC1A	NM_006409	coding	62.7767	1.45425	0	19.1481	12.0708	0
ARPC1A	NM_001190996	coding	0.223335	1.54575	0	0.0682062	12.8463	0
ARPC1B	NM_005720	coding	126	8	2	40.3402	69.6991	21.5088
ARPC2	NM_005731	coding	234.87	4.80322	2.88193	81.6491	45.4387	33.6531
ARPC2	NM_152862	coding	26.1301	0.19678	0.118068	8.51035	1.74404	1.29169
ARPC3	NM_005719	coding	30	1	2	16.6346	15.089	37.2511
ARPC4	NM_001024960	coding	36.255	0.978567	0.489284	12.1719	8.94026	5.51784
ARPC4	NM_005718	coding	25.294	4.02009e-07	2.01005e-07	6.29032	2.72058e-06	1.67911e-06
ARPC4	NM_001198780	coding	37.4929	1.01198	0.505989	12.5961	9.25185	5.71014
ARPC4-TTLL3	NM_001198793	coding	11.344	0	0.0152413	1.39464	0	0.0629416
ARPC5	NM_005717	coding	209.971	4	0	49.5524	25.6883	0
ARPC5L	NM_030978	coding	63	10	2	30.1272	130.133	32.1268
ARPP19	NM_006628	coding	141	1	1	13.3889	2.58401	3.18965
ARRB1	NM_004041	coding	11.6465	0.460932	0.921864	0.758934	0.817365	2.01788
ARRB1	NM_020251	coding	48.3535	0.539068	1.07814	3.161	0.958983	2.3675
ARRB2	NM_199004	coding	6.72144	1.54403	0	1.75807	10.99	0
ARRB2	NM_004313	coding	2.10135	0.482716	0	0.536742	3.35529	0
ARRB2	NM_001257330	coding	0.845242	0.194166	0	0.211922	1.32477	0
ARRB2	NM_001257331	coding	2.64568	0.607758	0	0.678963	4.24433	0
ARRDC1	NM_152285	coding	42	1	0	12.8829	8.3471	0
ARRDC2	NM_001025604	coding	54.8738	1.18324	0.394413	10.6524	6.25062	2.57188
ARRDC2	NM_015683	coding	0.126136	1.81676	0.605587	0.0247013	9.68166	3.98361
ARRDC3	NM_020801	coding	137	1	0	16.1386	3.20564	0
ARRDC4	NM_183376	coding	20	0	11	2.41045	0	44.5327
ARSB	NM_000046	coding	33.9901	0	1	2.74432	0	2.71207
ARSD	NM_001669	coding	11	0	0	1.04029	0	0
ARSJ	NM_024590	coding	76	1	0	7.96335	2.85136	0
ARSK	NM_198150	coding	25	1	0	3.66342	3.98764	0
ARTN	NM_001136215	coding	7.56842	0	0	2.06673	0	0
ARV1	NM_022786	coding	12	0	0	4.07058	0	0
ASAH1	NM_177924	coding	12.1432	0	0	2.27357	0	0
ASAH1	NM_004315	coding	16.8568	0	0	3.23896	0	0
ASAH2B	NM_001079516	coding	2	0	0	1.50357	0	0
ASAP1	NM_018482	coding	36.5003	0	2.75474	2.86534	0	7.26405
ASAP1	NM_001247996	coding	16.4997	0	1.24526	1.27444	0	3.23088
ASAP2	NM_001135191	coding	59.6194	1.52664	0	5.23529	3.64803	0
ASAP2	NM_003887	coding	121.381	0.473365	0	10.407	1.10443	0
ASAP3	NM_017707	coding	44.6545	0.420318	0	5.30106	1.35783	0
ASAP3	NM_001143778	coding	16.3455	0.579682	0	1.95319	1.88498	0
ASB1	NM_001040445	coding	209	1	0	14.9926	1.9521	0
ASB13	NM_024701	coding	23.2469	0	0	4.17852	0	0
ASB3	NM_016115	coding	7.20068	0.000626086	0	1.54668	0.00365957	0
ASB6	NM_017873	coding	35.6884	0	0	3.78478	0	0
ASB7	NM_198243	coding	12.3688	0	0	1.2216	0	0
ASB7	NM_024708	coding	9.63115	0	0	2.69302	0	0
ASB8	NM_024095	coding	18	0	0	3.37657	0	0
ASB9	NM_001031739	coding	4.2402	0	0	1.22187	0	0
ASCC1	NM_001198798	coding	14.1374	0	0	2.58281	0	0
ASCC1	NM_001198799	coding	12.5152	0	0	2.09727	0	0
ASCC2	NM_032204	coding	22.9837	0.0953006	0.270019	3.99073	0.450295	1.57487
ASCC2	NM_001242906	coding	9.01627	5.9047	16.73	1.70307	30.351	106.15
ASCC3	NM_006828	coding	62.45	2	3	4.03199	3.51387	6.50618
ASF1A	NM_014034	coding	22	1	0	4.29969	5.31845	0
ASF1B	NM_018154	coding	43	0	0	12.1763	0	0
ASH1L	NM_018489	coding	99	0	1	4.12148	0	1.39842
ASH1L-AS1	NR_027023	nonCoding	6	0	0	1.49745	0	0
ASH2L	NM_001261832	coding	15.1951	0	0	2.51965	0	0
ASH2L	NM_004674	coding	14.1902	0	0	2.35462	0	0
ASIC1	NM_001095	coding	9.11932	0	0	1.15923	0	0
ASL	NM_001024946	coding	4.85036	0	0	1.19954	0	0
ASL	NM_000048	coding	24.8274	0	0	6.28592	0	0
ASNA1	NM_004317	coding	82	2	3	31.4012	20.8417	38.5898
ASNS	NM_001178075	coding	22.6383	0	0	5.53441	0	0
ASNSD1	NM_019048	coding	31	1	1	6.14938	5.39809	6.66328
ASPH	NM_001164751	coding	6.9475	0.629731	0	0.940464	2.31974	0
ASPH	NM_001164752	coding	0.000653772	1.37027	0	8.99147e-05	5.12838	0
ASPH	NM_001164750	coding	3.50991	0.860529	1.72106	0.333806	2.22707	5.49809
ASPH	NM_004318	coding	32.9329	0.139471	0.278942	3.01786	0.347796	0.858624
ASPH	NM_032466	coding	124.71	2.12542e-17	0	16.1973	7.512e-17	0
ASPHD1	NM_181718	coding	12	1	3	3.97969	9.02481	33.4201
ASPM	NM_018136	coding	116.178	6.10265e-13	0	5.23019	7.47623e-13	0
ASPM	NM_001206846	coding	51.8222	1	0	4.14177	2.1749	0
ASPSCR1	NM_024083	coding	29.9395	0.180617	0	7.96273	1.30721	0
ASS1	NM_000050	coding	5.06043	0.316276	0.948827	1.34223	2.28285	8.45369
ASS1	NM_054012	coding	26.9396	1.68372	5.05117	7.39353	12.5748	46.5663
ASTN2	NM_001184735	coding	11.3534	0	0	1.58593	0	0
ASUN	NM_018164	coding	48	0	0	7.90589	0	0
ASXL1	NM_015338	coding	285.632	0	3	19.8902	0	7.01732
ASXL1	NM_001164603	coding	3.36757	0	0	1.54268	0	0
ASXL2	NM_018263	coding	64	0	0	4.37281	0	0
ATAD1	NM_032810	coding	58	0	0	9.37033	0	0
ATAD2	NM_014109	coding	115	2	0	10.131	4.79463	0
ATAD3A	NM_001170536	coding	4.50204	1.93449	0.967245	0.946287	11.065	6.82918
ATAD3A	NM_001170535	coding	9.79441	0.0615442	0.0307721	1.91882	0.328105	0.202503
ATAD3A	NM_018188	coding	17.7036	0.0039661	0.00198305	3.27954	0.0199934	0.0123397
ATAD3B	NM_031921	coding	15	2	1	3.02198	10.9648	6.76735
ATAD3C	NM_001039211	coding	3	1	0	0.381056	3.45651	0
ATAD5	NM_024857	coding	24	4	0	1.88465	8.54769	0
ATAT1	NM_001031722	coding	5.28622	0	0	1.50123	0	0
ATE1	NM_001001976	coding	11.9997	0	0	2.66266	0	0
ATE1	NM_007041	coding	6.00033	0	0	1.33144	0	0
ATF1	NM_005171	coding	30	0	0	5.87024	0	0
ATF2	NM_001880	coding	47.7717	0.0637695	0	5.60729	0.203688	0
ATF2	NM_001256092	coding	20.8411	0.201718	0	2.50443	0.659635	0
ATF3	NM_001030287	coding	6.50446	0.782446	0	1.65882	5.43017	0
ATF3	NM_001040619	coding	8.74995	1.91691e-05	0	1.79678	0.000107118	0
ATF3	NM_001674	coding	16.0139	0.0183435	0	3.78288	0.117917	0
ATF3	NM_001206488	coding	4.35291	0.0316723	0	1.03979	0.20588	0
ATF3	NM_001206484	coding	6.54357	0.0476117	0	1.57613	0.312077	0
ATF4	NM_001675	coding	88.3136	2.71078e-07	1.20479e-07	21.4086	1.78824e-06	9.81052e-07
ATF4	NM_182810	coding	343.686	9	4	118.636	84.5408	46.3802
ATF5	NM_001193646	coding	7.11782	2.97094	0	1.68546	19.1441	0
ATF5	NM_012068	coding	10.8822	0.0290638	0	2.34464	0.170405	0
ATF6	NM_007348	coding	172	7	0	11.1726	12.3735	0
ATF6B	NM_001136153	coding	2.92469	2.16847	0	0.549896	11.0949	0
ATF6B	NM_004381	coding	73.0754	1.83153	0	13.6923	9.33876	0
ATF7	NM_001206683	coding	3.23419	0	0	2.0429	0	0
ATF7IP	NM_018179	coding	31	0	1	3.26006	0	3.5325
ATG12	NM_004707	coding	47.0555	0	0.0311609	5.32802	0	0.118518
ATG13	NM_014741	coding	36.954	0	0.151688	3.11604	0	0.429646
ATG13	NM_001205122	coding	32.6366	0	0.49231	2.81891	0	1.42835
ATG14	NM_014924	coding	50	0	0	5.16725	0	0
ATG16L1	NM_017974	coding	13.0062	0	0	1.90418	0	0
ATG16L2	NM_033388	coding	31	0	0	7.08397	0	0
ATG2A	NM_015104	coding	61	1	2	4.69168	2.093	5.1671
ATG2B	NM_018036	coding	69	0	0	3.04725	0	0
ATG3	NM_022488	coding	31	1	0	12.2344	10.7397	0
ATG4A	NM_052936	coding	12	0	0	2.54191	0	0
ATG4B	NM_013325	coding	34.1145	0	0	5.81221	0	0
ATG4C	NM_032852	coding	10	0	0	1.79943	0	0
ATG4D	NM_032885	coding	39	0	0	10.0825	0	0
ATG5	NM_004849	coding	29	0	0	4.38187	0	0
ATG7	NM_006395	coding	24.4997	0	0.623413	2.37753	0	2.03217
ATG7	NM_001136031	coding	0.342949	0	1.37659	0.0338232	0	4.56046
ATG9A	NM_024085	coding	1.64345	0.663743	0	0.21649	2.37932	0
ATG9A	NM_001077198	coding	80.3566	0.336257	1	10.4394	1.18877	4.36389
ATHL1	NM_025092	coding	31	0	0	4.64967	0	0
ATIC	NM_004044	coding	27	0	2	6.35051	0	15.8013
ATL2	NM_001135673	coding	15.5944	0	0	2.64585	0	0
ATL2	NM_022374	coding	21.365	0	0	3.11123	0	0
ATL3	NM_015459	coding	176	1	0	38.2398	5.91253	0
ATM	NM_000051	coding	190	0	0	7.08385	0	0
ATMIN	NM_015251	coding	53	1	0	5.33883	2.7412	0
ATOX1	NM_004045	coding	21	1	0	21.05	27.2774	0
ATP10A	NM_024490	coding	33	1	0	3.09046	2.54847	0
ATP10D	NM_020453	coding	170	5	0	12.7218	10.1822	0
ATP11A	NM_032189	coding	5.91353	0	0.537593	0.330589	0	1.00952
ATP11B	NM_014616	coding	94	6	0	6.29447	10.9333	0
ATP11C	NM_173694	coding	19.7865	0	0	1.58527	0	0
ATP11C	NM_001010986	coding	46.2135	0	0	3.76721	0	0
ATP13A1	NM_020410	coding	30	0	0	3.80563	0	0
ATP13A2	NM_022089	coding	12.4208	0.0203151	0	1.52359	0.0678121	0
ATP13A2	NM_001141973	coding	30.3345	0.024426	0	3.73497	0.0818412	0
ATP13A2	NM_001141974	coding	5.2447	0.955259	0	0.695931	3.44935	0
ATP13A3	NM_024524	coding	254	2	0	16.9899	3.64047	0
ATP1A1	NM_001160233	coding	19.9488	1.05329e-06	0	2.59713	3.7316e-06	0
ATP1A1	NM_000701	coding	420.306	7.99999	0	55.0707	28.5242	0
ATP1A1	NM_001160234	coding	255.747	1.35039e-05	0	35.075	5.03984e-05	0
ATP1B1	NM_001677	coding	153	0	0	34.0888	0	0
ATP1B2	NM_001678	coding	2	1	0	0.294217	4.0032	0
ATP1B3	NM_001679	coding	27	2	0	7.14218	14.3968	0
ATP2A2	NM_001681	coding	37.0335	0	0	4.17876	0	0
ATP2A2	NM_170665	coding	154.967	1	0	9.1363	1.60436	0
ATP2B1	NM_001682	coding	157.968	0.750389	0	11.4221	1.4765	0
ATP2B4	NM_001684	coding	213.666	2.18589	0	11.9803	3.33527	0
ATP2B4	NM_001001396	coding	18.3337	0.814105	0	1.00746	1.21739	0
ATP2C1	NM_014382	coding	10.6442	0	0	1.05744	0	0
ATP2C1	NM_001001487	coding	17.0529	0	0	2.41304	0	0
ATP2C1	NM_001001486	coding	48.2058	0	0	6.76267	0	0
ATP5A1	NM_004046	coding	248.303	2.90763	0.413183	63.3245	20.1789	3.53957
ATP5A1	NM_001257334	coding	13.7829	1.01314e-10	2.28948	3.64003	7.2812e-10	20.3105
ATP5A1	NM_001001935	coding	17.2218	0.468007	0.0665053	4.23134	3.12912	0.548876
ATP5A1	NM_001001937	coding	63.6763	1.62328	0.230674	16.0473	11.1324	1.95272
ATP5B	NM_001686	coding	804	10	2	213.832	72.3748	17.8676
ATP5C1	NM_005174	coding	33.7559	4.16576	1.6663	14.9197	50.1043	24.7391
ATP5C1	NM_001001973	coding	143.244	0.834244	0.333698	61.268	9.71004	4.79435
ATP5D	NM_001687	coding	2.30916	3.12677e-08	0	1.13642	4.18745e-07	0
ATP5D	NM_001001975	coding	20.6908	1	0	14.4885	19.0552	0
ATP5E	NM_006886	coding	108.918	3	1	121.612	91.1526	37.5056
ATP5EP2	NR_002162	nonCoding	8	0	0	10.6558	0	0
ATP5F1	NM_001688	coding	66	1	0	15.3979	6.34872	0
ATP5G1	NM_001002027	coding	33.9773	1.99278	0.996388	28.914	46.1475	28.4818
ATP5G2	NM_005176	coding	60	0.999999	0	33.2691	15.089	0
ATP5G3	NM_001689	coding	192.103	43.8579	26.4619	35.681	221.677	165.098
ATP5G3	NM_001002258	coding	4.47211	2.14125	0.538068	0.80325	10.4659	3.24634
ATP5H	NM_001003785	coding	1.36774e-07	1.99519	0	1.21894e-07	48.3876	0
ATP5H	NM_006356	coding	73	0.0048087	1	57.5274	0.103122	26.471
ATP5I	NM_007100	coding	25.1989	0.00066874	0	33.84	0.0244386	0
ATP5J	NM_001003697	coding	28.0381	0	1.99998	20.7603	0	49.7425
ATP5J	NM_001003703	coding	24.4018	0	1.01256e-14	9.22909	0	1.2864e-13
ATP5J2	NM_001003713	coding	150.064	3.41141	0.852854	149.201	92.2997	28.4832
ATP5J2	NM_004889	coding	1.69507	0.588585	0.147146	1.62595	15.3639	4.74121
ATP5J2-PTCD1	NM_001198879	coding	24.3699	0	0	2.15696	0	0
ATP5L	NM_006476	coding	106.77	5	0.870287	39.1143	49.8455	10.7095
ATP5O	NM_001697	coding	59	2	1	35.8806	33.0984	20.428
ATP5SL	NM_001167870	coding	8.51188	0	0	2.81527	0	0
ATP5SL	NM_018035	coding	12.2744	0	0	3.48579	0	0
ATP5SL	NM_001167869	coding	3.8173	0	0	1.19713	0	0
ATP5SL	NM_001167871	coding	25.9781	0	0	7.74076	0	0
ATP6AP1	NM_001183	coding	114	0	0	26.6216	0	0
ATP6AP1L	NM_001017971	coding	2	0	0	1.29331	0	0
ATP6AP2	NM_005765	coding	99	1	1	23.8342	6.55141	8.08692
ATP6V0A1	NM_001130021	coding	14.5573	0	0	1.72354	0	0
ATP6V0A1	NM_005177	coding	18.0221	0	0	2.14308	0	0
ATP6V0A2	NM_012463	coding	57	3	0	4.27143	6.11772	0
ATP6V0B	NM_004047	coding	47.0417	0.33041	0.0826025	22.5618	4.31235	1.33077
ATP6V0B	NM_001039457	coding	10.9583	3.66959	0.917398	5.52041	50.3057	15.5241
ATP6V0C	NM_001198569	coding	2.99751	1.99834	0.999169	1.43905	26.1069	16.1129
ATP6V0D1	NM_004691	coding	26	2	0	7.63131	15.9745	0
ATP6V0E1	NM_003945	coding	206	1	0	114.483	15.1232	0
ATP6V0E2	NM_145230	coding	13	1	0	2.33669	4.89133	0
ATP6V0E2-AS1	NR_027040	nonCoding	10	0	0	1.59715	0	0
ATP6V1A	NM_001690	coding	131	0	1	13.9803	0	3.5848
ATP6V1B2	NM_001693	coding	91	0	0	14.6534	0	0
ATP6V1C1	NM_001695	coding	85	0	0	7.30435	0	0
ATP6V1D	NM_015994	coding	54	2	1	14.6561	14.7715	9.11682
ATP6V1E1	NM_001696	coding	117.856	0.0537674	0	41.1165	0.510452	0
ATP6V1E1	NM_001039367	coding	0.0151948	1.37815	0	0.00566384	13.9792	0
ATP6V1E1	NM_001039366	coding	1.12912	0.568081	0	0.413336	5.65904	0
ATP6V1E2	ENST00000505245.2	coding	5	0	0	1.05005	0	0
ATP6V1F	NM_004231	coding	37	2.98534	0	24.7423	54.3253	0
ATP6V1G1	NM_004888	coding	67	3	0	20.3855	24.8392	0
ATP6V1H	NM_213620	coding	8.8014	0	0	2.07411	0	0
ATP6V1H	NM_015941	coding	5.74833	0	0	1.28894	0	0
ATP7A	NM_000052	coding	29	0	0	1.67469	0	0
ATP8B1	NM_005603	coding	90	0	0	7.4305	0	0
ATP8B2	NM_020452	coding	40.9995	0	0	3.43062	0	0
ATP8B3	NM_001178002	coding	1.54352e-14	0.658312	0	1.51195e-15	1.7548	0
ATP9A	NM_006045	coding	22	0	1	1.42264	0	2.17216
ATP9B	NM_198531	coding	27	0	0	3.03752	0	0
ATPAF1	NM_022745	coding	15.3124	0	0	4.10366	0	0
ATPAF1	NM_001256418	coding	7.73203	0	0	2.128	0	0
ATPAF1	NM_001042546	coding	3.8595	0	0	1.16418	0	0
ATPAF2	NM_145691	coding	9	2	0	2.84245	17.189	0
ATPBD4	NM_080650	coding	6	0	1	1.43673	0	8.04346
ATPIF1	NM_178190	coding	6.5008	3.99944	0.00159221	5.16445	86.4622	0.042489
ATPIF1	NM_016311	coding	35.127	0.000562064	0.998408	31.8263	0.013858	30.3859
ATR	NM_001184	coding	56	0	0	3.32678	0	0
ATRAID	NM_080592	coding	3.93203	5.66385e-07	5.66385e-07	1.53207	6.00542e-06	7.41297e-06
ATRAID	NM_016085	coding	20.1738	0.00109432	0.00109432	9.173	0.0135406	0.0167142
ATRAID	NM_001170795	coding	47.8942	0.998905	0.998905	25.0278	14.2048	17.5341
ATRIP	NM_001271022	coding	1.60877	0.908681	0	0.328157	5.04394	0
ATRIP	NM_032166	coding	11.0239	0.070085	0	2.13409	0.36921	0
ATRN	NM_139321	coding	112.969	1.71773e-19	0	6.39783	2.64729e-19	0
ATRN	NM_001207047	coding	1.27267	0.993139	0	0.174056	3.69619	0
ATRNL1	NM_001276282	coding	6.95474	0	7	1.88445	0	63.7119
ATRX	NM_000489	coding	68.3899	1.50826	0.377065	2.99735	1.79883	0.555111
ATRX	NM_138270	coding	99.6103	2.49174	0.622935	4.41061	3.0024	0.926523
ATXN1	NM_001128164	coding	26.1473	0	0	1.21059	0	0
ATXN10	NM_013236	coding	120.2	0.154992	0	17.693	0.620838	0
ATXN10	NM_001167621	coding	22.8005	2.84501	0	3.5615	12.0932	0
ATXN1L	NM_001137675	coding	69	0	0	4.28879	0	0
ATXN2	NM_002973	coding	17	1	0	1.77218	2.83681	0
ATXN2L	NM_007245	coding	14.6338	0.000202762	0.000202762	1.62579	0.000613004	0.000756679
ATXN2L	NM_148416	coding	3.14151	0.375423	0.375423	0.406939	1.32337	1.63354
ATXN2L	NM_148415	coding	2.33444	0.278975	0.278975	0.300567	0.97745	1.20654
ATXN3	NM_004993	coding	23.1592	0	0	1.63973	0	0
ATXN7	NM_000333	coding	15.3025	0.0679392	0.135878	1.03817	0.125428	0.309652
ATXN7	NM_001177387	coding	24.2426	0.932061	1.86412	1.73498	1.81522	4.48134
ATXN7L2	NM_153340	coding	16	0	0	3.29246	0	0
ATXN7L3	NM_001098833	coding	109.203	1.14182	0	14.8978	4.23888	0
ATXN7L3	NM_020218	coding	4.79645	0.858184	0	0.65054	3.16741	0
ATXN7L3B	NM_001136262	coding	89	0	1	11.8481	0	4.47175
AUP1	NM_181575	coding	151	1	0	46.1728	8.32107	0
AURKA	NM_198437	coding	59.7365	1.59972	4.3307e-21	13.8509	10.0937	3.37299e-20
AURKA	NM_198436	coding	48.872	0.133225	1.50987e-06	10.7713	0.799029	1.1178e-05
AURKA	NM_198435	coding	48.6833	1.15766	3.13396e-21	11.2137	7.25639	2.42484e-20
AURKA	NM_198433	coding	25.6491	0.000173289	3	4.93612	0.000907516	19.3934
AURKA	NM_003600	coding	12.7608	0.0112644	2.73313e-07	2.67418	0.0642378	1.92394e-06
AURKAIP1	NM_017900	coding	33.7251	0.000241232	0.000241232	16.6978	0.00325022	0.004012
AURKAIP1	NM_001127230	coding	34.1394	3.98395	3.98395	20.6083	65.4441	80.7828
AURKAPS1	NR_001587	nonCoding	17	0	0	5.42147	0	0
AURKB	NM_001256834	coding	33.0654	0.944724	0	13.2414	10.2952	0
AVEN	NM_020371	coding	8	0	0	2.56128	0	0
AVL9	NM_015060	coding	37	0	0	7.70765	0	0
AVPI1	NM_021732	coding	29	1	0	10.2118	9.58238	0
AXIN1	NM_181050	coding	19.0261	0.812702	4.87621	2.62555	3.0519	22.6032
AXIN1	NM_003502	coding	28.9738	0.187298	1.12379	3.88032	0.682598	5.0555
AXIN2	NM_004655	coding	7	0	1	0.810765	0	3.89059
AXL	NM_021913	coding	1788.57	15.5978	0	185.074	43.9211	0
AXL	NM_001699	coding	498.374	0.402185	0	51.8653	1.13898	0
AZGP1	NM_001185	coding	0	1	0	0	10.5444	0
AZI1	NM_001009811	coding	6.52207	0.815258	0.815258	0.910535	3.09725	3.82318
AZI2	NM_001271650	coding	21.5781	0	2.31054e-19	3.05336	0	1.09824e-18
AZI2	NM_022461	coding	10.9587	0	5.76185e-19	1.57987	0	2.79026e-18
AZI2	NM_001134432	coding	0.236709	0	0.93219	0.080295	0	10.6218
AZI2	NM_001134433	coding	15.2265	0	1.06781	5.17939	0	12.2009
AZIN1	NM_015878	coding	125.304	0.315886	0	14.126	0.969066	0
AZIN1	NM_148174	coding	85.6959	1.68411	0	9.99646	5.34599	0
B2M	NM_004048	coding	479	14	5	237.882	189.201	83.4092
B3GALNT2	NM_152490	coding	70.7784	0	2.25662e-19	7.30688	0	7.82542e-19
B3GALNT2	NM_001277155	coding	5.22164	0	3	1.32409	0	25.5535
B3GALT4	NM_003782	coding	18	0	0	5.23308	0	0
B3GALT6	NM_080605	coding	14	0	0	2.45785	0	0
B3GAT3	NM_012200	coding	52	1	0	15.5323	8.12838	0
B3GNT1	NM_006876	coding	21	0	0	4.97269	0	0
B3GNT2	NM_006577	coding	40	0	0	7.13227	0	0
B3GNT3	NM_014256	coding	12	1	0	2.16249	4.90392	0
B3GNT5	NM_032047	coding	39	0	0	4.63654	0	0
B3GNT9	NM_033309	coding	15	0	0	2.71811	0	0
B3GNTL1	NM_001009905	coding	22	2	0	7.79728	19.2895	0
B4GALNT4	NM_178537	coding	16	0	2	2.2706	0	9.53386
B4GALT1	NM_001497	coding	130	4	1	15.1754	12.7065	3.92116
B4GALT2	NM_030587	coding	40.7975	0.983074	0	9.97381	6.5401	0
B4GALT2	NM_001005417	coding	41.8072	1.0074	0	10.2258	6.70529	0
B4GALT3	NM_001199873	coding	29.1545	0.394616	0	5.9174	2.17957	0
B4GALT3	NM_003779	coding	44.7261	0.605384	0	9.15755	3.37302	0
B4GALT4	NM_003778	coding	9.39428	0	0	2.0366	0	0
B4GALT5	NM_004776	coding	165	1	0	17.1096	2.8218	0
B4GALT6	NM_004775	coding	16	0	0	1.62913	0	0
B4GALT7	NM_007255	coding	54	0	1	15.3265	0	9.53386
B9D1	NM_015681	coding	13	0	0	6.86654	0	0
B9D2	NM_030578	coding	4	0	0	1.90171	0	0
BABAM1	NM_001033549	coding	40.2456	1.28463	0	13.5954	11.8093	0
BABAM1	NM_014173	coding	127.754	4.71537	0	44.3176	44.5129	0
BACE1	NM_012104	coding	12.8343	0	0	1.07592	0	0
BACE1	NM_001207048	coding	17.6005	0	0	1.6562	0	0
BACE2	NM_012105	coding	54.8613	0	0	8.98466	0	0
BACE2	NM_138992	coding	16.5091	0	0	2.8655	0	0
BACE2-IT1	ENST00000433378.1	nonCoding	2	0	0	2.56631	0	0
BACH1	NM_001186	coding	116.464	1.44201	0	10.12	3.40977	0
BACH1	NM_206866	coding	101.454	0.480276	0	8.6201	1.11046	0
BAD	NM_032989	coding	59.9993	2.99997	0	30.3191	41.2532	0
BAG1	NM_004323	coding	28	1	1	3.54458	3.4449	4.25232
BAG1	NM_001172415	coding	28	1	1	3.54458	3.4449	4.25232
BAG2	NM_004282	coding	74	0	0	17.6765	0	0
BAG3	NM_004281	coding	13	2	0	2.4804	10.3843	0
BAG4	NM_004874	coding	19.9904	0	0	2.19502	0	0
BAG5	NM_004873	coding	19.3178	0	0	1.94513	0	0
BAG5	NM_001015048	coding	23.6357	0	0	2.38973	0	0
BAG6	NM_001199697	coding	26.1815	0.00284626	0	4.13309	0.0122271	0
BAG6	NM_001199698	coding	117.769	0.042024	0.470461	15.9157	0.154548	2.13568
BAG6	NM_001098534	coding	102.163	11.9412	0.374122	13.7423	43.7103	1.69043
BAG6	NM_004639	coding	47.9054	0.00348753	0.039043	6.15345	0.0121905	0.16846
BAG6	NM_080702	coding	48.1521	0.0059984	0.0671522	6.25397	0.0212005	0.292967
BAG6	NM_080703	coding	62.8288	0.00439678	0.0492221	8.10861	0.0154416	0.213386
BAHCC1	NM_001080519	coding	21	3	0	1.01144	3.932	0
BAHD1	NM_014952	coding	22	0	0	2.3826	0	0
BAIAP2	NM_001144888	coding	3.30574	0	1	0.490127	0	4.98033
BAIAP2	NM_017450	coding	5.98713	1	0	0.92054	4.18402	0
BAIAP2-AS1	NR_026857	nonCoding	12	0	0	1.33046	0	0
BAIAP2L1	NM_018842	coding	57	1	0	7.61292	3.63451	0
BAIAP3	NM_001199099	coding	0.640518	0	0.32555	0.0699398	0	1.19407
BAIAP3	NM_001199097	coding	11.9699	0	0.131247	1.28301	0	0.472552
BAIAP3	NM_001199098	coding	0.543928	0	0.276457	0.0591951	0	1.01062
BAK1	NM_001188	coding	136	1	0	30.3978	6.08238	0
BANF1	NM_001143985	coding	33.7927	4.30209	2.76957	15.1269	52.4056	41.6447
BANF1	NM_003860	coding	126.207	3.69791	0.230427	53.6999	42.817	3.29338
BANP	NM_017869	coding	0.0245212	6.85355e-15	2.08974	0.00541661	4.11975e-14	15.5059
BANP	NM_001173542	coding	0.202669	0.537702	0.0748656	0.0418278	3.01988	0.519015
BANP	NM_079837	coding	3.72754	1.63004e-15	0.497022	0.799609	9.51536e-15	3.58138
BANP	NM_001173540	coding	2.53771	1.10974e-15	0.338374	0.54012	6.42745e-15	2.41915
BANP	NM_001173539	coding	12.1479	1.4623	1.83967e-10	2.55885	8.38208	1.30168e-09
BAP1	NM_004656	coding	270	2	1	36.9265	7.44345	4.59402
BARD1	NM_000465	coding	30	0	0	5.66883	0	0
BASP1	NM_001271606	coding	1.65988	4.9578	3.96624	0.474965	38.6051	38.1226
BASP1	NM_006317	coding	134.34	0.042199	0.0337592	34.8775	0.298135	0.294409
BATF	NM_006399	coding	2	0	0	1.0429	0	0
BATF3	NM_018664	coding	11	0	1	5.49624	0	16.7839
BAX	NM_004324	coding	11.0002	0	0	6.05155	0	0
BAX	NM_138761	coding	19.999	0	0	12.1022	0	0
BAZ1A	NM_182648	coding	21.4636	0.687449	0	1.77715	1.54893	0
BAZ1A	NM_013448	coding	63.5364	0.312551	0	5.17675	0.692987	0
BAZ1B	NM_032408	coding	98	2	6	7.85547	4.36261	16.1553
BAZ2A	NM_013449	coding	109	2	1	5.9803	2.98605	1.84296
BAZ2B	NM_013450	coding	42	0	1	2.52755	0	2.02148
BBC3	NM_001127241	coding	7.98182	0	0	2.54052	0	0
BBC3	NM_001127242	coding	9.01524	0	0	3.27573	0	0
BBIP1	NM_001195306	coding	12.6023	0	0	3.00303	0	0
BBS1	NM_024649	coding	12	0	0	1.74539	0	0
BBS10	NM_024685	coding	22	0	0	3.00967	0	0
BBS2	NM_031885	coding	29	0	0	5.05145	0	0
BBS4	NM_033028	coding	5.98149	0	0	1.17371	0	0
BBS5	NM_152384	coding	2	0	1	0.310526	0	5.21538
BBS7	NM_018190	coding	20	0	0	3.74601	0	0
BBS9	NM_001033604	coding	8.59546	0	0	1.07644	0	0
BBX	NM_001276286	coding	0.395484	3.96865	0	0.0241832	6.60385	0
BBX	NM_001142568	coding	173.419	0.011903	0	9.41873	0.0175923	0
BBX	NM_020235	coding	128.185	0.0194508	0	7.03208	0.0290372	0
BCAM	NM_005581	coding	10	0	0	1.99823	0	0
BCAP29	NM_001008405	coding	0.589133	0.695165	0	0.0500212	1.6062	0
BCAP29	NM_018844	coding	31.3792	0.0899645	0	2.55541	0.19937	0
BCAP31	NM_001256447	coding	22.4028	9.14603e-05	4.57301e-05	6.68355	0.000742519	0.000458275
BCAP31	NM_005745	coding	6.60801	0.148084	0.0740418	2.2923	1.3979	0.862772
BCAP31	NM_001139441	coding	82.635	1.85182	0.925912	30.1824	18.406	11.36
BCAP31	NM_001139457	coding	15.3543	5.4608e-07	2.7304e-07	4.12617	3.99341e-06	2.46469e-06
BCAR1	NM_001170718	coding	22.928	0.00891437	0	3.44212	0.0364183	0
BCAR1	NM_001170720	coding	6.00101e-07	1.91834	0	1.00529e-07	8.74507	0
BCAR1	NM_001170717	coding	9.08346	0.00577977	0	1.35167	0.0234045	0
BCAR3	NM_001261409	coding	13.0829	0.309542	0	1.999	1.28706	0
BCAR3	NM_001261408	coding	10.5691	0.250064	0	1.60788	1.03523	0
BCAR3	NM_003567	coding	91.341	0.440394	0	14.0572	1.84435	0
BCAS2	NM_005872	coding	25	2	0	9.41901	20.5053	0
BCAS4	NM_198799	coding	18.9796	0	0	7.47238	0	0
BCAT1	NM_005504	coding	32.5178	0	0.0661128	1.64796	0	0.112546
BCAT2	NM_001190	coding	3.35418	0	0	1.02821	0	0
BCAT2	NM_001164773	coding	4.04043	0	0	1.49696	0	0
BCCIP	NM_078469	coding	8.25621	0	0	1.72209	0	0
BCCIP	NM_078468	coding	45.5753	5	0	17.8858	53.3974	0
BCCIP	NM_016567	coding	11.1685	1.60877e-38	0	3.79113	1.48607e-37	0
BCKDHA	NM_001164783	coding	1.14863	0.520722	1.04144	0.317909	3.92193	9.68229
BCKDHA	NM_000709	coding	20.8514	0.479278	0.958557	5.76134	3.60368	8.89662
BCKDK	NM_001122957	coding	11.6227	0	0.0597936	2.56508	0	0.443269
BCKDK	NM_001271926	coding	5.07787	0	0.453884	1.16799	0	3.50689
BCKDK	NM_005881	coding	7.29944	0	0.486322	1.68136	0	3.76282
BCL10	NM_003921	coding	63	0	0	9.94858	0	0
BCL2L1	NM_138578	coding	475.29	0.113814	0.0455256	91.0396	0.593249	0.292918
BCL2L1	NM_001191	coding	102.707	4.88619	1.95447	21.2419	27.5001	13.5782
BCL2L12	NM_138639	coding	23.1032	0	0.480183	6.1048	0	4.2621
BCL2L12	NM_001040668	coding	2.89676	0	0.519817	0.766681	0	4.62137
BCL2L13	NM_001270726	coding	11.7505	0.00143225	0.0028645	1.16099	0.00385089	0.00950692
BCL2L13	NM_001270731	coding	26.189	0.000533489	0.00106698	2.53594	0.00140577	0.00347052
BCL2L13	NM_001270733	coding	0.71396	0.928149	1.8563	0.0805056	2.848	7.03103
BCL2L2	NM_001199839	coding	18.8565	0.649194	0.781743	2.59629	2.43241	3.61556
BCL2L2	NM_004050	coding	10.1895	0.350806	0.422431	1.38544	1.298	1.92935
BCL2L2-PABPN1	NM_001199864	coding	65.4098	0	2.79583	15.0524	0	21.6118
BCL3	NM_005178	coding	5	1	0	1.31482	7.15594	0
BCL6	NM_001706	coding	8.54554	0	0	1.1743	0	0
BCL7A	NM_020993	coding	15.2026	0	0	2.0064	0	0
BCL7A	NM_001024808	coding	19.7974	0	0	2.6579	0	0
BCL7B	NM_001707	coding	28.1223	0.0113183	0.0456948	8.05645	0.0882352	0.439722
BCL7B	NM_001197244	coding	0.00593323	1.97022	7.9543	0.00188848	17.065	85.0438
BCL7C	NM_004765	coding	8	1	0	4.5703	15.5462	0
BCL9	NM_004326	coding	15	0	1	1.17152	0	2.62348
BCL9L	NM_182557	coding	52	4	1	3.29395	6.89515	2.12781
BCLAF1	NM_001077440	coding	36.4034	2.32148e-10	0.0681348	2.50966	4.35521e-10	0.157783
BCLAF1	NM_001077441	coding	0.00522238	2.92272	0.907861	0.000379571	5.78072	2.21647
BCLAF1	NM_014739	coding	113.591	0.0772791	0.0240046	7.66605	0.141925	0.0544175
BCORL1	NM_021946	coding	6	0	2	0.412655	0	4.62045
BCR	NM_004327	coding	75.1559	0	0	5.31815	0	0
BCR	NM_021574	coding	16.8441	0	0	1.21507	0	0
BCS1L	NM_001079866	coding	17.0724	0	0	5.75536	0	0
BCYRN1	NR_001568	nonCoding	12	1	4	30.7957	69.836	344.816
BDH1	NM_004051	coding	24.9944	0	0	3.60972	0	0
BDH2	NM_020139	coding	14	0	0	2.35011	0	0
BDKRB2	NM_000623	coding	2	0	1	0.233579	0	3.92303
BDNF	NM_001709	coding	17.7278	0.0727258	0	2.16374	0.24155	0
BDNF	NM_001143816	coding	11.756	0.000219326	0	1.27458	0.000647094	0
BDNF	NM_001143805	coding	0.000127385	0.771819	0	1.63155e-05	2.69011	0
BDNF	NM_001143813	coding	9.19744	0.0906324	0	1.12763	0.30238	0
BDNF	NM_001143809	coding	0.000252285	1.52858	0	3.27666e-05	5.40254	0
BDNF	NM_001143808	coding	0.000287311	1.7408	0	3.74149e-05	6.16896	0
BDNF	NM_170733	coding	22.0945	0.0628343	0	2.68866	0.208075	0
BDP1	NM_018429	coding	115	1	0	5.08975	1.20439	0
BECN1	NM_003766	coding	87	9	1	19.8994	56.0187	7.68314
BEND3	NM_001080450	coding	15	0	0	1.10398	0	0
BEND7	NM_001100912	coding	17.3758	0	0	4.46619	0	0
BET1	NM_005868	coding	37	1	0	5.9249	4.35762	0
BET1L	NM_001098787	coding	69.7883	0	0	12.152	0	0
BET1L	NM_016526	coding	23.2116	0	0	3.84895	0	0
BEX2	NM_001168401	coding	3.93416	0	0	2.33179	0	0
BEX4	NM_001080425	coding	0	0	1	0	0	12.8432
BFAR	NM_016561	coding	79	2	0	12.7253	8.76679	0
BFSP1	NM_001161705	coding	9.05157	0	0	2.15064	0	0
BFSP1	NM_001195	coding	5.94843	0	0	1.32172	0	0
BHLHE22	NM_152414	coding	0	0	1	0	0	4.84692
BHLHE40	NM_003670	coding	97	0	4	15.6711	0	21.7073
BHMT	NM_001713	coding	0	1	0	0	5.33547	0
BHMT2	NM_001178005	coding	0	0	0.975492	0	0	6.5317
BICC1	NM_001080512	coding	11	1	0	1.7287	4.27659	0
BICD1	NM_001003398	coding	9	0	0.987091	1.34292	0	4.94747
BICD2	NM_001003800	coding	14.3296	1	1.08273e-07	1.09474	2.07897	2.77855e-07
BICD2	NM_015250	coding	32.6704	0	1	3.46246	0	3.55999
BID	NM_197967	coding	1.35035	0.725584	0	0.310602	4.54168	0
BID	NM_001244567	coding	22.6214	1.12532	0	5.25011	7.10711	0
BIN1	NM_139351	coding	15.314	1.65986	1.66256	3.54577	10.4583	12.9306
BIN1	NM_139350	coding	1.99111	0.215814	0.216165	0.442217	1.30433	1.61267
BIN1	NM_139348	coding	20.261	0.0133421	0.0133638	4.25139	0.076184	0.0941932
BIN3	NM_018688	coding	17	0	0	4.51154	0	0
BIRC2	NM_001166	coding	170.244	1.51778e-10	0	21.983	5.33328e-10	0
BIRC2	NM_001256166	coding	0.00140989	1	0	0.000288791	5.57404	0
BIRC2	NM_001256163	coding	15.7549	4.81267e-12	0	1.89603	1.5761e-11	0
BIRC3	NM_182962	coding	0.00888776	1	1	0.00100103	3.06495	3.78331
BIRC3	NM_001165	coding	159.991	1.42946e-10	1.42946e-10	11.3458	2.75855e-10	3.4051e-10
BIRC5	NM_001012271	coding	1.75851	0.0784578	0.439028	0.319245	0.387601	2.67725
BIRC5	NM_001012270	coding	13.1198	2.64258	8.57237e-15	2.55903	14.0265	5.61654e-14
BIRC5	NM_001168	coding	116.122	0.278958	1.56097	21.6339	1.41426	9.76867
BIRC6	NM_016252	coding	326	1	0	10.1767	0.849488	0
BIVM	NM_017693	coding	18.9636	0	0	2.40562	0	0
BIVM-ERCC5	NM_001204425	coding	31.8032	0	0	3.03108	0	0
BLCAP	NM_001167821	coding	9.20812	0	0	2.21685	0	0
BLCAP	NM_001167822	coding	7.97172	0	0	1.91355	0	0
BLCAP	NM_001167820	coding	12.5795	0	0	2.79512	0	0
BLCAP	NM_001167823	coding	24.4307	0	0	5.67809	0	0
BLID	NM_001001786	coding	9	0	0	5.11773	0	0
BLM	NM_000057	coding	16	0	0	1.73203	0	0
BLMH	NM_000386	coding	17	0	1	3.28451	0	6.48994
BLOC1S1	NM_001487	coding	21	0.00133731	0	17.8088	0.0308615	0
BLOC1S2	NM_173809	coding	9.27352	0	0	1.70501	0	0
BLOC1S3	NM_212550	coding	10	0	0	1.88525	0	0
BLOC1S4	NM_018366	coding	16	2	0	5.07286	17.2557	0
BLOC1S5-TXNDC5	NR_037616	nonCoding	67.9667	1.2729e-07	0.11396	9.93882	5.06526e-07	0.559772
BLOC1S6	NM_012388	coding	27	0	0	3.35815	0	0
BLVRA	NM_000712	coding	63.9878	0	0	29.0144	0	0
BLVRB	NM_000713	coding	19	4	1	10.8798	62.3302	19.2348
BLZF1	NM_003666	coding	32	0	0	6.77257	0	0
BMI1	NM_005180	coding	81.8301	0	0.353497	11.6939	0	1.69689
BMP1	NM_001199	coding	0.323569	0.658696	0	0.0579052	3.20779	0
BMP1	NM_006129	coding	8.98744	5.08383e-08	0	1.15142	1.77239e-07	0
BMP2K	NM_198892	coding	39	0	0	5.02271	0	0
BMP4	NM_130850	coding	43.101	1	0	12.1978	7.70131	0
BMP4	NM_001202	coding	29.6757	0	0	7.49408	0	0
BMP4	NM_130851	coding	4.22318	0	0	1.15905	0	0
BMPR1A	NM_004329	coding	36	0	0	4.87996	0	0
BMPR1B	NM_001256793	coding	0.400397	0	0.400397	0.0363648	0	1.22152
BMPR2	NM_001204	coding	112	1	2	4.54834	1.10511	2.72825
BMS1	NM_014753	coding	72	3	1	4.38517	4.97217	2.04585
BMS1P4	NR_026592	nonCoding	7	0	1	1.75059	0	8.4005
BNIP1	NM_001205	coding	24.9877	0	0	9.74392	0	0
BNIP2	NM_004330	coding	37	1	1	7.20545	5.29943	6.54151
BNIP3	NM_004052	coding	82	2	1	26.2018	17.3907	10.7334
BNIP3L	NM_004331	coding	50	0	0	7.00236	0	0
BOC	NM_033254	coding	0	1	2	0	3.11651	7.69391
BOD1	NM_138369	coding	71.9969	5.96111	0.0257367	18.2473	41.1134	0.219108
BOD1	NM_001159651	coding	0.00313272	0.038892	4.97426	0.000884024	0.298657	47.1509
BOD1L1	NM_148894	coding	198	1	4	9.20629	1.26529	6.24738
BOD1L2	NM_001257964	coding	0	1	0	0	3.98526	0
BOK	NM_032515	coding	80	3	0	14.8142	15.1175	0
BOLA3	NM_212552	coding	9	0	2	7.96297	0	59.4403
BOP1	NM_015201	coding	130	0	0	26.8527	0	0
BORA	NM_024808	coding	8	0	0	1.41411	0	0
BPGM	NM_001724	coding	11.4228	0	0	3.13847	0	0
BPGM	NM_199186	coding	6.57724	0	0	1.53156	0	0
BPHL	NM_004332	coding	18.7207	0	0	5.92779	0	0
BPNT1	NM_006085	coding	34	0	0	6.77189	0	0
BPTF	NM_004459	coding	80.5505	0.557127	0	3.63464	0.684095	0
BRAF	NM_004333	coding	16	2	1	2.66213	9.05544	5.58892
BRAP	NM_006768	coding	40	0	0	4.87	0	0
BRAT1	NM_152743	coding	36	1	1	5.8566	4.42704	5.46464
BRCC3	NM_024332	coding	0.133847	0.377347	0.125782	0.0223991	1.71844	0.707068
BRCC3	NM_001018055	coding	16.3431	1.34507	0.448357	2.80688	6.28643	2.58661
BRCC3	NM_001242640	coding	15.523	1.27758	0.42586	2.66323	5.96473	2.45424
BRD1	NM_014577	coding	24	0	0	2.55294	0	0
BRD2	NM_005104	coding	162.656	0.202127	3.17932e-09	16.2911	0.5509	1.06962e-08
BRD2	NM_001199455	coding	86.339	4.11884	6.47864e-08	9.19608	11.9382	2.31792e-07
BRD2	NM_001113182	coding	42.748	0.486774	7.6566e-09	4.35898	1.35072	2.62254e-08
BRD2	NM_001199456	coding	23.9259	1.76169e-12	3	3.65347	7.32044e-12	15.3878
BRD3	NM_007371	coding	43	1	0	3.74039	2.36711	0
BRD4	NM_014299	coding	19.4717	1.99276	5.87835e-25	2.05919	5.73478	2.08817e-24
BRD4	NM_058243	coding	11.5283	0.00724293	7	1.08711	0.0185862	22.1729
BRD7	NM_013263	coding	55.7537	0	0	11.8357	0	0
BRD8	NM_001164326	coding	48.7971	3.92967	1.96484	8.02639	17.5895	10.856
BRD8	NM_006696	coding	68.2029	0.0703256	0.0351628	10.3341	0.289969	0.178966
BRD9	NM_001009877	coding	27.3065	1.92244	0	5.30929	10.1717	0
BRE	NM_004899	coding	7.72624	0	0	1.9273	0	0
BREA2	NR_015445	nonCoding	0	1	0	0	13.312	0
BRF1	NM_001242789	coding	15.8611	0	0	2.71743	0	0
BRF1	NM_145685	coding	10.1314	0	0	1.39106	0	0
BRF2	NM_018310	coding	15	0	0	3.67624	0	0
BRI3	NM_015379	coding	46	5	5	28.5052	84.3152	104.077
BRI3BP	NM_080626	coding	6	0	0	2.3121	0	0
BRIP1	NM_032043	coding	20	0	0	1.2005	0	0
BRIX1	NM_018321	coding	47	3	4	18.0972	31.4344	51.736
BRK1	NM_018462	coding	63	3	1	26.2588	34.0272	14.0008
BRMS1	NM_001024957	coding	48.2952	0	0	17.4706	0	0
BRMS1	NM_015399	coding	39.7048	0	0	13.5434	0	0
BROX	NM_144695	coding	5	0	0	1.45796	0	0
BRPF1	NM_001003694	coding	11.7886	0.453409	0.453409	1.22216	1.27916	1.57897
BRPF1	NM_004634	coding	14.2114	0.546591	0.546591	1.47897	1.54794	1.91074
BRPF3	NM_015695	coding	125	9	0	10.1728	19.9316	0
BRSK1	NM_032430	coding	17	0	2	2.70458	0	10.6881
BRWD1	NM_001007246	coding	17.2974	0	0	3.21281	0	0
BRWD1	NM_018963	coding	31.5085	1	0	1.75385	1.51473	0
BRWD1	NM_033656	coding	103.194	8.33696e-16	0	2.82803	6.21737e-16	0
BRWD1-IT1	ENST00000435608.1	nonCoding	1	0	0	1.00238	0	0
BRWD3	NM_153252	coding	68	4	1	2.60543	4.17061	1.28703
BSCL2	NM_032667	coding	17.0309	0.00386625	0	5.49208	0.0339281	0
BSCL2	NM_001130702	coding	21.3279	0.472514	0	7.5865	4.5738	0
BSDC1	NM_001143890	coding	0.489433	2.08529e-09	1.78346	0.0932385	1.08103e-08	11.4126
BSDC1	NM_001143888	coding	38.9434	1.47958	0.00435883	6.56194	6.78432	0.024671
BSDC1	NM_001143889	coding	0.34077	0.000514733	0.201814	0.0620943	0.00255236	1.23526
BSDC1	NM_018045	coding	29.2264	3.51991	0.0103696	5.01251	16.4279	0.0597396
BSG	NM_198589	coding	436.552	20.9965	0.194963	122.978	160.957	1.84487
BSG	NM_198591	coding	8.18167	0.003354	3.76258	2.44833	0.0273125	37.821
BST2	NM_004335	coding	159	6	1	82.9992	85.2311	17.5346
BTAF1	NM_003972	coding	99	0	0	6.89491	0	0
BTBD1	NM_001011885	coding	8.45135	1.58118	0	1.29374	6.58677	0
BTBD1	NM_025238	coding	98.5486	0.41882	0	14.6824	1.69802	0
BTBD10	NM_032320	coding	56	0	0	10.949	0	0
BTBD2	NM_017797	coding	43	4	0	8.05084	20.3799	0
BTBD3	NM_181443	coding	87.4118	0	0	9.38376	0	0
BTBD3	NM_014962	coding	16.5882	0	0	1.67407	0	0
BTBD6	NM_033271	coding	32	1	3	7.89395	6.71297	24.859
BTBD7	NM_001002860	coding	58.1453	4.56263e-26	1.36879e-25	3.37367	7.204e-26	2.66774e-25
BTBD7	NM_018167	coding	1.85474	1	3	0.354021	5.19419	19.2348
BTBD8	NM_183242	coding	3	0	0	1.01624	0	0
BTBD9	NM_001099272	coding	36.4772	0.12737	0	2.04364	0.194188	0
BTD	NM_000060	coding	30	0	0	7.12104	0	0
BTF3	NM_001037637	coding	31.3821	0.000246739	4.17689	12.3158	0.00263504	55.0619
BTF3	NM_001207	coding	351.618	8.99975	2.82311	170.983	119.092	46.1135
BTF3L4	NM_152265	coding	76.6038	0.65821	0	8.08712	1.89094	0
BTF3L4	NM_001136497	coding	3.00133e-08	1.34179	0	3.21492e-09	3.91121	0
BTG1	NM_001731	coding	168	2	0	17.5957	5.70029	0
BTG3	NM_006806	coding	42.8436	0	0	14.3642	0	0
BTN2A1	NM_078476	coding	51.2199	0	0	7.97022	0	0
BTN2A1	NM_007049	coding	15.0736	0	0	2.52945	0	0
BTN2A2	NM_001197238	coding	5.03922	0	0	1.38146	0	0
BTN2A2	NM_006995	coding	24.5897	0	0	3.35925	0	0
BTN2A2	NM_001197240	coding	9.53351	0	0	1.35097	0	0
BTN2A3P	NR_027795	nonCoding	16	0	0	3.15853	0	0
BTN3A1	NM_001145009	coding	14.2149	5.34787e-06	0	1.66253	1.70206e-05	0
BTN3A1	NM_001145008	coding	5.34991	0.905541	0	0.799982	3.68478	0
BTN3A1	NM_007048	coding	72.2225	0.0927966	0	10.3089	0.360449	0
BTN3A2	NM_001197249	coding	57.7928	1.58574e-06	0	7.62735	5.69512e-06	0
BTN3A2	NM_001197247	coding	18.1144	1.30872e-08	0	2.16773	4.26188e-08	0
BTN3A2	NM_001197248	coding	15.0436	9.46834e-06	0	2.05916	3.52681e-05	0
BTN3A2	NM_007047	coding	16.13	4.42582e-07	0	2.07407	1.54865e-06	0
BTN3A2	NM_001197246	coding	12.9193	0.999988	0	2.23924	4.71659	0
BTN3A3	NM_006994	coding	37.7512	0	0	6.164	0	0
BTNL8	NM_001159710	coding	0	12	0	0	99.9151	0
BTRC	NM_003939	coding	27.1161	0	0	2.19475	0	0
BTRC	NM_033637	coding	27.344	0	0	2.17441	0	0
BUB1	NM_004336	coding	236	0	1	33.0323	0	4.70159
BUB1B	NM_001211	coding	56.9531	0	0	7.46029	0	0
BUB3	NM_004725	coding	134.46	6.49659e-13	0	23.8451	3.13516e-12	0
BUB3	NM_001007793	coding	240.539	2	0	76.7105	17.3568	0
BUD13	NM_001159736	coding	0.533093	0.999948	0	0.144847	7.39355	0
BUD13	NM_032725	coding	56.4669	5.23477e-05	0	12.5467	0.000316522	0
BUD31	NM_003910	coding	27	0	2	12.6888	0	31.5723
BYSL	NM_004053	coding	57	7	0	14.0399	46.9199	0
BZRAP1	NM_001261835	coding	21.1374	0	0	1.35065	0	0
BZW1	NM_001207068	coding	57.2591	0	0	18.761	0	0
BZW1	NM_001207069	coding	143.725	0	0	23	0	0
BZW1	NM_001207067	coding	86.4157	0.395923	0	12.5208	1.56107	0
BZW1	NM_014670	coding	18.6	7.60408	0	2.8625	31.8456	0
BZW2	NM_001159767	coding	4.74703	0	0	1.2423	0	0
BZW2	NM_014038	coding	80.2519	0	0	21.1829	0	0
C10orf10	NM_007021	coding	35	1	0	8.32805	6.47508	0
C10orf11	ENST00000354343.2	coding	3	1	0	1.4764	13.3922	0
C10orf118	NM_018017	coding	25	1	1	1.95223	2.12501	2.62306
C10orf12	NM_015652	coding	52	0	0	5.60805	0	0
C10orf137	NM_001202438	coding	16.7841	0	0	1.75753	0	0
C10orf2	NM_001163812	coding	4.92533	0	0.356216	0.658724	0	1.6003
C10orf2	NM_021830	coding	40.0712	0	0.643784	5.42434	0	2.92734
C10orf32	NM_001136200	coding	16.6698	0	0	3.35562	0	0
C10orf32-AS3MT	NR_037644	nonCoding	9.32962	0	0	1.6745	0	0
C10orf35	NM_145306	coding	5	0	0	2.27772	0	0
C10orf54	NM_022153	coding	14	0	0	1.43774	0	0
C10orf67	NM_153714	coding	1	0	2	0.166553	0	11.1892
C10orf76	NM_024541	coding	28	0	0	3.34665	0	0
C10orf85	ENST00000369071.2	coding	6	0	0	1.54059	0	0
C10orf88	NM_024942	coding	14	0	0	2.22297	0	0
C11orf1	NM_022761	coding	8	0	0	3.98914	0	0
C11orf24	NM_022338	coding	36	0	0	8.39483	0	0
C11orf30	NM_020193	coding	40	0	0	3.55772	0	0
C11orf31	NM_170746	coding	29	3	0	10.9852	30.9243	0
C11orf35	NM_173573	coding	8	0	0	1.86908	0	0
C11orf48	NM_024099	coding	37	3	0	13.7395	30.3152	0
C11orf49	NM_001003676	coding	0.00607612	0	1	0.00150116	0	8.29888
C11orf49	NM_001003677	coding	5.14296	0	0	1.45801	0	0
C11orf49	NM_024113	coding	8.58851	0	0	2.46042	0	0
C11orf49	NM_001003678	coding	3.26246	0	0	1.31617	0	0
C11orf54	NM_014039	coding	47	0	0	9.63923	0	0
C11orf57	NM_018195	coding	83.0586	0	0	10.8828	0	0
C11orf57	NM_001082970	coding	13.9058	0	0	1.82347	0	0
C11orf58	NM_014267	coding	144	48	0	17.7346	160.868	0
C11orf63	NM_024806	coding	25	0	0	4.20959	0	0
C11orf68	NM_001135635	coding	48.1177	0.476407	0.952814	15.1384	4.07871	10.0694
C11orf68	NM_031450	coding	52.8823	0.523593	1.04719	16.6695	4.49134	11.088
C11orf73	NM_016401	coding	5.99964	1.00006e-05	9.99928e-06	2.58647	0.000117321	0.0001448
C11orf74	NM_001276727	coding	4.84587	0	0	3.53464	0	0
C11orf80	NM_024650	coding	12.7275	0.00138285	0	2.68557	0.00794031	0
C11orf82	NM_145018	coding	12	0	0	1.65085	0	0
C11orf83	NM_001085372	coding	38	0	1	9.55194	0	8.44357
C11orf84	NM_138471	coding	70	1	0	17.497	6.80197	0
C11orf95	NM_001144936	coding	48	6	12	4.21496	14.3375	35.3959
C11orf96	NM_001145033	coding	1	1	0	0.3691	10.0442	0
C12orf10	NM_021640	coding	35	1	0	14.12	10.9783	0
C12orf23	NM_152261	coding	68	0	0	9.89351	0	0
C12orf29	NM_001009894	coding	40	0	0	6.82206	0	0
C12orf4	NM_020374	coding	15	1	1	1.92524	3.49271	4.31133
C12orf43	NM_022895	coding	20	0	0	5.10589	0	0
C12orf44	NM_021934	coding	15.7248	0	0.00200908	5.36379	0	0.0230198
C12orf44	NM_001098673	coding	12.2751	0	0.997991	4.75265	0	12.9794
C12orf45	NM_152318	coding	22	1	0	17.337	21.4448	0
C12orf49	NM_024738	coding	56	0	1	9.89162	0	5.93332
C12orf52	NM_032848	coding	44	1	0	12.1506	7.51474	0
C12orf57	NM_138425	coding	63	6	0	56.87	147.389	0
C12orf65	NM_001194995	coding	13.4571	0	0	3.46987	0	0
C12orf65	NM_001143905	coding	16.206	0	0	4.94007	0	0
C12orf73	NM_001135570	coding	6	1	0	1.73715	7.87872	0
C12orf75	NM_001145199	coding	89	3	0	31.9361	29.2943	0
C12orf76	NM_207435	coding	7	0	0	1.76318	0	0
C12orf77	NM_001101339	coding	3	3	0	0.974483	26.5182	0
C14orf1	NM_007176	coding	38	0	0	12.095	0	0
C14orf119	NM_017924	coding	76	0	0	12.6494	0	0
C14orf142	NM_032490	coding	6	0	0	2.50084	0	0
C14orf159	NM_001102368	coding	19.0784	1.44514	0.481713	3.40801	7.02487	2.89045
C14orf159	NM_001102369	coding	2.32348e-06	1.44514	0.481713	4.15046e-07	7.02487	2.89045
C14orf166	NM_016039	coding	111	3	0	51.7682	38.0742	0
C14orf169	NM_024644	coding	39	0	0	7.7646	0	0
C14orf2	NM_001127393	coding	9.99145e-09	0	3	5.31754e-09	0	53.6318
C14orf2	NM_004894	coding	33	0	4.14533e-17	24.809	0	1.04682e-15
C14orf28	NM_001017923	coding	9	0	0	1.51806	0	0
C14orf79	NM_174891	coding	7	0	2	1.81543	0	17.4233
C14orf80	NM_001134877	coding	5.0544	0	0	1.61085	0	0
C14orf93	NM_021944	coding	15.9324	0	0	3.30771	0	0
C15orf38	NM_182616	coding	7.81619	0	0	1.88637	0	0
C15orf38-AP3S2	NM_001199058	coding	58.0092	0.0603817	0.0301909	4.54509	0.128742	0.0794584
C15orf39	NM_015492	coding	12	0	1	1.32866	0	3.71922
C15orf40	NM_001160115	coding	7.33199	0	0	6.51066	0	0
C15orf41	NM_001130010	coding	9.93309	0	0	1.96562	0	0
C15orf41	NM_032499	coding	7.06691	0	0	1.33486	0	0
C15orf48	NM_197955	coding	37.9836	0	0	22.191	0	0
C15orf52	NM_207380	coding	14	2	6	1.28821	5.00795	18.5451
C15orf57	NM_001080792	coding	3.97868	0	0	1.28303	0	0
C16orf13	NM_032366	coding	25.1741	0	0	14.6899	0	0
C16orf45	NM_001142469	coding	8.85976	0	0	2.11841	0	0
C16orf52	NM_001164579	coding	15	0	0	1.65522	0	0
C16orf58	NM_022744	coding	105	0	0	18.2962	0	0
C16orf62	NM_020314	coding	13	0	2	1.6364	0	8.45658
C16orf70	NM_025187	coding	11	0	0	1.89786	0	0
C16orf72	NM_014117	coding	39	0	1	4.80433	0	4.13797
C16orf74	NM_206967	coding	8	0	0	4.37159	0	0
C16orf80	NM_013242	coding	30	0	1	11.3904	0	12.7537
C16orf91	NM_001272051	coding	15	0	0	7.51787	0	0
C16orf95	NM_001195124	coding	6.99937	0	0	2.96786	0	0
C17orf103	NM_152914	coding	18	0	0	1.84388	0	0
C17orf107	NM_001145536	coding	0	0	1	0	0	5.3423
C17orf49	NM_174893	coding	67.85	0.00272182	1.65857	36.9941	0.0403843	30.3764
C17orf49	NM_001142799	coding	0.00314435	0.99455	6.366e-07	0.00193381	16.6449	1.31513e-05
C17orf49	NM_001142798	coding	0.000418226	0.0021897	1.33432	0.000227021	0.0323452	24.3295
C17orf51	NM_001113434	coding	52	0	0	3.22151	0	0
C17orf53	NM_001171251	coding	5.64839	0	0	1.01714	0	0
C17orf58	NM_181655	coding	4.21981	0	0	1.4556	0	0
C17orf58	NM_181656	coding	9.78019	0	0	3.06516	0	0
C17orf59	NM_017622	coding	14	1	0	3.58532	6.969	0
C17orf62	NM_001193655	coding	44.4527	0	0	9.41217	0	0
C17orf70	NM_025161	coding	64.683	0	0	8.67927	0	0
C17orf75	NM_022344	coding	22	0	0	2.35296	0	0
C17orf76-AS1	NR_027159	nonCoding	14.0476	1.02522e-06	3.66914e-21	5.67656	1.12738e-05	4.98041e-20
C17orf76-AS1	NR_027158	nonCoding	1.21012	3.98004	1.4244e-14	0.66647	59.6499	2.63514e-13
C17orf76-AS1	NR_027168	nonCoding	53.7928	6.99578e-13	0.833705	25.3776	8.98117e-12	13.2117
C17orf76-AS1	NR_027169	nonCoding	4.25106	1.99019e-13	0.237176	1.95471	2.49029e-12	3.66332
C17orf76-AS1	NR_027162	nonCoding	10.6915	4.64075e-19	5.5305e-07	3.77291	4.45654e-18	6.55576e-06
C17orf76-AS1	NR_027166	nonCoding	106.859	0.190042	6.80134e-16	55.3099	2.67677	1.18251e-14
C17orf76-AS1	NR_027167	nonCoding	0.190484	2.42178e-12	2.8861	0.0921703	3.18888e-11	46.9097
C17orf76-AS1	NR_027164	nonCoding	4.89289	1.65651e-13	0.19741	2.24142	2.06501e-12	3.03771
C17orf76-AS1	NR_027165	nonCoding	4.56586	1.2942e-10	0.069599	2.39617	1.84827e-09	1.22692
C17orf76-AS1	NR_027667	nonCoding	5.49061	6.18827e-17	3.32791e-08	2.14106	6.56669e-16	4.3591e-07
C17orf76-AS1	NR_045029	nonCoding	2.77025	1.64716e-12	1.70405e-17	1.32995	2.15191e-11	2.74801e-16
C17orf76-AS1	NR_045021	nonCoding	0.000140232	2.73574	2.04082e-15	7.42298e-05	39.4073	3.62874e-14
C17orf76-AS1	NR_027163	nonCoding	64.4995	1.55021e-14	0.0184742	28.1526	1.84129e-13	0.270862
C17orf76-AS1	NR_045026	nonCoding	16.1197	0	1.75371	14.4978	0	52.9812
C17orf76-AS1	NR_027176	nonCoding	3.34529	3.59053e-25	0	1.37678	4.02124e-24	0
C17orf76-AS1	NR_027177	nonCoding	3.16485	1.95591e-17	0	1.87355	3.15087e-16	0
C17orf76-AS1	NR_027170	nonCoding	51.023	7.10213e-12	0.00381936	25.2368	9.55933e-11	0.0634568
C17orf76-AS1	NR_027179	nonCoding	0.58187	3.09416	0	0.772934	111.848	0
C17orf80	NM_001100621	coding	9.95277	0	0	1.38162	0	0
C17orf80	NM_001100622	coding	8.77312	0	0	2.04775	0	0
C17orf85	NM_001114118	coding	31	1	0	1.85669	1.62985	0
C17orf89	NM_001086521	coding	6	0	0	5.25177	0	0
C17orf96	NM_001130677	coding	16	0	0	2.42881	0	0
C17orf97	NM_001013672	coding	2	1	0	0.533078	7.25322	0
C18orf21	NM_031446	coding	16.7733	0	0	7.84512	0	0
C18orf25	NM_001008239	coding	61.4244	0	0	5.70014	0	0
C18orf25	NM_145055	coding	11.5756	0	0	1.03823	0	0
C18orf32	NM_001199346	coding	13.8733	0	0	4.56696	0	0
C18orf54	NM_173529	coding	16	0	0	1.56135	0	0
C18orf56	NM_001012716	coding	2	0	0	1.16153	0	0
C18orf8	NM_013326	coding	11.5642	0.00230535	0	2.54644	0.0138141	0
C18orf8	NM_001276342	coding	4.99034	1.23779	0	1.24928	8.43232	0
C19orf10	NM_019107	coding	85	2	0	39.6423	25.3828	0
C19orf12	NM_001031726	coding	19.9645	0	0	2.21801	0	0
C19orf24	NM_017914	coding	47	3	0	25.7405	44.7106	0
C19orf25	NM_152482	coding	12	0	0	2.60611	0	0
C19orf33	NM_033520	coding	96	2	0	102.073	57.8684	0
C19orf40	NM_152266	coding	4	0	0	1.7229	0	0
C19orf43	NM_024038	coding	124	3	2	66.7917	43.9736	36.1867
C19orf44	NM_032207	coding	9	0	0	1.31844	0	0
C19orf47	NM_001256440	coding	0.00121671	0.407372	0	0.000283454	2.5826	0
C19orf47	NM_001256441	coding	0.00136715	0.457744	0	0.000319261	2.90886	0
C19orf48	NM_199249	coding	8.76623	0	0	2.57762	0	0
C19orf48	NM_199250	coding	49.2337	0	0	16.0457	0	0
C19orf52	NM_138358	coding	21	1	0	7.37354	9.55492	0
C19orf53	NM_014047	coding	91	5	2	49.0704	73.37	36.2266
C19orf54	NM_198476	coding	6	2	0	1.06829	9.69028	0
C19orf60	NM_001100418	coding	12.95	0.0214549	0	7.21321	0.325204	0
C19orf60	NM_001100419	coding	0.0500193	0.978545	0	0.03012	16.035	0
C19orf66	NM_018381	coding	41	2	0	9.46176	12.56	0
C19orf68	ENST00000328759.7	coding	6	0	0	1.29161	0	0
C19orf70	NM_205767	coding	29	4	0	15.7942	59.283	0
C19orf73	NM_018111	coding	2	0	0	1.31765	0	0
C1D	NM_173177	coding	13.9988	0	0	5.74682	0	0
C1GALT1	NM_020156	coding	96	1	0	7.54463	2.13864	0
C1GALT1C1	NM_001011551	coding	58.9983	0	0	16.6968	0	0
C1orf109	NM_017850	coding	15	0	0	3.12207	0	0
C1orf110	NM_178550	coding	9	0	0	2.84245	0	0
C1orf112	NM_018186	coding	20	0	0	2.91505	0	0
C1orf115	NM_024709	coding	5	0	1	0.824638	0	5.54003
C1orf122	NM_001142726	coding	34.0813	0	0	14.0974	0	0
C1orf122	NM_198446	coding	7.9187	0	0	2.94497	0	0
C1orf123	NM_017887	coding	38	1	0	17.1829	12.305	0
C1orf127	NM_001170754	coding	0	1	0	0	4.8311	0
C1orf131	NM_152379	coding	7	0	0	2.39105	0	0
C1orf138	ENST00000369035.2	coding	1	0	0	1.00034	0	0
C1orf151-NBL1	NM_001204089	coding	109.557	0.651997	0.325998	26.5191	4.2947	2.65064
C1orf159	NM_017891	coding	10	0	0	2.32968	0	0
C1orf174	NM_207356	coding	24	0	0	7.0612	0	0
C1orf198	NM_032800	coding	97.5289	0	0	12.7108	0	0
C1orf21	NM_030806	coding	48	1	1	2.28249	1.29401	1.5973
C1orf213	NR_033690	nonCoding	325	356	354	55.5646	1656.28	2033
C1orf216	NM_152374	coding	12	1	0	2.00477	4.54624	0
C1orf226	NM_001085375	coding	9.19223	0	0	1.09203	0	0
C1orf233	NM_001242659	coding	3	0	1	0.703923	0	7.88175
C1orf27	NM_017847	coding	36.2175	1.32431	0	4.55662	4.534	0
C1orf27	NM_001164246	coding	4.69585	4.49697	0	0.605722	15.7852	0
C1orf27	NM_001164245	coding	0.0866005	3.17872	0	0.0110919	11.0791	0
C1orf35	NM_024319	coding	9	0	0	3.41976	0	0
C1orf43	NM_015449	coding	129.181	0.542495	0	35.256	4.02904	0
C1orf43	NM_001098616	coding	123.535	0.0362153	0	31.9034	0.254512	0
C1orf43	NM_138740	coding	4.28448	2.42129	0	1.20557	18.5401	0
C1orf52	NM_198077	coding	9.65831	0	0	1.45086	0	0
C1orf56	NM_017860	coding	7	0	0	1.69189	0	0
C1orf63	NM_020317	coding	40	3	0	13.3833	27.3147	0
C1orf74	NM_152485	coding	6	0	0	1.88404	0	0
C1orf85	NM_001256605	coding	3.83694	0	0	1.37884	0	0
C1orf85	NM_144580	coding	6.1524	0	0	1.85924	0	0
C1orf86	NM_182533	coding	2.16065	0	4.03658e-05	1.45277	0	0.00091169
C1orf86	NM_001256946	coding	3.72154	0	0	1.15673	0	0
C1orf86	NM_001256947	coding	0.0142424	0	0.99996	0.0117726	0	27.7644
C1orf86	NM_001256945	coding	8.10357	0	0	2.80911	0	0
C1QBP	NM_001212	coding	102	3	1	42.9895	34.4076	14.1573
C1QTNF1	NM_153372	coding	10.9016	0	0	1.96817	0	0
C1QTNF6	NM_031910	coding	6.8562	0	0	1.14464	0	0
C1R	NM_001733	coding	19	1	1	4.10995	5.88644	7.26609
C1RL	NM_016546	coding	10	1	0	1.44251	3.92545	0
C1S	NM_201442	coding	1.23467	0	0.176381	0.21537	0	1.03349
C1S	NM_001734	coding	5.76534	0	0.823619	1.03781	0	4.98012
C2	NM_001178063	coding	6.80885	0	0	1.66873	0	0
C20orf111	NM_016470	coding	80	3	0	17.4903	17.8484	0
C20orf112	NM_080616	coding	8.94209	0	2.9807	0.718306	0	8.04279
C20orf194	NM_001009984	coding	39	0	2	2.76689	0	4.76624
C20orf196	NM_152504	coding	3	0	0	1.27316	0	0
C20orf203	NM_182584	coding	1	1	0	0.102267	2.78295	0
C20orf24	NM_199483	coding	4.09402	3.98809	0	2.03937	54.0607	0
C20orf24	NM_018840	coding	57.8348	0.00912326	0.51063	25.4476	0.109239	7.54714
C20orf27	NM_001258429	coding	97.3652	0.932966	0	36.3481	9.47793	0
C20orf27	NM_001258430	coding	3.80215	4.46937e-07	0	1.05471	3.37382e-06	0
C20orf27	NM_001039140	coding	16.4775	0.0613413	0	5.81895	0.58949	0
C20orf96	NM_153269	coding	8.48757	0	0	2.59371	0	0
C20orf96	NM_080571	coding	7.51243	0	0	2.29001	0	0
C21orf119	NR_026845	nonCoding	5	0	0	2.9707	0	0
C21orf2	NM_004928	coding	15.3551	0	0	3.37059	0	0
C21orf33	NM_004649	coding	85.9886	0	0	25.2841	0	0
C21orf33	NM_198155	coding	5.01142	0	0	1.56062	0	0
C21orf58	NM_058180	coding	16	0	1	2.6424	0	5.5475
C21orf59	NM_021254	coding	37.9615	0	0.0708934	13.0395	0	0.81798
C22orf28	NM_014306	coding	104	0	0	24.6743	0	0
C22orf29	NM_024627	coding	28	0	1	2.06852	0	2.48153
C22orf39	NM_173793	coding	12	0	0	2.97521	0	0
C22orf46	NM_001142964	coding	3	4	2	0.295577	10.7246	6.61908
C2CD2	NM_199050	coding	40.3278	0	0	3.38133	0	0
C2CD2	NM_015500	coding	13.6722	0	0	1.05588	0	0
C2CD2L	NM_014807	coding	36	1	0	5.2769	3.98884	0
C2CD3	NM_015531	coding	13	1	0	1.01435	2.12332	0
C2CD5	NM_014802	coding	63	0	0	7.00712	0	0
C2orf42	NM_017880	coding	9	0	0	1.74782	0	0
C2orf43	NM_021925	coding	11	0	0	1.88789	0	0
C2orf44	NM_001142319	coding	9.82484	0	0	1.27537	0	0
C2orf47	NM_024520	coding	6	0	0	1.94639	0	0
C2orf49	NM_024093	coding	8	0	0	4.42088	0	0
C2orf68	NM_001013649	coding	38	0	0	4.36724	0	0
C2orf69	NM_153689	coding	10	0	0	1.31482	0	0
C2orf72	NM_001144994	coding	2	0	1	0.273912	0	4.60044
C2orf74	NM_001143960	coding	2.45928	0	0	1.40169	0	0
C2orf76	NM_001017927	coding	4	0	0	2.06385	0	0
C2orf82	NM_206895	coding	2	0	0	2.10824	0	0
C2orf88	NM_032321	coding	0	0	0.368715	0	0	1.53228
C2orf88	NM_001042520	coding	0	0	0.257926	0	0	1.06408
C3	NM_000064	coding	15	2	0	1.44138	5.22983	0
C3orf14	NM_020685	coding	4	0	0	2.55627	0	0
C3orf17	NM_015412	coding	20.6497	0	0	2.08438	0	0
C3orf18	NM_001171741	coding	10.3815	0.978675	0	2.11323	5.42119	0
C3orf18	NM_001171743	coding	14.3923	0	0	2.94925	0	0
C3orf33	NM_173657	coding	4	0	0	1.01536	0	0
C3orf37	NM_001006109	coding	6.18176	0.00688338	0	1.68995	0.0512076	0
C3orf37	NM_020187	coding	13.8182	0.993117	0	4.181	8.17707	0
C3orf38	NM_173824	coding	30	0	1	5.59124	0	6.26045
C3orf52	NM_024616	coding	14	0	0	3.01242	0	0
C3orf62	NM_198562	coding	10	0	0	1.36536	0	0
C4BPB	NM_000716	coding	7.85234	0	0	3.45197	0	0
C4BPB	NM_001017364	coding	5.68843	0	0	2.50744	0	0
C4BPB	NM_001017367	coding	4.03305	0	0	2.07872	0	0
C4BPB	NM_001017366	coding	2.59558	0	0	1.34063	0	0
C4BPB	NM_001017365	coding	3.83061	0	0	1.9723	0	0
C4orf19	NM_018302	coding	8.7863	0	0.516841	1.18545	0	2.34236
C4orf19	NM_001104629	coding	8.2137	0	0.483159	1.10667	0	2.18669
C4orf21	NM_018392	coding	19	0	0	1.38177	0	0
C4orf27	NM_017867	coding	13	0	0	5.24025	0	0
C4orf3	NM_001001701	coding	31.8764	0	0	5.50359	0	0
C4orf32	NM_152400	coding	9	0	0	1.6183	0	0
C4orf33	NM_173487	coding	6.86506	0.0021691	1	1.80817	0.015547	8.84738
C4orf33	NM_001099783	coding	10.1349	4.99783	0	3.12637	41.9537	0
C4orf46	NM_001008393	coding	14.44	0	0	2.00566	0	0
C4orf48	NM_001168243	coding	2.98589	0	0	3.38009	0	0
C5orf15	NM_020199	coding	89	1	0	19.1252	5.84773	0
C5orf22	NM_018356	coding	37	0	0	5.02107	0	0
C5orf24	NM_001135586	coding	114.038	0	0	10.9969	0	0
C5orf28	NM_022483	coding	19	1	0	3.3731	4.8311	0
C5orf30	NM_033211	coding	24	0	0	3.90829	0	0
C5orf34	NM_198566	coding	4	1	0	0.774047	5.26596	0
C5orf42	NM_023073	coding	87	0	0	3.80787	0	0
C5orf45	NM_016175	coding	5.82262	0	0	2.37639	0	0
C5orf46	NM_206966	coding	2	0	0	1.80873	0	0
C5orf51	NM_175921	coding	78	1	0	7.3215	2.55432	0
C5orf54	NM_022090	coding	18	0	0	3.1432	0	0
C5orf56	NR_045116	nonCoding	2	0	0	1.2178	0	0
C5orf63	NM_001164478	coding	2	0	0	1.01483	0	0
C6orf1	NM_178508	coding	4.48279	8.18287e-07	0	1.82198	9.05047e-06	0
C6orf1	NM_001008704	coding	0.133903	1.92037	0	0.0734166	28.6524	0
C6orf1	NM_001008703	coding	54.3833	0.0796258	0	27.9421	1.11331	0
C6orf106	NM_024294	coding	208.113	0.191261	0	23.0895	0.577448	0
C6orf106	NM_022758	coding	86.8873	1.80874	0	10.0922	5.7171	0
C6orf120	NM_001029863	coding	30	0	0	3.54678	0	0
C6orf136	NM_001109938	coding	4.99986	0	0	1.70665	0	0
C6orf203	NM_016487	coding	2	0	0	1.0761	0	0
C6orf211	NM_024573	coding	23	0	0	4.38328	0	0
C6orf223	NM_001171992	coding	8.22879	0	0	1.11329	0	0
C6orf223	NM_153246	coding	14.7712	0	0	2.02244	0	0
C6orf226	NM_001008739	coding	3	0	0	2.66394	0	0
C6orf47	NM_021184	coding	23	1	0	4.55507	5.38936	0
C6orf48	NM_001040437	coding	75.6295	5.95434e-06	0.00301699	44.0272	9.43265e-05	0.058996
C6orf48	NM_001040438	coding	76.3705	6.99999	0.996983	50.0457	124.827	21.9456
C6orf57	NM_145267	coding	19	0	0	17.7393	0	0
C6orf62	NM_030939	coding	181	1	0	35.8899	5.3959	0
C6orf70	NM_018341	coding	18	0	0	4.2459	0	0
C6orf89	NM_152734	coding	178	3	0	12.9239	5.92742	0
C7orf25	NM_024054	coding	3.7349	0	0	1.00589	0	0
C7orf26	NM_024067	coding	25	0	0	6.40571	0	0
C7orf29	NM_138434	coding	7	0	0	1.19386	0	0
C7orf41	NM_152793	coding	24	0	1	2.02339	0	2.83195
C7orf49	NM_001243754	coding	2.76919e-05	0	0.996301	9.45895e-06	0	11.4314
C7orf49	NM_001243751	coding	23.3918	0	0.000918399	6.928	0	0.00913681
C7orf49	NM_001243753	coding	10.9822	0	0	3.51146	0	0
C7orf49	NM_001243749	coding	10.0919	0	0	2.59261	0	0
C7orf50	NM_001134396	coding	0.474196	0.552347	0	0.183888	5.82878	0
C7orf50	NM_001134395	coding	19.9407	0.265896	2	7.61826	2.76438	25.6664
C7orf50	NM_032350	coding	17.5851	0.181757	0	6.66636	1.87501	0
C7orf55	NM_197964	coding	16.9694	1	1.56649e-06	6.87423	11.0237	2.13158e-05
C7orf55-LUC7L2	NM_001244584	coding	0.17629	3.56787e-18	3	0.0314566	1.73246e-17	17.9814
C7orf60	NM_152556	coding	10	0	0	1.24344	0	0
C7orf73	NM_001130929	coding	15	0	0	2.94335	0	0
C8orf33	NM_023080	coding	101	2	0	18.9173	10.1939	0
C8orf42	NM_175075	coding	7.15613	0	0	1.02474	0	0
C8orf58	NM_173686	coding	0.128632	1	0	0.0309529	6.54819	0
C8orf58	NM_001013842	coding	12.8837	1	0	3.06412	6.47194	0
C8orf59	NM_001099672	coding	3.86795	0	0.104415	1.98112	0	1.79644
C8orf59	NM_001099673	coding	4.49649e-06	0	0.892424	2.40614e-06	0	16.0412
C8orf76	NM_032847	coding	16.4762	0	0	6.01791	0	0
C8orf82	NM_001001795	coding	13	0	0	3.29821	0	0
C8orf86	NM_207412	coding	0	1	0	0	5.9283	0
C9orf114	NM_016390	coding	71	2	0	8.11986	6.2243	0
C9orf123	NM_033428	coding	9	0	0	1.77453	0	0
C9orf139	NM_207511	coding	1	1	0	0.128484	3.49637	0
C9orf142	NM_183241	coding	14	0	0	8.45112	0	0
C9orf156	NM_016481	coding	11	0	0	3.27571	0	0
C9orf16	NM_024112	coding	31	2	0	21.3115	37.4156	0
C9orf3	NM_032823	coding	49.4509	0	0	8.29539	0	0
C9orf37	NM_032937	coding	17	1	0	5.73885	9.18641	0
C9orf40	NM_017998	coding	24	0	0	5.05977	0	0
C9orf41	NM_152420	coding	5	0	0	1.11757	0	0
C9orf64	NM_032307	coding	26	0	0	5.15337	0	0
C9orf69	NM_001256526	coding	50.3014	0	1.34137	8.79315	0	7.87648
C9orf69	NM_152833	coding	24.6986	0	0.658628	4.25532	0	3.8117
C9orf72	NM_018325	coding	14.5034	0	0	2.19146	0	0
C9orf78	NM_016520	coding	61	2	0	16.4467	14.674	0
C9orf85	NM_182505	coding	11	0	0	4.10024	0	0
C9orf89	NM_032310	coding	56	4	1	30.2972	58.8904	18.1733
C9orf9	NM_018956	coding	5	0	0	3.40866	0	0
C9orf91	NM_153045	coding	19	0	1	2.138	0	3.77984
CA12	NM_206925	coding	20.4247	0	0	2.5397	0	0
CA12	NM_001218	coding	13.5753	0	0	1.67399	0	0
CA13	NM_198584	coding	10	0	0	1.2715	0	0
CA5B	NM_007220	coding	16	0	0	1.30017	0	0
CA5BP1	NR_026551	nonCoding	7	0	0	3.45187	0	0
CAAP1	NM_024828	coding	25.1223	0	0	4.37446	0	0
CAAP1	NM_001167575	coding	7.87764	0	0	1.30055	0	0
CAB39	NM_016289	coding	107.434	0.432027	2	13.753	1.50501	8.60014
CAB39	NM_001130850	coding	0.193329	2.47507	3.38356e-15	0.0256463	8.9348	1.50772e-14
CAB39L	NM_001079670	coding	17	0	0	2.36526	0	0
CABLES1	NM_001100619	coding	25.4488	0	4.25076e-06	2.49233	0	1.39837e-05
CABLES2	NM_031215	coding	7	1	0	0.906514	3.52409	0
CACFD1	NM_017586	coding	23.2447	0	0	4.13566	0	0
CACNA1B	NM_000718	coding	0	1.67934	0.839669	0	2.28806	1.41217
CACNA1B	NM_001243812	coding	0	4.32066	2.16033	0	6.00145	3.70403
CACNB1	NM_199248	coding	5.31471	0	0	1.48522	0	0
CACNG4	NM_014405	coding	0	1	0	0	3.88882	0
CACTIN	NM_001080543	coding	19.1074	7.0409e-07	0	2.58438	2.59151e-06	0
CACTIN	NM_021231	coding	9.89261	2	0	1.81204	9.96911	0
CACUL1	NM_153810	coding	100	1	0	7.27248	1.97903	0
CACYBP	NM_014412	coding	69.9962	0	0	11.2123	0	0
CAD	NM_004341	coding	117	1	1	8.06828	1.87657	2.3164
CADM4	NM_145296	coding	5	0	0	1.1263	0	0
CALB2	NM_001740	coding	9.9998	0	0	3.33439	0	0
CALCOCO1	NM_020898	coding	37.3311	0.312714	0	6.00736	1.3694	0
CALCOCO1	NM_001143682	coding	7.45831	1.33206e-14	0	1.31032	6.36844e-14	0
CALCOCO2	NM_005831	coding	64.8293	0.545669	0.0482122	8.63039	1.97678	0.215593
CALCOCO2	NM_001261393	coding	0.103822	3.00544	0.265544	0.014311	11.2735	1.22952
CALCOCO2	NM_001261395	coding	28.8519	5.14113e-15	0.646583	4.04988	1.9638e-14	3.04867
CALD1	NM_004342	coding	51.788	1.34444	0.138193	5.68272	4.01457	0.509368
CALD1	NM_033140	coding	82.7664	1.46517	2.70268	9.65015	4.64878	10.5851
CALD1	NM_033139	coding	7.91308	0.595217	1.09795	0.905818	1.85413	4.22178
CALD1	NM_033157	coding	1.36741	0.594586	0.0611165	0.147568	1.74614	0.22155
CALHM3	NM_001129742	coding	1	0	1	0.29671	0	9.96669
CALM1	NM_006888	coding	225	4	2	25.9133	12.5363	7.7373
CALM2	NM_001743	coding	497	6	3	187.106	61.4685	37.9377
CALM3	NM_005184	coding	406	9	1	88.0952	53.1421	7.28861
CALR	NM_004343	coding	2211	41	7	567.114	286.178	60.3112
CALU	NM_001199671	coding	20.9488	0.000572209	0.000114442	1.66397	0.00123683	0.000305344
CALU	NM_001199673	coding	2.16479	3.81631	0.763262	0.2058	9.87286	2.43737
CALU	NM_001130674	coding	141.904	0.591273	0.118255	12.9866	1.47252	0.363528
CALU	NM_001219	coding	305.718	0.591273	0.118255	27.9784	1.47252	0.363528
CAMK1	NM_003656	coding	27	1	0	8.87028	8.94013	0
CAMK1D	NM_020397	coding	4.99999	0	0	1.42324	0	0
CAMK2D	NM_172128	coding	54.018	2.30906e-19	4.61813e-19	4.5841	5.33238e-19	1.31644e-18
CAMK2D	NM_172115	coding	17.104	0.512613	1.02523	3.43739	2.80343	6.921
CAMK2D	NM_172114	coding	0.0434586	0.222053	0.444106	0.00858601	1.19383	2.94727
CAMK2D	NM_172129	coding	0.0519294	0.265334	0.530668	0.0102969	1.43172	3.53456
CAMK2G	NM_001222	coding	18.1916	0.758477	0	2.45306	2.78324	0
CAMK2G	NM_172173	coding	16.2861	0.527789	0	2.17992	1.92245	0
CAMK2G	NM_172171	coding	20.1683	0.0683437	0	2.58926	0.238767	0
CAMK2G	NM_172170	coding	0.254713	0.301843	0	0.0337071	1.08698	0
CAMK2N1	NM_018584	coding	5	1	0	1.04246	5.67361	0
CAMKK1	NM_172206	coding	20.9121	0.679228	0	2.92868	2.58857	0
CAMKK1	NM_032294	coding	9.8759	0.320772	0	1.36208	1.2039	0
CAMKK2	NM_001270485	coding	19.5218	0.0196955	0.00984776	1.9335	0.0530839	0.0327628
CAMKK2	NM_001270486	coding	70.7772	1.94964	0.974821	7.69918	5.77133	3.562
CAMKK2	NM_172226	coding	29.9381	0.0302046	0.0151023	2.99115	0.0821217	0.0506846
CAMKMT	NM_024766	coding	7	0	0	2.20653	0	0
CAMLG	NM_001745	coding	48	0	0	10.4942	0	0
CAMSAP1	NM_015447	coding	62	1	1	3.98247	1.74796	2.15764
CAMSAP2	NM_203459	coding	81	0	1	5.40108	0	2.23983
CAMSAP3	NM_020902	coding	0	0	1.44532	0	0	5.79851
CAMSAP3	NM_001080429	coding	0	0	0.554684	0	0	2.18228
CAMTA1	NM_001195563	coding	8.64035	0	0	5.78579	0	0
CAMTA1	NM_001242701	coding	4.35909	0	0	2.16044	0	0
CAMTA1-IT1	ENST00000427317.1	nonCoding	1	0	0	1.34292	0	0
CAMTA2	NM_001171166	coding	22.473	0	0	2.50694	0	0
CAND1	NM_018448	coding	137	19	1	11.3664	42.8969	2.78689
CAND2	NM_001162499	coding	1	0	2	0.106743	0	7.17115
CANT1	NM_001159773	coding	151.337	2.50495	0	22.2097	10.0038	0
CANT1	NM_138793	coding	28.0128	0.155344	0	3.88427	0.586161	0
CANT1	NM_001159772	coding	10.65	0.33971	0	1.5005	1.30247	0
CANX	NM_001746	coding	720.817	0.150136	3.71106	71.3776	0.404568	12.3439
CANX	NM_001024649	coding	504.175	14.8499	6.28894	50.4654	40.4487	21.145
CAP1	NM_006367	coding	292.385	2.94626	0.841788	51.6829	14.1721	4.9982
CAP1	NM_001105530	coding	259.616	4.05374	1.15821	46.1905	19.6267	6.92193
[truncated: 14,089 more rows]

## Sheet: B
B. Estimation of read coverage (in percentage) and read count of transcript. The transcripts with >90% coverage for protein-coding sequence and exonic sequence (in case of non-coding transcript) of transcript isoforms on RefGene and/or GENCODE v14 gene models are shown.
symbol	acc		Read count				Percentage of read coverage
		gene type	MDA-MB-231 Cellular	Pooled exosomal samples	MDA-MB-231 Exosomal	MDA-MB-436 Exosomal	MDA-MB-231 Cellular	Pooled exosomal samples	MDA-MB-231 Exosomal	MDA-MB-436 Exosomal
CTNNA1	NM_001903	coding	168	7	6	1	0.941198	0.164645	0.152885	0.0117604
COPB1	NM_001144062	coding	294	1	1	0	0.974843	0.0394829	0.0394829	0
PUF60	NM_078480	coding	111	22	12	10	0.926786	0.475595	0.267262	0.286905
NDUFS1	NM_001199981	coding	123	2	2	0	0.970617	0.0515414	0.0515414	0
NDUFS1	NM_001199983	coding	119	1	1	0	0.969697	0.0377546	0.0377546	0
NDUFS1	NM_001199982	coding	113	1	1	0	0.967585	0.0410589	0.0410589	0
ITM2B	NM_021999	coding	36	1	1	0	0.947566	0.186017	0.186017	0
UCP2	NM_003355	coding	27	0	0	0	0.93871	0	0	0
GPKOW	NM_015698	coding	53	1	0	1	0.906359	0.0614955	0	0.0614955
SLC25A5	NM_001152	coding	166	6	3	3	1	0.317726	0.133779	0.183946
COX4I1	NM_001861	coding	239	28	16	12	1	0.933333	0.786275	0.886275
SEPT9	NM_001113494	coding	112	13	11	2	0.995272	0.537431	0.537431	0.0204886
RPL36A	NM_021029	coding	337	17	8	9	0.934732	0.738928	0.641026	0.662005
TAF9	NM_003187	coding	48	1	1	0	1	0.109434	0.109434	0
HMGCS1	NM_002130	coding	99	0	0	0	0.997441	0	0	0
PRKAG1	NM_002733	coding	35	1	1	0	0.923695	0.0491968	0.0491968	0
CCNI	NM_006835	coding	190	6	6	0	1	0.287478	0.287478	0
TXNIP	NM_006472	coding	1957	14	13	1	1	0.722789	0.67432	0.160714
FAM50A	NM_004699	coding	99	12	2	10	0.959804	0.370588	0.171569	0.24902
TLN1	NM_006289	coding	607	28	23	5	0.992788	0.213218	0.193286	0.0398636
PSMB5	NM_001130725	coding	167	6	6	0	1	0.689441	0.689441	0
IDH3G	NM_174869	coding	36	9	8	1	0.915136	0.442695	0.40245	0.125109
BACH1	NM_001186	coding	163	1	1	0	1	0.0529172	0.0529172	0
C14orf166	NM_016039	coding	107	3	3	0	1	0.485714	0.485714	0
ATP5O	NM_001697	coding	62	3	2	1	1	0.344237	0.176012	0.168224
NRD1	NM_001101662	coding	200	3	2	1	0.953125	0.0862269	0.0601852	0.0260417
C19orf10	NM_019107	coding	48	1	1	0	0.952107	0.0804598	0.0804598	0
RTN3	NM_201430	coding	38	0	0	0	0.933884	0	0	0
RRAS2	NM_001177315	coding	13	1	1	0	0.942708	0.265625	0.265625	0
EIF4G1	NM_198244	coding	556	6	6	0	0.998017	0.16171	0.16171	0
EIF4G1	NM_198241	coding	575	6	6	0	0.992917	0.152917	0.152917	0
EIF4G1	NM_198242	coding	529	6	6	0	1	0.170381	0.170381	0
TUFM	NM_003321	coding	167	5	3	2	0.987573	0.233187	0.118421	0.135234
NRD1	NM_002525	coding	203	3	2	1	0.932514	0.0814208	0.0568306	0.0245902
YIPF2	NM_024029	coding	57	4	3	1	1	0.356467	0.15878	0.197687
MRPS21	NM_018997	coding	20	2	0	2	1	0.253788	0	0.253788
AP2S1	NM_021575	coding	47	8	8	0	0.990476	0.504762	0.504762	0
NAA10	NM_003491	coding	70	5	0	5	0.988701	0.234463	0	0.234463
SLC9A3R2	NM_001252076	coding	63	3	3	0	0.972222	0.481481	0.481481	0
RAB10	NM_016131	coding	85	1	1	0	1	0.126036	0.126036	0
MYO1C	NM_033375	coding	274	21	20	1	0.993845	0.312601	0.293165	0.0194363
PNMA1	NM_006029	coding	54	0	0	0	0.968927	0	0	0
LAMB3	NM_000228	coding	358	9	9	0	1	0.208014	0.208014	0
CORO1C	NM_001276471	coding	333	2	1	1	1	0.0884211	0.0308772	0.0575439
UBE2L3	NM_003347	coding	41	3	3	0	1	0.488172	0.488172	0
CTGF	NM_001901	coding	110	8	8	0	0.92381	0.26	0.26	0
SNX17	NM_014748	coding	112	0	0	0	0.991507	0	0	0
RTN3	NM_001265591	coding	36	0	0	0	0.965891	0	0	0
FGF5	NM_033143	coding	23	0	0	0	0.954301	0	0	0
PREB	NM_013388	coding	49	0	0	0	0.984051	0	0	0
GRAMD3	NM_001146319	coding	56	0	0	0	0.966518	0	0	0
UBE2D3	NM_181886	coding	61	1	1	0	1	0.119369	0.119369	0
RBM15	NM_022768	coding	98	0	0	0	0.906271	0	0	0
GADD45GIP1	NM_052850	coding	89	13	7	6	0.926756	0.523169	0.475336	0.239163
ALKBH7	NM_032306	coding	38	2	1	1	0.947447	0.123123	0.102102	0.0915916
CD2AP	NM_012120	coding	149	0	0	0	0.994792	0	0	0
TBCB	NM_001281	coding	75	3	3	0	0.948299	0.155102	0.155102	0
SPINT2	NM_021102	coding	139	1	1	0	1	0.111989	0.111989	0
RGS3	NM_001276262	coding	22	0	0	0	0.905325	0	0	0
GOLGA4	NM_001172713	coding	224	4	3	1	0.918746	0.0252525	0.0199049	0.00534759
TNIP2	NM_001161527	coding	28	2	2	0	0.914345	0.219814	0.219814	0
VDAC2	NM_003375	coding	83	1	0	1	1	0.0745763	0	0.0745763
ZNF581	NM_016535	coding	23	2	2	0	0.951178	0.0707071	0.0707071	0
LY6E	NM_002346	coding	40	3	3	0	0.984848	0.191919	0.191919	0
P4HA2	NM_001017973	coding	52	0	0	0	0.93633	0	0	0
RPL3	NM_001033853	coding	1538	76	59	17	1	0.943662	0.943662	0.602817
BCAP31	NM_001256447	coding	98	2	1	1	1	0.153846	0.0728745	0.0809717
AKAP2	NM_001004065	coding	202	7	3	4	0.915701	0.122585	0.0663857	0.0561995
SERTAD3	NM_203344	coding	26	1	1	0	0.910321	0.0879865	0.0879865	0
EEF1D	NM_001130055	coding	482	52	21	31	1	0.929078	0.892435	0.747045
QKI	NM_006775	coding	77	2	2	0	0.987329	0.121832	0.121832	0
CLDN7	NM_001185022	coding	47	0	0	0	0.995283	0	0	0
NEK6	NM_001166170	coding	99	3	1	2	0.972399	0.29724	0.129512	0.167728
NUDT3	NM_006703	coding	97	1	1	0	1	0.217726	0.217726	0
PTGR1	NM_012212	coding	57	3	1	2	0.936364	0.225253	0.146465	0.145455
MYC	NM_002467	coding	412	3	3	0	1	0.113553	0.113553	0
UGP2	NM_001001521	coding	73	2	1	1	0.904953	0.0696118	0.0254351	0.0441767
PMP22	NM_153321	coding	32	1	1	0	1	0.275362	0.275362	0
MDH2	NM_005918	coding	87	9	3	6	0.933137	0.256637	0.150442	0.216323
HMGB3	NM_005342	coding	64	1	0	1	1	0.039801	0	0.039801
BCL2L13	NM_001270729	coding	28	0	0	0	0.970165	0	0	0
BCL2L13	NM_001270728	coding	4	0	0	0	0.910394	0	0	0
TWF1	NM_001242397	coding	48	0	0	0	0.947858	0	0	0
PPP2R4	NM_178003	coding	86	2	1	1	1	0.121749	0.120567	0.00118203
FRMD6	NM_001267047	coding	203	1	1	0	1	0.118239	0.118239	0
PIH1D1	NM_017916	coding	81	3	3	0	0.935853	0.284078	0.284078	0
EIF2AK1	NM_014413	coding	79	2	0	2	0.945061	0.0559958	0	0.0559958
CCDC85B	NM_006848	coding	65	1	1	0	1	0.0558292	0.0558292	0
PNP	NM_000270	coding	83	1	1	0	1	0.129885	0.129885	0
UQCRH	NM_006004	coding	97	7	1	6	1	0.753623	0.057971	0.753623
ALCAM	NM_001243280	coding	158	0	0	0	1	0	0	0
SNRNP35	NM_022717	coding	23	1	1	0	0.939271	0.252362	0.252362	0
SEC23B	NM_001172746	coding	158	1	1	0	0.983556	0.0471111	0.0471111	0
RAB9A	NM_004251	coding	25	2	0	2	0.943894	0.0528053	0	0.0528053
XPNPEP1	NM_020383	coding	86	0	0	0	0.912044	0	0	0
CAST	NM_173060	coding	207	3	2	1	1	0.0543426	0.0257157	0.0286269
MANBAL	NM_022077	coding	17	0	0	0	1	0	0	0
UQCRB	NM_001199975	coding	92	2	2	0	1	0.670833	0.670833	0
PRC1	NM_001267580	coding	140	3	3	0	1	0.15526	0.15526	0
GEM	NM_005261	coding	59	0	0	0	0.993266	0	0	0
ITGB1BP1	NM_004763	coding	28	2	0	2	1	0.245439	0	0.245439
SLC39A10	NM_020342	coding	104	6	6	0	0.985978	0.106971	0.106971	0
KRT18	NM_199187	coding	249	17	17	0	0.942769	0.603248	0.603248	0
WARS	NM_173701	coding	86	0	0	0	0.977401	0	0	0
TCEB1	NM_001204862	coding	21	0	0	0	0.943953	0	0	0
CHMP3	NM_001005753	coding	82	2	1	1	1	0.549894	0.227176	0.352442
SEPT7	NM_001788	coding	119	2	0	2	0.974848	0.11814	0	0.11814
CCNB1IP1	NM_182849	coding	41	2	2	0	0.980815	0.360911	0.360911	0
TRAPPC3	NM_014408	coding	45	2	2	0	1	0.143646	0.143646	0
PSMD12	NM_002816	coding	47	1	0	1	0.967177	0.0889861	0	0.0889861
STX10	NM_001271610	coding	74	0	0	0	0.986505	0	0	0
STX10	NM_001271611	coding	76	0	0	0	0.983416	0	0	0
NPTN	NM_001161364	coding	40	4	0	4	0.998805	0.237754	0	0.237754
PPP1R15A	NM_014330	coding	289	4	2	2	0.918519	0.209383	0.124938	0.0844444
TRAM1	NM_014294	coding	84	3	3	0	1	0.105778	0.105778	0
COL8A1	NM_001850	coding	333	2	2	0	0.991946	0.061745	0.061745	0
PSMD3	NM_002809	coding	99	1	0	1	0.972586	0.0442368	0	0.0442368
NSMF	NM_015537	coding	86	2	1	1	0.919345	0.116572	0.0819156	0.0346566
G3BP2	NM_203504	coding	170	3	2	1	0.96	0.0733333	0.0562963	0.017037
G3BP2	NM_203505	coding	171	3	2	1	0.932367	0.068323	0.05245	0.015873
PAFAH1B3	NM_002573	coding	40	3	3	0	1	0.390805	0.390805	0
CAMTA1	NM_001195563	coding	9	0	0	0	1	0	0	0
CSF1	NM_172211	coding	86	5	5	0	0.928664	0.191958	0.191958	0
COPB2	NM_004766	coding	184	1	1	0	0.978684	0.0161705	0.0161705	0
RHNO1	NM_001252499	coding	17	1	1	0	0.960948	0.0990237	0.0990237	0
MSMO1	NM_006745	coding	131	5	5	0	0.994331	0.306122	0.306122	0
STAU1	NM_004602	coding	87	2	1	1	1	0.0731053	0.0073776	0.0657277
FBXW5	NM_018998	coding	153	5	3	2	0.964139	0.179894	0.126396	0.0534979
TIPARP	NM_001184717	coding	116	0	0	0	0.951874	0	0	0
VIM	NM_003380	coding	3059	138	97	41	1	0.902926	0.800143	0.591006
EFTUD2	NM_001142605	coding	199	5	5	0	0.980455	0.1457	0.1457	0
FGFR1	NM_023105	coding	144	8	6	2	1	0.189827	0.135332	0.0544959
IST1	NM_001270976	coding	39	3	3	0	0.909649	0.163158	0.163158	0
UBA6	NM_018227	coding	105	2	2	0	0.955999	0.0424185	0.0424185	0
SLU7	NM_006425	coding	71	2	0	2	0.934128	0.00511073	0	0.00511073
RRBP1	NM_001042576	coding	387	14	12	2	0.995569	0.206544	0.206544	0.0289707
HNRNPUL1	NM_144732	coding	114	6	4	2	0.926464	0.217525	0.107442	0.11889
DHCR7	NM_001163817	coding	66	1	1	0	0.94888	0.0497199	0.0497199	0
CHMP2A	NM_014453	coding	92	2	1	1	0.986547	0.197309	0.112108	0.0852018
TUBA1A	NM_001270400	coding	165	0	0	0	0.948841	0	0	0
TAF11	NM_005643	coding	23	0	0	0	0.95283	0	0	0
MORF4L2	NM_001142425	coding	348	9	7	2	1	0.514418	0.412918	0.129181
MSRB3	NM_001193461	coding	12	0	0	0	0.987455	0	0	0
RPL9	NM_000661	coding	1705	87	32	55	1	0.941278	0.860104	0.882556
ANAPC13	NM_001242374	coding	16	0	0	0	1	0	0	0
DCXR	NM_001195218	coding	40	0	0	0	0.9369	0	0	0
VDAC1	NM_003374	coding	91	7	7	0	1	0.388498	0.388498	0
DHCR7	NM_001360	coding	66	1	1	0	0.94888	0.0497199	0.0497199	0
CRCP	NM_001040648	coding	10	1	0	1	1	0.143519	0	0.143519
PSMA1	NM_002786	coding	147	0	0	0	1	0	0	0
RPS3A	NM_001267699	coding	212	6	2	4	1	0.480226	0.0960452	0.418079
H2AFY	NM_138609	coding	162	6	5	1	1	0.40991	0.373874	0.036036
BSCL2	NM_032667	coding	54	1	1	0	0.924812	0.0918964	0.0918964	0
IL32	NM_001012634	coding	74	7	4	3	0.984221	0.497041	0.345168	0.238659
SNX12	NM_001256185	coding	25	0	0	0	1	0	0	0
PLA2G16	NM_001128203	coding	66	4	4	0	1	0.306748	0.306748	0
INSIG1	NM_005542	coding	158	1	0	1	0.978417	0.11271	0	0.11271
THRAP3	NM_005119	coding	254	7	6	1	0.999651	0.0589261	0.0460251	0.012901
MMP1	NM_001145938	coding	394	8	8	0	0.999175	0.249175	0.249175	0
TNIP1	NM_001258455	coding	252	15	8	7	1	0.437464	0.263525	0.179174
RPL15	NM_001253384	coding	355	17	11	6	0.938356	0.926941	0.926941	0.285388
CCT8	NM_006585	coding	284	4	1	3	1	0.167577	0.0558591	0.111718
NET1	NM_005863	coding	171	36	30	6	1	0.798649	0.743401	0.159607
KLC1	NM_182923	coding	102	3	3	0	0.937282	0.0766551	0.0766551	0
RAB32	NM_006834	coding	104	3	1	2	0.927729	0.30236	0.120944	0.181416
LRPAP1	NM_002337	coding	113	2	1	1	0.970205	0.0810056	0.0623836	0.0223464
UBE2A	NM_003336	coding	54	1	0	1	0.991285	0.148148	0	0.148148
TP53	NM_000546	coding	44	14	11	3	0.945854	0.316413	0.316413	0.109983
WDR54	NM_032118	coding	48	1	1	0	1	0.120398	0.120398	0
SPINT2	NM_001166103	coding	127	1	1	0	1	0.144558	0.144558	0
SUN1	NM_001171944	coding	201	3	3	0	1	0.151781	0.151781	0
ARMC6	NM_001199196	coding	58	5	4	1	0.959495	0.176627	0.129482	0.0471448
RBMX	NM_002139	coding	89	1	1	0	0.971939	0.0994898	0.0994898	0
MCFD2	NM_001171506	coding	62	1	1	0	1	0.0770975	0.0770975	0
LRRC20	NM_018239	coding	20	0	0	0	1	0	0	0
MCFD2	NM_001171509	coding	37	1	1	0	1	0.119298	0.119298	0
CAPNS1	NM_001003962	coding	250	28	13	15	0.920694	0.873606	0.841388	0.2057
CUTA	NM_015921	coding	50	5	5	0	1	0.660297	0.660297	0
RASSF3	NM_178169	coding	28	3	3	0	0.909344	0.383543	0.383543	0
GABARAP	NM_007278	coding	84	4	2	2	1	0.483051	0.341808	0.141243
CAB39	NM_016289	coding	42	0	0	0	0.904483	0	0	0
PHF1	NM_024165	coding	89	4	4	0	0.940728	0.125587	0.125587	0
GEMIN2	NM_003616	coding	11	0	0	0	0.913405	0	0	0
BAG6	NM_001199697	coding	366	11	10	1	0.9941	0.327802	0.317478	0.0103245
BAG6	NM_001199698	coding	405	12	11	1	0.985158	0.305504	0.277365	0.0281385
FAM213A	NM_001243780	coding	26	1	1	0	0.981159	0.223188	0.223188	0
FAM213A	NM_001243781	coding	26	1	1	0	1	0.234399	0.234399	0
ELOVL5	NM_001242830	coding	156	2	2	0	1	0.205323	0.205323	0
ADAR	NM_001193495	coding	257	3	3	0	0.984621	0.0675966	0.0675966	0
TPRKB	NM_016058	coding	10	0	0	0	0.912879	0	0	0
SHMT2	NM_001166357	coding	112	5	5	0	0.977961	0.258953	0.258953	0
PSMB6	NM_001270481	coding	145	4	4	0	0.968847	0.390966	0.390966	0
NDUFS5	NM_004552	coding	96	3	0	3	1	0.794393	0	0.794393
FDPS	NM_001135822	coding	124	3	0	3	0.963277	0.220339	0	0.220339
UXS1	NM_001253876	coding	45	1	1	0	0.947299	0.00395257	0.00395257	0
NR1H2	NM_001256647	coding	80	2	2	0	0.998168	0.206044	0.206044	0
RAB1B	NM_030981	coding	149	8	8	0	1	0.539604	0.539604	0
NEDD4L	NM_001144967	coding	125	1	1	0	0.905396	0.0119536	0.0119536	0
ETV1	NM_004956	coding	40	1	1	0	0.912134	0.0641562	0.0641562	0
CHTOP	NM_001244664	coding	41	1	1	0	0.995671	0.186147	0.186147	0
ARPC1A	NM_006409	coding	56	2	2	0	0.984726	0.268643	0.268643	0
CLCN3	NM_173872	coding	68	0	0	0	0.900038	0	0	0
MSANTD3	NM_080655	coding	42	1	1	0	0.954106	0.115942	0.115942	0
HN1	NM_016185	coding	31	5	5	0	1	0.531183	0.531183	0
NGRN	NM_001033088	coding	100	2	1	1	0.982877	0.149543	0.149543	0.0525114
SRSF4	NM_005626	coding	101	2	2	0	0.944108	0.160269	0.160269	0
FLII	NM_001256265	coding	702	17	17	0	0.998628	0.266667	0.266667	0
BRPF3	NM_015695	coding	109	9	9	0	0.914041	0.10586	0.10586	0
PLEKHA1	NM_021622	coding	25	0	0	0	0.930041	0	0	0
GAPDH	NM_002046	coding	2730	203	99	104	1	0.987103	0.946429	0.876984
RPL28	NM_001136134	coding	531	43	36	7	0.912602	0.623984	0.623984	0.506098
RPL28	NM_001136135	coding	533	43	36	7	0.913725	0.601961	0.601961	0.488235
TRA2B	NM_004593	coding	81	2	0	2	0.961938	0.2203	0	0.2203
LONP1	NM_001276480	coding	102	2	2	0	0.947644	0.0881326	0.0881326	0
BBX	NM_001276286	coding	120	4	4	0	0.941706	0.152093	0.152093	0
CUL4A	NM_003589	coding	63	1	0	1	0.936364	0.0540404	0	0.0540404
NCOA4	NM_001145263	coding	156	1	0	1	0.991328	0.0368564	0	0.0368564
NCOA4	NM_001145261	coding	156	1	0	1	0.973587	0.0359218	0	0.0359218
NCOA4	NM_001145260	coding	156	1	0	1	0.940604	0.0348182	0	0.0348182
NAA38	NM_016200	coding	12	0	0	0	1	0	0	0
GUK1	NM_001159391	coding	103	19	15	4	1	0.867003	0.808081	0.282828
PKM	NM_001206799	coding	732	51	42	9	1	0.903786	0.823091	0.373681
METTL3	NM_019852	coding	101	0	0	0	0.987952	0	0	0
SSH1	NM_001161331	coding	140	2	2	0	0.909091	0.0326705	0.0326705	0
OCIAD2	NM_152398	coding	49	0	0	0	1	0	0	0
GSN	NM_000177	coding	150	3	3	0	0.921669	0.0774798	0.0774798	0
CD40	NM_001250	coding	60	4	4	0	0.958034	0.0983213	0.0983213	0
CCNB1IP1	NM_021178	coding	41	2	2	0	0.980815	0.360911	0.360911	0
CTBP1	NM_001328	coding	143	4	4	0	0.95994	0.216931	0.216931	0
PPHLN1	NM_201438	coding	32	1	1	0	0.960103	0.118404	0.118404	0
FADS2	NM_004265	coding	121	3	3	0	0.983521	0.194757	0.194757	0
CKAP4	NM_006825	coding	684	4	3	1	0.916528	0.210061	0.14262	0.0674406
SLC9A3R2	NM_001252073	coding	63	3	3	0	0.973568	0.45815	0.45815	0
RPS21	NM_001024	coding	268	27	15	12	1	1	1	0.72619
SLC9A3R2	NM_001252075	coding	63	3	3	0	0.973333	0.462222	0.462222	0
RTN4	NM_007008	coding	80	1	1	0	0.956667	0.115	0.115	0
RGS3	NM_134427	coding	22	0	0	0	0.905325	0	0	0
ZFAND5	NM_006007	coding	38	0	0	0	0.911215	0	0	0
COPS7A	NM_001164093	coding	42	3	3	0	1	0.310386	0.310386	0
SEC23A	NM_006364	coding	220	0	0	0	1	0	0	0
RABAC1	NM_006423	coding	62	5	5	0	0.956989	0.182796	0.182796	0
LDHB	NM_001174097	coding	247	7	6	1	1	0.276617	0.239801	0.0368159
MAPK14	NM_139014	coding	111	0	0	0	1	0	0	0
DRG1	NM_004147	coding	58	5	4	1	0.975543	0.359601	0.359601	0.0661232
SEPT2	NM_001008491	coding	126	4	2	2	1	0.116022	0.104052	0.116022
C17orf62	NM_001033046	coding	13	0	0	0	0.932624	0	0	0
ACTR2	NM_001005386	coding	104	2	2	0	0.9875	0.0358333	0.0358333	0
TCEAL1	NM_001006640	coding	25	0	0	0	1	0	0	0
PGLS	NM_012088	coding	72	2	1	1	0.936937	0.163449	0.100386	0.0630631
POMGNT1	NM_017739	coding	175	7	4	3	1	0.276853	0.195663	0.0811901
TSN	NM_001261401	coding	22	0	0	0	0.982103	0	0	0
HMGB2	NM_002129	coding	233	4	4	0	1	0.571429	0.571429	0
JKAMP	NM_001098625	coding	59	0	0	0	0.916122	0	0	0
FAM129B	NM_001035534	coding	1093	40	31	9	0.961853	0.662579	0.570391	0.249773
ERCC1	NM_001983	coding	69	4	4	0	0.979866	0.334452	0.334452	0
KIFC3	NM_005550	coding	301	7	7	0	0.95004	0.177458	0.177458	0
PDIA4	NM_004911	coding	409	9	9	0	1	0.343137	0.343137	0
NSA2	NM_001271665	coding	79	0	0	0	1	0	0	0
UQCRC2	NM_003366	coding	97	2	2	0	0.978708	0.092511	0.092511	0
PCMT1	NM_001252052	coding	60	0	0	0	0.956349	0	0	0
PCMT1	NM_001252050	coding	60	0	0	0	0.956175	0	0	0
PCMT1	NM_001252051	coding	58	0	0	0	0.956175	0	0	0
ADCK2	NM_052853	coding	55	0	0	0	0.903775	0	0	0
NDUFB11	NM_019056	coding	50	3	3	0	1	0.660569	0.660569	0
OSGEP	NM_017807	coding	35	1	1	0	0.940476	0.0357143	0.0357143	0
GPN3	NM_001164373	coding	17	0	0	0	0.957062	0	0	0
NUDT21	NM_007006	coding	31	0	0	0	1	0	0	0
PSMA3	NM_152132	coding	55	0	0	0	1	0	0	0
YIF1B	NM_001145461	coding	37	1	1	0	1	0.100671	0.100671	0
SLC35E1	NM_024881	coding	102	0	0	0	0.91322	0	0	0
UBB	NM_018955	coding	1132	41	36	5	1	0.976812	0.976812	0.488406
UCK2	NM_012474	coding	60	1	0	1	0.998728	0.0508906	0	0.0508906
C19orf70	NM_205767	coding	26	3	3	0	0.97479	0.52381	0.52381	0
SRP68	NM_001260503	coding	35	1	1	0	1	0.102653	0.102653	0
MBNL1	NM_207292	coding	46	0	0	0	0.990117	0	0	0
CMPK1	NM_016308	coding	51	0	0	0	1	0	0	0
CDV3	NM_017548	coding	48	0	0	0	0.908623	0	0	0
SERF2	NM_001199876	coding	197	8	5	3	1	0.609453	0.606965	0.231343
GNG10	NM_001017998	coding	14	0	0	0	1	0	0	0
GOLGA7	NM_001002296	coding	18	0	0	0	1	0	0	0
CTBP2	NM_001329	coding	103	1	0	1	0.926009	0.0164425	0	0.0164425
STAT3	NM_139276	coding	92	3	2	1	0.93342	0.0817121	0.0505837	0.0311284
EIF3B	NM_001037283	coding	247	3	0	3	0.920654	0.0674847	0	0.0674847
APLP2	NM_001642	coding	565	9	9	0	0.969459	0.230803	0.230803	0
CTNND1	NM_001331	coding	157	0	0	0	0.947983	0	0	0
SP1	NM_003109	coding	69	2	2	0	0.904579	0.129226	0.129226	0
TBRG4	NM_001261834	coding	179	6	4	2	0.996371	0.131156	0.131156	0.0274754
CD44	NM_001202557	coding	477	20	15	5	1	0.666667	0.587571	0.305085
BRD2	NM_005104	coding	255	6	3	3	0.988362	0.124273	0.0777224	0.0465503
MCTS1	NM_001137554	coding	40	0	0	0	0.974499	0	0	0
FAM91A1	NM_144963	coding	75	0	0	0	0.932062	0	0	0
SLC25A3	NM_002635	coding	341	3	3	0	1	0.209024	0.209024	0
MT1X	NM_005952	coding	20	0	0	0	1	0	0	0
RER1	NM_007033	coding	26	1	0	1	0.939086	0.0456853	0	0.0456853
HIST1H3H	NM_003536	coding	594	3	3	0	1	0.486618	0.486618	0
MSANTD3	NM_001198806	coding	42	1	1	0	0.954106	0.115942	0.115942	0
YIPF5	NM_001271732	coding	42	0	0	0	0.905229	0	0	0
UAP1	NM_003115	coding	227	0	0	0	1	0	0	0
LRRC41	NM_006369	coding	110	2	2	0	0.96146	0.097171	0.097171	0
ANXA11	NM_001157	coding	96	5	2	3	0.945982	0.158103	0.112648	0.071805
WDFY1	NM_020830	coding	65	4	3	1	0.969992	0.14193	0.0851582	0.0567721
RBBP7	NM_002893	coding	196	2	1	1	1	0.0813772	0.0312989	0.0500782
AKT1	NM_001014432	coding	192	6	3	3	1	0.227997	0.167706	0.0741511
MORF4L2	NM_001142431	coding	348	9	7	2	1	0.514418	0.412918	0.129181
MORF4L2	NM_001142432	coding	348	9	7	2	1	0.514418	0.412918	0.129181
ZNRD1	NM_170783	coding	31	2	2	0	1	0.354331	0.354331	0
MRPL9	NM_031420	coding	34	0	0	0	0.91791	0	0	0
VAMP4	NM_001185127	coding	11	0	0	0	0.926714	0	0	0
APP	NM_001204301	coding	881	15	14	1	1	0.369633	0.348384	0.0212483
APP	NM_001204303	coding	798	15	14	1	1	0.370206	0.346608	0.0235988
APP	NM_001204302	coding	879	15	14	1	1	0.379201	0.357402	0.0217984
PICALM	NM_001206947	coding	205	1	0	1	1	0.0344203	0	0.0344203
SLC16A3	NM_001206950	coding	341	7	7	0	0.98784	0.34907	0.34907	0
HMGA1	NM_002131	coding	426	21	20	1	1	0.731959	0.731959	0.161512
NR3C1	NM_000176	coding	147	2	2	0	0.989717	0.0732648	0.0732648	0
APEX1	NM_001641	coding	75	1	1	0	1	0.0835946	0.0835946	0
NOP16	NM_001256539	coding	76	3	2	1	0.953782	0.393557	0.285714	0.107843
ZRANB2	NM_005455	coding	41	0	0	0	0.952233	0	0	0
H2AFV	NM_201517	coding	82	4	4	0	1	0.32967	0.32967	0
UBE2D3	NM_181888	coding	61	1	1	0	1	0.119369	0.119369	0
ANXA6	NM_001193544	coding	471	9	7	2	1	0.257529	0.220145	0.0732087
SERPINA1	NM_001002236	coding	87	1	1	0	0.9642	0.0533015	0.0533015	0
ZNF259	NM_003904	coding	103	2	1	1	0.947826	0.0811594	0.065942	0.0152174
OCIAD1	NM_001168254	coding	65	1	0	1	0.981408	0.146082	0	0.146082
BRK1	NM_018462	coding	35	1	0	1	0.995614	0.407895	0	0.407895
RGMB	NM_001012761	coding	345	3	3	0	1	0.0974252	0.0974252	0
PRMT5	NM_001039619	coding	187	2	1	1	0.968867	0.10789	0.0601181	0.0477724
TFG	NM_001195478	coding	77	6	4	2	1	0.237739	0.112219	0.12552
LAYN	NM_178834	coding	91	1	1	0	0.960889	0.110222	0.110222	0
AES	NM_001130	coding	104	1	0	1	1	0.104377	0	0.104377
SEPT9	NM_001113496	coding	93	13	11	2	1	0.619048	0.619048	0.0257937
NRP1	NM_001244973	coding	264	2	2	0	0.992366	0.044711	0.044711	0
NRP1	NM_001244972	coding	264	2	2	0	0.992375	0.0446623	0.0446623	0
TMEM230	NM_001009924	coding	28	1	1	0	1	0.198347	0.198347	0
TMEM230	NM_001009925	coding	28	1	1	0	1	0.198347	0.198347	0
AGPAT2	NM_006412	coding	63	2	2	0	0.934289	0.164875	0.164875	0
PPHLN1	NM_201440	coding	42	1	1	0	0.980208	0.0958333	0.0958333	0
BABAM1	NM_001033549	coding	162	6	6	0	0.99899	0.374747	0.374747	0
MAPK14	NM_001315	coding	117	0	0	0	0.989843	0	0	0
DDX47	NM_016355	coding	70	1	0	1	1	0.0204678	0	0.0204678
NR1D2	NM_005126	coding	55	0	0	0	0.908621	0	0	0
TGM2	NM_004613	coding	321	41	41	0	0.988857	0.38905	0.38905	0
GMPR2	NM_001002001	coding	65	0	0	0	1	0	0	0
CTSC	NM_001814	coding	122	0	0	0	1	0	0	0
TRPC4AP	NM_015638	coding	193	1	1	0	0.920217	0.0488722	0.0488722	0
RAB34	NM_001144942	coding	106	5	4	1	1	0.212963	0.212963	0.0634921
P4HA2	NM_004199	coding	52	0	0	0	0.919776	0	0	0
NAMPT	NM_005746	coding	623	2	2	0	1	0.144309	0.144309	0
PLD3	NM_001031696	coding	84	4	4	0	0.982349	0.242363	0.242363	0
CUTA	NM_001014838	coding	50	5	5	0	1	0.660297	0.660297	0
SLC3A2	NM_001012664	coding	220	9	5	4	0.998828	0.280023	0.175747	0.179848
NR3C1	NM_001204258	coding	146	2	2	0	0.996897	0.0757979	0.0757979	0
NR3C1	NM_001204259	coding	133	2	2	0	0.996633	0.0644541	0.0644541	0
UBE2I	NM_194259	coding	51	1	1	0	1	0.327044	0.327044	0
NCKAP1	NM_013436	coding	219	0	0	0	0.963094	0	0	0
PKM	NM_002654	coding	758	50	41	9	1	0.909148	0.827694	0.377193
LSM12	NM_152344	coding	86	2	0	2	1	0.0493197	0	0.0493197
GBP3	NM_018284	coding	104	0	0	0	0.939038	0	0	0
TPGS2	NM_001271955	coding	16	1	1	0	0.97201	0.0661578	0.0661578	0
TPGS2	NM_001271951	coding	34	1	1	0	0.91694	0.0284153	0.0284153	0
SF3B5	NM_031287	coding	77	8	3	5	1	0.931034	0.785441	0.298851
UBE2E1	NM_182666	coding	89	2	2	0	1	0.146893	0.146893	0
DYRK2	NM_003583	coding	40	0	0	0	0.959672	0	0	0
CYB5R3	NM_000398	coding	59	1	1	0	0.985651	0.156733	0.156733	0
GEMIN2	NM_001009182	coding	11	0	0	0	0.908521	0	0	0
POLD2	NM_001127218	coding	127	3	3	0	1	0.103546	0.103546	0
DDX17	NM_006386	coding	210	2	1	1	0.976256	0.0639269	0.0310502	0.0328767
NDUFB8	NM_005004	coding	51	0	0	0	1	0	0	0
NDUFAB1	NM_005003	coding	34	1	1	0	0.942675	0.0764331	0.0764331	0
PPP1R12A	NM_001244990	coding	168	0	0	0	0.942102	0	0	0
KLHDC3	NM_057161	coding	113	0	0	0	1	0	0	0
FUBP1	NM_003902	coding	97	5	3	2	0.991731	0.140052	0.10646	0.0335917
CAST	NM_001190442	coding	207	3	2	1	0.968391	0.0536398	0.0253831	0.0282567
MARK3	NM_001128920	coding	74	1	1	0	0.901961	0.015873	0.015873	0
PTDSS1	NM_014754	coding	59	0	0	0	0.95429	0	0	0
ZNF146	NM_001099639	coding	54	2	2	0	0.979522	0.0557452	0.0557452	0
ZNF146	NM_001099638	coding	54	2	2	0	0.979522	0.0557452	0.0557452	0
GALNT10	NM_198321	coding	130	2	1	1	0.945916	0.0165563	0.00441501	0.0121413
FAM3C	NM_001040020	coding	77	1	1	0	1	0.210526	0.210526	0
HIST1H2BD	NM_021063	coding	197	7	6	1	0.997375	0.787402	0.787402	0.149606
KRT18	NM_000224	coding	249	17	17	0	0.942769	0.603248	0.603248	0
RPL36A-HNRNPH2	NM_001199974	coding	300	16	9	7	0.918129	0.611111	0.611111	0.502924
ISCU	NM_014301	coding	47	1	0	1	0.909091	0.107226	0	0.107226
NREP	NM_001142476	coding	16	0	0	0	1	0	0	0
CCNL2	NM_001039577	coding	23	0	0	0	0.930984	0	0	0
GNAI3	NM_006496	coding	76	1	1	0	0.991549	0.120188	0.120188	0
FOSL2	NM_005253	coding	122	1	1	0	0.957187	0.0611621	0.0611621	0
MRPS17	NM_015969	coding	18	0	0	0	1	0	0	0
PSMA5	NM_001199772	coding	113	0	0	0	1	0	0	0
EHD4	NM_139265	coding	134	0	0	0	0.919434	0	0	0
PSAP	NM_001042465	coding	704	14	10	4	1	0.346591	0.3125	0.0744949
PSAP	NM_001042466	coding	703	14	10	4	0.999367	0.347249	0.313093	0.0746363
DENND5A	NM_001243254	coding	177	4	4	0	0.935856	0.0657542	0.0657542	0
RIOK2	NM_018343	coding	46	5	2	3	0.951175	0.0994575	0.07173	0.0277275
ECI2	NM_206836	coding	110	0	0	0	0.978903	0	0	0
SNX17	NM_001267059	coding	112	0	0	0	0.995643	0	0	0
APBB2	NM_001166052	coding	23	0	0	0	0.968404	0	0	0
APBB2	NM_001166051	coding	23	0	0	0	0.968404	0	0	0
NDUFB2	NM_004546	coding	51	3	1	2	1	0.600629	0.238994	0.361635
ERGIC3	NM_198398	coding	151	9	8	1	0.987147	0.485861	0.484147	0.00342759
KIAA0101	NM_014736	coding	14	0	0	0	1	0	0	0
WBP1L	NM_001083913	coding	54	0	0	0	0.901099	0	0	0
DYNLT1	NM_006519	coding	28	0	0	0	1	0	0	0
CDC42EP3	NM_006449	coding	143	1	1	0	1	0.117647	0.117647	0
TOB2	NM_016272	coding	24	0	0	0	0.909179	0	0	0
NTMT1	NM_014064	coding	60	3	3	0	1	0.264881	0.264881	0
LSM5	NM_001139499	coding	20	4	1	3	1	0.820106	0.42328	0.820106
GTF2F2	NM_004128	coding	19	0	0	0	0.96	0	0	0
HSPE1	NM_002157	coding	43	0	0	0	1	0	0	0
STC1	NM_003155	coding	104	1	1	0	1	0.110215	0.110215	0
PCMT1	NM_005389	coding	60	0	0	0	0.961538	0	0	0
CAPRIN1	NM_203364	coding	292	8	4	4	1	0.188489	0.0834532	0.135731
CYB561	NM_001915	coding	24	0	0	0	0.988095	0	0	0
ENSA	NM_004436	coding	37	4	2	2	1	0.603825	0.478142	0.254098
LGALS3BP	NM_005567	coding	144	7	7	0	0.991468	0.248578	0.248578	0
MACF1	NM_012090	coding	543	8	4	4	0.927576	0.0260848	0.00914503	0.0169398
PNRC2	NM_017761	coding	23	0	0	0	0.995238	0	0	0
ZCCHC9	NM_032280	coding	32	6	6	0	0.997549	0.136029	0.136029	0
MDH1	NM_005917	coding	145	4	4	0	1	0.393035	0.393035	0
SENP3	NM_015670	coding	89	1	0	1	0.927536	0.0469565	0	0.0469565
EFTUD2	NM_004247	coding	202	5	5	0	0.981158	0.140459	0.140459	0
NRD1	NM_001242361	coding	177	2	1	1	0.924326	0.0487132	0.0300245	0.0186887
YWHAH	NM_003405	coding	76	0	0	0	0.932524	0	0	0
BCLAF1	NM_001077440	coding	108	3	2	1	0.98046	0.0436782	0.0229885	0.0314176
BCLAF1	NM_001077441	coding	89	3	2	1	0.991087	0.0913547	0.0672906	0.0365419
KLHL5	NM_001171654	coding	112	2	1	1	0.982425	0.137083	0.0949033	0.0421793
MYO1C	NM_001080779	coding	274	21	20	1	0.968358	0.302318	0.283521	0.018797
RSL24D1	NM_016304	coding	34	2	0	2	1	0.286585	0	0.286585
SCP2	NM_001007100	coding	43	1	1	0	1	0.200946	0.200946	0
LAMP2	NM_002294	coding	76	0	0	0	0.909976	0	0	0
MVB12A	NM_138401	coding	32	2	2	0	0.980535	0.126521	0.126521	0
MARCH7	NM_022826	coding	72	5	5	0	0.946099	0.228369	0.228369	0
TIMM9	NM_012460	coding	16	0	0	0	1	0	0	0
UBE2L6	NM_004223	coding	29	0	0	0	1	0	0	0
TMEM18	NM_152834	coding	30	0	0	0	0.971631	0	0	0
SDHC	NM_001035511	coding	18	0	0	0	0.997792	0	0	0
SRA1	NM_001035235	coding	30	1	1	0	0.95218	0.104079	0.104079	0
AP3M1	NM_207012	coding	32	0	0	0	0.910103	0	0	0
LSM5	NM_001130710	coding	20	4	1	3	1	0.820106	0.42328	0.820106
DDX39A	NM_005804	coding	104	7	1	6	0.999221	0.235981	0.0599688	0.176012
SPTSSA	NM_138288	coding	8	1	0	1	0.967593	0.310185	0	0.310185
GUK1	NM_001242839	coding	103	19	15	4	1	0.867003	0.808081	0.282828
CD99L2	NM_031462	coding	51	0	0	0	0.992395	0	0	0
FKBP2	NM_001135208	coding	33	4	4	0	0.988345	0.641026	0.641026	0
PDLIM5	NM_001256428	coding	119	5	5	0	0.951579	0.155789	0.155789	0
PDLIM5	NM_001256427	coding	116	5	5	0	0.940083	0.125344	0.125344	0
PDLIM5	NM_001256425	coding	60	2	2	0	0.915441	0.142157	0.142157	0
ARHGEF1	NM_199002	coding	154	6	4	2	0.900862	0.115302	0.0926724	0.0226293
CBX1	NM_001127228	coding	54	1	1	0	1	0.129032	0.129032	0
NCOA4	NM_005437	coding	156	1	0	1	0.991328	0.0368564	0	0.0368564
STARD7	NM_020151	coding	38	2	2	0	0.92363	0.049416	0.049416	0
NT5E	NM_001204813	coding	450	9	9	0	1	0.411429	0.411429	0
BID	NM_001244569	coding	13	1	1	0	1	0.21	0.21	0
SDCBP	NM_005625	coding	90	1	1	0	1	0.0847269	0.0847269	0
ELAVL1	NM_001419	coding	65	5	5	0	0.974516	0.311927	0.311927	0
CXADR	NM_001207065	coding	8	0	0	0	1	0	0	0
MTRNR2L8	NM_001190702	coding	141	0	0	0	1	0	0	0
NUMB	NM_001005743	coding	61	15	15	0	0.906442	0.0383436	0.0383436	0
FAM20B	NM_014864	coding	93	0	0	0	0.909756	0	0	0
KRT7	NM_005556	coding	196	10	10	0	0.913475	0.408511	0.408511	0
PSMF1	NM_006814	coding	39	1	1	0	1	0.00245098	0.00245098	0
OCIAD1	NM_017830	coding	64	1	0	1	0.99458	0.149051	0	0.149051
TPM4	NM_003290	coding	502	27	13	14	1	0.943775	0.746988	0.568942
PTRH2	NM_016077	coding	34	0	0	0	0.994444	0	0	0
ATXN10	NM_013236	coding	125	0	0	0	1	0	0	0
TADA3	NM_006354	coding	203	3	2	1	1	0.314858	0.21555	0.0993072
COPZ1	NM_001271735	coding	62	0	0	0	1	0	0	0
COPZ1	NM_001271734	coding	61	0	0	0	1	0	0	0
COPZ1	NM_001271736	coding	62	0	0	0	0.924731	0	0	0
ATF3	NM_001030287	coding	15	0	0	0	0.950549	0	0	0
ITGA3	NM_005501	coding	795	14	12	2	0.989691	0.228679	0.21462	0.0231178
CCDC50	NM_174908	coding	146	0	0	0	0.983713	0	0	0
SSH1	NM_001161330	coding	141	2	2	0	0.962482	0.033189	0.033189	0
SUPT5H	NM_001130825	coding	151	5	5	0	0.935732	0.139914	0.139914	0
SUPT5H	NM_001130824	coding	152	5	5	0	0.935968	0.1394	0.1394	0
ATP5H	NM_001003785	coding	74	3	2	1	1	0.405797	0.357488	0.0483092
RAB12	NM_001025300	coding	44	0	0	0	0.917007	0	0	0
C22orf28	NM_014306	coding	90	0	0	0	1	0	0	0
GAS6	NM_001143945	coding	243	4	4	0	1	0.301314	0.301314	0
MAPKAP1	NM_024117	coding	125	0	0	0	0.986311	0	0	0
CARS	NM_139273	coding	230	3	2	1	1	0.100413	0.0651077	0.0353049
DUSP4	NM_001394	coding	190	1	1	0	1	0.0489451	0.0489451	0
GRPEL1	NM_025196	coding	45	0	0	0	0.990826	0	0	0
CD74	NM_004355	coding	39	10	10	0	1	0.414878	0.414878	0
ARPC5	NM_001270439	coding	105	4	4	0	1	0.378495	0.378495	0
BAK1	NM_001188	coding	66	0	0	0	1	0	0	0
RASA1	NM_002890	coding	171	5	5	0	0.918893	0.0785623	0.0785623	0
AZIN1	NM_015878	coding	122	0	0	0	0.996288	0	0	0
C11orf83	NM_001085372	coding	26	1	0	1	1	0.343972	0	0.343972
SF3A3	NM_006802	coding	73	1	0	1	0.948207	0.0325365	0	0.0325365
SLC39A9	NM_001252151	coding	39	0	0	0	1	0	0	0
SLC39A9	NM_001252152	coding	39	0	0	0	1	0	0	0
RPL37A	NM_000998	coding	186	23	15	8	1	1	1	0.795699
PNKD	NM_001077399	coding	19	0	0	0	0.932401	0	0	0
ECH1	NM_001398	coding	84	11	11	0	0.987842	0.608916	0.608916	0
BSCL2	NM_001122955	coding	65	1	1	0	0.935205	0.0791937	0.0791937	0
SLC29A1	NM_001078177	coding	92	2	2	0	0.982495	0.115244	0.115244	0
TOP2A	NM_001067	coding	414	1	1	0	0.999782	0.0169713	0.0169713	0
SCFD1	NM_001257376	coding	63	1	0	1	0.934664	0.0483969	0	0.0483969
FAM49B	NM_001256763	coding	60	0	0	0	1	0	0	0
HLA-E	NM_005516	coding	404	11	11	0	0.997214	0.505107	0.505107	0
PRDX6	NM_004905	coding	213	11	7	4	1	0.586667	0.380741	0.358519
PPP2R5C	NM_178587	coding	60	1	0	1	0.94963	0.0437037	0	0.0437037
UBE2C	NM_181801	coding	81	7	5	2	1	0.775414	0.775414	0.21513
RPL29	NM_000992	coding	541	38	32	6	1	1	1	0.460417
PDIA3	NM_005313	coding	98	6	5	1	0.969038	0.250988	0.245718	0.0408432
TSPAN17	NM_012171	coding	30	1	0	1	0.938939	0.105105	0	0.105105
SET	NM_001122821	coding	308	16	4	12	1	0.607102	0.328751	0.375716
RBPJ	NM_005349	coding	101	3	3	0	0.960745	0.0738523	0.0738523	0
FBXO28	NM_001136115	coding	25	0	0	0	0.961111	0	0	0
TXN	NM_003329	coding	211	5	4	1	1	0.779874	0.657233	0.232704
MRP63	NM_024026	coding	31	1	1	0	1	0.213592	0.213592	0
DAXX	NM_001350	coding	100	4	1	3	0.91543	0.150697	0.0454341	0.105263
LIMCH1	NM_001112719	coding	410	3	3	0	1	0.0885936	0.0885936	0
PTK7	NM_002821	coding	208	3	3	0	0.939932	0.0547775	0.0547775	0
EEF1G	NM_001404	coding	1699	86	43	43	1	0.958904	0.820396	0.764079
COPS6	NM_006833	coding	120	5	3	2	1	0.264228	0.215447	0.0487805
NANS	NM_018946	coding	74	2	2	0	1	0.178704	0.178704	0
ARFGAP1	NM_018209	coding	63	4	0	4	0.935299	0.109746	0	0.109746
MAP3K3	NM_002401	coding	44	0	0	0	0.923445	0	0	0
PTRF	NM_012232	coding	384	20	18	2	0.969309	0.574595	0.574595	0.0460358
AXL	NM_021913	coding	1935	14	14	0	1	0.36648	0.36648	0
CEBPG	NM_001252296	coding	24	2	2	0	1	0.328918	0.328918	0
KIAA0391	NM_001256680	coding	17	0	0	0	0.987421	0	0	0
KIAA0391	NM_001256681	coding	17	0	0	0	0.987421	0	0	0
EPRS	NM_004446	coding	200	2	2	0	0.972902	0.0475876	0.0475876	0
MGAT1	NM_001114619	coding	106	5	5	0	0.938714	0.238416	0.238416	0
MINA	NM_001042533	coding	52	0	0	0	0.922031	0	0	0
RRM1	NM_001033	coding	142	5	5	0	0.96343	0.135771	0.135771	0
C6orf106	NM_024294	coding	67	0	0	0	0.979933	0	0	0
ARFRP1	NM_001267548	coding	29	0	0	0	0.965347	0	0	0
ARFRP1	NM_001134758	coding	29	0	0	0	0.992337	0	0	0
HIST1H2BO	NM_003527	coding	81	4	4	0	1	0.469816	0.469816	0
BCCIP	NM_078469	coding	45	1	1	0	0.936291	0.143345	0.143345	0
CLTC	NM_004859	coding	473	10	10	0	0.993437	0.0793556	0.0793556	0
DYNLRB1	NM_014183	coding	46	5	3	2	1	0.223368	0.158076	0.120275
CD99L2	NM_134446	coding	37	0	0	0	0.990654	0	0	0
CD99L2	NM_134445	coding	31	0	0	0	0.989529	0	0	0
SCAMP3	NM_052837	coding	87	1	1	0	1	0.0745342	0.0745342	0
MAN2A1	NM_002372	coding	180	0	0	0	0.955167	0	0	0
CCS	NM_005125	coding	29	0	0	0	0.944242	0	0	0
SRPR	NM_003139	coding	122	2	2	0	0.985394	0.0693792	0.0693792	0
ARL1	NM_001177	coding	79	0	0	0	1	0	0	0
ERP29	NM_001034025	coding	43	0	0	0	1	0	0	0
GOLGA7	NM_016099	coding	18	0	0	0	1	0	0	0
WARS	NM_004184	coding	86	0	0	0	0.977401	0	0	0
MAPRE1	NM_012325	coding	108	2	1	1	1	0.283767	0.135068	0.148699
DNAJB1	NM_006145	coding	207	6	6	0	1	0.173998	0.173998	0
PSMB3	NM_002795	coding	166	1	1	0	1	0.0954693	0.0954693	0
TMEM189-UBE2V1	NM_199203	coding	45	1	1	0	0.922731	0.0682839	0.0682839	0
TSPAN17	NM_001006616	coding	26	1	0	1	0.955808	0.132576	0	0.132576
ATP5G2	NM_001002031	coding	58	1	1	0	0.964135	0.175105	0.175105	0
C19orf33	NM_033520	coding	99	3	3	0	1	0.392523	0.392523	0
PPARG	NM_005037	coding	74	0	0	0	0.999303	0	0	0
PMP22	NM_153322	coding	32	1	1	0	1	0.275362	0.275362	0
EEF2	NM_001961	coding	1495	59	40	19	1	0.818005	0.7435	0.269693
ZNF24	NM_006965	coding	77	0	0	0	0.999097	0	0	0
LAMB3	NM_001127641	coding	358	9	9	0	1	0.208014	0.208014	0
ZWINT	NM_001005413	coding	50	3	3	0	0.994228	0.467532	0.467532	0
EIF3F	NM_003754	coding	61	1	0	1	0.986034	0.0614525	0	0.0614525
CD55	NM_001114752	coding	278	7	7	0	1	0.312925	0.312925	0
PRPF8	NM_006445	coding	298	16	9	7	0.95762	0.112728	0.0612158	0.0515126
SPAG9	NM_003971	coding	156	6	3	3	0.961264	0.12105	0.0866463	0.0344037
MYO1B	NM_001161819	coding	132	1	1	0	0.915567	0.0301964	0.0301964	0
GADD45B	NM_015675	coding	69	1	1	0	1	0.0351967	0.0351967	0
SELK	NM_021237	coding	12	0	0	0	1	0	0	0
SLC43A3	NM_199329	coding	70	0	0	0	0.913279	0	0	0
IFRD1	NM_001197079	coding	67	0	0	0	0.961857	0	0	0
NXT1	NM_013248	coding	23	0	0	0	0.938534	0	0	0
TFRC	NM_001128148	coding	124	0	0	0	0.985983	0	0	0
CDC26	NM_139286	coding	14	0	0	0	1	0	0	0
UXT	NM_004182	coding	51	1	1	0	1	0.21097	0.21097	0
GOLPH3	NM_022130	coding	88	0	0	0	0.972129	0	0	0
LSS	NM_001145437	coding	93	7	7	0	0.953548	0.200613	0.200613	0
IER2	NM_004907	coding	48	4	1	3	0.940476	0.275298	0.0446429	0.230655
RNF4	NM_001185010	coding	24	0	0	0	0.979532	0	0	0
CERS2	NM_181746	coding	116	1	1	0	0.986877	0.129484	0.129484	0
TIAL1	NM_003252	coding	67	0	0	0	1	0	0	0
ABL2	NM_001136000	coding	256	2	2	0	0.992801	0.0510172	0.0510172	0
TCEB1	NM_001204859	coding	21	0	0	0	0.943953	0	0	0
TCEB1	NM_001204858	coding	21	0	0	0	0.943953	0	0	0
TCEB1	NM_001204857	coding	21	0	0	0	0.943953	0	0	0
PCYT2	NM_001256433	coding	52	1	1	0	0.968254	0.0952381	0.0952381	0
PCYT2	NM_001256434	coding	51	4	4	0	0.948424	0.202483	0.202483	0
PCYT2	NM_001256435	coding	49	4	4	0	1	0.178419	0.178419	0
MED17	NM_004268	coding	49	1	1	0	0.902863	0.0189162	0.0189162	0
RAD23A	NM_005053	coding	166	9	3	6	1	0.32326	0.14011	0.224359
WSB1	NM_015626	coding	24	0	0	0	0.911532	0	0	0
C15orf41	NM_001130010	coding	14	0	0	0	0.920804	0	0	0
TMED10	NM_006827	coding	99	2	1	1	1	0.34697	0.206061	0.140909
COPS8	NM_198189	coding	14	1	1	0	0.966874	0.244306	0.244306	0
CELF1	NM_001025596	coding	90	2	1	1	0.939083	0.0951403	0.0609172	0.0342231
DPP3	NM_130443	coding	81	2	2	0	0.901084	0.0727191	0.0727191	0
VEGFA	NM_001204384	coding	109	2	2	0	0.992248	0.0988372	0.0988372	0
WHSC1	NM_133330	coding	317	5	2	3	0.993655	0.0751586	0.0468521	0.0283065
WHSC1	NM_133331	coding	317	5	2	3	0.993655	0.0751586	0.0468521	0.0283065
HSPA8	NM_153201	coding	1800	24	19	5	1	0.719973	0.684211	0.109312
NARF	NM_001083608	coding	46	3	3	0	0.95436	0.0847596	0.0847596	0
ISCA2	NM_194279	coding	15	0	0	0	0.909677	0	0	0
RIC8A	NM_021932	coding	196	0	0	0	0.998761	0	0	0
TMEM216	NM_016499	coding	11	0	0	0	0.981061	0	0	0
SCRN1	NM_001145513	coding	158	3	3	0	0.999197	0.208835	0.208835	0
STK40	NM_032017	coding	57	4	4	0	0.969419	0.216361	0.216361	0
IFIT1	NM_001548	coding	31	0	0	0	0.963814	0	0	0
QSOX1	NM_002826	coding	405	8	6	2	0.994652	0.253565	0.216132	0.0374332
TIMM17B	NM_005834	coding	77	1	1	0	0.965318	0.0982659	0.0982659	0
HYI	NM_031207	coding	61	2	2	0	0.958333	0.0981183	0.0981183	0
RPL18	NM_001270490	coding	471	37	30	7	1	0.960417	0.960417	0.277083
RPL18	NM_000979	coding	478	38	31	7	1	0.96649	0.96649	0.335097
SEC23B	NM_006363	coding	158	1	1	0	0.983941	0.0460069	0.0460069	0
SPAG9	NM_001251971	coding	126	4	3	1	0.924165	0.116016	0.0962083	0.0198076
U2AF2	NM_001012478	coding	110	4	3	1	1	0.218927	0.150424	0.0685028
TIMM10	NM_012456	coding	14	0	0	0	1	0	0	0
CLCN3	NM_001829	coding	67	0	0	0	0.906797	0	0	0
SPTBN1	NM_178313	coding	266	26	17	9	0.91945	0.235003	0.174706	0.0802412
TPM3	NM_001043351	coding	241	13	9	4	1	0.566265	0.528782	0.170013
FTH1	NM_002032	coding	271	225	39	186	1	1	1	1
ACTG1	NM_001614	coding	567	56	48	8	1	0.998227	0.998227	0.312943
CTDSP1	NM_021198	coding	27	1	1	0	0.950382	0.0928753	0.0928753	0
GNAI2	NM_001166425	coding	366	9	7	2	0.992685	0.587252	0.467085	0.208986
FXR2	NM_004860	coding	102	5	4	1	0.948071	0.143422	0.0860534	0.0573689
IFRD1	NM_001197080	coding	67	0	0	0	0.961857	0	0	0
HNRNPAB	NM_031266	coding	87	4	1	3	0.960961	0.119119	0.03003	0.118118
VCP	NM_007126	coding	387	7	5	2	0.999587	0.261049	0.216439	0.0735233
PTGES	NM_004878	coding	50	5	1	4	1	0.688453	0.259259	0.429194
MTMR2	NM_001243571	coding	56	0	0	0	0.924825	0	0	0
ARHGDIA	NM_004309	coding	120	6	4	2	1	0.504065	0.466667	0.154472
PRPF40A	NM_017892	coding	134	0	0	0	0.976011	0	0	0
DCAKD	NM_024819	coding	20	0	0	0	0.936782	0	0	0
CITED2	NM_006079	coding	85	0	0	0	0.95572	0	0	0
DDX3X	NM_001193417	coding	143	2	0	2	0.985059	0.0613086	0	0.0613086
FAM220A	NM_001037163	coding	34	1	0	1	0.911538	0.105128	0	0.105128
LIMA1	NM_001113547	coding	201	5	5	0	0.992235	0.16528	0.16528	0
UTP23	NM_032334	coding	25	0	0	0	0.948	0	0	0
VPS72	NM_001271087	coding	78	4	0	4	0.974291	0.117908	0	0.117908
VPS72	NM_001271088	coding	57	1	0	1	1	0.108333	0	0.108333
STXBP2	NM_001127396	coding	183	2	1	1	0.994924	0.12634	0.0908065	0.035533
DCTN1	NM_001135041	coding	249	3	2	1	0.95848	0.072807	0.0517544	0.0210526
UBL5	NM_024292	coding	75	8	7	1	1	0.481982	0.481982	0.0900901
YPEL5	NM_001127399	coding	35	1	1	0	1	0.079235	0.079235	0
DEGS1	NM_003676	coding	56	1	1	0	1	0.152263	0.152263	0
PEX19	NM_001193644	coding	86	0	0	0	0.994048	0	0	0
SAA1	NM_001178006	coding	32	2	2	0	1	0.319783	0.319783	0
SRGAP2D	NM_001271887	coding	56	1	1	0	0.948802	0.0588235	0.0588235	0
NEDD4L	NM_001144970	coding	110	1	1	0	0.927345	0.0139721	0.0139721	0
RPSA	NM_001012321	coding	769	55	22	33	1	0.890766	0.697072	0.649775
HSD17B4	NM_001199292	coding	70	0	0	0	0.956421	0	0	0
ATP5G3	NM_001689	coding	116	8	4	4	1	0.818182	0.496503	0.452214
GOLGA5	NM_005113	coding	103	8	7	1	0.946721	0.0819672	0.0523679	0.0295993
PLEKHB2	NM_001100623	coding	50	1	0	1	1	0.0911809	0	0.0911809
EHF	NM_001206615	coding	68	0	0	0	0.986811	0	0	0
PMM1	NM_002676	coding	84	0	0	0	0.963245	0	0	0
ATP5C1	NM_005174	coding	177	7	5	2	1	0.286353	0.285235	0.100671
CFB	NM_001710	coding	284	5	2	3	1	0.139869	0.0915033	0.0749455
UBE2A	NM_181777	coding	43	1	0	1	1	0.290598	0	0.290598
MCL1	NM_001197320	coding	197	2	1	1	1	0.161616	0.020202	0.141414
SNRPE	NM_003094	coding	37	0	0	0	1	0	0	0
EXOSC5	NM_020158	coding	73	0	0	0	1	0	0	0
AK2	NM_001199199	coding	115	1	0	1	1	0.0948148	0	0.0948148
TNNT1	NM_001126132	coding	104	6	4	2	0.941698	0.34474	0.296578	0.0975919
TNNT1	NM_001126133	coding	104	6	4	2	0.939153	0.349206	0.309524	0.0912698
FBXW11	NM_033644	coding	85	1	0	1	0.901887	0.0861635	0	0.0861635
PIP5K1A	NM_001135636	coding	58	2	1	1	0.954748	0.0898662	0.0497132	0.040153
PIP5K1A	NM_001135637	coding	58	2	1	1	0.926813	0.0938124	0.0518962	0.0419162
CCT4	NM_006430	coding	309	5	3	2	1	0.159877	0.118519	0.05
RNF41	NM_194358	coding	39	1	1	0	1	0.0188934	0.0188934	0
SDHB	NM_003000	coding	79	5	3	2	0.903915	0.275208	0.124555	0.208778
GAS6	NM_001143946	coding	232	4	4	0	1	0.32193	0.32193	0
AK4	NM_001005353	coding	21	1	1	0	0.925595	0.19494	0.19494	0
DBI	NM_001079863	coding	112	5	3	2	0.955056	0.670412	0.670412	0.243446
NAA15	NM_057175	coding	80	1	1	0	0.910035	0.0407536	0.0407536	0
TOP1MT	NM_001258447	coding	48	2	2	0	0.902116	0.109127	0.109127	0
DENR	NM_003677	coding	35	1	1	0	0.963149	0.0268007	0.0268007	0
CSE1L	NM_001256135	coding	235	2	1	1	1	0.0676856	0.0305677	0.0374818
TM9SF3	NM_020123	coding	119	0	0	0	0.977966	0	0	0
PGM3	NM_015599	coding	108	0	0	0	1	0	0	0
PDRG1	NM_030815	coding	15	3	2	1	1	0.149254	0.0124378	0.136816
KARS	NM_001130089	coding	134	18	17	1	0.974441	0.234292	0.230564	0.0457934
CD40	NM_152854	coding	36	4	4	0	0.94281	0.133987	0.133987	0
STK25	NM_006374	coding	93	3	1	2	0.980484	0.069477	0.0296643	0.0398126
XRCC6	NM_001469	coding	142	4	3	1	0.998907	0.226776	0.187978	0.0387978
SRP9	NM_003133	coding	61	5	2	3	1	0.509579	0.452107	0.0574713
PPARG	NM_138712	coding	74	0	0	0	0.999303	0	0	0
PSMA2	NM_002787	coding	89	4	2	2	1	0.419858	0.168794	0.251064
ENTPD6	NM_001247	coding	65	0	0	0	0.914089	0	0	0
EIF2D	NM_006893	coding	104	2	1	1	0.990883	0.0518519	0.0296296	0.0467236
ADK	NM_006721	coding	71	1	1	0	0.940312	0.0642792	0.0642792	0
TCEB1	NM_001204861	coding	21	0	0	0	0.943953	0	0	0
AP2B1	NM_001030006	coding	458	7	7	0	1	0.139706	0.139706	0
SERF2	NM_001199878	coding	93	8	5	3	1	1	0.992754	0.673913
YPEL5	NM_001127400	coding	35	1	1	0	1	0.079235	0.079235	0
YPEL5	NM_001127401	coding	35	1	1	0	1	0.079235	0.079235	0
RPL8	NM_033301	coding	876	100	57	43	1	1	0.965116	0.848837
GLRX2	NM_001243399	coding	4	0	0	0	0.976	0	0	0
RAI14	NM_001145523	coding	123	9	3	6	0.963001	0.219596	0.0866735	0.193559
IL6ST	NM_001190981	coding	205	2107	2107	0	0.998446	0.0229215	0.0229215	0
MAPKAP1	NM_001006620	coding	103	0	0	0	0.97281	0	0	0
MAPKAP1	NM_001006621	coding	103	0	0	0	0.97281	0	0	0
TIAL1	NM_001033925	coding	67	0	0	0	1	0	0	0
MGAT1	NM_001114617	coding	106	5	5	0	0.938714	0.238416	0.238416	0
SEC13	NM_001136232	coding	196	20	11	9	1	0.692557	0.607335	0.12082
CDKN2C	NM_078626	coding	10	0	0	0	0.966469	0	0	0
HM13	NM_030789	coding	73	2	2	0	1	0.0793651	0.0793651	0
SUPT5H	NM_001111020	coding	152	5	5	0	0.935968	0.1394	0.1394	0
PDP1	NM_001161780	coding	206	3	2	1	0.985198	0.149201	0.120189	0.0290112
PDE6D	NM_002601	coding	10	0	0	0	0.997792	0	0	0
TRIP12	NM_004238	coding	324	3	3	0	0.969895	0.0264258	0.0264258	0
ACBD5	NM_001042473	coding	48	0	0	0	0.955872	0	0	0
CD151	NM_004357	coding	317	15	14	1	1	0.52231	0.447507	0.0748031
XPO1	NM_003400	coding	214	0	0	0	0.994714	0	0	0
HMGCS1	NM_001098272	coding	99	0	0	0	0.997441	0	0	0
CCDC130	NM_030818	coding	37	0	0	0	0.945424	0	0	0
HSPB11	NM_016126	coding	11	0	0	0	0.924138	0	0	0
MAPKAPK3	NM_004635	coding	54	2	0	2	0.962576	0.024369	0	0.024369
TKT	NM_001064	coding	301	16	10	6	1	0.480769	0.362714	0.133547
MAP7D3	NM_001173517	coding	160	3	3	0	0.935867	0.110847	0.110847	0
MAX	NM_145112	coding	25	1	1	0	1	0.111842	0.111842	0
TNPO2	NM_001136196	coding	198	1	1	0	0.968448	0.0233853	0.0233853	0
CTDSP1	NM_182642	coding	27	1	1	0	0.954023	0.0932312	0.0932312	0
HNRNPA2B1	NM_031243	coding	371	23	13	10	1	0.527307	0.357815	0.338041
EXOSC9	NM_005033	coding	55	1	1	0	0.956061	0.0575758	0.0575758	0
HMGB2	NM_001130689	coding	233	4	4	0	1	0.571429	0.571429	0
SNUPN	NM_001042581	coding	44	0	0	0	0.973223	0	0	0
OLA1	NM_001011708	coding	55	0	0	0	0.960948	0	0	0
HIST1H2BB	NM_021062	coding	150	1	1	0	1	0.254593	0.254593	0
RNF4	NM_001185009	coding	31	0	0	0	0.958115	0	0	0
FDPS	NM_002004	coding	134	3	0	3	0.924603	0.185714	0	0.185714
CDCA5	NM_080668	coding	26	1	1	0	0.924901	0.0961792	0.0961792	0
RNF41	NM_001242826	coding	41	1	1	0	0.922432	0.0555556	0.0555556	0
RHOA	NM_001664	coding	301	11	10	1	1	0.676976	0.675258	0.185567
WDR45B	NM_019613	coding	89	2	2	0	1	0.0560386	0.0560386	0
ASPH	NM_001164751	coding	77	3	1	2	0.921962	0.150502	0.118172	0.03233
ASPH	NM_001164752	coding	77	3	1	2	0.916667	0.160714	0.12619	0.0345238
ASPH	NM_001164753	coding	71	3	1	2	0.909209	0.175097	0.137484	0.0376135
THOC6	NM_001142350	coding	70	2	0	2	0.940516	0.043771	0	0.043771
BCAP31	NM_005745	coding	98	2	1	1	1	0.153846	0.0728745	0.0809717
SIL1	NM_022464	coding	95	3	3	0	0.948773	0.0995671	0.0995671	0
ATP5E	NM_006886	coding	88	4	3	1	1	0.705128	0.391026	0.378205
DDX56	NM_019082	coding	94	5	3	2	0.975061	0.218978	0.15146	0.0675182
NFKBIZ	NM_001005474	coding	122	1	1	0	1	0.0705439	0.0705439	0
FAM104B	NM_001166703	coding	8	0	0	0	0.910145	0	0	0
HSPA13	NM_006948	coding	86	1	0	1	0.980932	0.0388418	0	0.0388418
CDK2AP1	NM_001270434	coding	19	4	2	2	1	0.719697	0.378788	0.67803
PTPRM	NM_001105244	coding	281	0	0	0	0.977035	0	0	0
AHSA1	NM_012111	coding	125	3	3	0	0.999017	0.19764	0.19764	0
CEP55	NM_018131	coding	61	0	0	0	0.928315	0	0	0
NDUFB7	NM_004146	coding	107	2	1	1	1	0.528986	0.323671	0.205314
NAPA	NM_003827	coding	49	3	0	3	0.942568	0.105856	0	0.105856
MARCH2	NM_001005416	coding	49	1	1	0	0.913371	0.124294	0.124294	0
MARCH2	NM_001005415	coding	55	1	1	0	0.937922	0.0890688	0.0890688	0
NDUFB11	NM_001135998	coding	50	3	3	0	1	0.638528	0.638528	0
DLAT	NM_001931	coding	82	0	0	0	0.94393	0	0	0
EHD1	NM_006795	coding	93	8	5	3	0.976947	0.305919	0.196262	0.115265
FUT8	NM_178156	coding	79	0	0	0	0.965278	0	0	0
FUT8	NM_178155	coding	79	0	0	0	0.965278	0	0	0
MYL9	NM_181526	coding	38	3	2	1	1	0.204482	0.070028	0.134454
WWC1	NM_001161662	coding	120	3	3	0	0.923444	0.0786416	0.0786416	0
HNRNPF	NM_004966	coding	380	11	7	4	1	0.479167	0.448718	0.155449
RPRD1A	NM_018170	coding	41	0	0	0	0.938232	0	0	0
NOP10	NM_018648	coding	35	5	0	5	1	0.74359	0	0.74359
EIF2D	NM_001201478	coding	79	2	1	1	0.989154	0.065799	0.0375994	0.0592914
MED8	NM_201542	coding	18	0	0	0	0.915737	0	0	0
CHIC2	NM_012110	coding	13	0	0	0	0.943775	0	0	0
HIST1H4C	NM_003542	coding	326	3	3	0	1	0.679487	0.679487	0
BRMS1	NM_001024957	coding	78	0	0	0	0.953036	0	0	0
CAPN1	NM_001198868	coding	157	8	8	0	0.984615	0.277389	0.277389	0
DIABLO	NM_138929	coding	45	1	1	0	1	0.0170068	0.0170068	0
FBXO18	NM_001258452	coding	144	1	0	1	0.975346	0.0273556	0	0.0273556
NOP56	NM_006392	coding	156	4	1	3	1	0.127171	0.0201681	0.127171
CDCA4	NM_145701	coding	43	1	1	0	0.987603	0.133609	0.133609	0
CHID1	NM_023947	coding	63	0	0	0	0.98731	0	0	0
HAUS4	NM_017815	coding	65	11	8	3	0.956044	0.250916	0.113553	0.137363
CAPG	NM_001747	coding	402	17	17	0	1	0.765043	0.765043	0
GTF2B	NM_001514	coding	37	0	0	0	0.963197	0	0	0
PIN1	NM_006221	coding	45	2	1	1	1	0.412602	0.207317	0.205285
TAP2	NM_000544	coding	156	3	3	0	0.988163	0.140152	0.140152	0
ATP2C1	NM_001199179	coding	91	0	0	0	0.927899	0	0	0
TAPBP	NM_172209	coding	45	2	2	0	0.90884	0.131676	0.131676	0
FSTL1	NM_007085	coding	177	4	2	2	1	0.244876	0.202805	0.0420712
TCEA2	NM_003195	coding	60	0	0	0	0.961111	0	0	0
ANAPC11	NM_001002249	coding	53	2	2	0	1	0.670588	0.670588	0
CDV3	NM_001134423	coding	27	0	0	0	1	0	0	0
SRSF1	NM_001078166	coding	51	0	0	0	0.945545	0	0	0
LAYN	NM_001258391	coding	74	1	1	0	1	0.17971	0.17971	0
ACTL6A	NM_177989	coding	64	1	1	0	0.985395	0.0146048	0.0146048	0
MORF4L2	NM_001142429	coding	348	9	7	2	1	0.514418	0.412918	0.129181
MORF4L2	NM_001142423	coding	348	9	7	2	1	0.514418	0.412918	0.129181
MORF4L2	NM_001142424	coding	348	9	7	2	1	0.514418	0.412918	0.129181
MORF4L2	NM_001142426	coding	348	9	7	2	1	0.514418	0.412918	0.129181
CUL7	NM_014780	coding	391	367	367	0	0.972729	0.0706298	0.0706298	0
SYNJ2BP-COX16	NM_001202547	coding	22	2	2	0	0.960069	0.298611	0.298611	0
AAR2	NM_001271874	coding	102	3	2	1	1	0.15671	0.0675325	0.0891775
CNBP	NM_001127193	coding	158	4	4	0	1	0.342644	0.342644	0
CNBP	NM_001127195	coding	158	4	4	0	1	0.315891	0.315891	0
CNBP	NM_001127196	coding	158	4	4	0	1	0.317739	0.317739	0
ROMO1	NM_080748	coding	65	4	4	0	1	0.7625	0.7625	0
PLXNA1	NM_032242	coding	242	4	4	0	0.929889	0.0449833	0.0449833	0
CHMP2A	NM_198426	coding	92	2	1	1	0.986547	0.197309	0.112108	0.0852018
CMSS1	NM_032359	coding	26	2	2	0	0.957143	0.107143	0.107143	0
EDF1	NM_153200	coding	62	3	2	1	0.959524	0.538095	0.42381	0.114286
AK3	NM_001199856	coding	18	1	1	0	0.934599	0.172996	0.172996	0
RNH1	NM_203389	coding	262	8	8	0	1	0.449495	0.449495	0
STAG2	NM_001042751	coding	162	2	2	0	0.959416	0.0660173	0.0660173	0
GPBP1L1	NM_021639	coding	95	0	0	0	0.976842	0	0	0
C5orf15	NM_020199	coding	60	1	1	0	0.93609	0.155388	0.155388	0
STK38	NM_007271	coding	59	0	0	0	0.959227	0	0	0
GNAS	NM_080426	coding	685	40	30	10	1	0.868766	0.812773	0.467192
DDOST	NM_005216	coding	272	5	3	2	1	0.253829	0.237053	0.0430343
FUT8	NM_004480	coding	64	0	0	0	0.979822	0	0	0
MCM3	NM_002388	coding	169	1	0	1	0.961749	0.0101483	0	0.0101483
OAZ2	NM_002537	coding	47	1	0	1	1	0.183888	0	0.183888
CKB	NM_001823	coding	81	2	2	0	0.910995	0.15096	0.15096	0
RPUSD4	NM_032795	coding	34	1	1	0	0.907407	0.0238095	0.0238095	0
C9orf78	NM_016520	coding	48	2	2	0	1	0.166667	0.166667	0
IMMT	NM_006839	coding	119	4	3	1	0.966184	0.153711	0.102328	0.0513834
PUF60	NM_001271099	coding	110	22	12	10	0.94162	0.501569	0.281858	0.302574
PRMT2	NM_001242864	coding	45	2	2	0	0.941767	0.149598	0.149598	0
PUF60	NM_001271096	coding	111	22	12	10	0.926199	0.46556	0.276138	0.270603
PMF1-BGLAP	NM_001199661	coding	45	1	1	0	0.930618	0.122172	0.122172	0
PMF1-BGLAP	NM_001199662	coding	45	1	1	0	0.993711	0.163522	0.163522	0
PMF1-BGLAP	NM_001199664	coding	40	1	1	0	0.990676	0.0536131	0.0536131	0
MKNK2	NM_199054	coding	65	8	8	0	0.962804	0.365522	0.365522	0
GADD45A	NM_001199741	coding	26	0	0	0	0.989899	0	0	0
FTSJ1	NM_177434	coding	70	3	3	0	0.971545	0.10874	0.10874	0
GADD45A	NM_001199742	coding	22	0	0	0	0.978142	0	0	0
HNRNPC	NM_001077443	coding	635	8	4	4	1	0.404762	0.269841	0.252834
HNRNPC	NM_001077442	coding	635	8	4	4	1	0.387622	0.258415	0.242128
UBE2L3	NM_001256356	coding	41	3	3	0	1	0.355014	0.355014	0
RBM39	NM_004902	coding	96	3	2	1	0.974603	0.133333	0.0888889	0.0444444
CCT2	NM_001198842	coding	197	5	1	4	1	0.130879	0.0279482	0.102931
TNIP1	NM_001258454	coding	255	15	8	7	0.980115	0.406593	0.250131	0.161172
HDLBP	NM_005336	coding	522	29	20	9	1	0.432887	0.344891	0.140531
SPG21	NM_016630	coding	34	0	0	0	0.902913	0	0	0
OPA1	NM_015560	coding	154	1	1	0	0.95803	0.0110995	0.0110995	0
CSDE1	NM_001242891	coding	445	5	4	1	0.945562	0.216963	0.203156	0.0138067
CSDE1	NM_001242893	coding	445	5	4	1	1	0.238715	0.223524	0.015191
CSDE1	NM_001242892	coding	445	5	4	1	1	0.229453	0.214852	0.0146016
MRPL3	NM_007208	coding	59	3	0	3	1	0.103152	0	0.103152
MCM3	NM_001270472	coding	166	1	0	1	0.956858	0.010582	0	0.010582
PDCD4	NM_001199492	coding	38	1	1	0	0.945906	0.0460526	0.0460526	0
FGFR1	NM_023106	coding	144	8	6	2	1	0.190346	0.135701	0.0546448
SDHD	NM_001276504	coding	44	3	3	0	1	0.473829	0.473829	0
CALD1	NM_004342	coding	111	5	3	2	0.991342	0.158936	0.153989	0.0371058
SDHD	NM_001276503	coding	33	3	3	0	1	0.158915	0.158915	0
GMPR2	NM_016576	coding	66	0	0	0	0.982743	0	0	0
RPS24	NM_001142282	coding	525	42	26	16	1	0.957071	0.957071	0.810606
GPN1	NM_001145048	coding	36	2	2	0	0.90991	0.262387	0.262387	0
GPN1	NM_001145049	coding	38	2	2	0	0.966667	0.277381	0.277381	0
TRAPPC4	NM_016146	coding	88	2	1	1	1	0.2	0.0681818	0.131818
U2AF1	NM_006758	coding	37	3	1	2	0.901798	0.284924	0.0733057	0.26971
NR3C1	NM_001018077	coding	147	2	2	0	0.989717	0.0732648	0.0732648	0
NR3C1	NM_001018074	coding	147	2	2	0	0.989717	0.0732648	0.0732648	0
NR3C1	NM_001018075	coding	147	2	2	0	0.989717	0.0732648	0.0732648	0
YWHAZ	NM_001135702	coding	217	2	2	0	1	0.224932	0.224932	0
PFDN6	NM_001265595	coding	34	1	1	0	1	0.115385	0.115385	0
PFDN6	NM_001265596	coding	34	1	1	0	1	0.115385	0.115385	0
RPS27A	NM_001177413	coding	451	18	7	11	1	0.912951	0.834395	0.679406
GTF3C5	NM_001122823	coding	66	2	1	1	0.912081	0.0790639	0.0759013	0.00316256
PDCD6IP	NM_013374	coding	169	3	1	2	0.972382	0.0675105	0.0233985	0.044112
GNL3L	NM_001184819	coding	67	0	0	0	0.963979	0	0	0
S100A4	NM_002961	coding	98	5	5	0	1	0.732026	0.732026	0
NR3C1	NM_001204265	coding	131	2	2	0	0.986706	0.084195	0.084195	0
SPRED1	NM_152594	coding	41	0	0	0	0.907865	0	0	0
C4orf3	NM_001001701	coding	13	0	0	0	1	0	0	0
TUBA1A	NM_001270399	coding	177	0	0	0	0.95059	0	0	0
APMAP	NM_020531	coding	82	2	2	0	0.966427	0.128697	0.128697	0
HNRNPC	NM_031314	coding	635	8	4	4	1	0.387622	0.258415	0.242128
NUMB	NM_001005745	coding	57	2	2	0	0.915683	0.0241709	0.0241709	0
TUBB6	NM_032525	coding	370	6	6	0	1	0.315436	0.315436	0
ACTG1	NM_001199954	coding	567	56	48	8	1	0.998227	0.998227	0.312943
KARS	NM_005548	coding	142	18	17	1	0.973244	0.196767	0.192865	0.0479376
SARS	NM_006513	coding	219	7	7	0	0.998058	0.295793	0.295793	0
VPS29	NM_016226	coding	54	2	2	0	1	0.326047	0.326047	0
PSMD7	NM_002811	coding	80	1	1	0	0.992821	0.113846	0.113846	0
NARR	NM_001256281	coding	55	3	3	0	0.922948	0.204355	0.204355	0
UBE2I	NM_003345	coding	51	1	1	0	1	0.327044	0.327044	0
MAPKAPK2	NM_032960	coding	94	5	5	0	0.965919	0.236908	0.236908	0
AKT1	NM_005163	coding	192	6	3	3	1	0.227997	0.167706	0.0741511
FST	NM_013409	coding	83	0	0	0	0.98744	0	0	0
SNUPN	NM_005701	coding	44	0	0	0	0.973223	0	0	0
NEDD4L	NM_015277	coding	125	1	1	0	0.924338	0.0122036	0.0122036	0
FAM134C	NM_178126	coding	46	0	0	0	0.962884	0	0	0
GLOD4	NM_016080	coding	26	2	1	1	0.947603	0.124861	0.100334	0.0345596
ATP6V1B2	NM_001693	coding	57	0	0	0	0.962891	0	0	0
GNG12	NM_018841	coding	53	0	0	0	1	0	0	0
CLIC1	NM_001288	coding	1321	28	27	1	1	0.827824	0.827824	0.0867769
CAND1	NM_018448	coding	131	20	19	1	0.916057	0.0695911	0.0238289	0.0457623
C17orf62	NM_001193653	coding	13	0	0	0	0.932624	0	0	0
C17orf62	NM_001193654	coding	13	0	0	0	0.932624	0	0	0
C17orf62	NM_001193657	coding	13	0	0	0	0.932624	0	0	0
TRAPPC1	NM_021210	coding	25	2	2	0	1	0.321918	0.321918	0
SCAMP3	NM_005698	coding	88	1	1	0	1	0.0689655	0.0689655	0
TKT	NM_001135055	coding	301	16	10	6	1	0.480769	0.362714	0.133547
PDXK	NM_003681	coding	108	3	3	0	1	0.220447	0.220447	0
PPP2R1A	NM_014225	coding	276	14	9	5	0.99548	0.456497	0.331638	0.197175
URM1	NM_030914	coding	18	0	0	0	0.928105	0	0	0
CCT3	NM_005998	coding	515	19	12	7	1	0.469475	0.350427	0.211233
FAM49B	NM_016623	coding	60	0	0	0	1	0	0	0
SRPK1	NM_003137	coding	491	6	6	0	1	0.239329	0.239329	0
ARHGAP5	NM_001030055	coding	168	1	0	1	0.952539	0.00953648	0	0.00953648
CARS	NM_001194997	coding	232	3	2	1	0.993416	0.0901235	0.0584362	0.0316872
FBXO32	NM_001242463	coding	32	0	0	0	0.975919	0	0	0
ACTL6A	NM_178042	coding	64	1	1	0	0.985395	0.0146048	0.0146048	0
CCNB1	NM_031966	coding	183	2	2	0	1	0.15745	0.15745	0
MLPH	NM_001042467	coding	117	2	2	0	0.980803	0.129145	0.129145	0
TRIM28	NM_005762	coding	574	7	6	1	0.948565	0.218102	0.181021	0.0370813
NDUFV1	NM_001166102	coding	91	4	3	1	1	0.229532	0.229532	0.0372807
SEC61G	NM_014302	coding	32	4	2	2	1	0.782609	0.396135	0.7343
UBE2V1	NM_001257395	coding	27	1	1	0	1	0.204598	0.204598	0
UBE2V1	NM_001257397	coding	21	0	0	0	1	0	0	0
UBE2V1	NM_001257396	coding	27	1	1	0	1	0.308176	0.308176	0
UBE2V1	NM_001257399	coding	21	0	0	0	1	0	0	0
UBE2V1	NM_001257398	coding	21	0	0	0	1	0	0	0
SAP30BP	NM_013260	coding	43	1	1	0	0.960086	0.147789	0.147789	0
SP100	NM_001206703	coding	78	0	0	0	0.995585	0	0	0
PHC2	NM_004427	coding	133	1	1	0	1	0.145062	0.145062	0
PQBP1	NM_001167989	coding	33	1	1	0	0.949686	0.148428	0.148428	0
CLDND1	NM_001040183	coding	144	2	2	0	1	0.11811	0.11811	0
COMMD9	NM_001101653	coding	22	1	1	0	0.936306	0.250531	0.250531	0
CLDND1	NM_001040181	coding	144	2	2	0	1	0.11811	0.11811	0
SNRNP35	NM_180699	coding	24	1	1	0	0.935185	0.247354	0.247354	0
GLTP	NM_016433	coding	129	0	0	0	1	0	0	0
NDUFA11	NM_175614	coding	77	4	4	0	1	0.697183	0.697183	0
RAB5B	NM_001252036	coding	72	1	1	0	1	0.0833333	0.0833333	0
ARIH2	NM_006321	coding	58	0	0	0	0.959514	0	0	0
SNX6	NM_021249	coding	54	1	0	1	0.994273	0.116838	0	0.116838
PDHA1	NM_000284	coding	75	5	5	0	1	0.15601	0.15601	0
PICALM	NM_001008660	coding	230	1	0	1	1	0.0310966	0	0.0310966
NARF	NM_001038618	coding	44	3	3	0	0.932998	0.0871022	0.0871022	0
GRAMD3	NM_023927	coding	47	0	0	0	0.965358	0	0	0
RPL28	NM_000991	coding	549	46	39	7	1	0.92029	0.92029	0.601449
NPLOC4	NM_017921	coding	80	1	0	1	0.950192	0.0738916	0	0.0738916
TSNAX	NM_005999	coding	23	0	0	0	0.970218	0	0	0
PFDN2	NM_012394	coding	73	7	3	4	1	0.698925	0.260215	0.490323
ARHGAP5	NM_001173	coding	168	1	0	1	0.953174	0.00954283	0	0.00954283
CCNL1	NM_020307	coding	99	1	1	0	0.955092	0.0430108	0.0430108	0
DCAF7	NM_005828	coding	45	1	0	1	0.960155	0.0369291	0	0.0369291
HDAC2	NM_001527	coding	98	0	0	0	0.996592	0	0	0
BABAM1	NM_014173	coding	162	6	6	0	0.99899	0.374747	0.374747	0
STRAP	NM_007178	coding	73	2	2	0	0.975309	0.155745	0.155745	0
ANXA5	NM_001154	coding	308	13	11	2	1	0.753894	0.69055	0.0924195
COX16	NM_016468	coding	23	0	0	0	0.931464	0	0	0
RPL7	NM_000971	coding	479	26	14	12	1	0.72423	0.72423	0.580991
NREP	NM_004772	coding	16	0	0	0	1	0	0	0
KDSR	NM_002035	coding	29	0	0	0	0.938939	0	0	0
C21orf33	NM_004649	coding	73	0	0	0	0.92689	0	0	0
AMZ2	NM_001033569	coding	54	0	0	0	0.978763	0	0	0
ETFA	NM_001127716	coding	71	2	1	1	1	0.127485	0.127485	0.105263
DAP3	NM_033657	coding	119	8	7	1	1	0.252297	0.216374	0.0359231
PSMD10	NM_002814	coding	29	1	1	0	0.969163	0.0396476	0.0396476	0
AKAP2	NM_001198656	coding	202	7	3	4	0.903326	0.120929	0.0654886	0.0554401
CLPP	NM_006012	coding	86	2	2	0	0.942446	0.2506	0.2506	0
NCSTN	NM_015331	coding	107	3	3	0	0.973709	0.0694836	0.0694836	0
SPRY4	NM_001127496	coding	41	0	0	0	0.963333	0	0	0
HNRNPF	NM_001098208	coding	380	11	7	4	1	0.479167	0.448718	0.155449
DLD	NM_000108	coding	61	3	3	0	0.947059	0.0849673	0.0849673	0
COA1	NM_018224	coding	8	0	0	0	0.963719	0	0	0
NBL1	NM_001204084	coding	26	0	0	0	0.917582	0	0	0
PICALM	NM_007166	coding	231	1	0	1	0.98877	0.0290965	0	0.0290965
NUSAP1	NM_018454	coding	77	4	1	3	0.976568	0.145125	0.0929705	0.0536659
ATF6B	NM_001136153	coding	79	4	4	0	0.92582	0.0874941	0.0874941	0
CST7	NM_003650	coding	11	0	0	0	0.995434	0	0	0
ABR	NM_001159746	coding	106	2	2	0	0.916871	0.0712531	0.0712531	0
ERBB2IP	NM_001006600	coding	510	4	3	1	0.992837	0.0542338	0.0478383	0.0063955
MRPL52	NM_180982	coding	39	1	1	0	1	0.430894	0.430894	0
EPN2	NM_148921	coding	54	1	1	0	0.931624	0.0638177	0.0638177	0
PPT1	NM_001142604	coding	17	0	0	0	0.910131	0	0	0
JOSD1	NM_014876	coding	36	0	0	0	1	0	0	0
EDEM1	NM_014674	coding	125	1	1	0	0.906788	0.029382	0.029382	0
ATP6AP1	NM_001183	coding	85	0	0	0	0.938429	0	0	0
NPC2	NM_006432	coding	75	2	1	1	1	0.157895	0.0657895	0.0921053
AKR1A1	NM_153326	coding	63	1	1	0	0.98364	0.0480573	0.0480573	0
BBX	NM_001142568	coding	171	4	4	0	0.953999	0.101557	0.101557	0
MFI2	NM_033316	coding	45	0	0	0	0.9978	0	0	0
CERS2	NM_022075	coding	116	1	1	0	0.986877	0.129484	0.129484	0
YIF1B	NM_033557	coding	37	1	1	0	1	0.105634	0.105634	0
CHRAC1	NM_017444	coding	12	2	1	1	0.919192	0.267677	0.194444	0.0732323
SRP68	NM_001260502	coding	66	1	1	0	0.943503	0.0502825	0.0502825	0
ENC1	NM_003633	coding	109	1	1	0	0.982486	0.116949	0.116949	0
CUTA	NM_001014840	coding	59	5	5	0	1	0.607407	0.607407	0
TMEM214	NM_001083590	coding	101	5	3	2	0.925581	0.194832	0.177778	0.0170543
MATR3	NM_018834	coding	208	9	6	3	0.997248	0.208726	0.168632	0.091195
BAG2	NM_004282	coding	40	0	0	0	1	0	0	0
TCEAL4	NM_001006935	coding	24	2	1	1	0.916667	0.368827	0.316358	0.0524691
TCEAL4	NM_001006937	coding	24	2	1	1	0.916667	0.368827	0.316358	0.0524691
SUGP2	NM_014884	coding	136	0	0	0	0.930132	0	0	0
DAXX	NM_001141970	coding	105	5	1	4	0.916777	0.171757	0.04471	0.127047
CALU	NM_001199671	coding	208	4	3	1	0.986626	0.20679	0.143004	0.122428
SMDT1	NM_033318	coding	8	0	0	0	0.972222	0	0	0
LPAR1	NM_001401	coding	99	1	0	1	1	0.0648402	0	0.0648402
FGFR1	NM_001174065	coding	152	8	6	2	1	0.169712	0.120991	0.0487211
AKT1	NM_001014431	coding	192	6	3	3	1	0.227997	0.167706	0.0741511
ERGIC1	NM_001031711	coding	51	3	3	0	0.970218	0.36197	0.36197	0
AURKAIP1	NM_017900	coding	65	8	4	4	0.985	0.218333	0.07	0.218333
LARP7	NM_016648	coding	61	0	0	0	0.970269	0	0	0
ZFAND6	NM_001242916	coding	24	0	0	0	1	0	0	0
ZFAND6	NM_001242915	coding	24	0	0	0	1	0	0	0
EI24	NM_004879	coding	73	1	0	1	0.935421	0.0547945	0	0.0547945
PSMB6	NM_002798	coding	153	4	4	0	1	0.348611	0.348611	0
PRPF4B	NM_003913	coding	220	0	0	0	0.974537	0	0	0
PPT1	NM_000310	coding	22	1	1	0	0.917481	0.0228013	0.0228013	0
USMG5	NM_001206427	coding	34	0	0	0	1	0	0	0
USMG5	NM_001206426	coding	34	0	0	0	1	0	0	0
AURKAIP1	NM_001127229	coding	65	8	4	4	0.985	0.218333	0.07	0.218333
RBPJ	NM_203283	coding	101	3	3	0	0.990398	0.0761317	0.0761317	0
LIF	NM_001257135	coding	17	0	0	0	1	0	0	0
MCRS1	NM_006337	coding	78	1	1	0	0.971922	0.0446364	0.0446364	0
SLC39A7	NM_001077516	coding	205	6	6	0	1	0.280142	0.280142	0
GHITM	NM_014394	coding	170	6	1	5	1	0.299615	0.0934489	0.206166
IFI27L1	NM_206949	coding	27	0	0	0	1	0	0	0
VEZF1	NM_007146	coding	57	0	0	0	0.989783	0	0	0
SERINC3	NM_198941	coding	178	7	7	0	1	0.277778	0.277778	0
H2AFY	NM_004893	coding	162	6	5	1	1	0.407706	0.371864	0.0358423
MRPL52	NM_181307	coding	38	1	1	0	1	0.356061	0.356061	0
CSE1L	NM_001316	coding	243	4	3	1	1	0.0871056	0.0521262	0.0353224
TSPAN17	NM_130465	coding	30	1	0	1	0.947475	0.106061	0	0.106061
SMYD2	NM_020197	coding	85	3	2	1	0.978495	0.232719	0.175883	0.0568356
KISS1	NM_002256	coding	52	2	2	0	0.978417	0.247002	0.247002	0
CD63	NM_001267698	coding	212	2	2	0	1	0.259414	0.259414	0
LIMCH1	NM_001112718	coding	442	3	3	0	0.989593	0.0756859	0.0756859	0
LIMCH1	NM_001112717	coding	442	3	3	0	0.988658	0.0756144	0.0756144	0
ERLEC1	NM_001127398	coding	84	0	0	0	0.984496	0	0	0
ERLEC1	NM_001127397	coding	88	0	0	0	0.985444	0	0	0
DAZAP1	NM_018959	coding	54	0	0	0	0.908497	0	0	0
USP4	NM_003363	coding	83	0	0	0	0.927732	0	0	0
PLAUR	NM_001005376	coding	62	2	2	0	0.970449	0.135934	0.135934	0
PGM3	NM_001199918	coding	92	0	0	0	0.996983	0	0	0
CDK2	NM_001798	coding	45	1	1	0	0.995541	0.142698	0.142698	0
RPL8	NM_000973	coding	876	100	57	43	1	1	0.965116	0.848837
CLDN12	NM_001185072	coding	22	0	0	0	0.982313	0	0	0
CLDN12	NM_001185073	coding	22	0	0	0	0.982313	0	0	0
PPHLN1	NM_201515	coding	42	1	1	0	0.928889	0.0817778	0.0817778	0
ST3GAL4	NM_006278	coding	49	7	7	0	0.982828	0.136364	0.136364	0
HN1L	NM_144570	coding	47	1	1	0	1	0.0820244	0.0820244	0
TMEM147	NM_001242597	coding	66	1	1	0	1	0.198864	0.198864	0
TMEM147	NM_001242598	coding	58	3	1	2	1	0.359823	0.231788	0.128035
CSNK1G2	NM_001319	coding	73	0	0	0	0.959936	0	0	0
EIF6	NM_002212	coding	277	15	14	1	1	0.742547	0.742547	0.0542005
UBXN6	NM_025241	coding	93	3	3	0	0.95098	0.156109	0.156109	0
SCRN1	NM_001145514	coding	158	3	3	0	0.954023	0.199234	0.199234	0
MRPL55	NM_181441	coding	14	1	0	1	1	0.302326	0	0.302326
ERI1	NM_153332	coding	28	0	0	0	0.91619	0	0	0
SEC23B	NM_001172745	coding	158	1	1	0	0.983941	0.0460069	0.0460069	0
RHOQ	NM_012249	coding	21	0	0	0	0.940129	0	0	0
DPH2	NM_001039589	coding	26	1	1	0	0.961832	0.0394402	0.0394402	0
STX4	NM_004604	coding	50	1	0	1	1	0.0715884	0	0.0715884
ARFGAP2	NM_001242832	coding	64	0	0	0	0.973684	0	0	0
SPAG5	NM_006461	coding	207	1	0	1	0.980179	0.014517	0	0.014517
CUL4B	NM_001079872	coding	183	6	6	0	0.969122	0.094494	0.094494	0
THYN1	NM_199297	coding	24	1	1	0	1	0.129741	0.129741	0
LEPRE1	NM_022356	coding	185	2	2	0	0.939846	0.0768883	0.0768883	0
THYN1	NM_199298	coding	27	1	1	0	1	0.0958702	0.0958702	0
TXNRD1	NM_001261445	coding	501	12	6	6	1	0.317576	0.230909	0.105455
TXNRD1	NM_001261446	coding	432	11	5	6	1	0.338384	0.235209	0.125541
NUDT4	NM_019094	coding	75	1	1	0	1	0.287293	0.287293	0
C19orf53	NM_014047	coding	54	6	4	2	1	0.963333	0.96	0.0533333
GANAB	NM_198335	coding	155	9	9	0	0.922785	0.174767	0.174767	0
TM4SF1	NM_014220	coding	344	0	0	0	1	0	0	0
ANKRD13A	NM_033121	coding	92	0	0	0	0.960519	0	0	0
ARL2	NM_001667	coding	134	8	8	0	1	0.609009	0.609009	0
PPP4R1	NM_001042388	coding	137	9	9	0	0.947424	0.0995443	0.0995443	0
ATP5H	NM_006356	coding	75	3	2	1	1	0.372428	0.304527	0.0679012
AHCY	NM_001161766	coding	256	10	10	0	1	0.394239	0.394239	0
BID	NM_197967	coding	13	1	1	0	1	0.21	0.21	0
NFE2L2	NM_001145412	coding	149	2	1	1	0.985876	0.0813559	0.0536723	0.0276836
NFE2L2	NM_001145413	coding	149	2	1	1	0.985706	0.0823328	0.0543168	0.028016
MPRIP	NM_015134	coding	216	2	2	0	0.919153	0.0481232	0.0481232	0
ACTN1	NM_001130005	coding	749	19	15	4	0.975225	0.363363	0.326577	0.112237
ACTN1	NM_001130004	coding	750	19	15	4	0.975956	0.378142	0.342441	0.108925
RPL38	NM_001035258	coding	158	13	7	6	1	0.910798	0.877934	0.535211
BTG1	NM_001731	coding	69	1	1	0	0.949612	0.184109	0.184109	0
PSMB2	NM_001199780	coding	21	1	1	0	1	0.239216	0.239216	0
PTP4A2	NM_001195101	coding	84	2	1	1	1	0.321168	0.0729927	0.248175
PTP4A2	NM_001195100	coding	84	2	1	1	1	0.307692	0.0699301	0.237762
CEP170	NM_001042405	coding	203	2	2	0	0.904403	0.0102669	0.0102669	0
CEP170	NM_001042404	coding	203	2	2	0	0.910334	0.0100874	0.0100874	0
YPEL5	NM_016061	coding	35	1	1	0	1	0.079235	0.079235	0
GLUL	NM_002065	coding	66	4	3	1	1	0.30303	0.245989	0.057041
HMBS	NM_000190	coding	55	0	0	0	0.960405	0	0	0
TMEM41B	NM_001165030	coding	18	0	0	0	0.958333	0	0	0
ITGB1BP1	NM_022334	coding	26	2	0	2	1	0.139073	0	0.139073
LAYN	NM_001258390	coding	92	1	1	0	0.961706	0.10792	0.10792	0
SCARB2	NM_005506	coding	50	1	1	0	0.924843	0.0521921	0.0521921	0
RPLP1	NM_213725	coding	242	19	13	6	1	1	0.955556	0.562963
MRPS23	NM_016070	coding	69	0	0	0	1	0	0	0
BTBD1	NM_001011885	coding	59	2	2	0	0.917962	0.104491	0.104491	0
SEPT9	NM_001113491	coding	134	14	12	2	0.9523	0.437819	0.437819	0.0147643
PPP1R12A	NM_001244992	coding	168	0	0	0	0.940855	0	0	0
TXNRD1	NM_182743	coding	461	11	5	6	1	0.312667	0.217333	0.116
TXNRD1	NM_182742	coding	461	11	5	6	1	0.312667	0.217333	0.116
PCYT2	NM_002861	coding	55	4	4	0	0.97265	0.181197	0.181197	0
RPL22	NM_000983	coding	74	3	2	1	1	0.599483	0.462532	0.286822
CSF1	NM_172212	coding	151	5	5	0	0.966967	0.138739	0.138739	0
SUN2	NM_015374	coding	95	1	1	0	0.964253	0.0543175	0.0543175	0
VTI1B	NM_006370	coding	67	5	4	1	0.982833	0.434907	0.347639	0.0872675
OGT	NM_181673	coding	181	4	4	0	0.951141	0.117326	0.117326	0
SEC62	NM_003262	coding	60	0	0	0	0.943333	0	0	0
GOLM1	NM_177937	coding	115	6	2	4	1	0.124378	0.103648	0.0688226
SLC16A3	NM_001042423	coding	341	7	7	0	0.98784	0.34907	0.34907	0
PSMB8	NM_148919	coding	44	0	0	0	0.921781	0	0	0
ZER1	NM_006336	coding	71	0	0	0	0.904824	0	0	0
SERINC2	NM_018565	coding	43	1	1	0	0.944203	0.0289855	0.0289855	0
KPNA4	NM_002268	coding	70	1	1	0	0.983397	0.0791826	0.0791826	0
STMN1	NM_203399	coding	183	4	2	2	1	0.435556	0.244444	0.231111
CDYL	NM_004824	coding	98	2	2	0	0.952294	0.162691	0.162691	0
TMPO	NM_003276	coding	157	4	4	0	0.990887	0.133333	0.133333	0
DLG1	NM_001204388	coding	128	1	0	1	0.933249	0.0185889	0	0.0185889
DLG1	NM_001204387	coding	128	1	0	1	0.919268	0.0183104	0	0.0183104
MPRIP	NM_201274	coding	215	2	2	0	0.918129	0.0487329	0.0487329	0
THBS1	NM_003246	coding	514	5	4	1	1	0.157131	0.133789	0.0233419
HIGD1A	NM_001099669	coding	31	1	1	0	1	0.322695	0.322695	0
HNRNPK	NM_031263	coding	331	14	11	3	1	0.584229	0.434409	0.174194
APEH	NM_001640	coding	118	2	2	0	0.97226	0.104593	0.104593	0
PFDN6	NM_014260	coding	34	1	1	0	1	0.115385	0.115385	0
RAB22A	NM_020673	coding	40	1	1	0	0.928205	0.198291	0.198291	0
HSPD1	NM_199440	coding	242	29	26	3	1	0.123693	0.062137	0.11324
YBEY	NM_001006114	coding	11	0	0	0	0.915301	0	0	0
MRPL19	NM_014763	coding	31	1	1	0	0.92719	0.0887372	0.0887372	0
PRMT2	NM_001535	coding	52	2	2	0	0.934716	0.114439	0.114439	0
PSME3	NM_001267045	coding	67	6	3	3	0.906015	0.27193	0.105263	0.166667
GNB2L1	NM_006098	coding	1001	82	53	29	1	0.961216	0.880503	0.704403
IL8	NM_000584	coding	156	4	3	1	1	0.556667	0.556667	0.223333
PPP4R2	NM_174907	coding	44	2	1	1	0.910686	0.085327	0.0550239	0.030303
GUK1	NM_000858	coding	103	19	15	4	1	0.867003	0.808081	0.282828
COPB1	NM_016451	coding	294	1	1	0	0.974843	0.0394829	0.0394829	0
G3BP1	NM_005754	coding	117	2	1	1	0.991435	0.0756602	0.0670949	0.0756602
P4HA2	NM_001017974	coding	52	0	0	0	0.93633	0	0	0
TNIP1	NM_006058	coding	255	15	8	7	0.980115	0.406593	0.250131	0.161172
CTSB	NM_001908	coding	200	8	7	1	1	0.543137	0.543137	0.0205882
CRLF3	NM_015986	coding	41	0	0	0	0.922498	0	0	0
PTTG1	NM_004219	coding	132	4	4	0	1	0.159278	0.159278	0
FOS	NM_005252	coding	102	0	0	0	0.989501	0	0	0
ANXA7	NM_004034	coding	118	0	0	0	0.985003	0	0	0
PRRC1	NM_130809	coding	62	0	0	0	0.934978	0	0	0
PRKCI	NM_002740	coding	62	2	2	0	0.917365	0.153546	0.153546	0
ALAS1	NM_199166	coding	114	1	0	1	0.932397	0.0598024	0	0.0598024
SLC4A7	NM_001258379	coding	166	1	1	0	0.934923	0.0191402	0.0191402	0
UBR2	NM_015255	coding	256	0	0	0	0.93489	0	0	0
CDK2AP1	NM_001270433	coding	19	4	2	2	1	0.719697	0.378788	0.67803
CISD2	NM_001008388	coding	14	0	0	0	0.965686	0	0	0
RALY	NM_007367	coding	150	1	1	0	1	0.203895	0.203895	0
ADAM9	NM_003816	coding	359	2	2	0	1	0.0247967	0.0247967	0
PSME2	NM_002818	coding	92	7	3	4	1	0.331944	0.170833	0.272222
EIF4A3	NM_014740	coding	111	4	2	2	0.970065	0.186084	0.092233	0.0938511
SMARCB1	NM_003073	coding	71	11	9	2	0.959413	0.253022	0.244387	0.0811744
PPP2CA	NM_002715	coding	142	5	4	1	1	0.172043	0.106452	0.115054
NFKBIA	NM_020529	coding	78	2	1	1	0.967505	0.118449	0.0272537	0.091195
MET	NM_000245	coding	256	6	4	2	0.976755	0.11191	0.0865085	0.0254014
NREP	NM_001142483	coding	16	0	0	0	1	0	0	0
HARS	NM_002109	coding	86	8	6	2	0.969935	0.391503	0.362745	0.203922
IL32	NM_001012636	coding	74	7	4	3	0.985185	0.466667	0.324074	0.224074
MLH1	NM_001258274	coding	56	1	1	0	0.919251	0.0574935	0.0574935	0
RCAN1	NM_203417	coding	13	0	0	0	0.903955	0	0	0
TSPYL1	NM_003309	coding	43	0	0	0	0.954338	0	0	0
PDP1	NM_018444	coding	201	3	2	1	0.984511	0.156134	0.125774	0.0303594
RAB5C	NM_004583	coding	79	2	1	1	1	0.316436	0.184332	0.132104
SRSF9	NM_003769	coding	102	2	2	0	1	0.216216	0.216216	0
ARRDC3	NM_020801	coding	64	0	0	0	0.985542	0	0	0
DYNC1I2	NM_001271790	coding	111	1	1	0	0.998911	0.0866013	0.0866013	0
HCCS	NM_001122608	coding	38	0	0	0	1	0	0	0
CDC34	NM_004359	coding	78	3	1	2	0.938115	0.348805	0.14346	0.205345
NUSAP1	NM_001243142	coding	77	4	1	3	0.976515	0.145455	0.0931818	0.0537879
NUSAP1	NM_001243143	coding	77	4	1	3	0.9758	0.149883	0.0960187	0.0554254
NUSAP1	NM_001243144	coding	74	4	1	3	0.972735	0.108179	0.0474934	0.062445
DCTN1	NM_001190836	coding	253	3	2	1	0.975478	0.0670978	0.047696	0.0194018
GIT2	NM_057170	coding	68	0	0	0	0.916667	0	0	0
SEPT2	NM_001008492	coding	126	4	2	2	1	0.116022	0.104052	0.116022
PSMD1	NM_002807	coding	101	2	2	0	0.9413	0.0545073	0.0545073	0
ZBTB44	NM_014155	coding	56	1	1	0	0.904552	0.0954479	0.0954479	0
ERCC1	NM_001166049	coding	69	4	4	0	0.978102	0.363747	0.363747	0
NUDC	NM_006600	coding	76	7	3	4	1	0.325301	0.205823	0.223896
PHYHD1	NM_174933	coding	35	0	0	0	0.922819	0	0	0
SLC1A5	NM_001145145	coding	122	2	1	1	0.997059	0.145098	0.105882	0.0392157
PRELID1	NM_001271828	coding	244	6	1	5	1	0.505582	0.191388	0.430622
PRKAR1A	NM_212471	coding	164	2	2	0	0.982548	0.21466	0.21466	0
TSPAN4	NM_001025237	coding	85	2	2	0	1	0.1841	0.1841	0
RBM39	NM_184234	coding	96	3	2	1	0.963591	0.131827	0.0878845	0.0439422
YIPF6	NM_173834	coding	32	0	0	0	0.971871	0	0	0
RASA1	NM_022650	coding	141	3	3	0	0.944126	0.0417145	0.0417145	0
RPL34	NM_033625	coding	234	16	15	1	1	0.966102	0.966102	0.344633
CNDP2	NM_001168499	coding	87	2	2	0	1	0.232143	0.232143	0
LARP4B	NM_015155	coding	132	4	4	0	0.931439	0.159675	0.159675	0
C11orf57	NM_018195	coding	44	0	0	0	0.992063	0	0	0
SDHC	NM_003001	coding	23	0	0	0	0.998039	0	0	0
TSN	NM_004622	coding	32	0	0	0	0.988355	0	0	0
FHL2	NM_001039492	coding	94	0	0	0	0.940476	0	0	0
EGFR	NM_005228	coding	200	20	10	10	0.921828	0.185246	0.151941	0.0536746
EAPP	NM_018453	coding	23	0	0	0	0.944056	0	0	0
CPSF3L	NM_017871	coding	102	0	0	0	0.966167	0	0	0
PRKCSH	NM_002743	coding	114	5	2	3	0.921865	0.150599	0.0699433	0.101449
STRA13	NM_144998	coding	26	1	1	0	0.9375	0.265625	0.265625	0
PSMF1	NM_178578	coding	39	1	1	0	1	0.00245098	0.00245098	0
TXNDC17	NM_032731	coding	32	3	2	1	1	0.389785	0.389785	0.150538
UBE2H	NM_003344	coding	38	0	0	0	1	0	0	0
XPO7	NM_015024	coding	126	2	2	0	0.942096	0.0196078	0.0196078	0
PPARG	NM_138711	coding	74	0	0	0	0.999303	0	0	0
PCBP4	NM_020418	coding	39	1	0	1	0.915051	0.0277008	0	0.0277008
HSD17B4	NM_001199291	coding	65	0	0	0	0.9007	0	0	0
PRMT1	NM_001207042	coding	321	18	18	0	1	0.667832	0.667832	0
BCAR3	NM_001261409	coding	116	1	1	0	0.944713	0.0294592	0.0294592	0
ECHDC1	NM_001105544	coding	18	1	0	1	0.976505	0.0455213	0	0.0455213
ECHDC1	NM_001105545	coding	4	0	0	0	0.953052	0	0	0
HM13	NM_178580	coding	61	2	2	0	0.994093	0.0759494	0.0759494	0
NPM1	NM_199185	coding	774	16	10	6	1	0.661654	0.506266	0.337093
STT3A	NM_152713	coding	268	2	2	0	1	0.0675165	0.0675165	0
SREK1	NM_001270492	coding	46	2	2	0	0.917323	0.0905512	0.0905512	0
IL11	NM_001267718	coding	26	0	0	0	1	0	0	0
FAU	NM_001997	coding	139	14	10	4	1	0.791045	0.599502	0.427861
PSENEN	NM_172341	coding	32	3	3	0	1	0.235294	0.235294	0
LUZP6	NM_001128619	coding	10	0	0	0	1	0	0	0
CDCA7L	NM_018719	coding	173	1	0	1	1	0.0593407	0	0.0593407
WDR13	NM_017883	coding	136	3	3	0	0.986283	0.189986	0.189986	0
BTF3	NM_001037637	coding	330	14	9	5	0.935588	0.718196	0.692432	0.2657
SNRPD2	NM_177542	coding	155	7	6	1	1	0.770642	0.764526	0.122324
CTNND1	NM_001085469	coding	147	0	0	0	0.979992	0	0	0
CTNND1	NM_001085468	coding	147	0	0	0	0.979992	0	0	0
CTNND1	NM_001085465	coding	147	0	0	0	0.9457	0	0	0
CTNND1	NM_001085464	coding	147	0	0	0	0.947022	0	0	0
CTNND1	NM_001085467	coding	147	0	0	0	0.979992	0	0	0
CTNND1	NM_001085466	coding	147	0	0	0	0.972984	0	0	0
CTNND1	NM_001085461	coding	157	0	0	0	0.978587	0	0	0
CTNND1	NM_001085460	coding	157	0	0	0	0.978587	0	0	0
CTNND1	NM_001085462	coding	157	0	0	0	0.978587	0	0	0
IDH1	NM_005896	coding	43	2	1	1	0.988755	0.146185	0.0987952	0.0473896
HDDC2	NM_016063	coding	17	0	0	0	0.934959	0	0	0
SEC24C	NM_004922	coding	107	1	1	0	0.944292	0.0219178	0.0219178	0
PSMA1	NM_148976	coding	146	0	0	0	0.974074	0	0	0
MCMBP	NM_024834	coding	111	3	2	1	0.994298	0.170036	0.0891654	0.0808709
CLDN12	NM_012129	coding	22	0	0	0	0.982313	0	0	0
PRNP	NM_001080123	coding	241	0	0	0	0.984252	0	0	0
ANKRD28	NM_015199	coding	189	2	2	0	0.975648	0.0518659	0.0518659	0
NARS	NM_004539	coding	138	3	3	0	1	0.092289	0.092289	0
RPS4X	NM_001007	coding	921	43	17	26	1	0.872475	0.67298	0.685606
ABHD4	NM_022060	coding	58	2	2	0	1	0.257532	0.257532	0
ZRANB2	NM_203350	coding	48	0	0	0	0.953676	0	0	0
PAIP1	NM_182789	coding	69	1	1	0	0.987531	0.0274314	0.0274314	0
IGFBP3	NM_000598	coding	40	0	0	0	0.924658	0	0	0
DNASE2	NM_001375	coding	78	7	5	2	0.949215	0.4506	0.4506	0.0692521
CYCS	NM_018947	coding	56	1	0	1	1	0.333333	0	0.333333
TFG	NM_006070	coding	77	6	4	2	1	0.237739	0.112219	0.12552
RAB13	NM_001272038	coding	5	33	20	13	0.826558	1	1	0.95935
C12orf43	NM_022895	coding	15	0	0	0	0.903676	0	0	0
RAP2A	NM_021033	coding	44	1	0	1	1	0.181159	0	0.181159
TRA2B	NM_001243879	coding	45	1	0	1	0.941799	0.0194004	0	0.0194004
COPS3	NM_003653	coding	56	0	0	0	0.956761	0	0	0
RND3	NM_005168	coding	89	0	0	0	1	0	0	0
MRPL27	NM_016504	coding	14	0	0	0	1	0	0	0
SERINC2	NM_178865	coding	43	1	1	0	0.961988	0.0292398	0.0292398	0
RPAIN	NM_001160244	coding	32	2	2	0	0.998073	0.171484	0.171484	0
RPS7	NM_001011	coding	455	34	16	18	1	0.864957	0.74188	0.564103
SLC7A11	NM_014331	coding	52	1	0	1	0.913679	0.062417	0	0.062417
YME1L1	NM_139312	coding	206	3	2	1	0.947459	0.0956072	0.0516796	0.0439276
CTNNBIP1	NM_020248	coding	23	1	1	0	1	0.162602	0.162602	0
RCC1	NM_001048199	coding	60	0	0	0	0.946288	0	0	0
ACOT7	NM_181866	coding	66	4	2	2	0.99899	0.164646	0.0848485	0.130303
NBL1	NM_005380	coding	26	0	0	0	0.917582	0	0	0
SRSF10	NM_001191009	coding	30	0	0	0	1	0	0	0
SRSF10	NM_001191006	coding	39	0	0	0	0.940613	0	0	0
SRSF10	NM_001191007	coding	44	0	0	0	1	0	0	0
STK4	NM_006282	coding	56	0	0	0	0.958333	0	0	0
CFL2	NM_001243645	coding	27	1	1	0	1	0.0288889	0.0288889	0
PDLIM1	NM_020992	coding	28	1	1	0	0.907071	0.111111	0.111111	0
EIF4E	NM_001968	coding	23	0	0	0	0.980122	0	0	0
YWHAQ	NM_006826	coding	177	3	2	1	0.95393	0.48645	0.485095	0.112466
YIF1A	NM_020470	coding	94	3	2	1	0.981859	0.205215	0.205215	0.105442
PKP4	NM_003628	coding	109	4	3	1	0.905281	0.104219	0.0793518	0.0248673
RSRC2	NM_023012	coding	93	0	0	0	0.937931	0	0	0
TPX2	NM_012112	coding	201	5	3	2	0.960339	0.145276	0.139483	0.0231729
RNF103-CHMP3	NM_001198954	coding	103	2	1	1	1	0.342593	0.141534	0.219577
SIKE1	NM_025073	coding	27	0	0	0	0.983974	0	0	0
UBE2J1	NM_016021	coding	30	1	1	0	0.979101	0.0491118	0.0491118	0
FOXP1	NM_001244813	coding	52	2	0	2	0.924452	0.0276817	0	0.0276817
SIGMAR1	NM_005866	coding	42	1	1	0	0.934524	0.147321	0.147321	0
COL13A1	NM_080802	coding	172	1	1	0	0.936223	0.0184355	0.0184355	0
COL13A1	NM_080801	coding	173	1	1	0	0.921456	0.0177203	0.0177203	0
COL13A1	NM_080800	coding	171	1	1	0	0.905871	0.0179525	0.0179525	0
COL13A1	NM_080805	coding	171	1	1	0	0.931806	0.0201855	0.0201855	0
CREM	NM_001267566	coding	6	0	0	0	0.959596	0	0	0
AIP	NM_003977	coding	154	1	1	0	0.976838	0.136959	0.136959	0
SSU72	NM_014188	coding	46	1	1	0	1	0.153846	0.153846	0
GID8	NM_017896	coding	58	0	0	0	1	0	0	0
LBR	NM_194442	coding	90	0	0	0	0.98539	0	0	0
RAB4A	NM_001271998	coding	12	0	0	0	0.991228	0	0	0
ATL3	NM_015459	coding	161	1	1	0	1	0.0325953	0.0325953	0
BCAT2	NM_001190	coding	47	0	0	0	0.949109	0	0	0
PNPLA6	NM_001166114	coding	163	0	0	0	0.921669	0	0	0
GUCD1	NM_031444	coding	50	1	0	1	0.965422	0.103734	0	0.103734
SPRY1	NM_005841	coding	27	0	0	0	0.932292	0	0	0
RPL9	NM_001024921	coding	1705	87	32	55	1	0.941278	0.860104	0.882556
MCM7	NM_005916	coding	155	6	6	0	1	0.0185185	0.0185185	0
SLC29A1	NM_001078175	coding	92	2	2	0	0.982495	0.115244	0.115244	0
CD55	NM_000574	coding	269	7	7	0	1	0.361257	0.361257	0
CACYBP	NM_014412	coding	56	0	0	0	0.997089	0	0	0
LXN	NM_020169	coding	23	0	0	0	0.910314	0	0	0
GLTSCR2	NM_015710	coding	165	7	6	1	0.912317	0.251914	0.251914	0.0431454
TM9SF4	NM_014742	coding	92	2	1	1	0.980819	0.059098	0.0331778	0.0259202
ITGA3	NM_002204	coding	787	12	10	2	0.989544	0.239861	0.225602	0.0234474
ENPP1	NM_006208	coding	305	4	4	0	0.964723	0.107271	0.107271	0
EEF1D	NM_001960	coding	482	52	21	31	1	0.929078	0.892435	0.747045
GINS2	NM_016095	coding	11	0	0	0	0.908602	0	0	0
TNFSF10	NM_001190942	coding	81	1	1	0	1	0.248366	0.248366	0
CRIM1	NM_016441	coding	593	4	4	0	0.986821	0.109611	0.109611	0
POMP	NM_015932	coding	32	1	1	0	1	0.0657277	0.0657277	0
RBM39	NM_001242599	coding	96	3	2	1	0.962017	0.137525	0.091683	0.0458415
LDLR	NM_001195803	coding	295	7	7	0	0.973646	0.203514	0.203514	0
LDLR	NM_001195802	coding	312	4	4	0	0.975676	0.134234	0.134234	0
LDLR	NM_001195800	coding	286	7	7	0	0.974026	0.200577	0.200577	0
MAPKAPK3	NM_001243926	coding	54	2	0	2	0.962576	0.024369	0	0.024369
XRCC5	NM_021141	coding	414	3	3	0	1	0.120055	0.120055	0
MRPS33	NM_016071	coding	22	2	0	2	1	0.127726	0	0.127726
GPI	NM_001184722	coding	151	8	7	1	0.924561	0.240936	0.202924	0.0380117
PSMD9	NM_002813	coding	45	1	0	1	0.9375	0.159226	0	0.159226
SMAGP	NM_001033873	coding	9	0	0	0	0.986395	0	0	0
IGFBP4	NM_001552	coding	597	39	39	0	1	0.700129	0.700129	0
EIF2B2	NM_014239	coding	104	3	3	0	0.986742	0.275568	0.275568	0
CSNK2B	NM_001320	coding	42	2	2	0	1	0.095679	0.095679	0
DCTN1	NM_001190837	coding	254	3	2	1	0.953354	0.0652516	0.0463836	0.0188679
SQRDL	NM_001271213	coding	72	0	0	0	0.946785	0	0	0
KRT8	NM_001256282	coding	618	30	30	0	0.97526	0.663411	0.663411	0
H3F3A	NM_002107	coding	54	1	1	0	1	0.245742	0.245742	0
PLS3	NM_001172335	coding	398	3	3	0	1	0.168874	0.168874	0
AGFG1	NM_001135187	coding	103	0	0	0	0.906553	0	0	0
AGFG1	NM_001135189	coding	102	0	0	0	0.98789	0	0	0
AGFG1	NM_001135188	coding	103	0	0	0	0.945336	0	0	0
DPH3	NM_001047434	coding	17	1	1	0	0.971264	0.0229885	0.0229885	0
CST2	NM_001322	coding	45	0	0	0	1	0	0	0
GTF3A	NM_002097	coding	49	1	1	0	0.943534	0.0628415	0.0628415	0
MLF2	NM_005439	coding	127	1	0	1	0.966533	0.109772	0	0.109772
MAPKAP1	NM_001006619	coding	125	0	0	0	0.97619	0	0	0
SRSF1	NM_006924	coding	72	0	0	0	0.975904	0	0	0
IMMT	NM_001100170	coding	119	4	3	1	0.965686	0.155971	0.103832	0.052139
NDUFC1	NM_001184986	coding	12	0	0	0	0.987013	0	0	0
GLRX	NM_001118890	coding	28	0	0	0	1	0	0	0
TMEM183A	NM_138391	coding	86	1	0	1	0.902741	0.0548187	0	0.0548187
TUBGCP2	NM_006659	coding	142	2	1	1	0.995201	0.0372831	0.0225175	0.0147656
CCNG1	NM_004060	coding	63	0	0	0	0.953829	0	0	0
RPS5	NM_001009	coding	550	53	20	33	1	1	0.995122	0.865041
DAP3	NM_001199851	coding	113	8	7	1	1	0.281192	0.241155	0.0400372
DAP3	NM_001199850	coding	119	8	7	1	1	0.275799	0.23653	0.0392694
PYGL	NM_001163940	coding	140	2	2	0	0.953317	0.0515971	0.0515971	0
ILF2	NM_004515	coding	136	5	3	2	1	0.109974	0.109974	0.0682012
IL11	NM_000641	coding	29	0	0	0	0.975	0	0	0
SRP14	NM_003134	coding	160	10	9	1	1	0.905109	0.778589	0.326034
DHX16	NM_001164239	coding	111	4	4	0	0.962322	0.0675492	0.0675492	0
ARFIP2	NM_012402	coding	94	1	1	0	1	0.0409357	0.0409357	0
MINA	NM_153182	coding	52	0	0	0	0.922031	0	0	0
LTBR	NM_002342	coding	32	2	1	1	0.928899	0.109327	0.0626911	0.0466361
LAMTOR4	NM_001008395	coding	30	2	1	1	1	0.27	0.166667	0.103333
TRIM27	NM_006510	coding	160	0	0	0	0.992218	0	0	0
GANAB	NM_198334	coding	154	9	9	0	0.920988	0.178131	0.178131	0
NREP	NM_001142477	coding	16	0	0	0	1	0	0	0
HSP90AB1	NM_001271969	coding	1917	43	34	9	1	0.788506	0.736092	0.217011
GEMIN7	NM_001007270	coding	11	0	0	0	0.969697	0	0	0
PCBP2	NM_005016	coding	65	7	7	0	1	0.326975	0.326975	0
CD81	NM_004356	coding	76	1	1	0	1	0.126582	0.126582	0
ERCC1	NM_202001	coding	67	4	4	0	0.962963	0.307613	0.307613	0
EIF3L	NM_016091	coding	339	4	2	2	1	0.163422	0.0820059	0.0814159
RND3	NM_001254738	coding	89	0	0	0	1	0	0	0
TSPAN4	NM_001025235	coding	85	2	2	0	1	0.1841	0.1841	0
TSPAN4	NM_001025236	coding	85	2	2	0	1	0.1841	0.1841	0
NCBP2	NM_001042540	coding	37	2	2	0	1	0.25	0.25	0
POLR2J	NM_006234	coding	20	0	0	0	0.957627	0	0	0
SLC35C2	NM_173179	coding	70	0	0	0	0.981785	0	0	0
MTMR2	NM_201281	coding	56	0	0	0	0.924825	0	0	0
ZSCAN26	NM_001111039	coding	42	0	0	0	0.9039	0	0	0
NDUFAF3	NM_199073	coding	43	0	0	0	1	0	0	0
SEPT11	NM_018243	coding	92	2	2	0	0.982171	0.186822	0.186822	0
MRPL35	NM_016622	coding	23	0	0	0	0.985891	0	0	0
RANGAP1	NM_002883	coding	180	7	4	3	1	0.151361	0.111678	0.0396825
CTNNB1	NM_001098209	coding	405	16	11	5	1	0.26087	0.212276	0.0673487
CLCN3	NM_001243372	coding	67	0	0	0	0.936027	0	0	0
TMED2	NM_006815	coding	190	5	3	2	1	0.430693	0.430693	0.171617
SERPINA1	NM_001127705	coding	87	1	1	0	0.9642	0.0533015	0.0533015	0
SERPINA1	NM_001127704	coding	87	1	1	0	0.9642	0.0533015	0.0533015	0
SERPINA1	NM_001127707	coding	87	1	1	0	0.9642	0.0533015	0.0533015	0
SERPINA1	NM_001127706	coding	87	1	1	0	0.9642	0.0533015	0.0533015	0
SERPINA1	NM_001127701	coding	87	1	1	0	0.9642	0.0533015	0.0533015	0
SERPINA1	NM_001127700	coding	87	1	1	0	0.9642	0.0533015	0.0533015	0
SERPINA1	NM_001127703	coding	87	1	1	0	0.9642	0.0533015	0.0533015	0
SERPINA1	NM_001127702	coding	87	1	1	0	0.9642	0.0533015	0.0533015	0
DUSP10	NM_144729	coding	35	0	0	0	1	0	0	0
CHMP1A	NM_001083314	coding	46	0	0	0	0.962656	0	0	0
SUMF2	NM_001130069	coding	131	3	3	0	0.966574	0.252553	0.252553	0
FERMT2	NM_001134999	coding	84	0	0	0	0.912791	0	0	0
ETFA	NM_000126	coding	73	2	1	1	1	0.108782	0.108782	0.0898204
DNM2	NM_001190716	coding	174	11	11	0	0.910728	0.181609	0.181609	0
SFN	NM_006142	coding	37	5	5	0	1	0.427041	0.427041	0
HPCAL1	NM_001258357	coding	103	7	4	3	1	0.659794	0.383162	0.278351
NUS1	NM_138459	coding	16	3	1	2	0.928571	0.230159	0.163265	0.0668934
GLRX	NM_001243659	coding	28	0	0	0	1	0	0	0
GLRX	NM_001243658	coding	28	0	0	0	1	0	0	0
METAP2	NM_006838	coding	129	7	6	1	0.98817	0.158664	0.158664	0.0285317
TMEM9B	NM_020644	coding	18	0	0	0	1	0	0	0
NBR1	NM_031862	coding	366	4	4	0	1	0.125129	0.125129	0
NGDN	NM_015514	coding	37	0	0	0	0.912393	0	0	0
HRAS	NM_001130442	coding	40	6	3	3	0.938596	0.185965	0.185965	0.0894737
YARS	NM_003680	coding	111	2	1	1	0.994959	0.108381	0.0573409	0.0510397
DLGAP4	NM_001042486	coding	37	2	2	0	0.952214	0.0629371	0.0629371	0
PUF60	NM_001136033	coding	110	22	12	10	0.955513	0.515152	0.289491	0.310767
POP4	NM_006627	coding	24	0	0	0	0.966817	0	0	0
MAPK9	NM_139070	coding	30	0	0	0	0.900392	0	0	0
HPCAL1	NM_134421	coding	103	7	4	3	1	0.659794	0.383162	0.278351
ZFAND2B	NM_001270999	coding	23	1	1	0	0.945483	0.105919	0.105919	0
EHF	NM_001206616	coding	68	0	0	0	0.923633	0	0	0
IARS	NM_002161	coding	212	5	3	2	0.960148	0.091317	0.0789126	0.0124043
PLAC8	NM_016619	coding	38	3	3	0	1	0.856322	0.856322	0
MTMR2	NM_016156	coding	63	0	0	0	0.93323	0	0	0
UBL7	NM_201265	coding	53	2	2	0	0.967629	0.221347	0.221347	0
MRPL33	NM_145330	coding	51	0	0	0	1	0	0	0
RAB2A	NM_002865	coding	51	1	1	0	1	0.103286	0.103286	0
HIST2H2AC	NM_003517	coding	132	1	1	0	1	0.189744	0.189744	0
VEGFA	NM_001171630	coding	101	2	2	0	1	0.123188	0.123188	0
GTF2H3	NM_001271868	coding	18	0	0	0	1	0	0	0
PSMA7	NM_002792	coding	254	6	4	2	1	0.582329	0.410977	0.203481
VAT1	NM_006373	coding	192	10	7	3	0.982234	0.275804	0.224196	0.123519
MAD2L2	NM_006341	coding	46	1	1	0	1	0.0691824	0.0691824	0
IMPA1	NM_001144879	coding	22	1	1	0	0.911223	0.0452261	0.0452261	0
CSRP1	NM_001193571	coding	67	2	2	0	0.9811	0.249141	0.249141	0
PACSIN2	NM_001184971	coding	73	3	3	0	0.996263	0.106129	0.106129	0
MORF4L2	NM_001142418	coding	348	9	7	2	1	0.514418	0.412918	0.129181
MRPL23	NM_021134	coding	70	3	0	3	0.950216	0.168831	0	0.168831
RFFL	NM_001017368	coding	21	0	0	0	0.901099	0	0	0
CTNNB1	NM_001904	coding	405	16	11	5	1	0.26087	0.212276	0.0673487
C1orf43	NM_015449	coding	199	3	3	0	1	0.30303	0.30303	0
APBB2	NM_173075	coding	124	3	3	0	0.97829	0.0502035	0.0502035	0
BCL2L1	NM_138578	coding	248	3	2	1	1	0.232194	0.195157	0.037037
GTPBP5	NM_015666	coding	48	0	0	0	0.941032	0	0	0
IFI27L2	NM_032036	coding	36	2	2	0	0.941476	0.524173	0.524173	0
PNPLA6	NM_001166112	coding	159	0	0	0	0.926211	0	0	0
TRAF1	NM_001190947	coding	52	1	1	0	1	0.0779661	0.0779661	0
RPS13	NM_001017	coding	120	6	3	3	1	0.467105	0.462719	0.388158
LYAR	NM_017816	coding	52	0	0	0	0.950877	0	0	0
PMPCB	NM_004279	coding	90	1	1	0	0.954422	0.0571429	0.0571429	0
ALDH1B1	NM_000692	coding	96	3	3	0	0.98906	0.106178	0.106178	0
SMAD3	NM_001145104	coding	44	1	1	0	1	0.145743	0.145743	0
NREP	NM_001142479	coding	16	0	0	0	1	0	0	0
PLIN2	NM_001122	coding	66	0	0	0	0.952055	0	0	0
CHCHD4	NM_144636	coding	14	0	0	0	0.987179	0	0	0
EPHA2	NM_004431	coding	326	2	2	0	0.971682	0.0105766	0.0105766	0
PLEKHA1	NM_001001974	coding	25	0	0	0	0.930041	0	0	0
ANAPC11	NM_001002248	coding	53	2	2	0	1	0.670588	0.670588	0
ZNF32	NM_006973	coding	18	1	1	0	0.937956	0.0596107	0.0596107	0
CWC15	NM_016403	coding	70	3	3	0	1	0.341074	0.341074	0
EIF5	NM_183004	coding	73	1	1	0	0.973765	0.0617284	0.0617284	0
SEC22C	NM_001201572	coding	37	0	0	0	0.946879	0	0	0
RC3H2	NM_018835	coding	119	2	2	0	0.917371	0.0450704	0.0450704	0
C12orf44	NM_021934	coding	19	1	0	1	0.99239	0.0943683	0	0.0943683
CDKN1B	NM_004064	coding	51	2	0	2	0.938023	0.246231	0	0.246231
PTPRF	NM_130440	coding	557	4	4	0	0.979989	0.0860102	0.0860102	0
PSMD11	NM_001270482	coding	98	3	3	0	0.994484	0.278172	0.278172	0
SLC39A1	NM_001271961	coding	52	1	0	1	1	0.182336	0	0.182336
CACYBP	NM_001007214	coding	39	0	0	0	1	0	0	0
CBY1	NM_015373	coding	18	0	0	0	0.900262	0	0	0
EIF4G2	NM_001418	coding	959	30	27	3	1	0.289648	0.289648	0.0293686
ZCCHC9	NM_001131035	coding	32	6	6	0	0.997549	0.136029	0.136029	0
ZCCHC9	NM_001131036	coding	32	6	6	0	0.997549	0.136029	0.136029	0
HMGB1	NM_002128	coding	130	6	6	0	1	0.476852	0.476852	0
STX4	NM_001272095	coding	39	1	0	1	1	0.0969697	0	0.0969697
GDI2	NM_001115156	coding	231	5	5	0	1	0.233583	0.233583	0
ESYT1	NM_015292	coding	124	2	2	0	0.93635	0.0455505	0.0455505	0
PRDX1	NM_181697	coding	199	4	2	2	1	0.3	0.193333	0.106667
PRDX1	NM_181696	coding	199	4	2	2	1	0.3	0.193333	0.106667
SAE1	NM_005500	coding	108	0	0	0	0.987512	0	0	0
PQBP1	NM_001167990	coding	33	1	1	0	0.94832	0.129199	0.129199	0
AK4	NM_013410	coding	21	1	1	0	0.925595	0.19494	0.19494	0
TRAPPC1	NM_001166621	coding	25	2	2	0	1	0.321918	0.321918	0
RBM39	NM_001242600	coding	96	3	2	1	0.973492	0.139165	0.0927767	0.0463883
STMN1	NM_005563	coding	183	4	2	2	1	0.435556	0.244444	0.231111
CD68	NM_001040059	coding	91	4	3	1	0.995935	0.10874	0.0680894	0.0447154
BCAR3	NM_001261408	coding	116	1	1	0	0.944713	0.0294592	0.0294592	0
ANKRD40	NM_052855	coding	60	0	0	0	1	0	0	0
ANP32E	NM_030920	coding	59	3	0	3	1	0.133829	0	0.133829
SMARCA1	NM_139035	coding	138	1	1	0	0.925216	0.0134228	0.0134228	0
BTN3A1	NM_001145008	coding	40	1	1	0	0.905483	0.0699856	0.0699856	0
CTNND1	NM_001206888	coding	153	0	0	0	0.977273	0	0	0
CTNND1	NM_001206889	coding	153	0	0	0	0.977273	0	0	0
CTNND1	NM_001206884	coding	153	0	0	0	0.970655	0	0	0
CTNND1	NM_001206886	coding	153	0	0	0	0.946095	0	0	0
CTNND1	NM_001206887	coding	153	0	0	0	0.94482	0	0	0
RBM23	NM_001077352	coding	45	1	1	0	0.940887	0.0402299	0.0402299	0
CTNND1	NM_001206883	coding	153	0	0	0	0.939891	0	0	0
ACOT7	NM_007274	coding	65	4	2	2	0.915544	0.146451	0.0754717	0.115903
E2F7	NM_203394	coding	134	0	0	0	0.945541	0	0	0
LARP4	NM_199190	coding	92	2	0	2	0.914883	0.117737	0	0.117737
B4GALT7	NM_007255	coding	39	0	0	0	0.965447	0	0	0
CHID1	NM_001142677	coding	62	0	0	0	0.986226	0	0	0
CHID1	NM_001142676	coding	63	0	0	0	0.928401	0	0	0
CHID1	NM_001142674	coding	63	0	0	0	0.98731	0	0	0
MRPL12	NM_002949	coding	47	6	1	5	0.944724	0.281407	0.144054	0.164154
ELP6	NM_001031703	coding	27	1	1	0	0.940075	0.0424469	0.0424469	0
EIF2A	NM_032025	coding	87	0	0	0	0.93686	0	0	0
AEN	NM_022767	coding	26	0	0	0	0.90593	0	0	0
ITGB1	NM_133376	coding	1433	11	11	0	1	0.249479	0.249479	0
GMNN	NM_001251991	coding	27	0	0	0	0.930159	0	0	0
GEMIN7	NM_024707	coding	11	0	0	0	0.969697	0	0	0
TRAPPC2L	NM_016209	coding	10	1	0	1	0.933806	0.234043	0	0.234043
SNRNP70	NM_003089	coding	94	4	3	1	0.905632	0.19102	0.152207	0.0388128
PGM1	NM_001172819	coding	45	0	0	0	1	0	0	0
FAM129B	NM_022833	coding	1095	40	31	9	0.969656	0.651049	0.560464	0.245426
TKT	NM_001258028	coding	302	16	10	6	0.992616	0.474684	0.358122	0.131857
SERPINB6	NM_001271825	coding	182	3	3	0	1	0.226348	0.226348	0
HIST1H2BC	NM_003526	coding	393	13	13	0	1	0.976378	0.976378	0
PTGES2	NM_001256335	coding	40	2	0	2	1	0.187166	0	0.187166
RAD23B	NM_001244724	coding	116	4	0	4	1	0.137081	0	0.137081
C20orf27	NM_001258429	coding	61	1	1	0	1	0.150476	0.150476	0
HIF1A	NM_001243084	coding	229	3	3	0	0.958089	0.0791226	0.0791226	0
IL6ST	NM_002184	coding	217	2108	2107	1	0.998549	0.0398984	0.0214001	0.0184984
PPP1R12A	NM_001143885	coding	169	0	0	0	0.944067	0	0	0
DBI	NM_001178042	coding	112	5	3	2	1	0.568254	0.568254	0.206349
CDC42SE1	NM_001038707	coding	18	1	0	1	1	0.145833	0	0.145833
RPL28	NM_001136137	coding	393	34	28	6	1	0.895238	0.895238	0.833333
TUBB4B	NM_006088	coding	478	15	10	5	1	0.452915	0.415546	0.292227
CARHSP1	NM_001042476	coding	27	0	0	0	0.936937	0	0	0
STAMBP	NM_213622	coding	66	2	2	0	1	0.0627451	0.0627451	0
ANP32B	NM_006401	coding	59	47	31	16	1	0.984127	0.984127	0.529101
GMPS	NM_003875	coding	81	3	1	2	0.963497	0.118156	0.0489914	0.0691643
CORO1B	NM_020441	coding	101	5	5	0	0.927891	0.216327	0.216327	0
CD97	NM_001784	coding	99	1	1	0	0.94751	0.0493495	0.0493495	0
SRSF11	NM_004768	coding	104	2	2	0	1	0.183505	0.183505	0
YME1L1	NM_014263	coding	202	3	2	1	0.972571	0.103208	0.055788	0.0474198
ATP5G1	NM_001002027	coding	35	3	2	1	1	0.255474	0.194647	0.0608273
NEK6	NM_001166169	coding	100	3	1	2	0.903638	0.27532	0.119961	0.155359
GRB2	NM_002086	coding	54	0	0	0	1	0	0	0
SET	NM_001248000	coding	306	16	4	12	0.942999	0.656753	0.355638	0.406444
STUB1	NM_005861	coding	65	2	2	0	0.932018	0.0712719	0.0712719	0
ACADM	NM_001127328	coding	37	0	0	0	0.931925	0	0	0
SEC31A	NM_014933	coding	334	6	6	0	0.974065	0.171171	0.171171	0
SERINC3	NM_006811	coding	178	7	7	0	1	0.277778	0.277778	0
DNAJC7	NM_001144766	coding	47	4	4	0	0.990888	0.167806	0.167806	0
ZFR	NM_016107	coding	107	1	1	0	0.91845	0.0210853	0.0210853	0
SLC16A3	NM_001206952	coding	341	7	7	0	0.98784	0.34907	0.34907	0
SP3	NM_001172712	coding	96	3	3	0	0.943089	0.0483526	0.0483526	0
DLG1	NM_001098424	coding	161	1	0	1	0.994843	0.0162063	0	0.0162063
SH3GLB1	NM_016009	coding	39	0	0	0	0.96357	0	0	0
CAB39	NM_001130850	coding	42	0	0	0	0.904483	0	0	0
MLST8	NM_001199175	coding	42	0	0	0	0.921268	0	0	0
TNFRSF10D	NM_003840	coding	53	7	7	0	0.910422	0.118002	0.118002	0
TNNT1	NM_003283	coding	105	6	4	2	0.916368	0.32497	0.27957	0.0919952
CTDSP2	NM_005730	coding	29	0	0	0	0.995098	0	0	0
MNAT1	NM_002431	coding	34	1	1	0	0.967742	0.0580645	0.0580645	0
MT1E	NM_175617	coding	79	1	1	0	1	0.354839	0.354839	0
SUMF2	NM_001042469	coding	117	3	3	0	0.960784	0.196078	0.196078	0
CSDE1	NM_007158	coding	445	5	4	1	1	0.238715	0.223524	0.015191
OSBPL8	NM_020841	coding	153	1	1	0	0.919101	0.00786517	0.00786517	0
COPA	NM_001098398	coding	385	9	7	2	0.990276	0.188547	0.168287	0.0483522
RAC1	NM_006908	coding	135	2	0	2	1	0.309154	0	0.309154
PPP6R3	NM_001164160	coding	170	3	3	0	0.96553	0.14053	0.14053	0
PPP6R3	NM_001164161	coding	170	3	3	0	0.972159	0.141495	0.141495	0
PPP6R3	NM_001164162	coding	170	3	3	0	0.971966	0.142473	0.142473	0
PPP6R3	NM_001164163	coding	170	3	3	0	0.971203	0.146351	0.146351	0
PPP6R3	NM_001164164	coding	139	4	4	0	0.968013	0.151094	0.151094	0
UBE2I	NM_194260	coding	51	1	1	0	1	0.327044	0.327044	0
UBE2I	NM_194261	coding	51	1	1	0	1	0.327044	0.327044	0
LSM5	NM_012322	coding	22	4	1	3	0.934783	0.561594	0.289855	0.561594
TARS	NM_152295	coding	362	8	3	5	1	0.154696	0.104052	0.0506446
CAPZB	NM_004930	coding	74	2	2	0	1	0.321123	0.321123	0
AURKA	NM_198437	coding	133	3	2	1	1	0.181518	0.151815	0.029703
AURKA	NM_198436	coding	133	3	2	1	1	0.181518	0.151815	0.029703
AURKA	NM_198435	coding	133	3	2	1	1	0.181518	0.151815	0.029703
AURKA	NM_198434	coding	133	3	2	1	1	0.181518	0.151815	0.029703
AURKA	NM_198433	coding	133	3	2	1	1	0.181518	0.151815	0.029703
GPANK1	NM_033177	coding	44	0	0	0	0.935574	0	0	0
GIT2	NM_014776	coding	71	0	0	0	0.906373	0	0	0
SUMO1	NM_003352	coding	33	1	1	0	1	0.0555556	0.0555556	0
ACBD5	NM_001271512	coding	49	0	0	0	0.958651	0	0	0
POLR2L	NM_021128	coding	50	0	0	0	1	0	0	0
POLDIP3	NM_032311	coding	34	2	2	0	0.960506	0.0647709	0.0647709	0
CAPZA1	NM_006135	coding	176	4	4	0	1	0.421603	0.421603	0
PI4KB	NM_001198775	coding	71	4	3	1	0.98488	0.191065	0.157388	0.033677
MSMO1	NM_001017369	coding	106	2	2	0	1	0.171779	0.171779	0
NET1	NM_001047160	coding	172	34	28	6	0.951424	0.701843	0.651591	0.14517
RALA	NM_005402	coding	16	0	0	0	0.930757	0	0	0
SCP2	NM_001007250	coding	24	0	0	0	1	0	0	0
TOMM6	NM_001134493	coding	84	1	1	0	1	0.337778	0.337778	0
TXNDC5	NM_001145549	coding	180	6	4	2	1	0.254359	0.192821	0.0615385
SMARCA1	NM_003069	coding	138	1	1	0	0.918167	0.0132701	0.0132701	0
LMNB1	NM_001198557	coding	44	1	1	0	0.979664	0.0937224	0.0937224	0
STOML2	NM_013442	coding	200	9	8	1	0.985994	0.459384	0.459384	0.0410831
SNRPB	NM_003091	coding	242	8	7	1	1	0.462644	0.431034	0.0316092
FASN	NM_004104	coding	350	40	33	7	0.906449	0.319533	0.297771	0.0362261
ST3GAL4	NM_001254757	coding	49	7	7	0	0.983034	0.134731	0.134731	0
DIABLO	NM_019887	coding	47	1	1	0	0.979167	0.0138889	0.0138889	0
ORMDL1	NM_016467	coding	18	2	2	0	0.997835	0.281385	0.281385	0
YTHDF1	NM_017798	coding	140	3	1	2	0.983929	0.116071	0.101786	0.100595
PFDN6	NM_001185181	coding	34	1	1	0	1	0.115385	0.115385	0
GPBP1	NM_022913	coding	77	0	0	0	0.951477	0	0	0
FAM195B	NM_207368	coding	100	1	1	0	1	0.187075	0.187075	0
CD63	NM_001257390	coding	212	2	2	0	1	0.259414	0.259414	0
TMEM205	NM_033408	coding	44	1	1	0	1	0.0438596	0.0438596	0
VPS26A	NM_004896	coding	36	0	0	0	0.919715	0	0	0
LAMP2	NM_001122606	coding	78	0	0	0	0.927994	0	0	0
TMEM205	NM_198536	coding	44	1	1	0	1	0.0438596	0.0438596	0
CST4	NM_001899	coding	92	5	5	0	1	0.826291	0.826291	0
MECP2	NM_004992	coding	49	2	2	0	0.909651	0.0780287	0.0780287	0
MIF	NM_002415	coding	135	18	15	3	1	1	1	0.241379
ST3GAL4	NM_001254759	coding	48	7	7	0	0.96997	0.135135	0.135135	0
C18orf32	NM_001035005	coding	11	0	0	0	1	0	0	0
MUT	NM_000255	coding	70	0	0	0	0.939636	0	0	0
C11orf31	NM_170746	coding	25	3	3	0	0.96477	0.219512	0.219512	0
RSU1	NM_012425	coding	62	1	1	0	1	0.0959233	0.0959233	0
LYAR	NM_001145725	coding	52	0	0	0	0.950877	0	0	0
STAU1	NM_001037328	coding	88	2	1	1	1	0.0722333	0.0072896	0.0649437
CHTF8	NM_001040146	coding	14	1	1	0	1	0.191257	0.191257	0
PQBP1	NM_005710	coding	33	1	1	0	0.949875	0.14787	0.14787	0
MKLN1	NM_013255	coding	55	0	0	0	0.95154	0	0	0
TGIF1	NM_003244	coding	147	3	1	2	1	0.177045	0.117216	0.0598291
C19orf48	NM_199249	coding	18	0	0	0	0.940678	0	0	0
FAT1	NM_005245	coding	1043	1	0	1	0.996949	0.0040677	0	0.0040677
ABCF2	NM_005692	coding	109	1	0	1	0.910761	0.0183727	0	0.0183727
PRRC2A	NM_080686	coding	360	12	6	6	0.910102	0.0889713	0.0639481	0.0379981
CDKN3	NM_001130851	coding	60	4	2	2	0.94605	0.171484	0.125241	0.117534
KIF22	NM_007317	coding	105	5	5	0	0.974474	0.178679	0.178679	0
LOX	NM_001178102	coding	25	0	0	0	0.989362	0	0	0
HNRNPF	NM_001098206	coding	380	11	7	4	1	0.479167	0.448718	0.155449
ECHDC1	NM_001002030	coding	20	1	0	1	0.901766	0.0342163	0	0.0342163
FAM136A	NM_032822	coding	8	0	0	0	0.940048	0	0	0
SUMO3	NM_006936	coding	85	2	2	0	1	0.528846	0.528846	0
DNAJB6	NM_005494	coding	77	3	2	1	1	0.230028	0.230028	0.084022
RPL23	NM_000978	coding	461	32	21	11	1	1	0.990544	0.825059
CDK4	NM_000075	coding	124	2	2	0	1	0.0800439	0.0800439	0
PDIA6	NM_005742	coding	347	11	8	3	1	0.529101	0.444444	0.12774
GMPR2	NM_001002000	coding	65	0	0	0	1	0	0	0
SNW1	NM_012245	coding	104	3	2	1	0.994413	0.0837989	0.0837989	0.0018622
TRIO	NM_007118	coding	625	13	9	4	0.932214	0.091672	0.063697	0.027975
TANK	NM_001199135	coding	35	0	0	0	0.974961	0	0	0
DDX3X	NM_001356	coding	143	2	0	2	0.98542	0.0598291	0	0.0598291
ERCC2	NM_000400	coding	94	2	2	0	0.91371	0.0534385	0.0534385	0
RAP1A	NM_002884	coding	28	0	0	0	0.976577	0	0	0
PTCD3	NM_017952	coding	122	1	1	0	0.975845	0.0429952	0.0429952	0
FXR1	NM_001013439	coding	192	5	5	0	0.998759	0.171943	0.171943	0
TNFSF10	NM_001190943	coding	55	1	1	0	0.974747	0.383838	0.383838	0
HMGB2	NM_001130688	coding	233	4	4	0	1	0.571429	0.571429	0
SRSF3	NM_003017	coding	217	7	2	5	1	0.367677	0.175758	0.292929
OSBPL3	NM_145320	coding	144	1	1	0	0.975885	0.0151692	0.0151692	0
OSBPL3	NM_145322	coding	142	1	1	0	0.974827	0.0158343	0.0158343	0
GIT2	NM_001135214	coding	73	0	0	0	0.912785	0	0	0
GRN	NM_002087	coding	66	3	3	0	0.947811	0.0802469	0.0802469	0
LARP4	NM_052879	coding	95	2	0	2	0.923218	0.106207	0	0.106207
PDLIM5	NM_001011513	coding	115	5	5	0	0.952869	0.124317	0.124317	0
TIMP1	NM_003254	coding	279	14	13	1	1	0.467949	0.394231	0.0737179
CDC42	NM_001039802	coding	115	0	0	0	1	0	0	0
PPIG	NM_004792	coding	74	3	1	2	0.939073	0.0843267	0.0264901	0.0578366
TIMM17A	NM_006335	coding	47	0	0	0	0.994186	0	0	0
TMEM106C	NM_001143842	coding	60	0	0	0	0.978752	0	0	0
TMEM106C	NM_001143843	coding	60	0	0	0	0.989943	0	0	0
TMEM106C	NM_001143841	coding	60	0	0	0	0.989943	0	0	0
SAA1	NM_199161	coding	32	2	2	0	1	0.319783	0.319783	0
POLD2	NM_001256879	coding	127	3	3	0	1	0.103546	0.103546	0
SLIRP	NM_031210	coding	38	0	0	0	1	0	0	0
MBP	NM_001025100	coding	68	0	0	0	0.936027	0	0	0
MGAT2	NM_002408	coding	139	3	3	0	1	0.11756	0.11756	0
ZNF185	NM_007150	coding	104	3	3	0	0.999034	0.0806763	0.0806763	0
TCEAL8	NM_001006684	coding	14	1	1	0	1	0.344633	0.344633	0
CCDC104	NM_080667	coding	41	3	3	0	0.91448	0.200194	0.200194	0
PRDX1	NM_002574	coding	199	4	2	2	1	0.3	0.193333	0.106667
ATP5A1	NM_004046	coding	344	8	5	3	1	0.224428	0.166667	0.0788207
PCYT2	NM_001184917	coding	55	4	4	0	0.929739	0.173203	0.173203	0
GSTO1	NM_001191003	coding	113	3	3	0	1	0.213396	0.213396	0
PACSIN2	NM_007229	coding	74	3	3	0	0.996578	0.0971937	0.0971937	0
ECT2	NM_018098	coding	149	1	1	0	0.983409	0.0603318	0.0603318	0
ARFRP1	NM_003224	coding	29	0	0	0	0.965347	0	0	0
HNRNPD	NM_031370	coding	34	1	1	0	0.934457	0.0617978	0.0617978	0
DYNLL1	NM_001037495	coding	66	6	6	0	1	1	1	0
GSTM3	NM_000849	coding	47	1	1	0	1	0.079646	0.079646	0
ACOT8	NM_005469	coding	71	0	0	0	0.970833	0	0	0
TNFRSF21	NM_014452	coding	79	5	4	1	0.953252	0.190041	0.155996	0.0340447
SRP72	NM_001267722	coding	149	1	1	0	0.992362	0.0769231	0.0769231	0
PHPT1	NM_001135861	coding	39	6	6	0	1	0.664	0.664	0
FAM213A	NM_001243782	coding	26	1	1	0	0.995575	0.227139	0.227139	0
RPLP2	NM_001004	coding	402	33	22	11	1	1	0.971264	0.704023
FAM213A	NM_001243778	coding	26	1	1	0	0.981159	0.223188	0.223188	0
COMT	NM_001135162	coding	53	4	2	2	1	0.192402	0.171569	0.0833333
FLYWCH2	NM_001142499	coding	20	1	0	1	0.929078	0.118203	0	0.118203
MOGS	NM_001146158	coding	113	2	2	0	0.980419	0.0591985	0.0591985	0
MMP1	NM_002421	coding	488	11	11	0	0.999291	0.266667	0.266667	0
APEX2	NM_014481	coding	51	2	2	0	0.951188	0.0571612	0.0571612	0
ZMYND11	NM_006624	coding	56	0	0	0	0.932559	0	0	0
TBCC	NM_003192	coding	71	4	3	1	0.902978	0.181556	0.176753	0.0470701
RMND5A	NM_022780	coding	43	0	0	0	0.938776	0	0	0
NQO1	NM_001025433	coding	101	5	4	1	1	0.390041	0.366528	0.141079
NQO1	NM_001025434	coding	98	5	4	1	1	0.322082	0.298172	0.14346
ADAM15	NM_207191	coding	200	5	5	0	0.964209	0.0849504	0.0849504	0
CTTN	NM_001184740	coding	89	10	5	5	0.971129	0.177953	0.177953	0.0451444
ADAM15	NM_207195	coding	208	5	5	0	0.941994	0.0782678	0.0782678	0
ADAM15	NM_207194	coding	207	5	5	0	0.932937	0.0781746	0.0781746	0
ADAM15	NM_207197	coding	208	5	5	0	0.914738	0.0760031	0.0760031	0
ADAM15	NM_207196	coding	208	5	5	0	0.915798	0.0760912	0.0760912	0
C1GALT1	NM_020156	coding	37	0	0	0	0.940476	0	0	0
DNAJB11	NM_016306	coding	38	1	1	0	0.963788	0.103993	0.103993	0
PTMA	NM_002823	coding	315	17	11	6	1	1	1	0.882883
HM13	NM_178581	coding	76	2	2	0	0.997658	0.0702576	0.0702576	0
ANXA2	NM_001002858	coding	1160	37	29	8	0.959963	0.797952	0.707635	0.431099
ANXA2	NM_001002857	coding	1156	37	29	8	1	0.840196	0.745098	0.453922
BBX	NM_020235	coding	169	4	4	0	0.955775	0.104898	0.104898	0
PSMC4	NM_006503	coding	56	1	1	0	0.953063	0.0875099	0.0875099	0
PDHX	NM_003477	coding	40	1	0	1	0.945551	0.0152722	0	0.0152722
OTUB1	NM_017670	coding	66	5	4	1	1	0.300245	0.267157	0.0796569
UBE2B	NM_003337	coding	19	0	0	0	1	0	0	0
HNRNPUL1	NM_007040	coding	121	6	4	2	0.917931	0.192143	0.0949047	0.105018
PPIE	NM_203456	coding	47	0	0	0	0.907969	0	0	0
RAB6A	NM_001243718	coding	59	3	3	0	1	0.27619	0.27619	0
RPN2	NM_002951	coding	344	6	6	0	1	0.112869	0.112869	0
KDELR2	NM_006854	coding	93	4	1	3	0.945227	0.370892	0.084507	0.345853
PTK7	NM_152880	coding	207	3	3	0	0.937601	0.0569027	0.0569027	0
ARPC4	NM_001024960	coding	35	1	0	1	1	0.270042	0	0.270042
TP53	NM_001276697	coding	30	9	7	2	0.947518	0.446809	0.446809	0.100709
WDR1	NM_005112	coding	716	10	10	0	1	0.477516	0.477516	0
CDCA4	NM_017955	coding	43	1	1	0	0.987603	0.133609	0.133609	0
CD46	NM_153826	coding	120	0	0	0	0.992208	0	0	0
SHC1	NM_001130040	coding	223	4	2	2	0.977208	0.119088	0.0643875	0.0672365
PDCD4	NM_014456	coding	38	1	1	0	0.947518	0.0446809	0.0446809	0
CDK2	NM_052827	coding	45	1	1	0	0.994969	0.161006	0.161006	0
RBPJ	NM_015874	coding	102	3	3	0	0.996585	0.0758197	0.0758197	0
SSFA2	NM_001130445	coding	175	4	0	4	0.953439	0.0486772	0	0.0486772
LASP1	NM_006148	coding	255	3	3	0	1	0.282443	0.282443	0
UBA2	NM_005499	coding	182	5	3	2	0.979199	0.205928	0.155486	0.108164
NBR1	NM_031858	coding	366	4	4	0	1	0.125129	0.125129	0
NECAP2	NM_001145278	coding	45	0	0	0	0.971989	0	0	0
NECAP2	NM_001145277	coding	52	0	0	0	0.975669	0	0	0
BACH1	NM_206866	coding	163	1	1	0	1	0.0529172	0.0529172	0
NELFCD	NM_198976	coding	93	0	0	0	0.949444	0	0	0
ADIPOR1	NM_015999	coding	102	2	1	1	0.980496	0.228723	0.0700355	0.158688
PGPEP1	NM_017712	coding	11	1	1	0	0.949206	0.052381	0.052381	0
PWP1	NM_007062	coding	98	2	2	0	0.940903	0.10757	0.10757	0
UBE2E2	NM_152653	coding	43	2	2	0	0.912541	0.229373	0.229373	0
CUEDC2	NM_024040	coding	98	11	9	2	0.979167	0.363426	0.292824	0.0763889
CISD1	NM_018464	coding	11	0	0	0	0.905199	0	0	0
EIF4A2	NM_001967	coding	394	4	4	0	1	0.213235	0.213235	0
UQCRB	NM_006294	coding	95	2	2	0	1	0.479167	0.479167	0
EXT1	NM_000127	coding	274	0	0	0	1	0	0	0
SERBP1	NM_001018067	coding	298	12	8	4	1	0.542787	0.444173	0.286064
SERBP1	NM_001018068	coding	298	12	8	4	1	0.53598	0.435897	0.275434
ZNF706	NM_001267709	coding	27	1	0	1	1	0.21645	0	0.21645
COPA	NM_004371	coding	385	9	7	2	0.990204	0.189932	0.169524	0.0487075
RAB13	NM_002870	coding	10	45	30	15	0.732026	0.998366	0.998366	0.781046
PSAT1	NM_058179	coding	97	0	0	0	0.967655	0	0	0
EEF1B2	NM_001959	coding	281	13	4	9	1	0.690265	0.545723	0.461652
CTBP1	NM_001012614	coding	141	4	4	0	0.958915	0.222481	0.222481	0
MOSPD1	NM_019556	coding	12	0	0	0	0.948598	0	0	0
SDE2	NM_152608	coding	64	1	0	1	0.932153	0.0553097	0	0.0553097
HMOX2	NM_001127206	coding	76	1	1	0	1	0.0967403	0.0967403	0
AGPAT1	NM_032741	coding	89	2	2	0	1	0.0798122	0.0798122	0
HAUS4	NM_001166270	coding	63	11	8	3	0.949843	0.286311	0.129572	0.15674
CD44	NM_001001389	coding	690	24	19	5	0.902381	0.342857	0.309524	0.128571
MAGED1	NM_006986	coding	87	7	7	0	0.940522	0.205392	0.205392	0
SLC16A3	NM_001206951	coding	341	7	7	0	0.98784	0.34907	0.34907	0
DAZAP2	NM_001136267	coding	33	0	0	0	1	0	0	0
TBRG4	NM_030900	coding	167	6	4	2	0.998084	0.161558	0.161558	0.0338442
SH3BGRL3	NM_031286	coding	104	10	7	3	1	0.843972	0.843972	0.336879
BAG6	NM_001098534	coding	408	12	11	1	0.985803	0.292221	0.265306	0.0269151
PAFAH1B2	NM_001184748	coding	40	0	0	0	0.984962	0	0	0
MRPS33	NM_053035	coding	22	2	0	2	1	0.127726	0	0.127726
RPL7A	NM_000972	coding	958	42	29	13	1	0.8402	0.837703	0.43196
KPNB1	NM_002265	coding	212	7	5	2	1	0.220448	0.208666	0.0117826
PIGK	NM_005482	coding	37	0	0	0	0.960438	0	0	0
ZMYND11	NM_001202464	coding	56	0	0	0	0.930176	0	0	0
SUMO1	NM_001005781	coding	33	1	1	0	1	0.0555556	0.0555556	0
SUMO1	NM_001005782	coding	33	1	1	0	1	0.0519481	0.0519481	0
RCN1	NM_002901	coding	250	1	1	0	0.931727	0.0381526	0.0381526	0
SMIM12	NM_001164825	coding	20	0	0	0	1	0	0	0
RPP21	NM_001199121	coding	40	1	1	0	0.983908	0.218391	0.218391	0
RPP21	NM_001199120	coding	40	1	1	0	1	0.194274	0.194274	0
QRICH1	NM_198880	coding	97	0	0	0	0.930073	0	0	0
ATP6V1G1	NM_004888	coding	54	2	2	0	1	0.568627	0.568627	0
DUSP10	NM_144728	coding	35	0	0	0	1	0	0	0
XBP1	NM_001079539	coding	216	1	1	0	0.902741	0.0238727	0.0238727	0
EGFR	NM_201283	coding	57	3	3	0	0.931034	0.0977011	0.0977011	0
STAMBP	NM_201647	coding	66	2	2	0	1	0.0627451	0.0627451	0
CENPF	NM_016343	coding	445	5	2	3	0.955163	0.0342429	0.0176565	0.0165864
HDGF	NM_001126051	coding	299	8	2	6	0.924501	0.366097	0.108262	0.321937
ASNA1	NM_004317	coding	81	6	3	3	0.971347	0.266476	0.254059	0.0754537
RPL41	NM_021104	coding	225	26	21	5	1	1	1	1
RSL1D1	NM_015659	coding	118	4	0	4	0.992532	0.149355	0	0.149355
ATPIF1	NM_178191	coding	27	4	3	1	0.978142	0.967213	0.857923	0.136612
XPOT	NM_007235	coding	193	2	2	0	0.98027	0.0882658	0.0882658	0
ERLEC1	NM_015701	coding	88	0	0	0	0.986226	0	0	0
SPRY1	NM_001258039	coding	27	0	0	0	0.932292	0	0	0
PPAPDC1B	NM_001102559	coding	22	0	0	0	0.943396	0	0	0
CRIPT	NM_014171	coding	11	0	0	0	0.915033	0	0	0
PAICS	NM_001079525	coding	216	6	5	1	0.983834	0.274057	0.200924	0.0731332
RBMS1	NM_002897	coding	33	1	0	1	0.924092	0.0594059	0	0.0594059
EXT2	NM_001178083	coding	129	8	8	0	0.972108	0.259259	0.259259	0
MRPL34	NM_023937	coding	13	1	0	1	1	0.146953	0	0.146953
GLT8D1	NM_152932	coding	48	0	0	0	0.962366	0	0	0
CD68	NM_001251	coding	92	4	3	1	0.996244	0.150235	0.112676	0.0441315
VPS72	NM_005997	coding	78	4	0	4	1	0.121461	0	0.121461
SIVA1	NM_021709	coding	25	1	1	0	1	0.024024	0.024024	0
SKP1	NM_006930	coding	104	1	1	0	0.944099	0.0703934	0.0703934	0
PCBP1	NM_006196	coding	64	4	4	0	0.943978	0.175537	0.175537	0
CSRP1	NM_001193572	coding	67	2	2	0	0.9811	0.249141	0.249141	0
SREK1	NM_139168	coding	46	2	2	0	0.915521	0.0903733	0.0903733	0
BOD1	NM_138369	coding	29	9	6	3	0.96595	0.625448	0.467742	0.274194
LMNA	NM_005572	coding	744	18	12	6	0.998255	0.633508	0.490983	0.361838
MSRB3	NM_001031679	coding	12	0	0	0	0.987455	0	0	0
ARMCX2	NM_177949	coding	112	1	1	0	0.921011	0.0531859	0.0531859	0
SPG20	NM_001142294	coding	52	0	0	0	0.918041	0	0	0
SEC61B	NM_006808	coding	30	0	0	0	1	0	0	0
AJUBA	NM_198086	coding	94	0	0	0	1	0	0	0
ZNF207	NM_003457	coding	110	7	7	0	0.989562	0.15588	0.15588	0
ITGAV	NM_001145000	coding	92	2	1	1	0.900954	0.0240211	0.00822639	0.0157947
HNRNPL	NM_001005335	coding	141	5	4	1	0.991247	0.28957	0.263311	0.0401167
KLC1	NM_001130107	coding	108	3	3	0	0.941842	0.0710824	0.0710824	0
RPSA	NM_002295	coding	769	55	22	33	1	0.890766	0.697072	0.649775
SEPW1	NM_003009	coding	40	2	1	1	1	0.333333	0.333333	0.0189394
CLDN4	NM_001305	coding	52	0	0	0	0.988889	0	0	0
OPA1	NM_130831	coding	152	1	1	0	0.95964	0.0115315	0.0115315	0
OPA1	NM_130832	coding	153	1	1	0	0.960057	0.0113114	0.0113114	0
OPA1	NM_130835	coding	158	1	1	0	0.961565	0.0108844	0.0108844	0
OPA1	NM_130834	coding	154	1	1	0	0.958461	0.0108955	0.0108955	0
OPA1	NM_130837	coding	159	1	1	0	0.959974	0.0104987	0.0104987	0
OPA1	NM_130836	coding	159	1	1	0	0.959586	0.010688	0.010688	0
PFKL	NM_002626	coding	197	2	2	0	0.934272	0.0490824	0.0490824	0
PTBP3	NM_001163790	coding	66	4	3	1	0.941847	0.121703	0.0863309	0.0419664
PFDN4	NM_002623	coding	9	3	1	2	0.940741	0.365432	0.175309	0.34321
BRD8	NM_001164326	coding	109	4	4	0	0.921569	0.0530565	0.0530565	0
AHCYL1	NM_001242673	coding	95	1	1	0	1	0.0812672	0.0812672	0
KIAA1199	NM_018689	coding	155	1	1	0	0.967205	0.0186001	0.0186001	0
MANF	NM_006010	coding	37	0	0	0	0.943534	0	0	0
C1GALT1C1	NM_152692	coding	42	0	0	0	1	0	0	0
HMOX2	NM_002134	coding	76	1	1	0	1	0.0967403	0.0967403	0
TBL1XR1	NM_024665	coding	82	0	0	0	0.96699	0	0	0
RLIM	NM_183353	coding	123	2	2	0	0.991467	0.08	0.08	0
NUP205	NM_015135	coding	216	1	1	0	0.913396	0.0182149	0.0182149	0
GPANK1	NM_001199240	coding	44	0	0	0	0.935574	0	0	0
AJUBA	NM_032876	coding	242	3	3	0	0.93321	0.100186	0.100186	0
ANTXR2	NM_001145794	coding	138	3	3	0	0.965306	0.119728	0.119728	0
SLC50A1	NM_018845	coding	51	0	0	0	0.927928	0	0	0
RPL18A	NM_000980	coding	630	126	86	40	1	0.954802	0.954802	0.728814
SLC25A3	NM_213611	coding	341	3	3	0	1	0.209024	0.209024	0
SNF8	NM_007241	coding	87	4	1	3	0.953668	0.382239	0.157014	0.225225
ZC3H15	NM_018471	coding	44	1	0	1	0.912568	0.047619	0	0.047619
PSMD6	NM_001271781	coding	52	1	1	0	0.964862	0.0959164	0.0959164	0
PFDN1	NM_002622	coding	18	0	0	0	0.98374	0	0	0
ACTR2	NM_005722	coding	104	2	2	0	1	0.0362869	0.0362869	0
CLTB	NM_001834	coding	110	2	2	0	1	0.138365	0.138365	0
COX11	NM_001162861	coding	25	1	1	0	0.917749	0.131313	0.131313	0
ANAPC16	NM_173473	coding	20	3	3	0	0.951952	0.558559	0.558559	0
GSN	NM_001127665	coding	150	3	3	0	0.981785	0.082878	0.082878	0
GSN	NM_001127667	coding	150	3	3	0	0.971288	0.081651	0.081651	0
GSN	NM_001127666	coding	150	3	3	0	0.971288	0.081651	0.081651	0
GSN	NM_001127663	coding	150	3	3	0	0.93967	0.0789931	0.0789931	0
GSN	NM_001127662	coding	150	3	3	0	0.981785	0.082878	0.082878	0
ADK	NM_001202449	coding	72	1	1	0	1	0.0711382	0.0711382	0
HDAC9	NM_014707	coding	97	1	1	0	0.922166	0.0496334	0.0496334	0
KTN1	NM_004986	coding	359	4	4	0	0.992826	0.0658468	0.0658468	0
TRIM8	NM_030912	coding	148	4	3	1	0.974638	0.126812	0.0887681	0.0380435
CFL2	NM_021914	coding	27	1	1	0	0.994012	0.0259481	0.0259481	0
ELOVL6	NM_001130721	coding	67	0	0	0	1	0	0	0
ANAPC10	NM_001256710	coding	15	1	1	0	0.947826	0.481159	0.481159	0
ANAPC10	NM_001256711	coding	15	1	1	0	0.947826	0.481159	0.481159	0
ANAPC10	NM_001256712	coding	15	1	1	0	1	0.686508	0.686508	0
ANAPC13	NM_015391	coding	16	0	0	0	1	0	0	0
MCMBP	NM_001256378	coding	111	3	2	1	0.99428	0.170567	0.0894436	0.0811232
GOLGA7	NM_001174124	coding	17	0	0	0	0.987654	0	0	0
CTDSPL	NM_005808	coding	18	0	0	0	0.908521	0	0	0
AIMP2	NM_006303	coding	41	1	0	1	1	0.0706127	0	0.0706127
SDCBP	NM_001007069	coding	90	1	1	0	1	0.0850112	0.0850112	0
SDCBP	NM_001007067	coding	90	1	1	0	1	0.0847269	0.0847269	0
PTK2	NM_153831	coding	190	6	2	4	0.973726	0.112377	0.0278569	0.0845204
EIF2S1	NM_004094	coding	96	2	1	1	1	0.0907173	0.021097	0.0696203
PTBP3	NM_001244896	coding	62	1	1	0	0.969432	0.0582242	0.0582242	0
ALDOA	NM_000034	coding	768	57	43	14	1	0.843836	0.83653	0.390868
BLVRA	NM_000712	coding	66	0	0	0	1	0	0	0
NDUFC1	NM_001184989	coding	12	0	0	0	0.987013	0	0	0
NIPAL3	NM_020448	coding	49	0	0	0	0.923833	0	0	0
NDUFC1	NM_001184987	coding	12	0	0	0	0.987013	0	0	0
NEDD4L	NM_001144968	coding	125	1	1	0	0.902548	0.0120523	0.0120523	0
NEDD4L	NM_001144969	coding	125	1	1	0	0.921589	0.0123066	0.0123066	0
NEDD4L	NM_001144965	coding	110	1	1	0	0.905653	0.0136452	0.0136452	0
GAR1	NM_018983	coding	21	0	0	0	0.958716	0	0	0
IL32	NM_001012631	coding	74	7	4	3	0.985891	0.444444	0.308642	0.213404
IL32	NM_001012633	coding	67	5	2	3	1	0.388889	0.194444	0.305556
HIF1A	NM_001530	coding	229	3	3	0	1	0.0898831	0.0898831	0
SIVA1	NM_006427	coding	30	1	1	0	1	0.0151515	0.0151515	0
CAV2	NM_198212	coding	129	2	2	0	1	0.253687	0.253687	0
ZCRB1	NM_033114	coding	24	1	0	1	0.95107	0.102446	0	0.102446
CASP4	NM_033306	coding	67	2	2	0	0.991718	0.187371	0.187371	0
API5	NM_001142930	coding	73	0	0	0	0.966349	0	0	0
API5	NM_001142931	coding	70	0	0	0	0.960828	0	0	0
NELFE	NM_002904	coding	149	0	0	0	0.989501	0	0	0
FBXO28	NM_015176	coding	57	0	0	0	0.902439	0	0	0
ITGB1	NM_033668	coding	1420	11	11	0	0.968828	0.248545	0.248545	0
ATP6AP2	NM_005765	coding	69	2	1	1	0.967711	0.215575	0.158594	0.0569801
TSPAN4	NM_001025234	coding	85	2	2	0	1	0.1841	0.1841	0
CNIH	NM_005776	coding	39	0	0	0	1	0	0	0
TYW3	NM_001162916	coding	15	1	1	0	0.929515	0.234949	0.234949	0
C16orf80	NM_013242	coding	20	0	0	0	0.917526	0	0	0
CIB1	NM_006384	coding	46	3	0	3	0.940972	0.147569	0	0.147569
FCGRT	NM_004107	coding	60	1	1	0	0.943534	0.0737705	0.0737705	0
ZNF185	NM_001178110	coding	102	3	3	0	0.998943	0.0882198	0.0882198	0
PLIN3	NM_001164189	coding	263	12	10	2	1	0.479263	0.479263	0.0491551
TBC1D23	NM_018309	coding	56	1	1	0	0.911922	0.0515815	0.0515815	0
NPM1	NM_002520	coding	775	16	10	6	1	0.613559	0.456497	0.320904
MCRS1	NM_001012300	coding	78	1	1	0	0.962885	0.0434174	0.0434174	0
RPS24	NM_033022	coding	525	42	26	16	1	0.964377	0.964377	0.816794
VRK1	NM_003384	coding	36	5	1	4	0.937867	0.141058	0.0285474	0.11251
SRP9	NM_001130440	coding	45	2	2	0	0.987952	0.473896	0.473896	0
CELF1	NM_198700	coding	90	2	1	1	0.938705	0.09573	0.0612948	0.0344353
GNL3	NM_206826	coding	175	1	1	0	1	0.0762082	0.0762082	0
GNL3	NM_206825	coding	175	1	1	0	1	0.0762082	0.0762082	0
ZNHIT3	NM_004773	coding	17	0	0	0	1	0	0	0
BUB3	NM_004725	coding	303	2	2	0	1	0.103343	0.103343	0
INPPL1	NM_001567	coding	208	2	2	0	0.954196	0.0328303	0.0328303	0
TACC1	NM_001122824	coding	61	0	0	0	0.970539	0	0	0
PFDN5	NM_145897	coding	82	5	3	2	1	0.578788	0.448485	0.248485
TRPT1	NM_001160390	coding	19	1	1	0	0.912073	0.0721785	0.0721785	0
CTNND1	NM_001085459	coding	157	0	0	0	0.949117	0	0	0
RTFDC1	NM_016407	coding	134	0	0	0	1	0	0	0
TCEAL4	NM_024863	coding	24	2	1	1	0.916667	0.368827	0.316358	0.0524691
TEX264	NM_001243727	coding	89	1	1	0	0.941667	0.175	0.175	0
AP2B1	NM_001282	coding	457	7	7	0	1	0.141791	0.141791	0
RPS15A	NM_001030009	coding	327	20	13	7	1	0.882952	0.882952	0.722646
DOLK	NM_014908	coding	25	0	0	0	0.906617	0	0	0
PCBP4	NM_001174100	coding	40	1	0	1	0.924092	0.070132	0	0.070132
CHMP5	NM_016410	coding	133	0	0	0	1	0	0	0
MBNL1	NM_021038	coding	47	0	0	0	0.990426	0	0	0
HNRNPH1	NM_005520	coding	95	6	5	1	0.988889	0.33037	0.279259	0.0511111
APEX1	NM_001244249	coding	75	1	1	0	1	0.0835946	0.0835946	0
CCDC43	NM_144609	coding	22	0	0	0	0.991111	0	0	0
FAM64A	NM_019013	coding	26	2	2	0	0.910739	0.133891	0.133891	0
ARFRP1	NM_001267549	coding	29	0	0	0	0.992337	0	0	0
ARFRP1	NM_001267545	coding	22	0	0	0	1	0	0	0
ARFRP1	NM_001267544	coding	25	0	0	0	1	0	0	0
ARFRP1	NM_001267547	coding	29	0	0	0	0.965347	0	0	0
ARFRP1	NM_001267546	coding	27	0	0	0	0.954839	0	0	0
KDELR3	NM_016657	coding	18	0	0	0	0.965309	0	0	0
TAP1	NM_000593	coding	238	2	2	0	0.940667	0.052328	0.052328	0
PHB2	NM_001267700	coding	110	1	1	0	0.94402	0.183206	0.183206	0
TECR	NM_138501	coding	188	4	3	1	1	0.318231	0.283711	0.03452
MPP1	NM_001166460	coding	24	5	4	1	0.908889	0.0592593	0.0592593	0.0155556
BLZF1	NM_003666	coding	31	0	0	0	0.915212	0	0	0
ASPH	NM_001164754	coding	85	3	1	2	0.989831	0.152542	0.119774	0.0327684
GNA15	NM_002068	coding	55	0	0	0	0.933333	0	0	0
MLST8	NM_001199174	coding	42	0	0	0	0.921509	0	0	0
H2AFV	NM_201516	coding	75	4	4	0	1	0.925373	0.925373	0
COPE	NM_007263	coding	181	21	17	4	1	0.842503	0.842503	0.0906149
SERTAD3	NM_013368	coding	26	1	1	0	0.910321	0.0879865	0.0879865	0
HSD3B7	NM_001142777	coding	17	1	1	0	0.964467	0.0541455	0.0541455	0
SLC20A1	NM_005415	coding	150	4	1	3	1	0.129412	0.0588235	0.0705882
HSD3B7	NM_001142778	coding	17	1	1	0	0.964467	0.0541455	0.0541455	0
LBR	NM_002296	coding	90	0	0	0	0.98539	0	0	0
STT3B	NM_178862	coding	182	0	0	0	0.962515	0	0	0
TUBB	NM_178014	coding	2595	51	43	8	1	0.907116	0.907116	0.198502
PRDX3	NM_006793	coding	143	1	1	0	1	0.194553	0.194553	0
VPS26A	NM_001035260	coding	27	0	0	0	0.910053	0	0	0
ADAM15	NM_001261464	coding	207	5	5	0	0.96202	0.079596	0.079596	0
STAT3	NM_213662	coding	88	3	2	1	0.929	0.0871369	0.0539419	0.033195
PRMT2	NM_001242866	coding	40	2	2	0	1	0.178657	0.178657	0
CD59	NM_000611	coding	145	5	5	0	1	0.328165	0.328165	0
CD74	NM_001025158	coding	31	10	10	0	1	0.488613	0.488613	0
CD74	NM_001025159	coding	39	10	10	0	0.924804	0.325477	0.325477	0
GNA11	NM_002067	coding	50	2	1	1	0.977778	0.174074	0.0731481	0.100926
RASSF1	NM_170713	coding	28	2	2	0	0.906519	0.102091	0.102091	0
MICB	NM_005931	coding	113	1	1	0	1	0.126736	0.126736	0
GALK1	NM_000154	coding	53	4	3	1	0.927057	0.189992	0.149279	0.0407125
TGIF1	NM_173208	coding	147	3	1	2	1	0.177045	0.117216	0.0598291
NRBP1	NM_013392	coding	235	7	7	0	1	0.276119	0.276119	0
UQCC	NM_199487	coding	53	1	1	0	1	0.0705596	0.0705596	0
PPP1R3B	NM_024607	coding	23	0	0	0	0.988345	0	0	0
FYN	NM_153048	coding	45	0	0	0	0.919255	0	0	0
COMT	NM_000754	coding	53	4	2	2	1	0.192402	0.171569	0.0833333
RPP25L	NM_148178	coding	22	1	1	0	1	0.191057	0.191057	0
RPP25L	NM_148179	coding	22	1	1	0	1	0.191057	0.191057	0
SF3B14	NM_016047	coding	119	1	1	0	1	0.179894	0.179894	0
TSPO	NM_001256530	coding	43	3	3	0	0.976471	0.35098	0.35098	0
EZR	NM_001111077	coding	165	12	8	4	0.975582	0.353776	0.239637	0.162976
ATG12	NM_004707	coding	33	1	0	1	1	0.196217	0	0.196217
DHX9	NM_001357	coding	225	3	3	0	0.988461	0.0555993	0.0555993	0
QSOX1	NM_001004128	coding	355	8	6	2	0.993388	0.28595	0.239669	0.046281
CCT5	NM_012073	coding	469	13	11	2	1	0.543665	0.440959	0.103321
MFAP3	NM_001135037	coding	14	0	0	0	0.904762	0	0	0
YAP1	NM_001195045	coding	114	0	0	0	1	0	0	0
C17orf62	NM_001193655	coding	13	0	0	0	0.932624	0	0	0
HIST1H3B	NM_003537	coding	514	5	4	1	1	0.635036	0.635036	0.141119
PMF1	NM_001199653	coding	51	1	1	0	0.992634	0.149171	0.149171	0
NDUFS6	NM_004553	coding	30	2	2	0	1	0.426667	0.426667	0
SERPINB6	NM_001271823	coding	182	3	3	0	0.959596	0.215488	0.215488	0
COX8A	NM_004074	coding	127	3	1	2	1	0.704762	0.371429	0.333333
BAD	NM_004322	coding	32	2	2	0	0.990138	0.00197239	0.00197239	0
ANXA2	NM_001136015	coding	1156	37	29	8	1	0.840196	0.745098	0.453922
RPL17-C18orf32	NM_001199355	coding	692	39	19	20	1	0.737991	0.684134	0.512373
PGM2	NM_018290	coding	80	0	0	0	0.909734	0	0	0
ZC3H11A	NM_014827	coding	259	4	4	0	0.988081	0.143033	0.143033	0
TFAM	NM_003201	coding	31	1	1	0	0.906883	0.0877193	0.0877193	0
NPTN	NM_017455	coding	40	4	0	4	0.998822	0.248528	0	0.248528
RPL32	NM_001007073	coding	382	38	21	17	1	0.919118	0.764706	0.919118
APBB2	NM_001166054	coding	23	0	0	0	0.968404	0	0	0
APBB2	NM_001166053	coding	23	0	0	0	0.968404	0	0	0
POLR2E	NM_002695	coding	81	4	4	0	1	0.600316	0.600316	0
PSME3	NM_005789	coding	70	6	3	3	0.968627	0.28366	0.109804	0.173856
MGST1	NM_001260511	coding	31	6	2	4	0.929487	0.711538	0.17094	0.587607
DPP7	NM_013379	coding	139	7	7	0	0.993239	0.171738	0.171738	0
GSN	NM_198252	coding	150	3	3	0	0.981785	0.082878	0.082878	0
MAT2A	NM_005911	coding	117	2	0	2	1	0.0378788	0	0.0378788
CCDC124	NM_001136203	coding	74	2	0	2	1	0.145833	0	0.145833
RNF41	NM_005785	coding	41	1	1	0	0.922432	0.0555556	0.0555556	0
ZFAND5	NM_001102420	coding	38	0	0	0	0.911215	0	0	0
[truncated: 4,190 more rows]
