# Supplementary material for: Characterization of RNA in exosomes secreted by human breast cancer cell lines using next-generation sequencing
Source: PeerJ. 2013 Nov 5;1:e201. doi: 10.7717/peerj.201 (PMC3828613; doi:10.7717/peerj.201)
Supplement: Table S2 — (A) Gene lists for GO enrichment analysis. (B) GO enrichment of cellular genes. (C) GO enrichment of exosomal genes. (D) GO enrichment of top 115 expressed cellular genes. [file peerj-01-201-s007.xlsx]

## Sheet: Additional File 2
Supplemental Table 2. Gene Ontology (GO) enrichment analysis using the DAVID bioinformatics resource of Genes found in cellular and exosomal.
	A. gene lists for GO analysis
	B. GO enrichment of cellular genes
	C. GO enrichment of exosomal genes
	D. GO enrichment of top 115 expressed cellular genes

## Sheet: A
MDA-MB-231 Cellular Genes	Top 115 expressed genes from MDA-MB-231 Cellular	Exosomal Genes from Both Cell Lines	Exosomal Genes Overlapped in Both Exosomal Transcripts	Overlapped Exosomal and Cellular Genes in MDA-MB-231 Cell Line but not in MDA-MB-436 Cell Line
n=3115	n=115	n=115	n=68	n=45
AAMP	TMSB4X	ACTB	ACTB	ACTG1
AAR2	EEF1A1	ACTG1	ANP32B	ATP5L
AARS	MT-CO1	ANP32B	COX4I1	ATPIF1
AASDHPPT	RPS18	ATP5L	COX7B	BTF3
ABCE1	MT-CO2	ATPIF1	EEF1A1	C12orf75
ABCF1	RPL13A	BTF3	EEF1D	C19orf53
ABCF2	S100A6	C12orf75	EEF1G	CFL1
ABHD10	VIM	C19orf53	FTH1	COPE
ABHD16A	GAPDH	CFL1	FTL	COX6A1
ABHD4	TUBB	COPE	GAPDH	DYNLL1
ABHD5	RPS23	COX4I1	GNB2L1	EIF4A1
ABI1	LGALS1	COX6A1	HNRNPA1	EIF5A
ABL2	RPL23A	COX7B	LGALS1	ENO1
ABR	UBB	DYNLL1	MYL6	H2AFV
ABRACL	TXNIP	EEF1A1	PPIA	HIST1H1E
ABT1	CALR	EEF1D	PTMA	HIST1H2BC
ABTB1	RPS2	EEF1G	RPL10	HIST1H3C
ACADM	RPLP0	EIF4A1	RPL11	MIF
ACADVL	RPL9	EIF5A	RPL13	MT-CO2
ACAT1	RPS11	ENO1	RPL13A	MT2A
ACAT2	RPL3	FTH1	RPL15	MYL12A
ACBD5	CLIC1	FTL	RPL17	NGFRAP1
ACIN1	RPL10A	GAPDH	RPL18A	PFN1
ACLY	RPL28	GNB2L1	RPL19	PKM
ACO1	MT-CO3	H2AFV	RPL23	RHOC
ACOT13	HIST1H1C	HIST1H1E	RPL24	RPL10A
ACOT7	EEF1G	HIST1H2BC	RPL26	RPL12
ACOT8	COX6A1	HIST1H3C	RPL27A	RPL18
ACOT9	RPS6	HNRNPA1	RPL28	RPL29
ACP1	CFL1	LGALS1	RPL3	RPL34
ACSF2	RPL18A	MIF	RPL30	RPL39
ACSL3	PPIA	MT-CO2	RPL32	RPS10
ACSL4	RPL7A	MT2A	RPL35	RPS11
ACSL5	RPL35	MYL12A	RPL35A	RPS29
ACSS2	HIST1H3C	MYL6	RPL37	S100A11
ACTB	HSPA8	NGFRAP1	RPL37A	S100A13
ACTG1	RPS15	PFN1	RPL38	S100A16
ACTL6A	RPL31	PKM	RPL41	SF3B5
ACTN1	RPS4X	PPIA	RPL8	SRP14
ACTN4	RPS8	PTMA	RPL9	TAGLN2
ACTR10	RPL36	RAB13	RPLP0	TCEB2
ACTR1A	TMSB10	RHOC	RPLP1	TUBB
ACTR1B	MT-ND4L	RPL10	RPLP2	UBA52
ACTR2	FTL	RPL10A	RPS12	UBB
ACTR3	RPS16	RPL11	RPS14	UQCRQ
ACY1	RPL19	RPL12	RPS15
ACYP1	ENO1	RPL13	RPS16
ADAM10	SERPINE1	RPL13A	RPS18
ADAM15	RPL10	RPL15	RPS19
ADAM8	RPS24	RPL17	RPS2
ADAM9	EIF4A1	RPL18	RPS20
ADAR	RPL5	RPL18A	RPS21
ADCK2	KRT19	RPL19	RPS23
ADCK3	CYR61	RPL23	RPS24
ADH5	RPL23	RPL24	RPS27A
ADIPOR1	RPLP2	RPL26	RPS28
ADIRF	RPL35A	RPL27A	RPS3
ADK	RPS3A	RPL28	RPS5
ADORA2B	RPL17	RPL29	RPS8
ADPGK	RPL27A	RPL3	RPS9
ADRB2	RPL29	RPL30	S100A6
ADRBK1	GNB2L1	RPL32	SERF2
ADRM1	RPS25	RPL34	SNRPG
ADSS	HIST1H1E	RPL35	TMSB10
AEN	RPL36A	RPL35A	TMSB4X
AES	RPS5	RPL37	TPM4
AFAP1	MYL6	RPL37A	TPT1
AFF4	RPS12	RPL38	VIM
AGAP3	HSP90AA1	RPL39
AGFG1	RPL12	RPL41
AGO2	RPL26	RPL8
AGPAT1	HIST1H2BC	RPL9
AGPAT2	RPL11	RPLP0
AGPAT3	TCEB2	RPLP1
AGPAT5	RPL21	RPLP2
AHCY	TPT1	RPS10
AHCYL1	RPL4	RPS11
AHNAK	RPL13	RPS12
AHSA1	MT-ND3	RPS14
AIDA	RPS7	RPS15
AIFM1	CALM2	RPS16
AIMP1	RPLP1	RPS18
AIMP2	HSPA5	RPS19
AIP	RPS28	RPS2
AJUBA	RPL7	RPS20
AK2	ERRFI1	RPS21
AK3	HIST1H2AC	RPS23
AK4	HIST1H3B	RPS24
AKAP2	RPS14	RPS27A
AKR1A1	HIST1H4C	RPS28
AKR1B1	MT-ND4	RPS29
AKT1	RPL37	RPS3
AKT2	RPS20	RPS5
ALAS1	HIST1H4B	RPS8
ALCAM	IGFBP4	RPS9
ALDH18A1	AXL	S100A11
ALDH1B1	RPS27	S100A13
ALDH6A1	RPL24	S100A16
ALDH7A1	PRSS23	S100A6
ALDH9A1	ATP5J2	SERF2
ALDOA	EEF2	SF3B5
ALG13	RPL8	SMCO4
ALG2	CD44	SNRPG
ALG5	PHLDA1	SRP14
ALKBH5	DKK1	TAGLN2
ALKBH7	B2M	TCEB2
AMOTL2	RPS21	TMSB10
AMZ2	HSP90B1	TMSB4X
ANAPC10	RPS3	TPM4
ANAPC11	BTF3	TPT1
ANAPC13	RPL37A	TUBB
ANAPC16	RPL18	UBA52
ANAPC5	RPL27	UBB
ANKIB1	YWHAE	UQCRQ
ANKRD1	NPM1	VIM
ANKRD13A
ANKRD13C
ANKRD28
ANKRD29
ANKRD40
ANLN
ANP32A
ANP32B
ANP32E
ANTXR2
ANXA1
ANXA11
ANXA2
ANXA3
ANXA5
ANXA6
ANXA7
AP005482.1
AP1S1
AP2A1
AP2B1
AP2M1
AP2S1
AP3M1
APBB2
APEH
APEX1
APEX2
APH1A
API5
APLP2
APMAP
APOA1BP
APP
ARCN1
ARF1
ARF3
ARF4
ARF5
ARF6
ARFGAP1
ARFGAP2
ARFGAP3
ARFIP2
ARFRP1
ARGLU1
ARHGAP18
ARHGAP29
ARHGAP35
ARHGAP5
ARHGDIA
ARHGDIB
ARHGEF1
ARHGEF12
ARIH2
ARL1
ARL2
ARL2BP
ARL3
ARL4C
ARL4D
ARL6IP1
ARL6IP5
ARL8A
ARL8B
ARMC6
ARMCX1
ARMCX2
ARPC1A
ARPC1B
ARPC2
ARPC4
ARPC5
ARPP19
ARRDC3
ASAP2
ASB1
ASNA1
ASPH
ASXL1
ATF3
ATF4
ATF6
ATF6B
ATG12
ATG13
ATL3
ATOX1
ATP13A3
ATP1A1
ATP1B1
ATP2A2
ATP2B4
ATP2C1
ATP5A1
ATP5B
ATP5C1
ATP5E
ATP5F1
ATP5G1
ATP5G2
ATP5G3
ATP5H
ATP5I
ATP5J
ATP5J2
ATP5L
ATP5O
ATP5S
ATP6AP1
ATP6AP2
ATP6V0B
ATP6V0E1
ATP6V1A
ATP6V1B2
ATP6V1C1
ATP6V1D
ATP6V1E1
ATP6V1F
ATP6V1G1
ATPAF1
ATPIF1
ATRAID
ATXN10
ATXN7L3B
AUP1
AURKA
AURKAIP1
AURKB
AVPI1
AXL
AZIN1
B2M
B4GALT5
B4GALT7
BABAM1
BACH1
BAD
BAG1
BAG2
BAG6
BAK1
BANF1
BAP1
BAX
BBIP1
BBX
BCAP31
BCAR3
BCAT2
BCCIP
BCL10
BCL2L1
BCL2L13
BCLAF1
BECN1
BET1
BET1L
BHLHE40
BID
BIRC2
BIRC5
BLVRA
BLVRB
BLZF1
BMI1
BNIP3
BOD1
BPNT1
BRD2
BRD8
BRIX1
BRK1
BRMS1
BRPF3
BSCL2
BSDC1
BSG
BST2
BTBD1
BTBD3
BTF3
BTF3L4
BTG1
BTG3
BTN3A1
BUB1
BUB3
BUD13
BUD31
BYSL
BZW1
C11orf31
C11orf57
C11orf58
C11orf83
C11orf84
C12orf23
C12orf29
C12orf43
C12orf44
C12orf49
C12orf57
C12orf75
C14orf1
C14orf119
C14orf166
C14orf2
C15orf40
C15orf41
C15orf48
C16orf80
C17orf49
C17orf62
C18orf32
C19orf10
C19orf33
C19orf48
C19orf53
C19orf70
C1GALT1
C1GALT1C1
C1orf122
C1orf123
C1orf151-NBL1
C1orf198
C1orf21
C1orf43
C1orf52
C20orf111
C20orf27
C21orf33
C22orf28
C4orf3
C5orf15
C5orf24
C5orf30
C6orf1
C6orf106
C6orf48
C6orf62
C6orf89
C7orf55
C7orf55-LUC7L2
C9orf16
C9orf78
C9orf89
CAB39
CACYBP
CALCOCO2
CALD1
CALM1
CALM2
CALM3
CALR
CALU
CAMLG
CAMTA1
CAND1
CANT1
CANX
CAP1
CAP2
CAPG
CAPN1
CAPN2
CAPNS1
CAPRIN1
CAPZA1
CAPZA2
CAPZB
CARHSP1
CARS
CASK
CASP3
CASP4
CASP8
CAST
CAT
CAV1
CAV2
CBR1
CBX1
CBX3
CBY1
CCDC104
CCDC12
CCDC124
CCDC130
CCDC167
CCDC23
CCDC43
CCDC50
CCDC53
CCDC59
CCDC85B
CCM2
CCNA2
CCNB1
CCNB1IP1
CCND1
CCNDBP1
CCNG1
CCNH
CCNI
CCNL1
CCNL2
CCNY
CCS
CCT2
CCT3
CCT4
CCT5
CCT6A
CCT7
CCT8
CD151
CD164
CD274
CD2AP
CD40
CD44
CD46
CD47
CD55
CD59
CD63
CD68
CD74
CD81
CD82
CD9
CD97
CD99L2
CDC123
CDC20
CDC26
CDC34
CDC37
CDC42
CDC42EP2
CDC42EP3
CDC42SE1
CDC5L
CDCA3
CDCA4
CDCA5
CDCA7L
CDCP1
CDH11
CDK1
CDK16
CDK2
CDK2AP1
CDK4
CDK5RAP3
CDK6
CDK7
CDK9
CDKAL1
CDKN1B
CDKN2C
CDKN2D
CDKN3
CDR2
CDV3
CDYL
CEBPG
CECR5
CELF1
CENPF
CENPN
CENPW
CEP170
CEP55
CERCAM
CERS2
CETN2
CETN3
CFB
CFDP1
CFL1
CFL2
CFLAR
CGGBP1
CHCHD1
CHCHD2
CHCHD3
CHCHD4
CHIC2
CHID1
CHML
CHMP1A
CHMP1B
CHMP2A
CHMP2B
CHMP3
CHMP4B
CHMP5
CHP1
CHPF2
CHRAC1
CHST11
CHTF8
CHTOP
CIB1
CINP
CISD1
CISD2
CITED2
CKAP2
CKAP4
CKAP5
CKB
CKS1B
CKS2
CLCN3
CLDN12
CLDN4
CLDN7
CLDND1
CLIC1
CLIC4
CLINT1
CLIP1
CLIP4
CLPP
CLPTM1L
CLTB
CLTC
CMBL
CMC4
CMPK1
CMSS1
CNBP
CNDP2
CNIH
CNIH4
CNN3
CNOT7
CNP
CNPY3
COA1
COA3
COA4
COA5
COL13A1
COL8A1
COLGALT1
COMMD10
COMMD4
COMMD5
COMMD7
COMMD9
COMT
COPA
COPB1
COPB2
COPE
COPG1
COPS2
COPS3
COPS5
COPS6
COPS7A
COPS8
COPZ1
COQ9
CORO1B
CORO1C
COX11
COX14
COX16
COX4I1
COX5B
COX6A1
COX6A1P2
COX6B1
COX6C
COX7A2L
COX7B
COX7C
COX8A
CPD
CPNE1
CPNE3
CPPED1
CPSF2
CPSF3L
CPSF4
CRCP
CREB3
CREBL2
CREBRF
CREM
CRIM1
CRIPT
CRK
CRLF3
CRTAP
CSDE1
CSE1L
CSF1
CSNK1A1
CSNK1D
CSNK1E
CSNK1G2
CSNK2A1
CSNK2B
CSRNP1
CSRP1
CST1
CST2
CST4
CST7
CSTB
CSTF1
CTBP1
CTBP2
CTDNEP1
CTDSP1
CTDSP2
CTDSPL
CTGF
CTNNA1
CTNNAL1
CTNNB1
CTNNBIP1
CTNND1
CTSB
CTSC
CTSD
CTSL1
CTTN
CUEDC2
CUL4A
CUL4B
CUL7
CUTA
CWC15
CXADR
CXCR4
CXorf40B
CYB561
CYB5A
CYB5B
CYB5R3
CYBRD1
CYCS
CYFIP1
CYP1B1
CYR61
CYSTM1
CYTH2
DAD1
DAP
DAP3
DARS
DAXX
DAZAP1
DAZAP2
DBI
DBNDD2
DCAF7
DCAF8
DCAKD
DCBLD2
DCTD
DCTN1
DCTN2
DCTN4
DCXR
DDA1
DDAH1
DDAH2
DDB1
DDIT3
DDIT4
DDOST
DDX1
DDX17
DDX21
DDX24
DDX27
DDX39A
DDX39B
DDX3X
DDX41
DDX46
DDX47
DDX49
DDX5
DDX54
DDX56
DDX6
DEGS1
DEK
DENND5A
DENR
DERL2
DFNA5
DGUOK
DHCR24
DHCR7
DHPS
DHX15
DHX16
DHX30
DHX9
DIABLO
DIMT1
DKC1
DKK1
DLAT
DLC1
DLD
DLG1
DLG3
DLGAP4
DLGAP5
DLST
DNAJA1
DNAJA2
DNAJB1
DNAJB11
DNAJB6
DNAJC19
DNAJC5
DNAJC7
DNAJC8
DNASE2
DNM2
DNMBP
DNPEP
DNTTIP1
DNTTIP2
DOLK
DPH2
DPH3
DPH5
DPM2
DPM3
DPP3
DPP7
DPY30
DPYSL2
DR1
DRAP1
DRG1
DSCR3
DSG2
DSN1
DSP
DSTN
DTD1
DTYMK
DUS1L
DUSP10
DUSP14
DUSP4
DUSP6
DYNC1H1
DYNC1I2
DYNC1LI1
DYNLL1
DYNLL2
DYNLRB1
DYNLT1
DYRK2
E2F7
EAPP
EBNA1BP2
EBP
ECH1
ECHDC1
ECHS1
ECI2
ECT2
EDEM1
EDF1
EDIL3
EEF1A1
EEF1B2
EEF1D
EEF1E1
EEF1G
EEF2
EFCAB14
EFEMP1
EFTUD2
EGFR
EHD1
EHD4
EHF
EI24
EID1
EIF1
EIF2A
EIF2AK1
EIF2B2
EIF2B5
EIF2D
EIF2S1
EIF2S2
EIF2S3
EIF3B
EIF3D
EIF3E
EIF3F
EIF3G
EIF3H
EIF3I
EIF3K
EIF3L
EIF3M
EIF4A1
EIF4A2
EIF4A3
EIF4B
EIF4E
EIF4E2
EIF4G1
EIF4G2
EIF4H
EIF5
EIF5A
EIF6
ELAC2
ELAVL1
ELK1
ELL2
ELOF1
ELOVL1
ELOVL5
ELOVL6
ELP6
EMC3
EMC4
EMD
EMP1
EMP3
ENC1
ENO1
ENO2
ENPP1
ENSA
ENTPD6
ENY2
EPG5
EPHA2
EPN2
EPRS
EPS8L2
ERBB2IP
ERCC1
ERCC2
ERGIC1
ERGIC3
ERH
ERI1
ERLEC1
ERO1L
ERP29
ERRFI1
ESD
ESYT1
ESYT2
ETF1
ETFA
ETFB
ETHE1
ETS1
ETV1
EWSR1
EXOC2
EXOC5
EXOC7
EXOSC2
EXOSC3
EXOSC5
EXOSC7
EXOSC9
EXT1
EXT2
EXTL3
EZR
F2RL1
F3
FABP5
FADS1
FADS2
FADS3
FAF2
FAH
FAM103A1
FAM104B
FAM114A1
FAM120A
FAM127A
FAM127B
FAM129B
FAM131A
FAM134C
FAM136A
FAM168B
FAM192A
FAM195B
FAM20B
FAM213A
FAM220A
FAM32A
FAM3A
FAM3C
FAM46C
FAM49B
FAM50A
FAM60A
FAM64A
FAM91A1
FAM96A
FAM96B
FAR1
FASN
FAT1
FAU
FBL
FBXL5
FBXO18
FBXO28
FBXO32
FBXO34
FBXO7
FBXW11
FBXW2
FBXW5
FCF1
FCGRT
FDFT1
FDPS
FEN1
FERMT2
FGF5
FGFR1
FGFR1OP2
FH
FHL2
FIBP
FIS1
FKBP1A
FKBP2
FKBP3
FKBP4
FKBP8
FLII
FLNA
FLNB
FLOT1
FLOT2
FLYWCH2
FOS
FOSL2
FOXP1
FOXRED1
FRMD6
FST
FSTL1
FTH1
FTL
FTSJ1
FTSJD2
FUBP1
FUCA1
FUCA2
FUT8
FXR1
FXR2
FXYD5
FYN
FZD2
G0S2
G3BP1
G3BP2
G6PC3
GABARAP
GABARAPL2
GADD45A
GADD45B
GADD45GIP1
GALE
GALK1
GALNT1
GALNT10
GALNT2
GANAB
GAPDH
GAR1
GARS
GAS6
GATAD2A
GBE1
GBP1
GBP2
GBP3
GCNT2
GDI1
GDI2
GEM
GEMIN2
GEMIN7
GFPT1
GGNBP2
GHITM
GID8
GINS2
GIT2
GLO1
GLOD4
GLRX
GLRX2
GLRX3
GLT8D1
GLTP
GLTSCR2
GLUD1
GLUL
GMNN
GMPPA
GMPR2
GMPS
GNA11
GNA13
GNA15
GNAI2
GNAI3
GNAS
GNB1
GNB2
GNB2L1
GNB4
GNG10
GNG11
GNG12
GNG5
GNL2
GNL3
GNL3L
GNPDA1
GNS
GOLGA3
GOLGA4
GOLGA5
GOLGA7
GOLM1
GOLPH3
GOLPH3L
GORASP2
GPAA1
GPANK1
GPBP1
GPBP1L1
GPI
GPKOW
GPN1
GPN3
GPR108
GPR116
GPRC5A
GPSM2
GPSM3
GPX1
GPX3
GRAMD3
GRB2
GRHPR
GRK6
GRN
GRPEL1
GRSF1
GSDMD
GSN
GSPT1
GSS
GSTM3
GSTO1
GSTP1
GSTZ1
GTF2A2
GTF2B
GTF2E2
GTF2F1
GTF2F2
GTF2H3
GTF2H4
GTF2H5
GTF3A
GTF3C5
GTPBP2
GTPBP4
GTPBP5
GUCD1
GUK1
H1F0
H2AFJ
H2AFV
H2AFX
H2AFY
H2AFZ
H3F3A
H3F3B
HADH
HADHA
HADHB
HAGH
HARS
HAUS4
HAUS7
HAX1
HBEGF
HBS1L
HCCS
HCFC1R1
HDAC1
HDAC2
HDAC9
HDDC2
HDDC3
HDGF
HDLBP
HEBP1
HEMK1
HERPUD1
HEXA
HEXB
HEXIM1
HIAT1
HIBADH
HIF1A
HIGD1A
HIGD2A
HINT1
HIST1H1C
HIST1H1E
HIST1H2AB
HIST1H2AC
HIST1H2AG
HIST1H2AH
HIST1H2AK
HIST1H2AM
HIST1H2BB
HIST1H2BC
HIST1H2BD
HIST1H2BE
HIST1H2BJ
HIST1H2BK
HIST1H2BL
HIST1H2BN
HIST1H2BO
HIST1H3A
HIST1H3B
HIST1H3C
HIST1H3H
HIST1H3J
HIST1H4A
HIST1H4B
HIST1H4C
HIST1H4H
HIST2H2AB
HIST2H2AC
HIST2H2BE
HIST2H2BF
HIST2H3D
HIST4H4
HJURP
HLA-DRA
HLA-E
HLA-F
HM13
HMBS
HMG20B
HMGA1
HMGB1
HMGB2
HMGB3
HMGCR
HMGCS1
HMGN1
HMGN2
HMGN3
HMGN4
HMGXB3
HMGXB4
HMOX2
HN1
HN1L
HNRNPA0
HNRNPA1
HNRNPA2B1
HNRNPAB
HNRNPC
HNRNPD
HNRNPF
HNRNPH1
HNRNPK
HNRNPL
HNRNPR
HNRNPU
HNRNPUL1
HNRPDL
HOMER3
HP1BP3
HPCAL1
HPS1
HRAS
HSBP1
HSD17B10
HSD17B11
HSD17B12
HSD17B4
HSD3B7
HSDL2
HSF1
HSP90AA1
HSP90AB1
HSP90B1
HSPA13
HSPA4
HSPA5
HSPA8
HSPA9
HSPB1
HSPB11
HSPD1
HSPE1
HUWE1
HYI
HYLS1
HYOU1
IAH1
IARS
ICAM1
ICT1
IDH1
IDH3A
IDH3G
IDS
IER2
IER3
IER3IP1
IFI16
IFI27
IFI27L1
IFI27L2
IFIT1
IFIT3
IFIT5
IFITM1
IFITM2
IFITM3
IFNGR2
IFRD1
IFT20
IGBP1
IGFBP3
IGFBP4
IGFBP7
IGIP
IK
IL11
IL15RA
IL24
IL32
IL6
IL6ST
IL8
ILF2
ILF3
ILK
ILVBL
IMMT
IMPA1
IMPDH1
IMPDH2
INF2
INO80C
INPPL1
INSIG1
IPO5
IPO7
IPO9
IQGAP1
IQGAP3
IRAK1
IRAK2
IRF1
IRF3
IRS1
ISCA2
ISCU
ISG15
ISOC2
IST1
ITGA2
ITGA3
ITGAV
ITGB1
ITGB1BP1
ITGB5
ITM2B
ITM2C
ITPR3
IWS1
J01415.25
JAGN1
JKAMP
JOSD1
JTB
JUNB
KARS
KCMF1
KCTD20
KDELR1
KDELR2
KDELR3
KDM5C
KDSR
KEAP1
KHDRBS3
KHNYN
KIAA0020
KIAA0100
KIAA0101
KIAA0391
KIAA0907
KIAA1191
KIAA1199
KIAA1967
KIF1C
KIF20A
KIF22
KIF2C
KIF5B
KIFC1
KIFC3
KISS1
KLC1
KLF6
KLHDC2
KLHDC3
KLHL36
KLHL5
KPNA2
KPNA4
KPNB1
KRT18
KRT19
KRT7
KRT8
KTN1
KXD1
LAMB2
LAMB3
LAMC1
LAMP2
LAMTOR1
LAMTOR4
LARP4
LARP4B
LARP7
LAS1L
LASP1
LAYN
LBR
LDB1
LDHA
LDHB
LDLR
LEMD2
LEPRE1
LEPROT
LETM1
LGALS1
LGALS3
LGALS3BP
LGALS8
LIF
LIMA1
LIMCH1
LIN7C
LIPA
LITAF
LLPH
LMAN1
LMNA
LMNB1
LONP1
LOX
LOXL2
LPAR1
LPIN2
LRP10
LRPAP1
LRPPRC
LRRC20
LRRC41
LRRC59
LRRFIP1
LSM12
LSM14A
LSM14B
LSM2
LSM3
LSM4
LSM5
LSM6
LSM7
LSS
LTA4H
LTBR
LUC7L2
LUC7L3
LUZP1
LUZP6
LXN
LY6E
LYAR
LYPLA1
LYPLA2
LYPLAL1
LYRM4
LYSMD2
MACF1
MAD2L1
MAD2L1BP
MAD2L2
MAEA
MAF1
MAGED1
MAGED2
MAGT1
MAN1B1
MAN2A1
MANBAL
MANF
MAP1B
MAP2K1
MAP2K2
MAP3K3
MAP4
MAP4K4
MAP7D3
MAPK1
MAPK13
MAPK14
MAPK1IP1L
MAPK3
MAPK8
MAPK9
MAPKAP1
MAPKAPK2
MAPKAPK3
MAPRE1
MARCH2
MARCH5
MARCH7
MARK3
MARS
MAT2A
MAT2B
MATR3
MAX
MAZ
MBNL1
MBNL2
MBP
MBTPS1
MCAM
MCFD2
MCL1
MCM3
MCM7
MCMBP
MCRS1
MCTS1
MDH1
MDH2
MEA1
MEAF6
MECP2
MED10
MED11
MED17
MED20
MED22
MED8
MET
METAP2
METTL23
METTL3
METTL5
METTL9
MFAP1
MFAP3
MFI2
MFN2
MFSD12
MGAT1
MGAT2
MGAT4B
MGST1
MGST3
MICA
MICB
MID1IP1
MIER1
MIF
MIF4GD
MINA
MKLN1
MKNK2
MKRN1
MLF2
MLH1
MLPH
MLST8
MLX
MMADHC
MMP1
MMP14
MMS19
MNAT1
MND1
MOAP1
MOCS2
MOGS
MOK
MORC4
MORF4L1
MORF4L2
MOSPD1
MOSPD3
MPDU1
MPP1
MPP5
MPRIP
MPV17
MPZL1
MRFAP1
MRFAP1L1
MRP63
MRPL10
MRPL12
MRPL13
MRPL14
MRPL17
MRPL18
MRPL19
MRPL2
MRPL21
MRPL22
MRPL23
MRPL24
MRPL27
MRPL3
MRPL30
MRPL32
MRPL33
MRPL34
MRPL35
MRPL36
MRPL41
MRPL42
MRPL43
MRPL47
MRPL49
MRPL51
MRPL52
MRPL54
MRPL55
MRPL9
MRPS10
MRPS15
MRPS16
MRPS17
MRPS18B
MRPS21
MRPS22
MRPS23
MRPS24
MRPS30
MRPS33
MRPS35
MRPS36
MRPS5
MRPS6
MRPS7
MRS2
MRTO4
MSANTD3
MSH6
MSL1
MSMO1
MSN
MSRB3
MT-ATP6
MT-CO1
MT-CO2
MT-CO3
MT-CYB
MT-ND1
MT-ND2
MT-ND3
MT-ND4
MT-ND4L
MT-ND5
MT1E
MT1X
MT2A
MTA1
MTCH1
MTDH
MTHFD1
MTMR2
MTMR4
MTPN
MTRNR2L8
MTX3
MUT
MVB12A
MVP
MXD4
MXI1
MYC
MYEOV
MYH9
MYL12A
MYL12B
MYL6
MYL9
MYO1B
MYO1C
MYOF
NAA10
NAA15
NAA20
NAA38
NAA50
NAB1
NABP1
NACA
NACC1
NADK
NADSYN1
NAMPT
NANS
NAP1L1
NAPA
NARF
NARR
NARS
NASP
NBL1
NBR1
NCAPD2
NCAPG
NCBP2
NCEH1
NCKAP1
NCOA4
NCS1
NCSTN
NDFIP1
NDST1
NDUFA1
NDUFA10
NDUFA11
NDUFA12
NDUFA13
NDUFA2
NDUFA3
NDUFA4
NDUFA7
NDUFA8
NDUFAB1
NDUFAF2
NDUFAF3
NDUFB10
NDUFB11
NDUFB2
NDUFB3
NDUFB4
NDUFB6
NDUFB7
NDUFB8
NDUFC1
NDUFC2
NDUFS1
NDUFS2
NDUFS4
NDUFS5
NDUFS6
NDUFS7
NDUFS8
NDUFV1
NDUFV2
NECAP2
NEDD4L
NEDD8
NEDD9
NEK2
NEK6
NEK7
NELFB
NELFCD
NELFE
NET1
NEU1
NFE2L1
NFE2L2
NFE2L3
NFKBIA
NFKBIZ
NGDN
NGF
NGFRAP1
NGRN
NHP2
NHP2L1
NIPAL3
NIPSNAP1
NIPSNAP3A
NIT2
NKIRAS2
NMD3
NME1
NME1-NME2
NME2
NME6
NMT1
NNMT
NNT
NOC2L
NOL11
NOLC1
NONO
NOP10
NOP16
NOP56
NOSIP
NOTCH2NL
NPC1
NPC2
NPLOC4
NPM1
NPTN
NQO1
NQO2
NR1D2
NR1H2
NR2C2AP
NR3C1
NRAS
NRBF2
NRBP1
NRD1
NREP
NRP1
NRSN2
NSA2
NSMF
NT5C3B
NT5E
NTMT1
NUAK1
NUCB1
NUCB2
NUCKS1
NUDC
NUDCD1
NUDCD2
NUDCD3
NUDT21
NUDT3
NUDT4
NUDT5
NUF2
NUMA1
NUMB
NUP153
NUP205
NUP85
NUP98
NUPL1
NUS1
NUSAP1
NUTF2
NXN
NXT1
OARD1
OAT
OAZ1
OAZ2
OCIAD1
OCIAD2
ODC1
OGDH
OGFRL1
OGT
OLA1
OPA1
OPTN
ORAI2
ORMDL1
ORMDL2
ORMDL3
OSBPL3
OSBPL8
OSGEP
OST4
OSTC
OSTF1
OTUB1
OTUD4
OXSR1
P4HA2
P4HB
PA2G4
PABPC1
PABPC4
PACSIN2
PAFAH1B1
PAFAH1B2
PAFAH1B3
PAICS
PAIP1
PAIP2
PAK2
PAM
PANK3
PANX1
PAPOLA
PAPSS2
PARD3
PARK7
PARP1
PARP4
PBDC1
PBX2
PCBD1
PCBP1
PCBP2
PCBP4
PCMT1
PCNA
PCNP
PCYT2
PDAP1
PDCD10
PDCD4
PDCD5
PDCD6
PDCD6IP
PDCL3
PDE4D
PDE4DIP
PDE6D
PDGFA
PDHA1
PDHB
PDHX
PDIA3
PDIA4
PDIA6
PDLIM1
PDLIM5
PDP1
PDRG1
PDS5A
PDXK
PDZD11
PEA15
PEBP1
PEF1
PELO
PEPD
PERP
PES1
PET100
PEX19
PFDN1
PFDN2
PFDN4
PFDN5
PFDN6
PFKL
PFKM
PFKP
PFN1
PGAM1
PGK1
PGLS
PGM1
PGM2
PGM3
PGPEP1
PHAX
PHB
PHB2
PHC2
PHF1
PHF19
PHF20L1
PHF3
PHLDA1
PHPT1
PHYHD1
PI4KB
PICALM
PIGK
PIGY
PIH1D1
PIM1
PIN1
PINK1
PIP5K1A
PITPNA
PITPNC1
PITX1
PJA2
PKIG
PKM
PKN1
PKP4
PLA2G16
PLAC8
PLAT
PLAU
PLAUR
PLD3
PLEKHA1
PLEKHB2
PLGRKT
PLIN2
PLIN3
PLK2
PLP2
PLRG1
PLS3
PLXNA1
PMAIP1
PMF1
PMF1-BGLAP
PMM1
PMP22
PMPCB
PNKD
PNMA1
PNP
PNPLA6
PNRC2
POFUT1
POLD2
POLDIP2
POLDIP3
POLE3
POLR1C
POLR1D
POLR2B
POLR2C
POLR2E
POLR2F
POLR2G
POLR2H
POLR2I
POLR2J
POLR2K
POLR2L
POLR3H
POMGNT1
POMP
POP4
POP7
PPA1
PPA2
[truncated: 1,117 more rows]

## Sheet: B
	MDA-MB-231 Cellular Genes
	Current Background: Homo sapiens
	Category	Term	Count	%	PValue	Genes	List Total	Pop Hits	Pop Total	Fold Enrichment	Bonferroni	Benjamini	FDR
	GOTERM_BP_FAT	GO:0006412~translation	205	6.97991	6.6078e-72	RPL18, RPL17, MRPL42, MRPL41, RPL19, RPL14, RPL13, RPL15, RPLP2, RPL22L1, RPLP0, RPLP1, MRPL36, RPL26L1, RPL10, FAU, RPL11, RPL12, MRPL32, EIF2B2, MRPL33, MRPL34, EIF2B5, MRPL35, MRPL52, MRPL51, YARS, AARS, EIF2S3, RPS18, RPS19, RPS16, RPS14, RARS, EIF2S1, RPS15, EIF2S2, MRPL49, RPS12, HARS, RPS13, RPS10, PELO, MRPL47, RPS11, MRPL43, PABPC4, DTD1, RPS25, RPS26, RPS27, RPS28, RPS29, MRPL55, RPS20,…	2426	331	13528	3.45357	2.90611e-68	2.90611e-68	1.24052e-68
	GOTERM_BP_FAT	GO:0006414~translational elongation	87	2.96221	3.03218e-49	RPL18, RPL17, RPL36A, RPL19, RPL14, RPL13, RPL15, RPLP2, RPS2, RPS3, RPS3A, RPLP0, RPLP1, RPL26L1, RPL10, FAU, RPL11, RPL12, RPS27A, RPL35A, EEF2, RPS4X, RPS18, TRNAU1AP, RPS19, RPS16, RPL41, RPS14, RPS15, RPS12, EEF1G, RPS13, RPS10, RPS11, UBB, EEF1D, UBA52, TUFM, EEF1B2, RPL27A, RPL35, RPS15A, RPL36, RPL37, RPL38, RPL39, RPS25, RPS26, RPS27, RPL30, RPS28, RPL7, RPL32, RPS29, RPL31, RPL6, RPL34,…	2426	101	13528	4.80331	1.33355e-45	6.66776e-46	5.69247e-46
	GOTERM_BP_FAT	GO:0046907~intracellular transport	231	7.86517	3.06394e-27	SEC31A, CHMP5, TRAPPC2L, SSR1, BAK1, APP, HOMER3, RPL11, FTL, OPA1, KIF5B, RAN, VTI1B, OPTN, MYH9, ERGIC1, UXT, MAPK1, NPC1, NPC2, KRT18, SCYL1, ATP2C1, TXNDC5, RPS15, TRAPPC4, SRP72, TRAPPC1, TRAPPC3, TMX1, MTX3, RER1, NFKBIA, BCL2L1, RFFL, CALR, CDC37, CD74, MACF1, TMED10, STX10, TRAM1, MAP2K1, HNRNPA1, ARF1, ATP2A2, MLX, PCNA, BET1L, NUTF2, PDIA3, TIMM17A, AP2S1, TIMM17B, BNIP3, COPB2, AP1S1, …	2426	657	13528	1.9606	1.34752e-23	4.49174e-24	5.75211e-24
	GOTERM_BP_FAT	GO:0031145~anaphase-promoting complex-dependent proteasomal ubiquitin-dependent protein catabolic process	52	1.77051	2.21276e-26	PSMD1, PSMD2, PSMD3, PSMD4, PSMD6, PSMD7, RPS27A, PSMD9, CDK1, ANAPC5, UBE2C, PSMA2, PSMA1, MAD2L1, PSMA6, PSME1, PSMA5, PSME2, PSMA4, PSMA3, PSME3, UBB, UBA52, ANAPC10, ANAPC11, PSMA7, PSMB5, PSMF1, PSMB4, PSMB7, PSMB6, PSMB1, PSMB3, PSMB2, BUB3, CDC20, CDC26, PSMB8, PSMB9, CCNB1, PSMC6, PSMD14, PSMD13, PSMC5, PSMD12, PSMC4, PSMC3, PSMD11, PSMD10, PSMC2, PSMC1, UBE2E1	2426	65	13528	4.46101	9.73174e-23	1.94635e-23	4.15414e-23
	GOTERM_BP_FAT	GO:0000278~mitotic cell cycle	153	5.2094	2.76851e-26	KIFC1, SEPT2, PRC1, AURKA, AURKB, PTTG1, CD2AP, APP, RAD21, CDKN2C, CDKN2D, CCNA2, CDCA5, STAG2, RPS27A, CDCA3, EGFR, ANAPC5, RAN, PIM1, TBRG4, SKP1, PPP1CB, WEE1, DCTN1, NCAPD2, DCTN2, PSMA2, PSMA1, MAD2L1, PSMA6, SPAG5, PSMA5, ZWINT, PSMA4, PSMA3, CLIP1, STMN1, MAD2L2, SEPT7, UBA52, NEK6, NEK2, ANAPC13, NEDD9, ANAPC10, ANLN, ANAPC11, CDC34, PSMA7, RCC1, CCNG1, ITGB1, PSMB5, SPC24, PSMB4, PSMB7,…	2426	370	13528	2.30586	1.21759e-22	2.02932e-23	5.19748e-23
	GOTERM_BP_FAT	GO:0006091~generation of precursor metabolites and energy	137	4.66462	1.94849e-26	LDHB, LDHA, GNPDA1, IL6ST, ATP6AP1, NDUFAB1, PGAM1, OGDH, PDHB, UQCR10, IDH3G, UQCR11, PDHA1, TXNL1, SUCLG2, PPP1CC, PPP1CB, COX6C, NNT, PGM1, DLD, ATP5C1, ATPIF1, MDH2, MDH1, ALDOA, TMX1, ENPP1, TXN2, COX7C, ATP6V1B2, ATP6V0B, TPI1, PPP1R3B, IDH1, ERO1L, FH, COX8A, DLAT, CYB561, IDH3A, UQCRHL, GBE1, NDUFV1, NDUFV2, COX6A1, UQCRC2, ATP5E, PPARD, ATP6V0E1, UQCRC1, ATP5B, UQCRFS1, UQCRQ, NDUFS7, AK…	2426	313	13528	2.44073	8.56947e-23	2.14237e-23	3.65801e-23
	GOTERM_BP_FAT	GO:0010498~proteasomal protein catabolic process	67	2.28124	1.17753e-25	PPP2R5C, CD2AP, ERLEC1, PSMD1, PSMD2, PSMD3, PSMD4, PSMD6, PSMD7, RPS27A, PSMD9, TBL1XR1, CDK1, ANAPC5, UBE2C, PSMA2, PSMA1, MAD2L1, SEC61B, PSMA6, PSME1, PSMA5, PSME2, PSMA4, PSMA3, PSME3, UBB, UBA52, RAD23B, DERL2, RAD23A, ANAPC10, ANAPC11, PSMA7, STUB1, EDEM1, PSMB5, PSMB4, PSMF1, PSMB7, PSMB6, PSMB1, PSMB3, PPP2CB, PSMB2, BUB3, NPLOC4, CDC20, PCNP, CDC26, PSMB8, PSMB9, CCNB1, HSP90B1, PSMC6, …	2426	102	13528	3.66284	5.17878e-22	7.39825e-23	2.21064e-22
	GOTERM_BP_FAT	GO:0043161~proteasomal ubiquitin-dependent protein catabolic process	67	2.28124	1.17753e-25	PPP2R5C, CD2AP, ERLEC1, PSMD1, PSMD2, PSMD3, PSMD4, PSMD6, PSMD7, RPS27A, PSMD9, TBL1XR1, CDK1, ANAPC5, UBE2C, PSMA2, PSMA1, MAD2L1, SEC61B, PSMA6, PSME1, PSMA5, PSME2, PSMA4, PSMA3, PSME3, UBB, UBA52, RAD23B, DERL2, RAD23A, ANAPC10, ANAPC11, PSMA7, STUB1, EDEM1, PSMB5, PSMB4, PSMF1, PSMB7, PSMB6, PSMB1, PSMB3, PPP2CB, PSMB2, BUB3, NPLOC4, CDC20, PCNP, CDC26, PSMB8, PSMB9, CCNB1, HSP90B1, PSMC6, …	2426	102	13528	3.66284	5.17878e-22	7.39825e-23	2.21064e-22
	GOTERM_BP_FAT	GO:0051443~positive regulation of ubiquitin-protein ligase activity	53	1.80456	6.83129e-25	PSMD1, PSMD2, PSMD3, PSMD4, PSMD6, PSMD7, RPS27A, PSMD9, CDK1, ANAPC5, SKP1, UBE2C, UBE2N, PSMA2, PSMA1, PSMA6, PSME1, PSMA5, PSME2, PSMA4, PSMA3, PSME3, UBB, UBA52, ANAPC10, ANAPC11, PSMA7, PIN1, PSMB5, PSMF1, PSMB4, PSMB7, PSMB6, PSMB1, PSMB3, PSMB2, CDC20, CDC26, PSMB8, PSMB9, CCNB1, PSMC6, PSMD14, PSMD13, PSMC5, PSMD12, PSMC4, PSMC3, PSMD11, PSMD10, PSMC2, PSMC1, UBE2E1	2426	70	13528	4.22202	3.0044e-21	3.7555e-22	1.28247e-21
	GOTERM_BP_FAT	GO:0007049~cell cycle	254	8.64828	1.02778e-24	KIFC1, S100A6, MRPL41, AURKA, AURKB, PTTG1, CD2AP, CTNNB1, APP, ILK, H2AFX, SUPT5H, CCNA2, CDCA5, STAG2, CDCA3, ANAPC5, RAN, PIM1, TBRG4, HMG20B, UBR2, SKP1, MYH9, DCTN1, DCTN2, NCAPD2, MAPK1, KRT18, MAD2L1, SPAG5, ZWINT, MAPK3, PELO, MAD2L2, MCTS1, NEK6, NEK2, CDC34, RCC1, CALR, PIN1, MACF1, CDC123, SKA2, NUDC, SSSCA1, MAP2K1, NUF2, SMAD3, PCNP, CDC20, PMF1, CDC26, SEPT10, SEPT11, RNF8, NOLC1, U…	2426	776	13528	1.82522	4.52016e-21	5.0224e-22	1.9295e-21
	GOTERM_BP_FAT	GO:0051438~regulation of ubiquitin-protein ligase activity	56	1.90671	2.1116e-24	PSMD1, PSMD2, PSMD3, PSMD4, PSMD6, PSMD7, RPS27A, PSMD9, CDK1, ANAPC5, SKP1, UBE2C, UBE2N, PSMA2, PSMA1, MAD2L1, PSMA6, PSME1, PSMA5, PSME2, PSMA4, PSMA3, PSME3, UBB, ZER1, UBA52, ANAPC10, ANAPC11, PSMA7, PIN1, PSMB5, PSMB4, PSMF1, PSMB7, PSMB6, PSMB1, PSMB3, PSMB2, BUB3, CDC20, CDC26, PSMB8, PSMB9, CCNB1, PSMC6, PSMD14, PSMD13, PSMC5, PSMD12, PSMC4, PSMC3, PSMD11, PSMD10, PSMC2, PSMC1, UBE2E1	2426	78	13528	4.00347	9.28684e-21	8.44258e-22	3.96423e-21
	GOTERM_BP_FAT	GO:0051439~regulation of ubiquitin-protein ligase activity during mitotic cell cycle	53	1.80456	2.10263e-24	PSMD1, PSMD2, PSMD3, PSMD4, PSMD6, PSMD7, RPS27A, PSMD9, CDK1, ANAPC5, SKP1, UBE2C, PSMA2, PSMA1, MAD2L1, PSMA6, PSME1, PSMA5, PSME2, PSMA4, PSMA3, PSME3, UBB, UBA52, ANAPC10, ANAPC11, PSMA7, PSMB5, PSMB4, PSMF1, PSMB7, PSMB6, PSMB1, PSMB3, PSMB2, BUB3, CDC20, CDC26, PSMB8, PSMB9, CCNB1, PSMC6, PSMD14, PSMD13, PSMC5, PSMD12, PSMC4, PSMC3, PSMD11, PSMD10, PSMC2, PSMC1, UBE2E1	2426	71	13528	4.16256	9.24736e-21	9.24736e-22	3.94738e-21
	GOTERM_BP_FAT	GO:0051436~negative regulation of ubiquitin-protein ligase activity during mitotic cell cycle	50	1.70242	5.12271e-24	PSMD1, PSMD2, PSMD3, PSMD4, PSMD6, PSMD7, RPS27A, PSMD9, ANAPC5, UBE2C, PSMA2, PSMA1, MAD2L1, PSMA6, PSME1, PSMA5, PSME2, PSMA4, PSMA3, PSME3, UBB, UBA52, ANAPC10, ANAPC11, PSMA7, PSMB5, PSMF1, PSMB4, PSMB7, PSMB6, PSMB1, PSMB3, PSMB2, BUB3, CDC20, CDC26, PSMB8, PSMB9, PSMC6, PSMD14, PSMD13, PSMC5, PSMD12, PSMC4, PSMC3, PSMD11, PSMD10, PSMC2, PSMC1, UBE2E1	2426	65	13528	4.28943	2.25297e-20	1.87747e-21	9.61714e-21
	GOTERM_BP_FAT	GO:0051437~positive regulation of ubiquitin-protein ligase activity during mitotic cell cycle	51	1.73647	1.20515e-23	PSMD1, PSMD2, PSMD3, PSMD4, PSMD6, PSMD7, RPS27A, PSMD9, CDK1, ANAPC5, SKP1, UBE2C, PSMA2, PSMA1, PSMA6, PSME1, PSMA5, PSME2, PSMA4, PSMA3, PSME3, UBB, UBA52, ANAPC10, ANAPC11, PSMA7, PSMB5, PSMF1, PSMB4, PSMB7, PSMB6, PSMB1, PSMB3, PSMB2, CDC20, CDC26, PSMB8, PSMB9, CCNB1, PSMC6, PSMD14, PSMD13, PSMC5, PSMD12, PSMC4, PSMC3, PSMD11, PSMD10, PSMC2, PSMC1, UBE2E1	2426	68	13528	4.18219	5.30027e-20	4.07713e-21	2.2625e-20
	GOTERM_BP_FAT	GO:0051351~positive regulation of ligase activity	53	1.80456	1.78508e-23	PSMD1, PSMD2, PSMD3, PSMD4, PSMD6, PSMD7, RPS27A, PSMD9, CDK1, ANAPC5, SKP1, UBE2C, UBE2N, PSMA2, PSMA1, PSMA6, PSME1, PSMA5, PSME2, PSMA4, PSMA3, PSME3, UBB, UBA52, ANAPC10, ANAPC11, PSMA7, PIN1, PSMB5, PSMF1, PSMB4, PSMB7, PSMB6, PSMB1, PSMB3, PSMB2, CDC20, CDC26, PSMB8, PSMB9, CCNB1, PSMC6, PSMD14, PSMD13, PSMC5, PSMD12, PSMC4, PSMC3, PSMD11, PSMD10, PSMC2, PSMC1, UBE2E1	2426	73	13528	4.04852	7.85079e-20	5.60771e-21	3.35123e-20
	GOTERM_BP_FAT	GO:0051340~regulation of ligase activity	56	1.90671	3.87366e-23	PSMD1, PSMD2, PSMD3, PSMD4, PSMD6, PSMD7, RPS27A, PSMD9, CDK1, ANAPC5, SKP1, UBE2C, UBE2N, PSMA2, PSMA1, MAD2L1, PSMA6, PSME1, PSMA5, PSME2, PSMA4, PSMA3, PSME3, UBB, ZER1, UBA52, ANAPC10, ANAPC11, PSMA7, PIN1, PSMB5, PSMB4, PSMF1, PSMB7, PSMB6, PSMB1, PSMB3, PSMB2, BUB3, CDC20, CDC26, PSMB8, PSMB9, CCNB1, PSMC6, PSMD14, PSMD13, PSMC5, PSMD12, PSMC4, PSMC3, PSMD11, PSMD10, PSMC2, PSMC1, UBE2E1	2426	81	13528	3.85519	1.70364e-19	1.13576e-20	7.27224e-20
	GOTERM_BP_FAT	GO:0006396~RNA processing	193	6.57133	5.24803e-23	RPL14, U2AF2, LSM6, LSM7, NONO, DDX17, APP, RBM8A, LSM5, U2AF1, LSM4, LSM3, RPL11, LSM2, LUC7L3, RPP21, SF3B14, AARS, RPS19, RPS16, RPS14, RPS15, CPSF3L, HSD17B10, NHP2L1, PABPC4, ZCRB1, TRPT1, NAA38, RPS28, WDR55, PABPC1, SNRNP35, RPS24, PRPF40A, UTP23, DHX9, DDX1, SMAD3, DDX5, RPS6, NOP10, HNRNPA1, RPF1, HNRNPA0, RPS7, NOLC1, POP4, SNRNP27, SNRNP25, POP7, ADAR, GAR1, CWC15, MLH1, YBX1, WDR36, Q…	2426	547	13528	1.96749	2.30809e-19	1.3577e-20	9.85242e-20
	GOTERM_BP_FAT	GO:0051444~negative regulation of ubiquitin-protein ligase activity	50	1.70242	5.02036e-23	PSMD1, PSMD2, PSMD3, PSMD4, PSMD6, PSMD7, RPS27A, PSMD9, ANAPC5, UBE2C, PSMA2, PSMA1, MAD2L1, PSMA6, PSME1, PSMA5, PSME2, PSMA4, PSMA3, PSME3, UBB, UBA52, ANAPC10, ANAPC11, PSMA7, PSMB5, PSMF1, PSMB4, PSMB7, PSMB6, PSMB1, PSMB3, PSMB2, BUB3, CDC20, CDC26, PSMB8, PSMB9, PSMC6, PSMD14, PSMD13, PSMC5, PSMD12, PSMC4, PSMC3, PSMD11, PSMD10, PSMC2, PSMC1, UBE2E1	2426	67	13528	4.16139	2.20795e-19	1.37997e-20	9.42499e-20
	GOTERM_BP_FAT	GO:0051352~negative regulation of ligase activity	50	1.70242	5.02036e-23	PSMD1, PSMD2, PSMD3, PSMD4, PSMD6, PSMD7, RPS27A, PSMD9, ANAPC5, UBE2C, PSMA2, PSMA1, MAD2L1, PSMA6, PSME1, PSMA5, PSME2, PSMA4, PSMA3, PSME3, UBB, UBA52, ANAPC10, ANAPC11, PSMA7, PSMB5, PSMF1, PSMB4, PSMB7, PSMB6, PSMB1, PSMB3, PSMB2, BUB3, CDC20, CDC26, PSMB8, PSMB9, PSMC6, PSMD14, PSMD13, PSMC5, PSMD12, PSMC4, PSMC3, PSMD11, PSMD10, PSMC2, PSMC1, UBE2E1	2426	67	13528	4.16139	2.20795e-19	1.37997e-20	9.42499e-20
	GOTERM_BP_FAT	GO:0031398~positive regulation of protein ubiquitination	57	1.94076	6.25687e-23	PSMD1, PSMD2, PSMD3, PSMD4, PSMD6, PSMD7, RPS27A, PSMD9, BCL10, CDK1, ANAPC5, SKP1, UBE2C, UBE2N, PSMA2, PSMA1, PSMA6, PSME1, PSMA5, PSME2, PSMA4, PSMA3, PSME3, UBB, UBA52, FKBP1A, ANAPC10, ANAPC11, PSMA7, STUB1, PIN1, PSMB5, PSMB4, PSMF1, PSMB7, PSMB6, PSMB1, PSMB3, PSMB2, NDFIP1, CDC20, CDC26, PSMB8, PSMB9, CCNB1, PSMC6, PSMD14, PSMD13, PSMC5, PSMD12, PSMC4, PSMC3, PSMD11, PSMD10, PSMC2, PSMC1,…	2426	84	13528	3.78389	2.75177e-19	1.52876e-20	1.17464e-19
	GOTERM_BP_FAT	GO:0045184~establishment of protein localization	246	8.37589	2.06138e-22	SEC31A, CHMP5, RAB1B, RAB1A, SSR1, HOMER3, RAB24, RPL11, RAN, VTI1B, OPTN, MYH9, YIF1A, MAPK1, KRT18, RAB18, RAB12, SRP72, RAB10, MTX3, NFKBIA, ARF6, PPT1, ARF5, RFFL, CHCHD4, CALR, CD74, CDC37, TRAM2, MACF1, TMED10, STX10, TRAM1, ARF1, RABEP1, ARF3, ARF4, PCNA, BET1L, NUTF2, RAB5B, PDIA3, RAB5C, TSG101, TIMM17A, AP2S1, TIMM17B, PPARG, PDIA4, CANX, COPB2, AP1S1, AP2B1, BLZF1, SEH1L, SRPR, COPB1, …	2426	769	13528	1.78382	9.06596e-19	4.77156e-20	3.86995e-19
	GOTERM_BP_FAT	GO:0015031~protein transport	244	8.3078	2.69642e-22	SEC31A, CHMP5, RAB1B, RAB1A, SSR1, HOMER3, RAB24, RPL11, RAN, VTI1B, OPTN, MYH9, YIF1A, MAPK1, KRT18, RAB18, RAB12, SRP72, RAB10, MTX3, NFKBIA, ARF6, PPT1, ARF5, RFFL, CHCHD4, CALR, CD74, CDC37, TRAM2, MACF1, TMED10, STX10, TRAM1, ARF1, RABEP1, ARF3, ARF4, PCNA, BET1L, NUTF2, RAB5B, PDIA3, RAB5C, TSG101, TIMM17A, AP2S1, TIMM17B, PPARG, PDIA4, CANX, COPB2, AP1S1, AP2B1, BLZF1, SEH1L, SRPR, COPB1, …	2426	762	13528	1.78557	1.18589e-18	5.92944e-20	5.06214e-19
	GOTERM_BP_FAT	GO:0000375~RNA splicing, via transesterification reactions	81	2.75792	3.25222e-22	NCBP2, RPL36A, SNRPD3, U2AF2, LSM7, CWC15, RBM5, SNRPD1, SNRPD2, YBX1, RBM8A, PCBP1, PRMT5, DNAJC8, PCBP2, U2AF1, LSM2, PRPF31, SNRPA1, SF3B14, SNUPN, EFTUD2, HNRNPA2B1, MBNL1, HNRNPR, HNRNPU, PRPF6, SNRNP200, SNRPB, SNRPA, SLU7, CELF1, SNRNP40, SNRPC, SNRPF, SNRPE, CPSF2, SNRPG, POLR2H, POLR2G, POLR2F, POLR2E, POLR2L, NHP2L1, POLR2K, TRA2B, POLR2J, POLR2I, TRA2A, SF3B5, POLR2C, NAA38, POLR2B, SF…	2426	153	13528	2.95214	1.43032e-18	6.50147e-20	6.10556e-19
	GOTERM_BP_FAT	GO:0000398~nuclear mRNA splicing, via spliceosome	81	2.75792	3.25222e-22	NCBP2, RPL36A, SNRPD3, U2AF2, LSM7, CWC15, RBM5, SNRPD1, SNRPD2, YBX1, RBM8A, PCBP1, PRMT5, DNAJC8, PCBP2, U2AF1, LSM2, PRPF31, SNRPA1, SF3B14, SNUPN, EFTUD2, HNRNPA2B1, MBNL1, HNRNPR, HNRNPU, PRPF6, SNRNP200, SNRPB, SNRPA, SLU7, CELF1, SNRNP40, SNRPC, SNRPF, SNRPE, CPSF2, SNRPG, POLR2H, POLR2G, POLR2F, POLR2E, POLR2L, NHP2L1, POLR2K, TRA2B, POLR2J, POLR2I, TRA2A, SF3B5, POLR2C, NAA38, POLR2B, SF…	2426	153	13528	2.95214	1.43032e-18	6.50147e-20	6.10556e-19
	GOTERM_BP_FAT	GO:0000377~RNA splicing, via transesterification reactions with bulged adenosine as nucleophile	81	2.75792	3.25222e-22	NCBP2, RPL36A, SNRPD3, U2AF2, LSM7, CWC15, RBM5, SNRPD1, SNRPD2, YBX1, RBM8A, PCBP1, PRMT5, DNAJC8, PCBP2, U2AF1, LSM2, PRPF31, SNRPA1, SF3B14, SNUPN, EFTUD2, HNRNPA2B1, MBNL1, HNRNPR, HNRNPU, PRPF6, SNRNP200, SNRPB, SNRPA, SLU7, CELF1, SNRNP40, SNRPC, SNRPF, SNRPE, CPSF2, SNRPG, POLR2H, POLR2G, POLR2F, POLR2E, POLR2L, NHP2L1, POLR2K, TRA2B, POLR2J, POLR2I, TRA2A, SF3B5, POLR2C, NAA38, POLR2B, SF…	2426	153	13528	2.95214	1.43032e-18	6.50147e-20	6.10556e-19
	GOTERM_BP_FAT	GO:0008380~RNA splicing	121	4.11985	3.21578e-22	NCBP2, RALY, RPL36A, PRPF4B, U2AF2, LSM6, SNRPD3, LSM7, RBM4, RBM5, SNRPD1, SNRPD2, NONO, RBM8A, DNAJC8, U2AF1, LSM5, LSM4, LSM3, LSM2, LUC7L3, SNRPA1, SF3B14, EFTUD2, HNRNPA2B1, HNRNPR, HNRNPU, SNRPB, SNRPA, SLU7, CELF1, SNRPC, SNRPF, SNRPE, SNRPG, NHP2L1, STRAP, PPIL1, ZCRB1, TRPT1, NAA38, HNRNPL, DDX46, HNRNPK, HNRNPF, HNRNPD, HNRNPC, SNRNP35, PABPC1, DDX41, PRPF40A, DHX9, DDX1, SNW1, RNPS1, D…	2426	284	13528	2.3758	1.4143e-18	6.73477e-20	6.03717e-19
	GOTERM_BP_FAT	GO:0008104~protein localization	272	9.26115	3.55107e-22	SEC31A, CHMP5, RAB1B, AURKB, MXI1, RAB1A, CTNNB1, SSR1, HOMER3, RAB24, RPL11, RAN, VTI1B, OPTN, MYH9, YIF1A, MAPK1, KRT18, RAB18, RAB12, SRP72, RAB10, MTX3, NFKBIA, ARF6, PPT1, CHCHD4, ARF5, RFFL, CALR, CD74, CDC37, TRAM2, MACF1, TMED10, SUPT7L, STX10, TRAM1, ARF1, RABEP1, ARF3, ARF4, PCNA, BET1L, NUTF2, RAB5B, PDIA3, RAB5C, TSG101, TIMM17A, AP2S1, TIMM17B, PPARG, PDIA4, CANX, COPB2, AP2B1, BLZF1…	2426	882	13528	1.71966	1.56176e-18	6.79026e-20	6.66661e-19
	GOTERM_BP_FAT	GO:0031397~negative regulation of protein ubiquitination	52	1.77051	5.21886e-22	PSMD1, PSMD2, PSMD3, PSMD4, PSMD6, PSMD7, RPS27A, PSMD9, GTPBP4, ANAPC5, UBE2C, PSMA2, PSMA1, MAD2L1, PSMA6, PSME1, PSMA5, PSME2, PSMA4, PSMA3, PSME3, UBB, UBA52, ANAPC10, ANAPC11, PSMA7, PSMB5, PSMF1, PSMB4, PSMB7, PSMB6, PSMB1, PSMB3, PSMB2, BUB3, CDC20, CDC26, PSMB8, PSMB9, PSMC6, PSMD14, PSMD13, PSMC5, PSMD12, PSMC4, PSMC3, PSMD11, PSMD10, PSMC2, PSMC1, VPS28, UBE2E1	2426	74	13528	3.91845	2.29525e-18	9.56356e-20	9.79764e-19
	GOTERM_BP_FAT	GO:0031396~regulation of protein ubiquitination	62	2.111	7.42905e-22	PSMD1, PSMD2, PSMD3, PSMD4, PSMD6, PSMD7, RPS27A, PSMD9, BCL10, CDK1, GTPBP4, ANAPC5, SKP1, UBE2C, UBE2N, PSMA2, PSMA1, MAD2L1, PSMA6, PSME1, PSMA5, PSME2, PSMA4, PSMA3, PSME3, UBB, ZER1, UBA52, ANAPC10, FKBP1A, ANAPC11, PSMA7, STUB1, PIN1, PSMB5, PSMB4, PSMF1, PSMB7, PSMB6, PSMB1, PSMB3, PSMB2, BUB3, NDFIP1, CDC20, CDC26, PSMB8, PSMB9, CCNB1, PSMC6, PSMD14, PSMC5, PSMD13, PSMD12, PSMC4, PSMC3, P…	2426	100	13528	3.45728	3.2673e-18	1.30692e-19	1.3947e-18
	GOTERM_BP_FAT	GO:0022402~cell cycle process	193	6.57133	3.56084e-21	KIFC1, AURKA, PTTG1, AURKB, CD2AP, CTNNB1, APP, ILK, H2AFX, CCNA2, CDCA5, STAG2, CDCA3, ANAPC5, RAN, PIM1, TBRG4, UBR2, SKP1, MYH9, DCTN1, NCAPD2, DCTN2, MAD2L1, SPAG5, ZWINT, MAD2L2, NEK6, NEK2, CDC34, CALR, RCC1, MACF1, CDC123, SKA2, NUDC, SSSCA1, MAP2K1, NUF2, SMAD3, CDC20, PMF1, CDC26, RNF8, NOLC1, TSG101, MLH1, DAXX, SEH1L, DYNC1H1, MYC, TUBB3, DHCR24, DSN1, TP53, TPX2, KLHDC3, CHMP1A, CCND1…	2426	565	13528	1.90481	1.56606e-17	6.0233e-19	6.68496e-18
	GOTERM_BP_FAT	GO:0065003~macromolecular complex assembly	216	7.35444	1.319e-20	HRAS, CD2AP, CTNNB1, HIST1H2BO, HIST1H2BN, PICALM, H2AFV, HIST1H2BK, HIST1H2BL, ILK, HIST1H2BJ, VMA21, H2AFZ, H2AFY, H2AFX, H1F0, PCBD1, H2AFJ, CD40, SPAG9, PTRF, RPS14, MED17, RPS15, ATPIF1, LAMC1, HSD17B10, CALR, CD74, RAC1, MAP2K1, DDX1, SMAD3, EPRS, SEPT11, UQCRHL, H3F3A, H3F3B, COX11, AP2S1, NAP1L1, MLH1, EIF2A, HIST2H2AB, LONP1, HIST2H2AC, GPX3, TUBB6, MYC, TUBB3, PRPF31, HIST1H1E, STX4, HI…	2426	665	13528	1.81124	5.80096e-17	2.1485e-18	2.47623e-17
	GOTERM_BP_FAT	GO:0031400~negative regulation of protein modification process	67	2.28124	2.21997e-20	BAK1, PSMD1, PSMD2, PSMD3, PSMD4, PSMD6, PSMD7, RPS27A, PSMD9, PPP2R1A, GTPBP4, ANAPC5, UBE2C, PRKCD, PSMA2, PSMA1, MAD2L1, PSMA6, PSME1, PSMA5, PSME2, PSMA4, PSMA3, PEBP1, PSME3, UBB, UBA52, CAV1, ENPP1, ANAPC10, FKBP1A, ANAPC11, PSMA7, PSMB5, PSMB4, PSMF1, PSMB7, SET, PSMB6, PSMB1, PSMB3, PPP2CA, PSMB2, BUB3, TAF7, YWHAB, CDC20, CDC26, YWHAE, PSMB8, PSMB9, PSMC6, PSMD14, PSMC5, PSMD13, PSMD12, …	2426	119	13528	3.13957	9.76343e-17	3.48694e-18	4.16767e-17
	GOTERM_BP_FAT	GO:0006397~mRNA processing	127	4.32414	5.42387e-20	RALY, NCBP2, RPL36A, PRPF4B, U2AF2, LSM6, SNRPD3, LSM7, RBM4, RBM5, SNRPD1, SNRPD2, NONO, APP, RBM8A, DNAJC8, U2AF1, LSM5, LSM4, LSM3, LSM2, LUC7L3, SNRPA1, SF3B14, EFTUD2, HNRNPA2B1, HNRNPR, HNRNPU, SNRPB, SNRPA, SLU7, CELF1, SNRPC, SNRPF, SNRPE, SNRPG, NHP2L1, STRAP, PPIL1, ZCRB1, NAA38, HNRNPL, DDX46, HNRNPK, HNRNPF, HNRNPD, HNRNPC, SNRNP35, PABPC1, DDX41, PRPF40A, DHX9, DDX1, SNW1, RNPS1, DDX…	2426	321	13528	2.20618	2.38542e-16	8.22559e-18	1.01825e-16
	GOTERM_BP_FAT	GO:0043933~macromolecular complex subunit organization	225	7.66088	5.67274e-20	HRAS, CD2AP, CTNNB1, HIST1H2BO, HIST1H2BN, PICALM, H2AFV, HIST1H2BK, HIST1H2BL, ILK, HIST1H2BJ, VMA21, H2AFZ, H2AFY, H2AFX, H1F0, PCBD1, H2AFJ, CD40, SPAG9, PTRF, RPS14, MED17, RPS15, ATPIF1, LAMC1, HSD17B10, CALR, CD74, RAC1, MAP2K1, DDX1, SMAD3, EPRS, SEPT11, UQCRHL, SUPT16H, H3F3A, H3F3B, COX11, AP2S1, NAP1L1, MLH1, EIF2A, HIST2H2AB, LONP1, SEH1L, HIST2H2AC, GPX3, TUBB6, MYC, TUBB3, PRPF31, HI…	2426	710	13528	1.76712	2.49487e-16	8.31623e-18	1.06497e-16
	GOTERM_BP_FAT	GO:0016071~mRNA metabolic process	140	4.76677	6.63586e-20	RALY, NCBP2, RPL36A, PRPF4B, U2AF2, LSM6, SNRPD3, LSM7, RBM4, RBM5, SNRPD1, SNRPD2, NONO, APP, DNAJB11, RBM8A, DNAJC8, U2AF1, LSM5, LSM4, LSM3, LSM2, LUC7L3, SNRPA1, SF3B14, EFTUD2, HNRNPA2B1, HNRNPR, HNRNPU, SERBP1, VEGFA, SNRPB, SNRPA, SLU7, CELF1, SNRPC, SNRPF, SNRPE, SNRPG, STRAP, NHP2L1, PPIL1, ZCRB1, MAPKAPK2, NAA38, HNRNPL, DDX46, HNRNPK, HNRNPF, EIF3E, HNRNPD, HNRNPC, PABPC1, SNRNP35, DDX…	2426	370	13528	2.10994	2.91845e-16	9.41436e-18	1.24579e-16
	GOTERM_BP_FAT	GO:0006886~intracellular protein transport	139	4.73272	5.60647e-19	SRP14, XPO1, TSPO, GRPEL1, XPO6, XPO5, ATP6AP1, EIF5A, AIP, TGFB2, SSR1, HOMER3, TIMM9, RPL11, SAR1B, SAR1A, RAN, ERP29, VTI1B, OPTN, BCAP31, MAPK1, KRT18, SEC61B, RPAIN, USO1, SDCBP, SRP72, SEC61G, ARL6IP1, SNX9, DERL2, ARFGAP3, STX7, SNX6, MTX3, COPZ1, SNX2, NFKBIA, NAPA, RFFL, CALR, CDC37, CD74, TOMM7, MACF1, CSE1L, TOMM5, NPM1, STX10, TRAM1, SEC61A1, AP2M1, SNAPIN, PPIH, VCP, PCNA, PTTG1IP, S…	2426	374	13528	2.07246	2.46573e-15	7.7054e-17	1.05253e-15
	GOTERM_BP_FAT	GO:0070727~cellular macromolecule localization	149	5.0732	8.32764e-19	SRP14, XPO1, GRPEL1, TSPO, XPO6, XPO5, ATP6AP1, EIF5A, AURKB, AIP, TGFB2, SSR1, CTNNB1, HOMER3, TIMM9, RPL11, SAR1B, SAR1A, EGFR, RAN, ERP29, VTI1B, OPTN, BCAP31, MAPK1, KRT18, SEC61B, RPAIN, USO1, SDCBP, SRP72, SEC61G, ARL6IP1, SNX9, DERL2, ARFGAP3, STX7, SNX6, MTX3, COPZ1, SNX2, NFKBIA, NAPA, RFFL, CALR, CD74, CDC37, TOMM7, MACF1, CSE1L, TOMM5, NPM1, SUPT7L, STX10, TRAM1, SRGN, SEC61A1, AP2M1, …	2426	414	13528	2.00691	3.6625e-15	1.10985e-16	1.56339e-15
	GOTERM_BP_FAT	GO:0034613~cellular protein localization	148	5.03916	1.03986e-18	SRP14, XPO1, TSPO, GRPEL1, XPO6, XPO5, ATP6AP1, EIF5A, AURKB, AIP, TGFB2, SSR1, CTNNB1, HOMER3, TIMM9, RPL11, SAR1B, SAR1A, EGFR, RAN, ERP29, VTI1B, OPTN, BCAP31, MAPK1, KRT18, SEC61B, RPAIN, USO1, SDCBP, SRP72, SEC61G, ARL6IP1, SNX9, DERL2, ARFGAP3, STX7, SNX6, MTX3, COPZ1, SNX2, NFKBIA, NAPA, RFFL, CALR, CD74, CDC37, TOMM7, MACF1, CSE1L, TOMM5, NPM1, SUPT7L, STX10, TRAM1, SRGN, SEC61A1, AP2M1, …	2426	411	13528	2.008	4.57331e-15	1.34509e-16	1.95219e-15
	GOTERM_BP_FAT	GO:0022900~electron transport chain	62	2.111	6.41231e-18	UQCRC2, UQCRC1, NDUFAB1, UQCRFS1, UQCRQ, NDUFS7, NDUFS6, NDUFS5, UQCR10, UQCR11, NDUFS4, NDUFS8, NDUFS2, NDUFS1, TXNL1, NDUFB11, NDUFB10, CYCS, NDUFC2, NDUFA13, CYB5A, NDUFC1, CYB5B, NDUFA10, NDUFA12, NDUFA11, UQCRH, DLD, TXN, CYBRD1, TXNRD1, UQCRB, NDUFB3, NDUFB4, TMX1, NDUFB6, NDUFB7, NDUFB8, TXN2, NDUFB2, GLRX2, ERO1L, ETFB, ETFA, GLRX, NDUFA4, NDUFA2, NDUFA3, NDUFA8, FADS1, NDUFA7, FADS3, FAD…	2426	114	13528	3.0327	2.82014e-14	8.05753e-16	1.20382e-14
	GOTERM_BP_FAT	GO:0022613~ribonucleoprotein complex biogenesis	82	2.79196	2.24051e-17	EIF6, NCBP2, RPL14, GAR1, SNRPD3, LSM6, RBM5, SNRPD1, SNRPD2, GNL3L, EIF2A, EBNA1BP2, SBDS, WDR36, DKC1, PRMT5, RPLP0, RPL11, GNL2, FTSJ1, RPL35A, PRPF31, GTPBP4, EXOSC9, EXOSC7, GTPBP5, SNUPN, BYSL, EXOSC5, EXOSC2, EXOSC3, MBNL1, MRTO4, PRPF6, EIF4A3, PA2G4, RPS19, PIH1D1, RPS16, RPS14, SNRNP200, RPS15, SNRPB, SLU7, CELF1, SNRPC, SNRPF, SNRPE, NHP2, SNRPG, NHP2L1, ERI1, FCF1, MINA, WDR55, RPS28,…	2426	180	13528	2.54029	9.85378e-14	2.73716e-15	4.20624e-14
	GOTERM_BP_FAT	GO:0032268~regulation of cellular protein metabolic process	160	5.44774	3.83847e-17	NCBP2, DLC1, SRP14, ZAK, AURKAIP1, IL6ST, PDGFA, EIF5, EIF5A, IL11, LUZP6, BAK1, APP, RBM8A, PUM1, EIF1, PUM2, MLST8, EIF2B2, RPS27A, EIF2B5, ADAM9, EGFR, BCL10, GTPBP4, ANAPC5, SOCS3, NRD1, SKP1, PSMA2, PSMA1, MAPK1, PA2G4, EIF2AK1, MAD2L1, PSMA6, PSMA5, PSMA4, EIF2S1, PSMA3, HSPB1, UBA52, CAV1, ENPP1, NFKBIA, ANAPC10, ANAPC11, CALR, PSMA7, PIN1, TIMP1, PSMB5, LIF, NR1H2, PSMB4, PSMB7, PSMB6, EI…	2426	474	13528	1.88228	1.68816e-13	4.56259e-15	7.20617e-14
	GOTERM_BP_FAT	GO:0006119~oxidative phosphorylation	55	1.87266	9.05915e-17	UQCRC2, ATP5E, ATP6V0E1, UQCRC1, ATP6AP1, ATP5B, NDUFAB1, NDUFS7, NDUFS6, NDUFS5, UQCR10, UQCR11, NDUFS4, NDUFS8, ATP5L, ATP5O, ATP5I, ATP5H, NDUFS2, NDUFS1, ATP5J, NDUFB10, NDUFC2, NDUFC1, NDUFA10, ATP6V1D, ATP6V1F, ATP6V1C1, ATP6V1A, UQCRH, DLD, ATP5C1, UQCRB, NDUFB3, NDUFB4, NDUFB6, NDUFB7, NDUFB8, ATP5G2, ATP6V1B2, ATP5G1, ATP5G3, ATP6V0B, NDUFB2, NDUFA4, NDUFA2, NDUFA3, NDUFA8, NDUFA7, ATP5F…	2426	98	13528	3.12953	4.88276e-13	1.22125e-14	2.10942e-13
	GOTERM_BP_FAT	GO:0032269~negative regulation of cellular protein metabolic process	81	2.75792	8.51609e-17	HSP90AB1, SRP14, BAK1, PSMD1, PSMD2, PSMD3, PSMD4, PSMD6, PSMD7, RPS27A, EIF2B5, PSMD9, PPP2R1A, GTPBP4, ANAPC5, NDUFA13, UBE2C, PRKCD, PSMA2, PSMA1, EIF4A3, EIF2AK1, MAD2L1, PSMA6, PSME1, PSME2, PSMA5, PSMA4, PSMA3, PEBP1, PSME3, UBB, UBA52, SRP9, CAV1, ENPP1, ANAPC10, FKBP1A, ANAPC11, CALR, PSMA7, TIMP1, PSMB5, PSMB4, PSMF1, PSMB7, SET, PSMB6, PSMB1, PSMB3, EIF3E, PPP2CA, ITGAV, PSMB2, TAF9, TH…	2426	180	13528	2.50932	4.88276e-13	1.25455e-14	2.10942e-13
	GOTERM_BP_FAT	GO:0048193~Golgi vesicle transport	66	2.24719	8.01319e-17	COPA, SEC31A, NRBP1, SEC24A, ATL3, TRAPPC2L, CLTC, TAPBP, COPB2, AP1S1, COPB1, PUM1, SAR1B, SEC24C, GOLGA5, CLINT1, SAR1A, GOLGA3, FTL, STX6, SEC23A, ARL1, SCAMP3, STX4, VTI1B, OPTN, ERGIC1, KIF1C, KRT18, SCYL1, VAMP8, TXNDC5, ARCN1, TRAPPC4, SORT1, TRAPPC1, SEC23B, TRAPPC3, COPE, ARFGAP1, TMX1, STX7, COPZ1, BET1, RER1, NAPA, LMAN1, FTH1, TMED10, SEC22B, SEC22C, EXOC5, SNAP23, STX10, HSPA8, RAB2A…	2426	131	13528	2.80941	4.88276e-13	1.28786e-14	2.10942e-13
	GOTERM_BP_FAT	GO:0034621~cellular macromolecular complex subunit organization	129	4.39224	2.58055e-16	EIF6, NCBP2, XPO1, XPO6, SNRPD3, RBM5, SNRPD1, SNRPD2, HIST1H2BO, PICALM, HIST1H2BN, H2AFV, HIST1H2BK, HIST1H2BL, HIST1H2BJ, H2AFZ, VMA21, H2AFY, H2AFX, TUBG1, H1F0, H2AFJ, ADRM1, SMARCE1, PTRF, RPS14, RPS15, SNRPB, SLU7, CELF1, SNRPC, STMN1, SNRPF, SNRPE, SNRPG, CAV2, CAV1, HMGB2, ARPC4, ANLN, CALR, PTK2, TUBB, HIST1H4A, CSE1L, HIST1H4B, RAC1, NPM1, HIST1H4C, HIST1H4H, HIST1H3J, DDX1, SMAD3, HIS…	2426	357	13528	2.01495	9.76552e-13	2.38698e-14	4.21885e-13
	GOTERM_BP_FAT	GO:0051248~negative regulation of protein metabolic process	82	2.79196	4.47844e-16	HSP90AB1, SRP14, BAK1, PSMD1, PSMD2, PSMD3, PSMD4, PSMD6, PSMD7, RPS27A, EIF2B5, PSMD9, PPP2R1A, GTPBP4, ANAPC5, NDUFA13, UBE2C, PRKCD, FLNA, PSMA2, PSMA1, EIF4A3, EIF2AK1, MAD2L1, PSMA6, PSME1, PSME2, PSMA5, PSMA4, PSMA3, PEBP1, PSME3, UBB, UBA52, SRP9, CAV1, ENPP1, ANAPC10, FKBP1A, ANAPC11, CALR, PSMA7, TIMP1, PSMB5, PSMB4, PSMF1, PSMB7, SET, PSMB6, PSMB1, PSMB3, EIF3E, PPP2CA, ITGAV, PSMB2, TA…	2426	187	13528	2.4452	1.9531e-12	4.65183e-14	8.32667e-13
	GOTERM_BP_FAT	GO:0034622~cellular macromolecular complex assembly	116	3.94961	3.97047e-15	NCBP2, EIF6, XPO1, XPO6, SNRPD3, RBM5, SNRPD1, SNRPD2, HIST1H2BO, PICALM, HIST1H2BN, HIST1H2BK, H2AFV, HIST1H2BL, HIST1H2BJ, H2AFZ, VMA21, H2AFY, H2AFX, TUBG1, H1F0, H2AFJ, ADRM1, RPS14, RPS15, SNRPB, SLU7, CELF1, SNRPC, SNRPF, SNRPE, SNRPG, CAV2, CAV1, HMGB2, ANLN, ARPC4, CALR, PTK2, TUBB, HIST1H4A, CSE1L, HIST1H4B, NPM1, RAC1, HIST1H4C, HIST1H4H, HIST1H3J, DDX1, SMAD3, HIST2H3D, HIST1H3A, HIST1…	2426	318	13528	2.03411	1.75779e-11	4.08784e-13	7.50511e-12
	GOTERM_BP_FAT	GO:0045333~cellular respiration	52	1.77051	1.00564e-14	UQCRC2, UQCRC1, NDUFAB1, PDHB, NDUFS7, NDUFS6, UQCR10, NDUFS5, NDUFS4, UQCR11, IDH3G, NDUFS8, CAT, NDUFS2, NDUFS1, NDUFB10, SUCLG2, ACO1, CYCS, NDUFC2, NDUFC1, NDUFA10, KIAA0100, NNT, UQCRH, DLD, MDH2, UQCRB, MDH1, NDUFB3, NDUFB4, NDUFB6, NDUFB7, NDUFB8, NDUFB2, IDH1, FH, NDUFA4, DLST, NDUFA2, NDUFA3, NDUFA8, NDUFA7, NDUFA1, IDH3A, UQCRHL, SOD2, SDHA, SDHB, NDUFV1, SDHC, NDUFV2, SDHD	2426	97	13528	2.98933	4.44331e-11	1.00986e-12	1.89626e-11
	GOTERM_BP_FAT	GO:0044265~cellular macromolecule catabolic process	213	7.2523	1.08839e-14	PPP2R5C, CD2AP, ERLEC1, CUL7, ISG15, BTBD1, RBM8A, PSENEN, ADAM9, CDCA3, AUP1, ANAPC5, UBE2J1, UBR2, SKP1, MYH9, MAD2L1, HUWE1, FBXL5, RAD23B, RAD23A, PABPC4, UBA6, PPT1, RFFL, CDC34, ARIH2, CACYBP, FBXO7, NPLOC4, UBE2L6, PCNP, CDC20, CDC26, UBE2L3, RNF8, UBA1, UBA2, UBA3, SMURF2, LDLR, TSG101, UBE2G1, UFC1, BNIP3, MLH1, RLIM, LONP1, MYC, ABCE1, ADAM10, AIFM1, CCNH, EXOSC7, GTF2H4, GTF2H3, PJA2, …	2426	725	13528	1.63827	4.78511e-11	1.06337e-12	2.04281e-11
	GOTERM_BP_FAT	GO:0044092~negative regulation of molecular function	119	4.05175	1.21585e-14	CAST, HMGCR, TGFB2, CDKN2D, ILK, SPRED1, NQO1, RPS27A, GTPBP4, ANAPC5, PKIG, PIM1, DDIT3, PSMA2, PSMA1, MAD2L1, PSMA6, PSMA5, PSMA4, PSMA3, CSTB, ATPIF1, UBA52, SIVA1, CAV1, GNAI3, SNX6, GNAI2, NFKBIA, ANAPC10, ANAPC11, PSMA7, PSMB5, PSMB4, PSMB7, PSMB6, PSMB1, HEXIM1, PSMB3, PSMB2, HERPUD1, TAF7, NDFIP1, CDC20, CDC26, PSMB8, PSMB9, NOSIP, PSMC6, CDKN1B, HDAC2, PSMC5, PSMC4, RGS3, PSMC3, PSMC2, P…	2426	334	13528	1.98675	5.37104e-11	1.16762e-12	2.29261e-11
	GOTERM_BP_FAT	GO:0006457~protein folding	76	2.58767	2.34426e-14	HSP90AB1, COPA, GRPEL1, RP2, VBP1, PDIA6, CCT2, CCT3, CANX, AIP, PIGK, DNAJB11, SLMAP, BAG2, SEP15, DNAJC7, PDRG1, DNAJC5, DNAJC19, HSP90AA1, ERP29, AARS, CCT6A, LRPAP1, ST13, TRAP1, PFDN2, UXT, PFDN1, PFDN6, TBCA, PFDN5, PFDN4, TBCC, SIL1, RUVBL2, FKBP2, FKBP8, FKBP4, PPIL1, FKBP3, FKBP1A, LMAN1, CALR, STUB1, CD74, PIN1, GLRX2, SH3GLB1, TOR1A, MPDU1, DNAJA1, HSPE1, ERO1L, QSOX1, HSPA8, DNAJA2, H…	2426	177	13528	2.39433	1.03026e-10	2.19202e-12	4.39759e-11
	GOTERM_BP_FAT	GO:0006511~ubiquitin-dependent protein catabolic process	94	3.20054	2.69365e-14	TSG101, UBE2G1, PPP2R5C, BAP1, CD2AP, ERLEC1, CUL7, PSMD1, PSMD2, PSMD3, PSMD4, PSMD6, PSMD7, RPS27A, PSMD9, TBL1XR1, CDK1, UBE2A, ANAPC5, DDB1, UBR2, UBE2I, SKP1, UBE2H, UBE2C, UBE2B, PSMA2, PSMA1, SEC61B, MAD2L1, PSMA6, PSME1, UBE2K, PSME2, PSMA5, PSMA4, PSMA3, PSME3, UBB, USP22, UBA52, RAD23B, DERL2, RAD23A, USP9X, USP4, ANAPC10, NEDD8, ANAPC11, PSMA7, EDEM1, STUB1, PSMB5, PSMB4, PSMF1, UBE2D3…	2426	242	13528	2.16598	1.18651e-10	2.47191e-12	5.06484e-11
	GOTERM_BP_FAT	GO:0009057~macromolecule catabolic process	223	7.59278	6.79617e-14	PPP2R5C, CD2AP, ERLEC1, CUL7, ISG15, BTBD1, RBM8A, PSENEN, ADAM9, CDCA3, AUP1, ANAPC5, UBE2J1, UBR2, SKP1, MYH9, MAD2L1, HUWE1, FBXL5, YME1L1, RAD23B, RAD23A, PABPC4, UBA6, PPT1, RFFL, CDC34, ARIH2, CACYBP, FBXO7, NPLOC4, UBE2L6, PCNP, CDC20, CDC26, UBE2L3, RNF8, UBA1, UBA2, UBA3, SMURF2, LDLR, TSG101, UBE2G1, UFC1, BNIP3, MLH1, RLIM, LONP1, MYC, DHCR24, ABCE1, ADAM10, AIFM1, CCNH, EXOSC7, GTF2H4…	2426	781	13528	1.5922	2.98825e-10	6.09846e-12	1.27554e-10
	GOTERM_BP_FAT	GO:0006605~protein targeting	85	2.89411	1.65599e-13	SRP14, XPO1, TSPO, GRPEL1, PDIA3, XPO6, XPO5, MLPH, TIMM17A, ATP6AP1, TIMM17B, EIF5A, SSR1, TGFB2, AIP, AKT1, HOMER3, SRPR, TIMM9, RPL11, TPR, KPNB1, DNAJC19, TOMM34, RAN, SNUPN, TP53, PRKCI, NDUFA13, IPO9, OPTN, TIMM23, TIMM44, MFN2, MAPK1, SEC61B, RPAIN, IPO7, NUP205, IPO5, TOMM20, SDCBP, TOMM22, SRP72, KPNA4, KPNA2, SEC61G, SRP9, BID, ARL6IP1, NXT1, YWHAZ, NUP98, MTX3, TIMM10, NFKBIA, TIMM13, …	2426	215	13528	2.20457	7.28508e-10	1.45701e-11	3.10973e-10
	GOTERM_BP_FAT	GO:0042254~ribosome biogenesis	58	1.9748	2.13006e-13	EIF6, RPL14, GAR1, LSM6, EIF2A, GNL3L, EBNA1BP2, SBDS, WDR36, DKC1, RPLP0, RPL11, GNL2, FTSJ1, RPL35A, GTPBP4, EXOSC9, GTPBP5, EXOSC7, BYSL, EXOSC5, EXOSC2, EXOSC3, MRTO4, EIF4A3, PA2G4, RPS19, RPS16, RPS14, RPS15, NHP2, NHP2L1, ERI1, FCF1, MINA, WDR55, RPS28, RPL7, BRIX1, NPM1, RPL5, RPL7A, RSL24D1, NSA2, RPS24, UTP23, RPL26, RPL24, RPS6, NOP10, RPF1, FBL, RPS7, DDX56, NOLC1, NOP56, POP4, PES1	2426	122	13528	2.65101	9.37002e-10	1.83726e-11	3.99969e-10
	GOTERM_BP_FAT	GO:0070271~protein complex biogenesis	155	5.27749	1.66227e-12	XPO1, HRAS, XPO6, TSPAN4, CAPZA2, CAPZA1, CD2AP, CTNNB1, TAPBP, GTF2E2, PICALM, ILK, VMA21, TUBG1, CUTA, BCL10, DARS, PCBD1, CD40, IRS1, SPAG9, ADRM1, PTRF, VAMP8, MED17, ATPIF1, VAMP3, LAMC1, SEPT7, SEPT9, TRAF1, CAV2, HSD17B10, CAV1, GRB2, ARPC4, ANLN, CALR, CD74, TUBB, PTK2, CSE1L, RAC1, NPM1, TAF9, MAP2K1, TAF7, EPRS, SMAD3, SEPT11, UQCRHL, PPIH, VCP, GTF2F1, GTF2F2, HSPD1, XPO7, COX11, AP2S1…	2426	505	13528	1.71152	7.31047e-09	1.40586e-10	3.12058e-09
	GOTERM_BP_FAT	GO:0006461~protein complex assembly	155	5.27749	1.66227e-12	XPO1, HRAS, XPO6, TSPAN4, CAPZA2, CAPZA1, CD2AP, CTNNB1, TAPBP, GTF2E2, PICALM, ILK, VMA21, TUBG1, CUTA, BCL10, DARS, PCBD1, CD40, IRS1, SPAG9, ADRM1, PTRF, VAMP8, MED17, ATPIF1, VAMP3, LAMC1, SEPT7, SEPT9, TRAF1, CAV2, HSD17B10, CAV1, GRB2, ARPC4, ANLN, CALR, CD74, TUBB, PTK2, CSE1L, RAC1, NPM1, TAF9, MAP2K1, TAF7, EPRS, SMAD3, SEPT11, UQCRHL, PPIH, VCP, GTF2F1, GTF2F2, HSPD1, XPO7, COX11, AP2S1…	2426	505	13528	1.71152	7.31047e-09	1.40586e-10	3.12058e-09
	GOTERM_BP_FAT	GO:0015980~energy derivation by oxidation of organic compounds	63	2.14505	1.77929e-12	UQCRC2, UQCRC1, IL6ST, NDUFAB1, PDHB, AKT1, NDUFS7, NDUFS6, NDUFS5, UQCR10, UQCR11, IDH3G, NDUFS4, NDUFS8, CAT, NDUFS2, NDUFS1, NDUFB10, SUCLG2, ACO1, CYCS, NDUFC2, NDUFC1, NDUFA10, PPP1CC, PPP1CB, ACADVL, KIAA0100, NNT, UQCRH, DLD, GNAS, MDH2, MDH1, UQCRB, NDUFB3, NDUFB4, NDUFB6, NDUFB7, NDUFB8, NDUFB2, PPP1R3B, IDH1, FH, NDUFA4, DLST, NDUFA2, NDUFA3, NDUFA8, NDUFA7, NDUFA1, IDH3A, UQCRHL, SOD2,…	2426	144	13528	2.43961	7.82511e-09	1.4491e-10	3.34027e-09
	GOTERM_BP_FAT	GO:0051603~proteolysis involved in cellular protein catabolic process	177	6.02656	1.75101e-12	TMEM189-UBE2V1, PPP2R5C, SAE1, CD2AP, ERLEC1, CUL7, ISG15, BTBD1, FBXO28, PSENEN, RPS27A, ADAM9, AUP1, CDCA3, ANAPC5, SOCS3, ENC1, UBE2J1, UBR2, SOCS5, SKP1, MYH9, PSMA2, PSMA1, MAD2L1, SEC61B, HUWE1, PSMA6, PSMA5, FBXO18, PSMA4, PSMA3, ASB1, FBXL5, UBA52, RAD23B, DERL2, ANAPC13, RAD23A, UBA6, UBE2V1, ANAPC10, NEDD8, UBE2V2, CDC34, ANAPC11, RFFL, PSMA7, RBX1, PSMB5, PSMB4, ARIH2, PSMB7, UBE2D3, U…	2426	600	13528	1.645	7.70109e-09	1.45304e-10	3.28733e-09
	GOTERM_BP_FAT	GO:0016192~vesicle-mediated transport	171	5.82227	2.44365e-12	HRAS, NRBP1, SEC31A, CHMP5, TRAPPC2L, RAB1A, CTNNB1, TAPBP, APP, PICALM, PACSIN2, PUM1, SAR1B, SAR1A, FTL, SCAMP3, VTI1B, OPTN, ERGIC1, YIF1A, ERGIC3, BCAP31, NPC1, NME2, KRT18, UNC13D, RAB18, SCYL1, LRP10, NME1, VAMP8, TXNDC5, USO1, TRAPPC5, TRAPPC4, VAMP4, VAMP3, TRAPPC1, VPS26A, TRAPPC3, SH3GL1, ARFGAP1, CAV2, ARFGAP2, RAB7A, TMX1, CAV1, ARFGAP3, STX7, GNAI3, CNIH, COPZ1, SNX2, CDC42SE1, RER1,…	2426	576	13528	1.65545	1.0747e-08	1.95399e-10	4.58751e-09
	GOTERM_BP_FAT	GO:0044257~cellular protein catabolic process	177	6.02656	2.80794e-12	TMEM189-UBE2V1, PPP2R5C, SAE1, CD2AP, ERLEC1, CUL7, ISG15, BTBD1, FBXO28, PSENEN, RPS27A, ADAM9, AUP1, CDCA3, ANAPC5, SOCS3, ENC1, UBE2J1, UBR2, SOCS5, SKP1, MYH9, PSMA2, PSMA1, MAD2L1, SEC61B, HUWE1, PSMA6, PSMA5, FBXO18, PSMA4, PSMA3, ASB1, FBXL5, UBA52, RAD23B, DERL2, ANAPC13, RAD23A, UBA6, UBE2V1, ANAPC10, NEDD8, UBE2V2, CDC34, ANAPC11, RFFL, PSMA7, RBX1, PSMB5, PSMB4, ARIH2, PSMB7, UBE2D3, U…	2426	603	13528	1.63681	1.23495e-08	2.20526e-10	5.27156e-09
	GOTERM_BP_FAT	GO:0043632~modification-dependent macromolecule catabolic process	170	5.78822	3.55361e-12	TMEM189-UBE2V1, PPP2R5C, SAE1, CD2AP, ERLEC1, CUL7, ISG15, BTBD1, FBXO28, RPS27A, AUP1, CDCA3, ANAPC5, SOCS3, ENC1, UBE2J1, UBR2, SOCS5, SKP1, PSMA2, PSMA1, MAD2L1, SEC61B, HUWE1, PSMA6, PSMA5, FBXO18, PSMA4, PSMA3, ASB1, FBXL5, UBA52, RAD23B, DERL2, ANAPC13, RAD23A, UBA6, UBE2V1, ANAPC10, NEDD8, UBE2V2, ANAPC11, RFFL, CDC34, PSMA7, RBX1, PSMB5, PSMB4, ARIH2, PSMB7, UBE2D3, UBE2D2, PSMB6, PSMB1, …	2426	574	13528	1.6515	1.56287e-08	2.69461e-10	6.67137e-09
	GOTERM_BP_FAT	GO:0019941~modification-dependent protein catabolic process	170	5.78822	3.55361e-12	TMEM189-UBE2V1, PPP2R5C, SAE1, CD2AP, ERLEC1, CUL7, ISG15, BTBD1, FBXO28, RPS27A, AUP1, CDCA3, ANAPC5, SOCS3, ENC1, UBE2J1, UBR2, SOCS5, SKP1, PSMA2, PSMA1, MAD2L1, SEC61B, HUWE1, PSMA6, PSMA5, FBXO18, PSMA4, PSMA3, ASB1, FBXL5, UBA52, RAD23B, DERL2, ANAPC13, RAD23A, UBA6, UBE2V1, ANAPC10, NEDD8, UBE2V2, ANAPC11, RFFL, CDC34, PSMA7, RBX1, PSMB5, PSMB4, ARIH2, PSMB7, UBE2D3, UBE2D2, PSMB6, PSMB1, …	2426	574	13528	1.6515	1.56287e-08	2.69461e-10	6.67137e-09
	GOTERM_BP_FAT	GO:0030163~protein catabolic process	181	6.16275	3.54425e-12	TMEM189-UBE2V1, PPP2R5C, SAE1, CD2AP, ERLEC1, CUL7, ISG15, BTBD1, FBXO28, PSENEN, RPS27A, ADAM9, AUP1, CDCA3, ANAPC5, SOCS3, ENC1, UBE2J1, UBR2, SOCS5, SKP1, MYH9, PSMA2, PSMA1, MAD2L1, SEC61B, HUWE1, PSMA6, PSMA5, FBXO18, PSMA4, PSMA3, ASB1, FBXL5, YME1L1, UBA52, RAD23B, DERL2, ANAPC13, RAD23A, UBA6, UBE2V1, ANAPC10, NEDD8, UBE2V2, PPT1, CDC34, ANAPC11, RFFL, PSMA7, RBX1, PSMB5, PSMB4, ARIH2, PS…	2426	622	13528	1.62267	1.55877e-08	2.73469e-10	6.65387e-09
	GOTERM_BP_FAT	GO:0043086~negative regulation of catalytic activity	98	3.33674	5.20137e-12	CAST, HMGCR, TGFB2, CDKN2D, ILK, SPRED1, NQO1, RPS27A, ANAPC5, PKIG, PSMA2, PSMA1, MAD2L1, PSMA6, PSMA5, PSMA4, PSMA3, CSTB, ATPIF1, UBA52, CAV1, GNAI3, SNX6, GNAI2, ANAPC10, ANAPC11, PSMA7, PSMB5, PSMB4, PSMB7, PSMB6, PSMB1, HEXIM1, PSMB3, PSMB2, HERPUD1, TAF7, CDC20, CDC26, PSMB8, PSMB9, PSMC6, NOSIP, PSMC5, CDKN1B, PSMC4, PSMC3, RGS3, PSMC2, PSMC1, DNAJB6, UBE2E1, PPARG, PRDX3, PDCD4, SPRY4, A…	2426	277	13528	1.97283	2.28757e-08	3.87724e-10	9.76486e-09
	GOTERM_BP_FAT	GO:0033365~protein localization in organelle	62	2.111	1.27138e-11	XPO1, SRP14, GRPEL1, TSPO, XPO6, PDIA3, TIMM17A, ATP6AP1, TIMM17B, TGFB2, AIP, AKT1, SRPR, TIMM9, TPR, KPNB1, DNAJC19, TOMM34, RAN, SNUPN, TP53, NDUFA13, IPO9, OPTN, TIMM23, TIMM44, MFN2, MAPK1, RPAIN, SEC61B, IPO7, NUP205, IPO5, TOMM20, TOMM22, KPNA4, SRP72, KPNA2, SRP9, SEC61G, BID, YWHAZ, NUP98, MTX3, TIMM10, NFKBIA, TIMM13, TOMM7, MACF1, CSE1L, TOMM5, SUPT7L, TNPO2, TNPO1, SEC61A1, SRGN, PPIH…	2426	146	13528	2.368	5.59149e-08	9.31916e-10	2.38682e-08
	GOTERM_BP_FAT	GO:0032270~positive regulation of cellular protein metabolic process	84	2.86006	6.69853e-11	DLC1, AURKAIP1, IL6ST, EIF5A, IL11, AKT1, PSMD1, PSMD2, PSMD3, PSMD4, MLST8, PSMD6, PSMD7, RPS27A, EIF2B5, ADAM9, PSMD9, CDK1, BCL10, ANAPC5, NRD1, SKP1, CDK4, RPS4X, UBE2C, UBE2N, PSMA2, MAPK1, PSMA1, CCND1, PSMA6, PSME1, PSME2, PSMA5, PSMA4, PSMA3, CD81, PSME3, UBB, UBA52, CAV1, HSD3B7, CSF1, NFKBIA, ANAPC10, FKBP1A, ANAPC11, PSMA7, STUB1, PIN1, PSMB5, LIF, NR1H2, PSMB4, PSMF1, PSMB7, PSMB6, PS…	2426	233	13528	2.01032	2.94601e-07	4.82953e-09	1.25755e-07
	GOTERM_BP_FAT	GO:0006354~RNA elongation	31	1.0555	7.64985e-11	POLR2H, POLR2G, POLR2F, POLR2E, POLR2L, POLR2K, POLR2J, POLR2I, POLR2C, POLR2B, GTF2E2, GTF2A2, TAF9, TCEA1, TCEA2, SUPT4H1, SUPT5H, ERCC2, CCNH, GTF2H4, GTF2H3, CDK9, CDK7, GTF2B, ELL2, TAF11, ADRM1, MNAT1, GTF2F1, GTF2F2, TCEB2	2426	51	13528	3.38949	3.3644e-07	5.42646e-09	1.43615e-07
	GOTERM_BP_FAT	GO:0007264~small GTPase mediated signal transduction	102	3.47293	7.96309e-11	GNA13, HRAS, RAB9A, IQGAP3, RAB1B, RAB1A, IQGAP1, RGL2, RALB, RRAS, RALA, RAB24, SAR1A, RAPGEF1, GTPBP2, GEM, MAPK1, RND3, RAB18, MAPK3, SDCBP, ARL8A, RAB12, ARL8B, RAB10, NGF, GPN1, RAB7A, GRB2, ARFRP1, MAPKAPK3, ARF6, MAPKAPK2, ARF5, RAC2, RAC1, ARHGDIA, ARHGDIB, RAB8A, ABR, RAB8B, MAP2K1, MAP2K2, ARFIP2, TAX1BP3, ARF1, ARF3, ARF4, RAP1A, RHEB, RIT1, RAB5B, RAB5C, RHOQ, RFXANK, CDC42, ARHGAP5, …	2426	305	13528	1.86485	3.50217e-07	5.559e-09	1.49496e-07
	GOTERM_BP_FAT	GO:0010608~posttranscriptional regulation of gene expression	78	2.65577	8.72138e-11	NCBP2, SRP14, RBM3, EIF5, EIF5A, EIF2A, AURKA, PTEN, YBX1, LUZP6, AKT1, APP, RBM8A, SND1, PUM1, QKI, EIF1, PUM2, EIF2B2, EIF2B5, GTPBP4, ACO1, NDUFA13, CDK4, RPS4X, PRKCD, UBE2B, FLNA, HNRNPU, SARNP, EIF4G1, MAPK1, EIF4G2, EIF4A3, TRNAU1AP, PA2G4, EIF2AK1, EIF4A2, EIF2S1, SERBP1, VEGFA, HSPB1, CELF1, PPP1R15B, PPP1R15A, SRP9, HSD3B7, MKNK2, MAPKAPK2, CALR, ZFP36L1, EIF3B, EIF3H, EIF3E, MTPN, KRT7…	2426	211	13528	2.06137	3.83566e-07	5.99322e-09	1.63731e-07
	GOTERM_BP_FAT	GO:0012501~programmed cell death	173	5.89036	1.26336e-10	DLC1, HRAS, TSPO, MRPL41, RBM5, PMAIP1, MRPS30, CTNNB1, MAGED1, BAK1, CLPTM1L, APP, RAD21, CDKN2D, NGFRAP1, PSENEN, DAP, ACIN1, API5, LUC7L3, RPS27A, CIB1, NET1, BCL10, YARS, OPA1, TBRG4, IL24, BCL2L13, STK4, DDIT4, NME6, BCAP31, KRT18, TIAL1, F3, MAPK8, PDCD6IP, NEK6, UBA52, NGF, SIVA1, TRAF1, MCL1, LITAF, TNFRSF12A, STK17B, RRAGA, NFKBIA, ARF6, PPT1, BCL2L1, STK17A, RFFL, PTRH2, FIS1, PEA15, CS…	2426	611	13528	1.57887	5.55626e-07	8.5481e-09	2.37178e-07
	GOTERM_BP_FAT	GO:0048285~organelle fission	82	2.79196	1.69448e-10	KIFC1, KIF22, SEPT2, AURKA, AURKB, PTTG1, CD2AP, KIF2C, RAD21, SEH1L, CDCA5, CCNA2, STAG2, TUBB3, CDCA3, CDK1, OPA1, ANAPC5, DSN1, RAN, TPX2, NUSAP1, UBE2I, UBE2C, WEE1, DCTN1, CDK2, NCAPD2, DCTN2, CHMP1A, MAD2L1, SPAG5, ZWINT, CLIP1, HAUS7, MAPRE1, RUVBL1, MAD2L2, SEPT7, NEK6, HAUS4, ANAPC13, NEK2, USP9X, CETN3, NEDD9, CETN2, ANLN, ANAPC10, ANAPC11, CEP55, RCC1, CCNG1, SPC24, FIS1, TUBB, NUMA1, …	2426	229	13528	1.99674	7.45232e-07	1.12914e-08	3.18114e-07
	GOTERM_BP_FAT	GO:0022904~respiratory electron transport chain	35	1.19169	1.94306e-10	NDUFB3, NDUFB4, NDUFB6, UQCRC1, NDUFB7, NDUFB8, NDUFAB1, NDUFB2, NDUFS7, NDUFS6, NDUFS5, UQCR10, NDUFS4, UQCR11, NDUFS8, NDUFS2, NDUFS1, NDUFA4, NDUFA2, NDUFA3, NDUFB10, NDUFA8, NDUFA7, NDUFC2, NDUFC1, NDUFA10, NDUFA1, UQCRHL, SOD2, SDHA, SDHB, UQCRH, NDUFV1, NDUFV2, DLD, UQCRB	2426	64	13528	3.04952	8.54557e-07	1.27546e-08	3.64781e-07
	GOTERM_BP_FAT	GO:0006915~apoptosis	170	5.78822	2.33574e-10	DLC1, HRAS, TSPO, MRPL41, RBM5, PMAIP1, MRPS30, CTNNB1, MAGED1, BAK1, CLPTM1L, APP, RAD21, NGFRAP1, PSENEN, DAP, ACIN1, API5, LUC7L3, RPS27A, CIB1, NET1, BCL10, YARS, OPA1, TBRG4, IL24, BCL2L13, STK4, DDIT4, NME6, BCAP31, KRT18, TIAL1, F3, MAPK8, PDCD6IP, NEK6, UBA52, NGF, SIVA1, TRAF1, MCL1, LITAF, TNFRSF12A, STK17B, RRAGA, NFKBIA, ARF6, PPT1, BCL2L1, STK17A, RFFL, PTRH2, FIS1, PEA15, CSE1L, MTC…	2426	602	13528	1.57469	1.02726e-06	1.51067e-08	4.38501e-07
	GOTERM_BP_FAT	GO:0051301~cell division	98	3.33674	2.92516e-10	KIFC1, MAEA, SEPT2, PRC1, PTTG1, AURKB, CD2AP, TGFB2, RAD21, CCNA2, CDCA5, STAG2, CDCA3, ANAPC5, RAN, MYH9, PPP1CC, PPP1CB, TACC1, WEE1, NCAPD2, MAD2L1, SPAG5, ZWINT, PELO, CDCA7L, PDCD6IP, MAD2L2, SEPT7, NEK6, SEPT9, ANAPC13, NEK2, NEDD9, ANLN, ANAPC10, ANAPC11, CCNG1, RCC1, SPC24, CDC123, SKA2, NUDC, SSSCA1, CKAP5, CINP, NUF2, CDC20, PMF1, CDC26, SEPT10, SEPT11, RNF8, TSG101, DAXX, DSTN, CDC42,…	2426	295	13528	1.85245	1.28649e-06	1.83784e-08	5.49157e-07
	GOTERM_BP_FAT	GO:0006120~mitochondrial electron transport, NADH to ubiquinone	27	0.919305	2.90044e-10	NDUFB3, NDUFB4, NDUFB6, NDUFB7, NDUFB8, NDUFAB1, NDUFB2, NDUFS7, NDUFS6, NDUFS5, NDUFS4, NDUFS8, NDUFS2, NDUFS1, NDUFA4, NDUFA2, NDUFA3, NDUFB10, NDUFA8, NDUFA7, NDUFC2, NDUFC1, NDUFA10, NDUFA1, NDUFV1, NDUFV2, DLD	2426	42	13528	3.58474	1.27561e-06	1.84871e-08	5.44514e-07
	GOTERM_BP_FAT	GO:0042773~ATP synthesis coupled electron transport	32	1.08955	3.10769e-10	NDUFB3, NDUFB4, UQCRC1, NDUFB6, NDUFB7, NDUFB8, NDUFAB1, NDUFB2, NDUFS7, NDUFS6, NDUFS5, UQCR10, NDUFS4, UQCR11, NDUFS8, NDUFS2, NDUFS1, NDUFA4, NDUFA2, NDUFA3, NDUFB10, NDUFA8, NDUFA7, NDUFC2, NDUFC1, NDUFA10, NDUFA1, UQCRHL, UQCRH, NDUFV1, NDUFV2, DLD, UQCRB	2426	56	13528	3.18643	1.36676e-06	1.92502e-08	5.83424e-07
	GOTERM_BP_FAT	GO:0042775~mitochondrial ATP synthesis coupled electron transport	32	1.08955	3.10769e-10	NDUFB3, NDUFB4, UQCRC1, NDUFB6, NDUFB7, NDUFB8, NDUFAB1, NDUFB2, NDUFS7, NDUFS6, NDUFS5, UQCR10, NDUFS4, UQCR11, NDUFS8, NDUFS2, NDUFS1, NDUFA4, NDUFA2, NDUFA3, NDUFB10, NDUFA8, NDUFA7, NDUFC2, NDUFC1, NDUFA10, NDUFA1, UQCRHL, UQCRH, NDUFV1, NDUFV2, DLD, UQCRB	2426	56	13528	3.18643	1.36676e-06	1.92502e-08	5.83424e-07
	GOTERM_BP_FAT	GO:0000280~nuclear division	79	2.68982	3.2449e-10	KIFC1, KIF22, SEPT2, AURKA, AURKB, PTTG1, CD2AP, KIF2C, RAD21, SEH1L, CDCA5, CCNA2, STAG2, TUBB3, CDCA3, CDK1, ANAPC5, DSN1, RAN, TPX2, NUSAP1, UBE2I, UBE2C, WEE1, DCTN1, CDK2, NCAPD2, DCTN2, CHMP1A, MAD2L1, SPAG5, ZWINT, CLIP1, HAUS7, MAPRE1, RUVBL1, MAD2L2, SEPT7, NEK6, HAUS4, ANAPC13, NEK2, USP9X, CETN3, NEDD9, CETN2, ANLN, ANAPC10, ANAPC11, CEP55, CCNG1, RCC1, SPC24, TUBB, NUMA1, NCAPG, BUB1,…	2426	220	13528	2.00238	1.42711e-06	1.98209e-08	6.09183e-07
	GOTERM_BP_FAT	GO:0007067~mitosis	79	2.68982	3.2449e-10	KIFC1, KIF22, SEPT2, AURKA, AURKB, PTTG1, CD2AP, KIF2C, RAD21, SEH1L, CDCA5, CCNA2, STAG2, TUBB3, CDCA3, CDK1, ANAPC5, DSN1, RAN, TPX2, NUSAP1, UBE2I, UBE2C, WEE1, DCTN1, CDK2, NCAPD2, DCTN2, CHMP1A, MAD2L1, SPAG5, ZWINT, CLIP1, HAUS7, MAPRE1, RUVBL1, MAD2L2, SEPT7, NEK6, HAUS4, ANAPC13, NEK2, USP9X, CETN3, NEDD9, CETN2, ANLN, ANAPC10, ANAPC11, CEP55, CCNG1, RCC1, SPC24, TUBB, NUMA1, NCAPG, BUB1,…	2426	220	13528	2.00238	1.42711e-06	1.98209e-08	6.09183e-07
	GOTERM_BP_FAT	GO:0000087~M phase of mitotic cell cycle	80	2.72387	3.3396e-10	KIFC1, KIF22, SEPT2, AURKA, AURKB, PTTG1, CD2AP, KIF2C, RAD21, SEH1L, CDCA5, CCNA2, STAG2, TUBB3, CDCA3, CDK1, ANAPC5, DSN1, RAN, TPX2, NUSAP1, UBE2I, UBE2C, WEE1, DCTN1, CDK2, NCAPD2, DCTN2, CHMP1A, MAD2L1, SPAG5, ZWINT, CLIP1, HAUS7, MAPRE1, RUVBL1, MAD2L2, SEPT7, NEK6, HAUS4, ANAPC13, NEK2, USP9X, CETN3, NEDD9, CETN2, ANLN, ANAPC10, ANAPC11, CEP55, CCNG1, RCC1, SPC24, TUBB, NUMA1, NCAPG, BUB1,…	2426	224	13528	1.99152	1.46875e-06	2.01199e-08	6.26961e-07
	GOTERM_BP_FAT	GO:0008219~cell death	195	6.63943	4.13052e-10	DLC1, HRAS, MRPL41, VAPB, CTNNB1, MAGED1, BAK1, CLPTM1L, APP, ATXN10, PSENEN, NGFRAP1, LUC7L3, YARS, OPA1, TBRG4, OPTN, BCL2L13, DCTN1, NME6, KRT18, F3, MAPK8, NEK6, SIVA1, STK17B, NFKBIA, ARF6, PPT1, BCL2L1, STK17A, RFFL, PEA15, TMEM123, RAC1, DIABLO, ABR, LGALS1, SRA1, GARS, SMAD3, TRIO, TAX1BP1, VDAC1, NCKAP1, FXR1, RABEP1, UBA1, CSRNP1, PARP4, RTN4, PPARD, BSCL2, BNIP3, DAXX, PTEN, RTN3, GPX1…	2426	719	13528	1.51234	1.8166e-06	2.45487e-08	7.75446e-07
	GOTERM_BP_FAT	GO:0006368~RNA elongation from RNA polymerase II promoter	29	0.987402	4.31644e-10	POLR2H, POLR2G, POLR2F, POLR2E, POLR2L, POLR2K, POLR2J, POLR2I, POLR2C, POLR2B, GTF2E2, GTF2A2, TAF9, SUPT4H1, SUPT5H, ERCC2, CCNH, GTF2H4, CDK9, GTF2H3, CDK7, GTF2B, ELL2, TAF11, ADRM1, MNAT1, GTF2F1, GTF2F2, TCEB2	2426	48	13528	3.36899	1.89837e-06	2.53116e-08	8.10348e-07
	GOTERM_BP_FAT	GO:0051247~positive regulation of protein metabolic process	84	2.86006	7.245e-10	DLC1, AURKAIP1, IL6ST, EIF5A, IL11, AKT1, PSMD1, PSMD2, PSMD3, PSMD4, MLST8, PSMD6, PSMD7, RPS27A, EIF2B5, ADAM9, PSMD9, CDK1, BCL10, ANAPC5, NRD1, SKP1, CDK4, RPS4X, UBE2C, UBE2N, PSMA2, MAPK1, PSMA1, CCND1, PSMA6, PSME1, PSME2, PSMA5, PSMA4, PSMA3, CD81, PSME3, UBB, UBA52, CAV1, HSD3B7, CSF1, NFKBIA, ANAPC10, FKBP1A, ANAPC11, PSMA7, STUB1, PIN1, PSMB5, LIF, NR1H2, PSMB4, PSMF1, PSMB7, PSMB6, PS…	2426	243	13528	1.9276	3.18634e-06	4.19256e-08	1.36014e-06
	GOTERM_BP_FAT	GO:0016265~death	195	6.63943	7.60235e-10	DLC1, HRAS, MRPL41, VAPB, CTNNB1, MAGED1, BAK1, CLPTM1L, APP, ATXN10, PSENEN, NGFRAP1, LUC7L3, YARS, OPA1, TBRG4, OPTN, BCL2L13, DCTN1, NME6, KRT18, F3, MAPK8, NEK6, SIVA1, STK17B, NFKBIA, ARF6, PPT1, BCL2L1, STK17A, RFFL, PEA15, TMEM123, RAC1, DIABLO, ABR, LGALS1, SRA1, GARS, SMAD3, TRIO, TAX1BP1, VDAC1, NCKAP1, FXR1, RABEP1, UBA1, CSRNP1, PARP4, RTN4, PPARD, BSCL2, BNIP3, DAXX, PTEN, RTN3, GPX1…	2426	724	13528	1.50189	3.34351e-06	4.34222e-08	1.42723e-06
	GOTERM_BP_FAT	GO:0006417~regulation of translation	56	1.90671	7.74723e-10	NCBP2, SRP14, EIF5, EIF5A, EIF2A, LUZP6, AKT1, APP, RBM8A, PUM1, QKI, EIF1, PUM2, EIF2B2, EIF2B5, ACO1, NDUFA13, RPS4X, CDK4, EIF4G1, SARNP, MAPK1, EIF4G2, EIF4A3, TRNAU1AP, PA2G4, EIF2AK1, EIF2S1, EIF4A2, HSPB1, PPP1R15B, PPP1R15A, SRP9, HSD3B7, MKNK2, CALR, ZFP36L1, EIF3B, EIF3H, KRT7, MTPN, EIF3E, EIF3K, THBS1, IL6, PAIP2, PAIP1, DDX1, ITGA2, ETF1, RPS5, EIF4B, EIF4E, EIF4H, NGDN, MIF4GD, EIF4…	2426	137	13528	2.27935	3.40722e-06	4.36824e-08	1.45443e-06
	GOTERM_BP_FAT	GO:0022403~cell cycle phase	125	4.25604	9.1401e-10	KIFC1, SEPT2, PRC1, RBM7, AURKA, AURKB, PTTG1, CD2AP, APP, RAD21, CDKN2C, CDKN2D, H2AFX, TUBG1, CCNA2, CDCA5, STAG2, CDCA3, EGFR, ANAPC5, RAN, PIM1, MND1, TBRG4, UBR2, TACC3, MYH9, PPP1CB, WEE1, DCTN1, NCAPD2, DCTN2, MAD2L1, SPAG5, ZWINT, CLIP1, STMN1, MAD2L2, SEPT7, NEK6, ANAPC13, NEK2, NEDD9, ANAPC10, ANLN, ANAPC11, CDC34, RCC1, CCNG1, ITGB1, SPC24, TUBB, CDC123, SKA2, NUDC, SSSCA1, MAP2K1, CKA…	2426	414	13528	1.68365	4.01981e-06	5.08837e-08	1.71592e-06
	GOTERM_BP_FAT	GO:0044093~positive regulation of molecular function	164	5.58393	1.0406e-09	GNA13, DLC1, GNA15, ZAK, TMEM189-UBE2V1, GNA11, LPAR1, PMAIP1, TGFB2, BAK1, ILK, PSENEN, PRKACA, RPS27A, ADAM9, EGFR, BCL10, ACTN4, ANAPC5, PIM1, STIM1, SKP1, BCL2L13, IRS1, PPP1CB, PSMA2, SPAG9, PSMA1, NME2, HIF1A, PSMA6, NME1, PSMA5, F3, PSMA4, PSMA3, EDF1, UBA52, SIVA1, CAV1, ADORA2B, GNAI2, UBE2V1, ANAPC10, ANAPC11, PSMA7, CD74, PIN1, PSMB5, NR1H2, SERINC2, PSMB4, PSMB7, PSMB6, PSMB1, SMARCB1…	2426	586	13528	1.56059	4.57655e-06	5.72071e-08	1.95358e-06
	GOTERM_BP_FAT	GO:0042981~regulation of apoptosis	211	7.1842	1.59106e-09	XRCC5, DLC1, HRAS, CITED2, MAGED1, BAK1, APP, CD44, ILK, RPL11, PSENEN, NGFRAP1, DDAH2, ADAM9, PTPRF, AARS, PIM1, BCL2L13, NME6, MAPK1, NME2, UNC13D, KRT18, NME1, TXNDC5, F3, VEGFA, MAPK9, MAPK8, SIVA1, TMX1, STK17B, NFKBIA, PPT1, STK17A, BCL2L1, CALR, CD74, SERINC3, PEA15, RAC1, DIABLO, ABR, BECN1, LGALS1, PHB, SMAD3, TRIO, RPS6, TAX1BP1, EI24, ETS1, RTN4, PDIA3, BNIP3, MLH1, DAXX, PTEN, GPX1, D…	2426	804	13528	1.46342	6.99748e-06	8.63889e-08	2.98699e-06
	GOTERM_BP_FAT	GO:0010941~regulation of cell death	213	7.2523	1.9153e-09	XRCC5, DLC1, HRAS, CITED2, MAGED1, BAK1, APP, CD44, ILK, RPL11, PSENEN, NGFRAP1, DDAH2, ADAM9, PTPRF, AARS, PIM1, BCL2L13, NME6, MAPK1, NME2, UNC13D, KRT18, NME1, TXNDC5, F3, VEGFA, MAPK9, MAPK8, SIVA1, TMX1, STK17B, NFKBIA, PPT1, STK17A, BCL2L1, CALR, CD74, SERINC3, PEA15, RAC1, DIABLO, ABR, BECN1, LGALS1, PHB, SMAD3, TRIO, RPS6, TAX1BP1, EI24, ETS1, RTN4, PDIA3, BNIP3, MLH1, DAXX, PTEN, GPX1, D…	2426	815	13528	1.45735	8.42347e-06	1.02726e-07	3.5957e-06
	GOTERM_BP_FAT	GO:0043067~regulation of programmed cell death	212	7.21825	2.30802e-09	XRCC5, DLC1, HRAS, CITED2, MAGED1, BAK1, APP, CD44, ILK, RPL11, PSENEN, NGFRAP1, DDAH2, ADAM9, PTPRF, AARS, PIM1, BCL2L13, NME6, MAPK1, NME2, UNC13D, KRT18, NME1, TXNDC5, F3, VEGFA, MAPK9, MAPK8, SIVA1, TMX1, STK17B, NFKBIA, PPT1, STK17A, BCL2L1, CALR, CD74, SERINC3, PEA15, RAC1, DIABLO, ABR, BECN1, LGALS1, PHB, SMAD3, TRIO, RPS6, TAX1BP1, EI24, ETS1, RTN4, PDIA3, BNIP3, MLH1, DAXX, PTEN, GPX1, D…	2426	812	13528	1.45587	1.01506e-05	1.22297e-07	4.33296e-06
	GOTERM_BP_FAT	GO:0007005~mitochondrion organization	55	1.87266	3.28964e-09	TSPO, GRPEL1, TIMM17A, TIMM17B, BNIP3, MPV17, PMAIP1, PRDX3, CXADR, NDUFAF3, AIP, AKT1, NDUFS7, GPX1, BAK1, NDUFS5, CASP3, LONP1, NDUFS4, NDUFS8, TIMM9, MYC, DNAJC19, TOMM34, OPA1, HSP90AA1, SSBP1, TP53, TIMM23, TIMM44, MFN2, MAN2A1, LETM1, TOMM20, TOMM22, BID, CAV2, YWHAZ, MTX3, TIMM10, TIMM13, BCL2L1, SFN, FIS1, TFAM, TOMM7, MRPL12, SH3GLB1, TOMM5, HSPA4, SMAD3, SOD2, PPIF, BAX, DAP3	2426	138	13528	2.22242	1.44678e-05	1.72236e-07	6.17583e-06
	GOTERM_BP_FAT	GO:0031401~positive regulation of protein modification process	68	2.31529	3.47742e-09	DLC1, IL6ST, IL11, PSMD1, PSMD2, PSMD3, PSMD4, MLST8, PSMD6, PSMD7, RPS27A, PSMD9, BCL10, CDK1, ANAPC5, SKP1, UBE2C, UBE2N, PSMA2, PSMA1, CCND1, PSMA6, PSME1, PSMA5, PSME2, PSMA4, PSMA3, CD81, PSME3, UBB, UBA52, CAV1, ANAPC10, FKBP1A, ANAPC11, PSMA7, STUB1, PIN1, PSMB5, LIF, PSMB4, PSMF1, PSMB7, PSMB6, PSMB1, PSMB3, PSMB2, IL6, NDFIP1, CDC20, RICTOR, CDC26, PSMB8, PSMB9, CCNB1, PSMC6, PSMD14, PSM…	2426	187	13528	2.02773	1.52936e-05	1.79926e-07	6.52834e-06
	GOTERM_BP_FAT	GO:0031399~regulation of protein modification process	94	3.20054	7.57398e-09	DLC1, ZAK, IL6ST, PDGFA, DAXX, PDCD4, IL11, BAK1, NDUFS4, PSMD1, PSMD2, PSMD3, PSMD4, MLST8, PSMD6, PSMD7, RPS27A, PSMD9, EGFR, PPP2R1A, CDK1, BCL10, GTPBP4, ANAPC5, SOCS3, PKN1, SKP1, UBE2C, PRKCD, UBE2N, PSMA2, PSMA1, CCND1, MAD2L1, PSMA6, PSME1, PSME2, PSMA5, PSMA4, PSMA3, CD81, PEBP1, PSME3, UBB, UBA52, ZER1, CAV1, ENPP1, ANAPC10, FKBP1A, ANAPC11, PSMA7, STUB1, PIN1, PSMB5, LIF, PSMB4, PSMF1,…	2426	295	13528	1.77684	3.33098e-05	3.8733e-07	1.4219e-05
	GOTERM_BP_FAT	GO:0006364~rRNA processing	41	1.39598	1.07898e-08	RPL14, GAR1, LSM6, ERI1, FCF1, SBDS, WDR36, WDR55, RPS28, DKC1, RPL7, RPL5, RPL11, FTSJ1, NSA2, RPS24, UTP23, RPL35A, EXOSC9, EXOSC7, EXOSC5, RPL26, EXOSC2, EXOSC3, RPS6, NOP10, RPF1, FBL, RPS7, EIF4A3, DDX56, PA2G4, RPS19, NOLC1, RPS16, RPS14, RPS15, NOP56, POP4, PES1, NHP2	2426	92	13528	2.48507	4.74525e-05	5.45444e-07	2.02563e-05
	GOTERM_BP_FAT	GO:0017038~protein import	52	1.77051	1.09276e-08	XPO1, GRPEL1, TSPO, XPO6, PDIA3, TIMM17A, ATP6AP1, TIMM17B, TGFB2, AIP, AKT1, TIMM9, TPR, KPNB1, DNAJC19, TOMM34, RAN, SNUPN, TP53, NDUFA13, IPO9, TIMM23, TIMM44, MFN2, MAPK1, RPAIN, SEC61B, IPO7, NUP205, IPO5, TOMM20, TOMM22, KPNA4, KPNA2, BID, YWHAZ, NUP98, MTX3, TIMM10, NFKBIA, TIMM13, TOMM7, CSE1L, TOMM5, TNPO2, TNPO1, PPIH, RPL23, PTTG1IP, SPTBN1, NUTF2, XPO7	2426	131	13528	2.21348	4.80585e-05	5.46133e-07	2.0515e-05
	GOTERM_BP_FAT	GO:0051726~regulation of cell cycle	102	3.47293	1.17301e-08	DYNC1LI1, XPO1, MAEA, AURKAIP1, ZAK, RPS27L, CITED2, TGFB2, BAK1, APP, CUL7, CDKN2C, CDKN2D, H2AFX, CCNA2, EGFR, GTPBP4, PIM1, TACC3, PPP1CB, JUNB, MAD2L1BP, MAD2L1, ZWINT, MAD2L2, NEK6, NGF, CAV2, NEK2, ANLN, ANAPC10, CCNG1, RCC1, CALR, ITGB1, CDC37, PIN1, LIF, HEXIM1, NPM1, CDC123, SMAD3, PTPN11, HDAC2, CDKN1B, HDAC1, ETS1, UBA3, COPS5, PDCD4, PTEN, AKT1, CDC42, SBDS, CASP3, PCBP4, PRMT5, CDK5R…	2426	331	13528	1.71836	5.15876e-05	5.79651e-07	2.20215e-05
	GOTERM_BP_FAT	GO:0045454~cell redox homeostasis	32	1.08955	1.37444e-08	TMX2, GLRX3, TMX1, PTGES2, PDIA3, TXN2, PRDX4, PDIA6, PRDX5, PRDX2, PRDX3, PDIA4, PRDX1, GLRX2, GPX1, QSOX1, APEX1, GLRX, TXNL1, SEPW1, P4HB, AIFM1, C11ORF31, DDIT3, TXNDC12, NXN, PRDX6, TXNDC5, TXN, DLD, TXNRD1, SH3BGRL3	2426	63	13528	2.83238	6.04462e-05	6.71645e-07	2.58032e-05
	GOTERM_BP_FAT	GO:0000279~M phase	101	3.43888	1.72769e-08	KIFC1, SEPT2, PRC1, AURKA, RBM7, PTTG1, AURKB, CD2AP, RAD21, H2AFX, TUBG1, CCNA2, CDCA5, STAG2, CDCA3, ANAPC5, RAN, MND1, UBR2, TACC3, MYH9, DCTN1, WEE1, DCTN2, NCAPD2, MAD2L1, SPAG5, ZWINT, CLIP1, STMN1, MAD2L2, SEPT7, NEK6, ANAPC13, NEK2, NEDD9, ANLN, ANAPC10, ANAPC11, CCNG1, RCC1, SPC24, TUBB, SKA2, NUDC, SSSCA1, MAP2K1, CKAP5, NUF2, CDC20, PMF1, CDC26, RNF8, NOLC1, KIF22, MLH1, KIF2C, SEH1L, …	2426	329	13528	1.71186	7.5981e-05	8.34988e-07	3.24349e-05
	GOTERM_BP_FAT	GO:0043085~positive regulation of catalytic activity	143	4.86891	4.52738e-08	GNA13, DLC1, GNA15, ZAK, GNA11, LPAR1, PMAIP1, TGFB2, BAK1, ILK, PSENEN, PRKACA, RPS27A, ADAM9, EGFR, ANAPC5, PIM1, SKP1, BCL2L13, PPP1CB, IRS1, PSMA2, SPAG9, PSMA1, HIF1A, PSMA6, PSMA5, F3, PSMA4, PSMA3, UBA52, SIVA1, CAV1, ADORA2B, GNAI2, ANAPC10, ANAPC11, PSMA7, CD74, PIN1, PSMB5, NR1H2, SERINC2, PSMB4, PSMB7, PSMB6, PSMB1, PSMB3, SERINC1, PSMB2, MTCH1, RAC1, NPM1, DIABLO, HSPE1, TRAF7, GABARA…	2426	520	13528	1.53347	0.000199094	2.16428e-06	8.49949e-05
	GOTERM_BP_FAT	GO:0016072~rRNA metabolic process	41	1.39598	4.59473e-08	RPL14, GAR1, LSM6, ERI1, FCF1, SBDS, WDR36, WDR55, RPS28, DKC1, RPL7, RPL5, RPL11, FTSJ1, NSA2, RPS24, UTP23, RPL35A, EXOSC9, EXOSC7, EXOSC5, RPL26, EXOSC2, EXOSC3, RPS6, NOP10, RPF1, FBL, RPS7, EIF4A3, DDX56, PA2G4, RPS19, NOLC1, RPS16, RPS14, RPS15, NOP56, POP4, PES1, NHP2	2426	96	13528	2.38153	0.000202056	2.17286e-06	8.62594e-05
	GOTERM_BP_FAT	GO:0006888~ER to Golgi vesicle-mediated transport	24	0.81716	8.04772e-08	SEC23A, RAB2A, TMX1, SEC24A, NRBP1, SEC31A, ATL3, TRAPPC2L, BET1, LMAN1, ERGIC1, PREB, VCP, TRAPPC4, SEC13, SEC22B, SEC22C, SEC24C, SAR1B, TRAPPC1, SAR1A, YKT6, SEC23B, TRAPPC3	2426	42	13528	3.18643	0.000353876	3.7653e-06	0.000151084
	GOTERM_BP_FAT	GO:0016044~membrane organization	110	3.74532	1.38339e-07	HRAS, SEC31A, VAPA, BAK1, APP, PICALM, PACSIN2, TIMM9, PUM1, SAR1B, FTL, EGFR, OPA1, VTI1B, NPC1, LETM1, NME2, UNC13D, LRP10, RAB18, VAMP8, NME1, TXNDC5, USO1, VAMP3, SH3GL1, ARFGAP1, CAV2, RAB7A, CAV1, STX7, GNAI3, COPZ1, SNX2, CDC42SE1, NAPA, PPT1, BCL2L1, SNX3, FTH1, ITGAV, RAC1, MTCH1, EMD, RAB8A, NPLOC4, TGFBR2, PPIF, CORO1C, RABEP1, ARF1, SEC13, COPA, SEC24A, LDLR, ATP5B, AP2S1, BNIP3, CLTC…	2426	381	13528	1.60994	0.000608229	6.40434e-06	0.00025971
	GOTERM_BP_FAT	GO:0010605~negative regulation of macromolecule metabolic process	187	6.36704	1.53672e-07	SRP14, CCDC85B, XPO5, RBM3, FST, CBX3, MAF1, TCEAL1, CTNNB1, CITED2, BAK1, SND1, SUPT5H, RPS27A, EIF2B5, GTPBP4, ANAPC5, PKIG, MECP2, PSMA2, PSMA1, PA2G4, EIF2AK1, MAD2L1, SMARCE1, PSMA6, PSMA5, RPS14, PSMA4, PSMA3, ASB1, TGIF1, RPS13, CELF1, UBA52, HMGB1, EID1, HMGB2, CAV1, ENPP1, SNX6, ANAPC10, BCL2L1, ANAPC11, CALR, PSMA7, VPS72, TIMP1, PSMB5, NR1H2, RPS26, PSMB4, PSMB7, PSMB6, PSMB1, HEXIM1, …	2426	734	13528	1.42065	0.000675622	7.04008e-06	0.000288497
	GOTERM_BP_FAT	GO:0009060~aerobic respiration	21	0.715015	2.22206e-07	UQCRC2, DLST, UQCRC1, SUCLG2, ACO1, PDHB, IDH3A, UQCRHL, SDHA, KIAA0100, SDHB, NNT, IDH3G, UQCRH, SDHC, SDHD, IDH1, CAT, MDH2, UQCRB, MDH1, FH	2426	35	13528	3.34575	0.000976785	1.00748e-05	0.000417158
	GOTERM_BP_FAT	GO:0009259~ribonucleotide metabolic process	53	1.80456	3.06174e-07	ATP5E, ATP6V0E1, ATP1B1, ATP6AP1, RP2, ATP5B, RHOQ, LONP1, ATP2B4, ATP5S, ATP5L, ATP5O, ATP5I, NT5E, ATP5H, IMPDH1, NDUFS1, IMPDH2, ATP5J, NUDT5, OLA1, ATP6V1D, GMPS, ATP6V1F, NME6, ATP6V1C1, ATP6V1A, NME2, NME1, ATP2C1, ADK, ATP5C1, PRPS2, PRPS1, ALDOA, ADSS, ATP5G2, ATP5G1, ATP6V1B2, ATP5G3, ATP6V0B, CMPK1, RAB11A, ATP5J2, ATP5F1, AK3, NADK, ATP1A1, ACLY, ATP13A3, NME1-NME2, ATP2A2, ATP6V1E1, A…	2426	147	13528	2.01049	0.00134565	1.37402e-05	0.000574795
	GOTERM_BP_FAT	GO:0006986~response to unfolded protein	32	1.08955	4.2534e-07	HSP90AB1, DERL2, VAPB, SKIV2L, SERPINH1, EDEM1, MANF, TOR1A, ATF6B, DNAJA1, HSPA4, HSPE1, ERO1L, DDAH2, HSPA8, HERPUD1, HSP90AA1, CFB, AARS, CSNK2B, CLIC1, DDIT3, ATF6, CCND1, VCP, HSPB1, DNAJB1, NFE2L2, HSPD1, PPP1R15A, UBXN4, DNAJB6	2426	71	13528	2.51324	0.0018689	1.87063e-05	0.00079851
	GOTERM_BP_FAT	GO:0006413~translational initiation	24	0.81716	4.25126e-07	PAIP1, EIF5, EIF2S3, DENR, RPS5, GTF2B, RPS3, EIF3D, EIF4E, EIF3B, EIF3G, RPS3A, EIF3H, EIF3E, EIF3F, EIF2S2, EIF3K, EIF3L, EIF1, EIF3I, EIF2B2, EIF3M, EIF4E2, EIF2B5	2426	45	13528	2.974	0.00186796	1.88857e-05	0.000798109
	GOTERM_BP_FAT	GO:0034660~ncRNA metabolic process	73	2.48553	4.96797e-07	RPL14, NARS, GAR1, LSM6, QARS, WARS, SBDS, WDR36, DKC1, RPL11, FTSJ1, TPR, DUS1L, RPL35A, CARS, YARS, EXOSC9, DARS, RPP21, EXOSC7, SARS, AARS, EXOSC5, EXOSC2, EXOSC3, TARS, EIF4A3, PA2G4, RPS19, RPS16, RPS14, RARS, RPS15, HARS, TRUB2, NHP2, CPSF3L, HSD17B10, ELAC2, HSD3B7, TYW3, ERI1, TRPT1, FCF1, KARS, DTD1, IARS, WDR55, RPS28, RPL7, RPL5, KIAA0391, NSA2, RPS24, MARS, UTP23, AIMP1, GARS, RPL26, …	2426	230	13528	1.76986	0.00218253	2.16326e-05	0.00093266
	GOTERM_BP_FAT	GO:0006099~tricarboxylic acid cycle	16	0.544774	6.9717e-07	DLST, SUCLG2, ACO1, PDHB, IDH3A, KIAA0100, SDHA, SDHB, NNT, IDH3G, SDHC, SDHD, IDH1, MDH2, FH, MDH1	2426	23	13528	3.87914	0.00306146	3.00599e-05	0.00130883
	GOTERM_BP_FAT	GO:0046356~acetyl-CoA catabolic process	16	0.544774	6.9717e-07	DLST, SUCLG2, ACO1, PDHB, IDH3A, KIAA0100, SDHA, SDHB, NNT, IDH3G, SDHC, SDHD, IDH1, MDH2, FH, MDH1	2426	23	13528	3.87914	0.00306146	3.00599e-05	0.00130883
	GOTERM_BP_FAT	GO:0006626~protein targeting to mitochondrion	20	0.680967	7.18435e-07	BID, GRPEL1, YWHAZ, TSPO, MTX3, TIMM17A, TIMM17B, TIMM10, TIMM13, TIMM23, TIMM44, AIP, MFN2, TOMM7, TOMM5, TIMM9, TOMM20, TOMM22, DNAJC19, TOMM34	2426	34	13528	3.28015	0.00315469	3.0676e-05	0.00134875
	GOTERM_BP_FAT	GO:0070585~protein localization in mitochondrion	20	0.680967	7.18435e-07	BID, GRPEL1, YWHAZ, TSPO, MTX3, TIMM17A, TIMM17B, TIMM10, TIMM13, TIMM23, TIMM44, AIP, MFN2, TOMM7, TOMM5, TIMM9, TOMM20, TOMM22, DNAJC19, TOMM34	2426	34	13528	3.28015	0.00315469	3.0676e-05	0.00134875
	GOTERM_BP_FAT	GO:0006839~mitochondrial transport	31	1.0555	7.26999e-07	BID, TSPO, YWHAZ, GRPEL1, MTX3, TIMM17A, TIMM17B, TIMM10, BNIP3, TIMM13, BCL2L1, AIP, STARD3, BAK1, TOMM7, TOMM5, TIMM9, ATP5O, DNAJC19, TOMM34, HSP90AA1, TP53, TIMM23, TIMM44, MFN2, PPIF, UCP2, BAX, TOMM20, SLC25A37, TOMM22	2426	69	13528	2.50527	0.00319224	3.07432e-05	0.00136483
	GOTERM_BP_FAT	GO:0015985~energy coupled proton transport, down electrochemical gradient	22	0.749064	7.58348e-07	ATP5E, ATP6V0E1, ATP5B, ATP6AP1, ATP5F1, ATP5G2, ATP6V1B2, ATP5G1, ATP5G3, ATP6V1D, ATP6V0B, ATP6V1F, ATP6V1C1, ATP6V1A, ATP6V1E1, ATP5C1, ATP5L, ATP5O, ATP5A1, ATP5I, ATP5H, ATP5J	2426	40	13528	3.06694	0.00332966	3.17634e-05	0.00142368
	GOTERM_BP_FAT	GO:0015986~ATP synthesis coupled proton transport	22	0.749064	7.58348e-07	ATP5E, ATP6V0E1, ATP5B, ATP6AP1, ATP5F1, ATP5G2, ATP6V1B2, ATP5G1, ATP5G3, ATP6V1D, ATP6V0B, ATP6V1F, ATP6V1C1, ATP6V1A, ATP6V1E1, ATP5C1, ATP5L, ATP5O, ATP5A1, ATP5I, ATP5H, ATP5J	2426	40	13528	3.06694	0.00332966	3.17634e-05	0.00142368
	GOTERM_BP_FAT	GO:0033043~regulation of organelle organization	69	2.34934	9.81141e-07	DLC1, DYNC1LI1, XPO1, LIMA1, AURKAIP1, PDGFA, CAPZA2, CAPZA1, RHOQ, CTNNB1, DSTN, ACTR3, CDC42, SBDS, CUL7, GSN, PRMT5, ILK, RHOA, RANBP1, MLST8, TPR, MYC, STMN3, NUSAP1, TMSB10, MID1IP1, UBE2N, ARPC1A, ARPC1B, MAD2L1, CFL1, PEBP1, TMSB4X, MAPRE1, MAD2L2, NEK6, CAV2, CAV1, NEK2, ANAPC10, RDX, ARF6, ARPC5, RCC1, CAPZB, PIN1, CDC42EP2, SET, MACF1, ARPC2, NPM1, RAC1, BUB1, SKA2, RASA1, ERCC1, DLGAP5…	2426	217	13528	1.7731	0.00430577	4.07073e-05	0.00184193
	GOTERM_BP_FAT	GO:0051789~response to protein stimulus	41	1.39598	1.39974e-06	HSP90AB1, DERL2, VAPB, SKIV2L, DEK, BCL2L1, NR3C1, SERPINH1, EDEM1, MANF, TTC3, ACTR3, FOS, ATF6B, TOR1A, DNAJA1, HSPA4, HSPE1, ERO1L, DDAH2, HSPA8, CYR61, HERPUD1, HSP90AA1, CFB, MAP1B, AARS, CSNK2B, ITGA2, CLIC1, DDIT3, ATF6, CCND1, VCP, HSPB1, DNAJB1, NFE2L2, HSPD1, PPP1R15A, UBXN4, DNAJB6	2426	107	13528	2.1367	0.00613716	5.75317e-05	0.00262778
	GOTERM_BP_FAT	GO:0043065~positive regulation of apoptosis	117	3.98366	1.5116e-06	DLC1, ZAK, RBM5, EIF5A, RPS27L, PMAIP1, TGFB2, MAGED1, BAK1, APP, CD44, CDKN2C, PSENEN, RPL11, NGFRAP1, DAP, NQO1, RPS27A, NET1, BCL10, PTPRF, BCL2L13, STK4, DDIT3, MAPK1, UNC13D, TIAL1, MAPK9, MAPK8, UBA52, NGF, SIVA1, STK17B, BCL2L1, STK17A, SERINC3, TUBB, RAC1, MTCH1, DIABLO, DYRK2, CFLAR, ABR, TRIO, SMAD3, RPS6, TXNDC12, EI24, TNFSF10, UACA, CDKN1B, ETS1, HSPD1, PDCD5, PDCD6, DAP3, PDIA3, BNI…	2426	430	13528	1.51726	0.00662597	6.09891e-05	0.00283777
	GOTERM_BP_FAT	GO:0009150~purine ribonucleotide metabolic process	49	1.66837	1.50534e-06	ATP5E, ATP6V0E1, ATP1B1, ATP6AP1, RP2, ATP5B, RHOQ, LONP1, ATP2B4, ATP5S, ATP5L, ATP5O, ATP5I, NT5E, ATP5H, IMPDH1, NDUFS1, IMPDH2, ATP5J, OLA1, ATP6V1D, GMPS, NME6, ATP6V1F, ATP6V1C1, ATP6V1A, NME2, NME1, ATP2C1, ATP5C1, PRPS1, ALDOA, ADSS, ATP5G2, ATP6V1B2, ATP5G1, ATP5G3, ATP6V0B, RAB11A, ATP5J2, AK3, ATP5F1, NADK, ATP1A1, ACLY, ATP13A3, NME1-NME2, ATP2A2, ATP6V1E1, ATP5A1, PAICS	2426	138	13528	1.97998	0.00659864	6.12991e-05	0.00282603
	GOTERM_BP_FAT	GO:0010942~positive regulation of cell death	118	4.01771	1.58545e-06	DLC1, ZAK, RBM5, EIF5A, RPS27L, PMAIP1, TGFB2, MAGED1, BAK1, APP, CD44, CDKN2C, PSENEN, RPL11, NGFRAP1, DAP, NQO1, RPS27A, NET1, BCL10, PTPRF, BCL2L13, STK4, DDIT3, MAPK1, UNC13D, TIAL1, MAPK9, MAPK8, UBA52, NGF, SIVA1, STK17B, RRAGA, BCL2L1, STK17A, SERINC3, TUBB, RAC1, MTCH1, DIABLO, DYRK2, CFLAR, ABR, TRIO, SMAD3, RPS6, TXNDC12, EI24, TNFSF10, UACA, CDKN1B, ETS1, HSPD1, PDCD5, PDCD6, DAP3, PDI…	2426	435	13528	1.51264	0.00694857	6.33873e-05	0.00297641
	GOTERM_BP_FAT	GO:0034728~nucleosome organization	37	1.25979	1.7919e-06	HIST4H4, HP1BP3, NAP1L1, HIST1H2BO, HIST2H2AB, HIST1H2BN, HIST1H2BK, H2AFV, HIST1H2BL, HIST2H2AC, HIST1H2BJ, H2AFZ, H2AFY, H2AFX, H1F0, HIST1H1E, HIST1H1C, H2AFJ, HMGA1, SMARCE1, HIST2H2BE, HIST2H2BF, HIST1H2AB, HIST1H2AC, HMGB2, HIST1H2AG, TSPYL1, SET, HIST1H4A, HIST1H4B, HJURP, NPM1, HIST1H4C, HIST1H4H, HIST1H2BB, HIST1H3J, HIST1H2BC, HIST1H2BD, HIST1H2BE, NASP, HIST2H3D, HIST1H3A, SUPT16H, HIS…	2426	93	13528	2.21851	0.0078498	7.09954e-05	0.00336397
	GOTERM_BP_FAT	GO:0043068~positive regulation of programmed cell death	117	3.98366	2.18331e-06	DLC1, ZAK, RBM5, EIF5A, RPS27L, PMAIP1, TGFB2, MAGED1, BAK1, APP, CD44, CDKN2C, PSENEN, RPL11, NGFRAP1, DAP, NQO1, RPS27A, NET1, BCL10, PTPRF, BCL2L13, STK4, DDIT3, MAPK1, UNC13D, TIAL1, MAPK9, MAPK8, UBA52, NGF, SIVA1, STK17B, BCL2L1, STK17A, SERINC3, TUBB, RAC1, MTCH1, DIABLO, DYRK2, CFLAR, ABR, TRIO, SMAD3, RPS6, TXNDC12, EI24, TNFSF10, UACA, CDKN1B, ETS1, HSPD1, PDCD5, PDCD6, DAP3, PDIA3, BNI…	2426	433	13528	1.50675	0.00955624	8.57302e-05	0.00409876
	GOTERM_BP_FAT	GO:0055114~oxidation reduction	161	5.48178	2.50829e-06	HCCS, LDHB, LDHA, GMPR2, HMGCR, NDUFAB1, OGDH, HIBADH, PDHB, FDFT1, UQCR10, UQCR11, IDH3G, ASPH, LOX, PDHA1, NQO1, HADH, NQO2, FTL, TXNL1, ALDH6A1, TECR, PYCR1, PYCR2, NNT, DLD, KDSR, MDH2, MDH1, HSD17B11, PAM, TMX1, HSD17B10, CYP1B1, TXN2, GLUD1, HSD17B12, FTH1, HADHA, COX6B1, IDH1, ERO1L, PTGR1, SCD, CYB561, IDH3A, UQCRHL, TXNDC12, LEPRE1, NXN, NDUFV1, NDUFV2, FOXRED1, DCXR, UQCRC2, CYB5R3, UQC…	2426	639	13528	1.40497	0.0109709	9.76189e-05	0.00470885
	GOTERM_BP_FAT	GO:0051656~establishment of organelle localization	30	1.02145	2.57269e-06	ARFGAP1, COPA, COPZ1, MLH1, CDC42, COPB2, PTK2, SEH1L, COPB1, NPM1, TMED10, PAFAH1B1, SNAP23, CDCA5, NUDC, STX5, MAP2K1, DLGAP5, SUN2, CENPF, NUSAP1, BIRC5, MYH9, UXT, ARF1, ARCN1, RPS15, YKT6, LRPPRC, COPE	2426	69	13528	2.42446	0.0112509	9.92467e-05	0.00482973
	GOTERM_BP_FAT	GO:0022618~ribonucleoprotein complex assembly	30	1.02145	2.57269e-06	NCBP2, EIF6, SNRPD3, RBM5, SNRPD1, SNRPD2, EIF2A, PRMT5, NPM1, GEMIN7, PRPF31, SNUPN, DDX1, RPL24, MBNL1, PRPF6, SF3A3, PHAX, PIH1D1, RPS14, RPS15, SNRNP200, SNRPB, SLU7, CELF1, SNRPC, SNRPF, SNRPE, SNRPG, TXNL4A	2426	69	13528	2.42446	0.0112509	9.92467e-05	0.00482973
	GOTERM_BP_FAT	GO:0006323~DNA packaging	43	1.46408	2.6476e-06	HIST4H4, HP1BP3, NAP1L1, HIST1H2BO, HIST2H2AB, HIST1H2BN, HIST1H2BK, H2AFV, HIST1H2BL, NAA10, HIST2H2AC, HIST1H2BJ, H2AFZ, SEP15, H2AFY, H2AFX, ACIN1, TOP2A, CDCA5, H1F0, HIST1H1E, HIST1H1C, AIFM1, NUSAP1, H2AFJ, NCAPD2, CHMP1A, HIST2H2BE, HIST2H2BF, HIST1H2AB, HIST1H2AC, HMGB2, HIST1H2AG, TSPYL1, SET, HIST1H4A, HIST1H4B, NCAPG, HJURP, NPM1, HIST1H4C, HIST1H4H, HIST1H2BB, HIST1H3J, HIST1H2BC, HIS…	2426	117	13528	2.04939	0.0115766	0.000101249	0.00497037
	GOTERM_BP_FAT	GO:0007010~cytoskeleton organization	117	3.98366	3.13416e-06	DLC1, HRAS, MAEA, PRC1, CAPZA2, CAPZA1, CNP, AURKA, CTNNB1, ACTG1, PACSIN2, RALA, TUBG1, PPP4C, PLS3, STMN3, ACTN4, RAN, ACTN1, TMSB10, TACC3, MYH9, DCTN2, ARPC1A, UXT, RND3, KRT19, SPAG5, ATP2C1, ZWINT, SDCBP, STMN1, ALDOA, CAV2, CAV1, AGFG1, SSH1, NEK2, NEDD9, ARF6, ARPC4, ANLN, ARPC5, CALR, RCC1, CAPZB, ITGB1, PFN1, PTK2, CDC42EP2, TUBB, RAC2, MACF1, RAC1, NPM1, ARHGDIB, CKAP5, ARFIP2, LASP1, …	2426	436	13528	1.49638	0.0136895	0.000118821	0.00588377
	GOTERM_BP_FAT	GO:0009144~purine nucleoside triphosphate metabolic process	44	1.49813	3.51127e-06	ALDOA, ATP5E, ATP6V0E1, ATP1B1, ATP5B, ATP6AP1, RP2, RHOQ, ATP5G2, ATP5G1, ATP6V1B2, ATP5G3, ATP6V0B, LONP1, ATP2B4, ATP5S, ATP5L, RAB11A, ATP5O, ATP5I, ATP5H, NDUFS1, ATP5J, ATP5J2, ATP5F1, AK3, OLA1, ACLY, NADK, ATP1A1, DGUOK, ATP13A3, ATP6V1D, ATP6V1F, NME6, ATP6V1C1, ATP6V1A, NME2, NME1-NME2, ATP2A2, NME1, ATP2C1, ADK, ATP6V1E1, ATP5C1, ATP5A1	2426	122	13528	2.01111	0.015324	0.000131979	0.00659169
	GOTERM_BP_FAT	GO:0006917~induction of apoptosis	91	3.0984	3.66162e-06	DLC1, BNIP3, EIF5A, MLH1, RPS27L, PMAIP1, DAXX, PRDX1, PTEN, RPS3, MAGED1, BAK1, GPX1, APP, CASP3, TP53I3, CASP4, RPS3A, CDKN2C, PCBP4, AEN, CASP8, PSENEN, RPL11, NGFRAP1, DAP, MYC, RPS27A, NET1, PPP2R1A, BCL10, AIFM1, TP53, NDUFA13, IFI16, ARHGEF12, BCL2L13, ECT2, MAPK1, UNC13D, TNFRSF10B, TIAL1, MAPK9, SORT1, MAPK8, UBB, UBA52, NGF, SIVA1, BID, BCLAF1, APH1A, STK17B, STK17A, SFN, ITM2B, SERINC3…	2426	320	13528	1.58575	0.0159748	0.000136464	0.00687392
	GOTERM_BP_FAT	GO:0051187~cofactor catabolic process	18	0.61287	3.95237e-06	DLST, SUCLG2, ACO1, PDHB, IDH3A, SDHA, KIAA0100, BLVRA, HMOX2, SDHB, NNT, IDH3G, SDHC, SDHD, IDH1, MDH2, MDH1, FH	2426	31	13528	3.23783	0.0172324	0.000146061	0.00741974
	GOTERM_BP_FAT	GO:0006084~acetyl-CoA metabolic process	18	0.61287	3.95237e-06	DLST, SUCLG2, ACO1, DLAT, PDHB, IDH3A, SDHA, KIAA0100, SDHB, NNT, IDH3G, SDHC, SDHD, DLD, IDH1, MDH2, MDH1, FH	2426	31	13528	3.23783	0.0172324	0.000146061	0.00741974
	GOTERM_BP_FAT	GO:0012502~induction of programmed cell death	91	3.0984	4.20944e-06	DLC1, BNIP3, EIF5A, MLH1, RPS27L, PMAIP1, DAXX, PRDX1, PTEN, RPS3, MAGED1, BAK1, GPX1, APP, CASP3, TP53I3, CASP4, RPS3A, CDKN2C, PCBP4, AEN, CASP8, PSENEN, RPL11, NGFRAP1, DAP, MYC, RPS27A, NET1, PPP2R1A, BCL10, AIFM1, TP53, NDUFA13, IFI16, ARHGEF12, BCL2L13, ECT2, MAPK1, UNC13D, TNFRSF10B, TIAL1, MAPK9, SORT1, MAPK8, UBB, UBA52, NGF, SIVA1, BID, BCLAF1, APH1A, STK17B, STK17A, SFN, ITM2B, SERINC3…	2426	321	13528	1.58081	0.0183428	0.000154264	0.00790231
	GOTERM_BP_FAT	GO:0009141~nucleoside triphosphate metabolic process	46	1.56622	4.62713e-06	ALDOA, ATP5E, ATP6V0E1, ATP1B1, ENPP1, ATP5B, ATP6AP1, RP2, DTYMK, RHOQ, ATP5G2, ATP5G1, ATP6V1B2, ATP5G3, ATP6V0B, LONP1, ATP2B4, ATP5S, ATP5L, RAB11A, ATP5O, ATP5I, ATP5H, NDUFS1, ATP5J, ATP5J2, ATP5F1, AK3, OLA1, ACLY, NADK, ATP1A1, DGUOK, ATP13A3, ATP6V1D, ATP6V1F, NME6, ATP6V1C1, ATP6V1A, NME2, NME1-NME2, ATP2A2, NME1, ATP2C1, ADK, ATP6V1E1, ATP5C1, ATP5A1	2426	131	13528	1.95808	0.0201445	0.000168169	0.0086864
	GOTERM_BP_FAT	GO:0043123~positive regulation of I-kappaB kinase/NF-kappaB cascade	37	1.25979	5.62389e-06	TMEM189-UBE2V1, VAPA, SLC20A1, LITAF, PPM1A, UBE2V1, TFG, FKBP1A, LPAR1, CANT1, TNFRSF1A, TMEM9B, MAP3K3, MIER1, SLC35B2, CASP8, TGM2, RHOA, TMEM101, RHOC, CFLAR, BCL10, LTBR, BST2, LGALS1, NDFIP1, CD40, BIRC2, ECT2, FLNA, UBE2N, C18ORF32, TNFSF10, TNFRSF10B, PLK2, ATP2C1, EEF1D, NEK6	2426	97	13528	2.12703	0.0244306	0.000202717	0.0105575
	GOTERM_BP_FAT	GO:0009260~ribonucleotide biosynthetic process	44	1.49813	5.67495e-06	ALDOA, ADSS, ATP5E, ATP6V0E1, ATP1B1, ATP5B, ATP6AP1, RP2, ATP5G2, ATP5G1, ATP6V1B2, ATP5G3, CMPK1, ATP6V0B, ATP2B4, ATP5S, ATP5L, ATP5O, ATP5I, ATP5H, IMPDH1, IMPDH2, ATP5J, ATP5J2, ATP5F1, AK3, ATP1A1, ATP13A3, ATP6V1D, GMPS, ATP6V1F, NME6, ATP6V1C1, ATP6V1A, NME2, NME1-NME2, ATP2A2, NME1, ATP2C1, ADK, ATP6V1E1, ATP5C1, ATP5A1, PAICS, PRPS2, PRPS1	2426	124	13528	1.97867	0.0246496	0.000202894	0.0106533
	GOTERM_BP_FAT	GO:0052547~regulation of peptidase activity	34	1.15764	5.95581e-06	DLC1, SIVA1, CAV1, PMAIP1, SFN, RPS3, GPX1, BAK1, MOAP1, CDKN2D, MTCH1, DIABLO, HSPE1, HSPA5, MYC, DHCR24, HERPUD1, CYCS, TP53, SMAD3, NRD1, BIRC5, BAD, STAT1, BCL2L13, UACA, TNFRSF10B, GSPT1, VCP, BAX, F3, CSTB, HSPD1, DNAJB6	2426	86	13528	2.20457	0.0258536	0.000211217	0.0111806
	GOTERM_BP_FAT	GO:0015992~proton transport	27	0.919305	6.16346e-06	ATP5E, ATP6V0E1, ATP5B, ATP6AP1, ATP5G2, ATP6V1B2, ATP6V1G1, ATP5G1, ATP5G3, ATP6V0B, ATP5S, ATP5L, ATP5O, ATP5I, ATP5H, ATP5J, ATP5J2, ATP5F1, ATP6V1D, ATP6V1F, ATP6V1C1, ATP6V1A, NNT, UCP2, ATP6V1E1, ATP5C1, ATP5A1	2426	61	13528	2.46818	0.0267429	0.000216832	0.0115704
	GOTERM_BP_FAT	GO:0007265~Ras protein signal transduction	39	1.32789	6.25569e-06	GNA13, HRAS, GRB2, MAPKAPK3, MAPKAPK2, RFXANK, RGL2, ARHGAP5, RALB, RHOA, RALA, RRAS, SHC1, RHOG, ARHGDIA, DHCR24, ARHGDIB, RSU1, ARHGEF1, MAP2K1, MAP2K2, G3BP1, YWHAB, G3BP2, RAF1, ARHGAP29, TAX1BP3, PARK7, MAPK1, NRAS, MAPK13, GNB1, MAPK14, RASSF1, RRAS2, MAPK3, CFL1, SDCBP, NGF	2426	105	13528	2.07118	0.0271376	0.00021833	0.0117435
	GOTERM_BP_FAT	GO:0009109~coenzyme catabolic process	16	0.544774	6.37246e-06	DLST, SUCLG2, ACO1, PDHB, IDH3A, KIAA0100, SDHA, SDHB, NNT, IDH3G, SDHC, SDHD, IDH1, MDH2, FH, MDH1	2426	26	13528	3.43154	0.0276371	0.000220654	0.0119627
	GOTERM_BP_FAT	GO:0009205~purine ribonucleoside triphosphate metabolic process	42	1.43003	6.91652e-06	ALDOA, ATP5E, ATP6V0E1, ATP1B1, ATP5B, ATP6AP1, RP2, RHOQ, ATP5G2, ATP5G1, ATP6V1B2, ATP5G3, ATP6V0B, LONP1, ATP2B4, ATP5S, ATP5L, RAB11A, ATP5O, ATP5I, ATP5H, NDUFS1, ATP5J, ATP5J2, ATP5F1, AK3, OLA1, ACLY, NADK, ATP1A1, ATP13A3, ATP6V1D, ATP6V1F, NME6, ATP6V1C1, ATP6V1A, NME2, NME1-NME2, ATP2A2, NME1, ATP2C1, ATP6V1E1, ATP5C1, ATP5A1	2426	117	13528	2.00173	0.029961	0.00023762	0.012984
	GOTERM_BP_FAT	GO:0043623~cellular protein complex assembly	53	1.80456	8.36724e-06	XPO1, COX11, XPO6, AP2S1, MLH1, NDUFAF3, NDUFS7, NDUFS5, PICALM, NDUFS4, GSN, NDUFS8, VMA21, TUBB6, TUBG1, TUBA1A, TUBA1B, KPNB1, TUBB3, TUBA1C, ARL2, HSP90AA1, IPO9, FLNA, ADRM1, ADRB2, PFDN6, TBCA, IPO7, NUP205, IPO5, TOMM22, CAV2, NUP98, CAV1, FKBP4, ARPC4, FKBP1A, ANLN, CALR, TFAM, PTK2, TUBB, CSE1L, RAC1, HSPA4, TNPO2, TNPO1, TCP1, SMAD3, CENPF, HSPD1, XPO7	2426	162	13528	1.82433	0.0361304	0.000285225	0.0157071
	GOTERM_BP_FAT	GO:0065004~protein-DNA complex assembly	35	1.19169	8.56766e-06	HIST4H4, HP1BP3, NAP1L1, HIST1H2BO, HIST2H2AB, HIST1H2BN, HIST1H2BK, H2AFV, HIST1H2BL, HIST2H2AC, HIST1H2BJ, GTF2A2, H2AFZ, H2AFY, H2AFX, H1F0, HIST1H1E, HIST1H1C, H2AFJ, HIST2H2BE, HIST2H2BF, HIST1H2AB, HIST1H2AC, HMGB2, HIST1H2AG, TSPYL1, SET, HIST1H4A, HIST1H4B, HJURP, NPM1, HIST1H4C, HIST1H4H, HIST1H2BB, HIST1H3J, HIST1H2BC, HIST1H2BD, HIST1H2BE, CENPF, HIST2H3D, HIST1H3A, HIST1H3B, HIST1H3C,…	2426	91	13528	2.14471	0.0369797	0.00028981	0.0160833
	GOTERM_BP_FAT	GO:0009199~ribonucleoside triphosphate metabolic process	42	1.43003	8.78551e-06	ALDOA, ATP5E, ATP6V0E1, ATP1B1, ATP5B, ATP6AP1, RP2, RHOQ, ATP5G2, ATP5G1, ATP6V1B2, ATP5G3, ATP6V0B, LONP1, ATP2B4, ATP5S, ATP5L, RAB11A, ATP5O, ATP5I, ATP5H, NDUFS1, ATP5J, ATP5J2, ATP5F1, AK3, OLA1, ACLY, NADK, ATP1A1, ATP13A3, ATP6V1D, ATP6V1F, NME6, ATP6V1C1, ATP6V1A, NME2, NME1-NME2, ATP2A2, NME1, ATP2C1, ATP6V1E1, ATP5C1, ATP5A1	2426	118	13528	1.98477	0.0379019	0.000294909	0.0164922
	GOTERM_BP_FAT	GO:0043066~negative regulation of apoptosis	97	3.30269	9.44584e-06	XRCC5, HRAS, MAEA, CITED2, CDKN2D, ILK, TPT1, DNAJC5, DDAH2, RPS27A, API5, EGFR, BCL10, SOCS3, AARS, PIM1, NME6, NME2, KRT18, NME1, TXNDC5, F3, VEGFA, HSPB1, MAPK8, UBA52, NGF, TMX1, HMGB1, MCL1, NFKBIA, PPT1, BCL2L1, CD74, PEA15, NPM1, TAF9, GLO1, ARHGDIA, CFLAR, BECN1, SMAD3, TAX1BP1, HDAC1, CFDP1, HSPD1, IER3, BNIP3, PRDX5, PRDX2, PRDX3, PTEN, AKT1, GPX1, CASP3, BAG1, CHST11, RHOA, CAT, MYC, D…	2426	354	13528	1.52796	0.0406919	0.00031467	0.0177317
	GOTERM_BP_FAT	GO:0019318~hexose metabolic process	60	2.0429	9.83437e-06	LDHB, PPARD, LDHA, IL6ST, PGAM1, OGDH, HIBADH, PDHB, AKT1, PDHA1, MYC, PFKL, PFKP, PFKM, PPP1CC, PPP1CB, PMM1, PGM2, PGM3, MAN2A1, PGLS, PGM1, UGP2, MDH2, SERP1, MDH1, ALDOA, SORD, TALDO1, FUT8, ADPGK, CREM, SLC37A4, G6PC3, GALK1, TPI1, PPP1R3B, AKR1A1, ENO2, GALE, PRKAA1, TSTA3, GAPDH, ENO1, AIMP1, BAD, DLAT, FUCA2, FUCA1, GPI, ATF4, GBE1, ATF3, PYGL, MAPK14, GFPT1, PGK1, POFUT1, DCXR, PYGB	2426	192	13528	1.74258	0.0423298	0.000322722	0.018461
	GOTERM_BP_FAT	GO:0006334~nucleosome assembly	33	1.1236	9.78827e-06	HIST1H2AB, HIST1H2AC, HMGB2, HIST4H4, HIST1H2AG, HP1BP3, NAP1L1, TSPYL1, HIST1H2BO, HIST2H2AB, SET, HIST1H2BN, HIST1H4A, H2AFV, HIST1H2BK, HJURP, HIST1H2BL, HIST1H4B, HIST2H2AC, HIST1H2BJ, NPM1, H2AFZ, H2AFY, H2AFX, HIST1H4C, HIST1H4H, H1F0, HIST1H3J, HIST1H2BB, HIST1H2BC, HIST1H1E, HIST1H2BD, HIST1H1C, HIST1H2BE, H2AFJ, HIST2H3D, HIST2H2BE, HIST2H2BF, HIST1H3A, HIST1H3B, H3F3A, HIST1H2AH, HIST1H…	2426	84	13528	2.19067	0.0421355	0.000323624	0.0183744
	GOTERM_BP_FAT	GO:0043069~negative regulation of programmed cell death	98	3.33674	1.00229e-05	XRCC5, HRAS, MAEA, CITED2, CDKN2D, ILK, TPT1, DNAJC5, DDAH2, RPS27A, API5, EGFR, BCL10, SOCS3, AARS, PIM1, NME6, NME2, KRT18, NME1, TXNDC5, F3, VEGFA, HSPB1, MAPK8, UBA52, NGF, TMX1, HMGB1, MCL1, NFKBIA, PPT1, BCL2L1, CD74, PEA15, NPM1, TAF9, GLO1, ARHGDIA, CFLAR, BECN1, SMAD3, TAX1BP1, PSMC5, HDAC1, CFDP1, HSPD1, IER3, BNIP3, PRDX5, PRDX2, PRDX3, PTEN, AKT1, GPX1, CASP3, BAG1, CHST11, RHOA, CAT,…	2426	359	13528	1.52221	0.0431237	0.000326473	0.0188149
	GOTERM_BP_FAT	GO:0043122~regulation of I-kappaB kinase/NF-kappaB cascade	39	1.32789	1.03956e-05	TMEM189-UBE2V1, VAPA, SLC20A1, LITAF, PPM1A, UBE2V1, TFG, FKBP1A, LPAR1, CANT1, TNFRSF1A, TMEM9B, MAP3K3, MIER1, SLC35B2, SQSTM1, CASP8, TGM2, RHOA, TMEM101, RHOC, BCL10, CFLAR, LTBR, BST2, C9ORF89, LGALS1, NDFIP1, CD40, BIRC2, ECT2, FLNA, UBE2N, C18ORF32, TNFSF10, TNFRSF10B, PLK2, ATP2C1, EEF1D, NEK6	2426	107	13528	2.03247	0.0446906	0.00033612	0.0195144
	GOTERM_BP_FAT	GO:0060548~negative regulation of cell death	98	3.33674	1.13498e-05	XRCC5, HRAS, MAEA, CITED2, CDKN2D, ILK, TPT1, DNAJC5, DDAH2, RPS27A, API5, EGFR, BCL10, SOCS3, AARS, PIM1, NME6, NME2, KRT18, NME1, TXNDC5, F3, VEGFA, HSPB1, MAPK8, UBA52, NGF, TMX1, HMGB1, MCL1, NFKBIA, PPT1, BCL2L1, CD74, PEA15, NPM1, TAF9, GLO1, ARHGDIA, CFLAR, BECN1, SMAD3, TAX1BP1, PSMC5, HDAC1, CFDP1, HSPD1, IER3, BNIP3, PRDX5, PRDX2, PRDX3, PTEN, AKT1, GPX1, CASP3, BAG1, CHST11, RHOA, CAT,…	2426	360	13528	1.51798	0.0486914	0.000364289	0.0213055
	GOTERM_BP_FAT	GO:0006818~hydrogen transport	27	0.919305	1.24727e-05	ATP5E, ATP6V0E1, ATP5B, ATP6AP1, ATP5G2, ATP6V1B2, ATP6V1G1, ATP5G1, ATP5G3, ATP6V0B, ATP5S, ATP5L, ATP5O, ATP5I, ATP5H, ATP5J, ATP5J2, ATP5F1, ATP6V1D, ATP6V1F, ATP6V1C1, ATP6V1A, NNT, UCP2, ATP6V1E1, ATP5C1, ATP5A1	2426	63	13528	2.38982	0.0533778	0.000397423	0.0234131
	GOTERM_BP_FAT	GO:0051493~regulation of cytoskeleton organization	46	1.56622	1.39884e-05	DLC1, CAV2, DYNC1LI1, XPO1, LIMA1, CAV1, PDGFA, CAPZA2, CAPZA1, RHOQ, ARF6, RDX, ARPC5, CAPZB, DSTN, CTNNB1, ACTR3, CDC42EP2, SBDS, MACF1, ARPC2, GSN, ILK, NPM1, RAC1, RHOA, RANBP1, SKA2, MLST8, RASA1, STMN3, MAP1B, SMAD3, TMSB10, MID1IP1, RICTOR, ARPC1A, ARPC1B, CDKN1B, CFL1, CAPG, SPTBN1, MAP4, TMSB4X, MAPRE1, SPTAN1	2426	136	13528	1.88609	0.0596673	0.000442503	0.0262579
	GOTERM_BP_FAT	GO:0008283~cell proliferation	114	3.88151	1.52432e-05	MORF4L1, XRCC5, TSPO, ZAK, PDGFA, DTYMK, FST, TGFB2, CTNNB1, BAK1, ILK, INSIG1, IL15RA, EGFR, PDXK, BST2, PIM1, NRD1, VTI1B, CD40, TACC3, DCTN2, PA2G4, GLUL, VEGFA, PELO, EMP1, TMX1, CDV3, GNAI2, HDGF, UBE2V2, FTH1, CD74, RPS27, CSE1L, RAC1, NUMB, NUDC, TFDP1, MAP2K1, SRA1, MET, ITGA2, GAS6, CD274, PCNA, HSPD1, COPS2, FGF5, PPARD, PRDX2, PTEN, PRDX1, KIF2C, GPX1, SBDS, BLZF1, MCM7, DKC1, CXCR4, P…	2426	436	13528	1.45801	0.0648424	0.000478744	0.0286131
	GOTERM_BP_FAT	GO:0006006~glucose metabolic process	50	1.70242	1.6121e-05	LDHB, LDHA, PPARD, IL6ST, PGAM1, OGDH, HIBADH, PDHB, AKT1, PDHA1, MYC, PFKL, PFKP, PFKM, PPP1CC, PPP1CB, PGM2, PGM3, PGLS, PGM1, UGP2, MDH2, MDH1, SERP1, ALDOA, SORD, TALDO1, ADPGK, CREM, SLC37A4, G6PC3, TPI1, PPP1R3B, AKR1A1, ENO2, PRKAA1, GAPDH, ENO1, AIMP1, DLAT, BAD, GPI, ATF4, GBE1, ATF3, PYGL, MAPK14, PGK1, DCXR, PYGB	2426	153	13528	1.82231	0.0684457	0.000499177	0.0302605
	GOTERM_BP_FAT	GO:0052548~regulation of endopeptidase activity	32	1.08955	1.60488e-05	DLC1, SIVA1, PMAIP1, SFN, RPS3, GPX1, BAK1, MOAP1, CDKN2D, MTCH1, DIABLO, HSPE1, HSPA5, MYC, DHCR24, HERPUD1, CYCS, TP53, SMAD3, NRD1, BIRC5, BAD, STAT1, BCL2L13, UACA, TNFRSF10B, VCP, GSPT1, BAX, F3, HSPD1, DNAJB6	2426	82	13528	2.1761	0.06815	0.000500466	0.0301251
	GOTERM_BP_FAT	GO:0046365~monosaccharide catabolic process	29	0.987402	1.63167e-05	ALDOA, LDHB, LDHA, GNPDA1, TALDO1, FUT8, ADPGK, PGAM1, OGDH, HIBADH, PDHB, TPI1, ENO2, GALE, PDHA1, GAPDH, ENO1, PFKL, NUDT5, PFKP, PFKM, DLAT, BAD, GPI, PGLS, PGM1, PGK1, MDH2, MDH1	2426	71	13528	2.27763	0.0692469	0.000501701	0.0306277
	GOTERM_BP_FAT	GO:0009152~purine ribonucleotide biosynthetic process	41	1.39598	1.7426e-05	ALDOA, ADSS, ATP5E, ATP6V0E1, ATP1B1, ATP5B, ATP6AP1, RP2, ATP5G2, ATP5G1, ATP6V1B2, ATP5G3, ATP6V0B, ATP2B4, ATP5S, ATP5L, ATP5O, ATP5I, ATP5H, IMPDH1, IMPDH2, ATP5J, ATP5J2, ATP5F1, AK3, ATP1A1, ATP13A3, ATP6V1D, GMPS, ATP6V1F, NME6, ATP6V1C1, ATP6V1A, NME2, NME1-NME2, ATP2A2, NME1, ATP2C1, ATP6V1E1, ATP5C1, ATP5A1, PAICS, PRPS1	2426	117	13528	1.95407	0.0737768	0.000532081	0.0327096
	GOTERM_BP_FAT	GO:0006367~transcription initiation from RNA polymerase II promoter	28	0.953354	1.9877e-05	POLR2H, POLR2G, POLR2F, POLR2E, POLR2L, POLR2K, POLR2J, POLR2I, POLR2C, POLR2B, GTF2E2, MAZ, GTF2A2, TAF9, ERCC2, CCNH, TAF7, GTF2H4, CDK9, GTF2H3, CDK7, GTF2B, TAF11, MNAT1, MED17, GTF2F1, THRAP3, GTF2F2	2426	68	13528	2.29611	0.0837076	0.000598586	0.0373095
	GOTERM_BP_FAT	GO:0043281~regulation of caspase activity	31	1.0555	1.97587e-05	DLC1, SIVA1, PMAIP1, SFN, RPS3, GPX1, BAK1, MOAP1, CDKN2D, MTCH1, DIABLO, HSPE1, HSPA5, MYC, DHCR24, HERPUD1, CYCS, TP53, SMAD3, BIRC5, BAD, STAT1, BCL2L13, UACA, TNFRSF10B, VCP, GSPT1, BAX, F3, HSPD1, DNAJB6	2426	79	13528	2.18815	0.0832308	0.000599128	0.0370875
	GOTERM_BP_FAT	GO:0009142~nucleoside triphosphate biosynthetic process	37	1.25979	2.05676e-05	ALDOA, ATP5E, ATP6V0E1, ATP1B1, ATP5B, RP2, ATP6AP1, DTYMK, ATP5G2, ATP5G1, ATP6V1B2, ATP5G3, ATP6V0B, ATP2B4, ATP5S, ATP5L, ATP5O, ATP5I, ATP5H, ATP5J, ATP5J2, ATP5F1, AK3, ATP1A1, ATP13A3, ATP6V1D, ATP6V1F, NME6, ATP6V1C1, ATP6V1A, NME2, NME1-NME2, ATP2A2, NME1, ATP2C1, ATP6V1E1, ADK, ATP5C1, ATP5A1	2426	102	13528	2.02276	0.0864867	0.000615167	0.0386056
	GOTERM_BP_FAT	GO:0051129~negative regulation of cellular component organization	47	1.60027	2.08886e-05	DLC1, RTN4, HMGB1, LIMA1, NRP1, AURKAIP1, CAPZA2, CAPZA1, RHOQ, ARF6, RDX, CAPZB, PTEN, TTC3, MBP, NR1H2, CDC42, PTK2, SBDS, SET, PACSIN2, GSN, NPM1, RAC1, BUB1, RHOA, THBS1, TPR, ERCC1, ARHGDIA, ARHGEF1, PTPRF, MAP1B, TAF7, CENPF, TMSB10, MID1IP1, MMP14, MAD2L1, YWHAH, CAPG, SPTBN1, MAP4, TMSB4X, MAPRE1, MAD2L2, SPTAN1	2426	142	13528	1.84566	0.0877752	0.000620543	0.0392079
	GOTERM_BP_FAT	GO:0031497~chromatin assembly	33	1.1236	2.26025e-05	HIST1H2AB, HIST1H2AC, HMGB2, HIST4H4, HIST1H2AG, HP1BP3, NAP1L1, TSPYL1, HIST1H2BO, HIST2H2AB, SET, HIST1H2BN, HIST1H4A, H2AFV, HIST1H2BK, HJURP, HIST1H2BL, HIST1H4B, HIST2H2AC, HIST1H2BJ, NPM1, H2AFZ, H2AFY, H2AFX, HIST1H4C, HIST1H4H, H1F0, HIST1H3J, HIST1H2BB, HIST1H2BC, HIST1H1E, HIST1H2BD, HIST1H1C, HIST1H2BE, H2AFJ, HIST2H3D, HIST2H2BE, HIST2H2BF, HIST1H3A, HIST1H3B, H3F3A, HIST1H2AH, HIST1H…	2426	87	13528	2.11513	0.0946257	0.000666938	0.0424244
	GOTERM_BP_FAT	GO:0006613~cotranslational protein targeting to membrane	10	0.340483	2.45715e-05	ARL6IP1, SRP14, SRPR, SRP72, TRAM1, SEC62, SSR2, SRP9, SSR1, SSR3	2426	12	13528	4.64688	0.102433	0.000720187	0.0461194
	GOTERM_BP_FAT	GO:0000059~protein import into nucleus, docking	12	0.40858	2.56219e-05	XPO1, NUP98, XPO6, CSE1L, IPO7, NUP205, IPO5, IPO9, TNPO2, XPO7, KPNB1, TNPO1	2426	17	13528	3.93618	0.106569	0.000736241	0.0480904
	GOTERM_BP_FAT	GO:0006007~glucose catabolic process	25	0.851209	2.53262e-05	ALDOA, LDHB, LDHA, TALDO1, ADPGK, PGAM1, OGDH, HIBADH, PDHB, TPI1, ENO2, PDHA1, GAPDH, ENO1, PFKL, PFKP, PFKM, DLAT, BAD, GPI, PGLS, PGM1, PGK1, MDH2, MDH1	2426	58	13528	2.40356	0.105407	0.000737383	0.0475355
	GOTERM_BP_FAT	GO:0009145~purine nucleoside triphosphate biosynthetic process	36	1.22574	2.55791e-05	ALDOA, ATP5E, ATP6V0E1, ATP1B1, ATP5B, RP2, ATP6AP1, ATP5G2, ATP5G1, ATP6V1B2, ATP5G3, ATP6V0B, ATP2B4, ATP5S, ATP5L, ATP5O, ATP5I, ATP5H, ATP5J, ATP5J2, ATP5F1, AK3, ATP1A1, ATP13A3, ATP6V1D, ATP6V1F, NME6, ATP6V1C1, ATP6V1A, NME2, NME1-NME2, ATP2A2, NME1, ATP2C1, ATP6V1E1, ADK, ATP5C1, ATP5A1	2426	99	13528	2.02773	0.106401	0.000739846	0.0480101
	GOTERM_BP_FAT	GO:0006979~response to oxidative stress	52	1.77051	2.68944e-05	MICB, ATOX1, ROMO1, PRDX5, PDLIM1, PRDX2, PRDX3, PRDX1, GSS, FOS, HMOX2, GPX1, LONP1, NDUFS8, GPX3, SERPINE1, CAT, NQO1, NDUFS2, DHCR24, ADAM9, EGFR, STK25, MMP14, NDUFA12, DDIT3, PYCR1, HIF1A, PRDX6, PEBP1, PPP1R15B, PRNP, NDUFB4, TXN2, ADRBK1, BCL2L1, GLRX2, PSMB5, TOR1A, PPP2CB, IDH1, ERCC1, ERCC2, TXNIP, MAP2K1, SELK, OXSR1, SOD1, STAT1, PARK7, SOD2, UCP2	2426	164	13528	1.76808	0.111556	0.000767777	0.0504782
	GOTERM_BP_FAT	GO:0051170~nuclear import	33	1.1236	2.94797e-05	XPO1, NUP98, PDIA3, XPO6, ATP6AP1, NFKBIA, TGFB2, AKT1, CSE1L, TPR, TNPO2, TNPO1, KPNB1, RAN, SNUPN, TP53, NDUFA13, IPO9, HNRNPA1, MAPK1, PPIH, SEC61B, RPAIN, RPL23, IPO7, NUP205, IPO5, PTTG1IP, SPTBN1, NUTF2, KPNA4, XPO7, KPNA2	2426	88	13528	2.0911	0.1216	0.000836125	0.0553293
	GOTERM_BP_FAT	GO:0032446~protein modification by small protein conjugation	44	1.49813	3.29472e-05	TMEM189-UBE2V1, TSG101, UBE2V1, SAE1, NEDD8, UBE2V2, CDC34, ANAPC11, UBE3C, STUB1, RBX1, AKT1, SUMO3, SUMO2, SUMO1, UBE2D3, UBE2D2, RNF11, TRAF7, NEDD4L, FBXW11, RPS27A, TRIP12, UBE2A, DDB1, PCNP, UBE2H, UBE2L3, UBE2C, TSPAN17, UBE2B, UBE2N, RNF8, NOSIP, GSPT1, HUWE1, VCP, UBE2M, UBA3, FBXL5, CAND1, USP22, UBB, UBA52, UBE2E1, RNF41	2426	132	13528	1.85875	0.134895	0.00092844	0.0618354
	GOTERM_BP_FAT	GO:0051186~cofactor metabolic process	59	2.00885	3.37968e-05	NAMPT, LDHB, TSPO, HMGCR, PNP, HIBADH, PDHB, ACOT9, MTHFD1, GSS, HMOX2, GPX1, TP53I3, ALAS1, ACOT8, IDH3G, GPX3, PDXK, SUCLG2, ACO1, HMBS, NADSYN1, COQ9, KIAA0100, HAGH, ISCU, PGLS, NNT, PANK3, ISCA2, DLD, NFE2L1, UROD, MDH2, MDH1, TALDO1, PPT1, GLRX2, TPI1, CBR1, IDH1, GLO1, FH, DCAKD, DLST, MOCS2, NADK, ACLY, DLAT, SOD1, IDH3A, SOD2, SDHA, BLVRA, SDHB, SDHC, SDHD, DCXR, MGST1	2426	195	13528	1.68718	0.138121	0.000940322	0.0634295
	GOTERM_BP_FAT	GO:0018279~protein amino acid N-linked glycosylation via asparagine	9	0.306435	3.3635e-05	STT3B, MGAT2, OSTC, MAGT1, STT3A, DAD1, RPN1, RPN2, DDOST	2426	10	13528	5.01863	0.137508	0.000941781	0.063126
	GOTERM_BP_FAT	GO:0042273~ribosomal large subunit biogenesis	9	0.306435	3.3635e-05	RPL35A, RPL14, RPL7, NPM1, RPL26, RPL5, RPL11, RPL24, PES1	2426	10	13528	5.01863	0.137508	0.000941781	0.063126
	GOTERM_BP_FAT	GO:0018196~peptidyl-asparagine modification	9	0.306435	3.3635e-05	STT3B, MGAT2, OSTC, MAGT1, STT3A, DAD1, RPN1, RPN2, DDOST	2426	10	13528	5.01863	0.137508	0.000941781	0.063126
	GOTERM_BP_FAT	GO:0046164~alcohol catabolic process	31	1.0555	3.46125e-05	ALDOA, LDHB, LDHA, GNPDA1, TALDO1, SORD, FUT8, ADPGK, PGAM1, COMT, OGDH, HIBADH, PDHB, TPI1, ENO2, GALE, PDHA1, GAPDH, ENO1, PFKL, NUDT5, PFKP, BAD, PFKM, DLAT, GPI, PGLS, PGM1, PGK1, MDH2, MDH1	2426	81	13528	2.13412	0.141208	0.000956953	0.06496
	GOTERM_BP_FAT	GO:0007006~mitochondrial membrane organization	17	0.578822	3.53127e-05	BID, OPA1, HSP90AA1, TP53, TIMM10, BNIP3, TIMM13, BCL2L1, MFN2, PPIF, BAK1, LETM1, SH3GLB1, BAX, TIMM9, TOMM22, HSPA4	2426	32	13528	2.96239	0.143849	0.000970204	0.0662737
	GOTERM_BP_FAT	GO:0006997~nucleus organization	23	0.783112	3.62261e-05	NUP98, AIFM1, CYCS, LMNA, SUN2, BNIP3, NDUFA13, PPT1, SOD1, TXNDC12, NUMA1, CASP3, MOAP1, SEH1L, ETS1, BAX, SEP15, PAFAH1B1, ACIN1, PES1, TOP2A, EMD, MYC	2426	52	13528	2.46642	0.147281	0.00098911	0.0679874
	GOTERM_BP_FAT	GO:0044275~cellular carbohydrate catabolic process	32	1.08955	3.65559e-05	ALDOA, LDHB, LDHA, GNPDA1, TALDO1, SORD, FUT8, ADPGK, PGAM1, OGDH, HIBADH, PDHB, TPI1, ENO2, GALE, PDHA1, GAPDH, ENO1, PFKL, NUDT5, PFKP, BAD, PFKM, DLAT, GPI, PGLS, PYGL, PGM1, PGK1, MDH2, MDH1, PYGB	2426	85	13528	2.0993	0.148517	0.000991951	0.0686061
	GOTERM_BP_FAT	GO:0005996~monosaccharide metabolic process	65	2.21314	3.96258e-05	LDHB, PPARD, LDHA, GNPDA1, IL6ST, HEXB, PGAM1, OGDH, PDHB, HIBADH, AKT1, PDHA1, MYC, PFKL, NUDT5, PFKP, PFKM, PPP1CC, PPP1CB, PMM1, PGM2, MAN2A1, PGM3, PGLS, PGM1, UGP2, MDH2, SERP1, PRPS1, MDH1, ALDOA, SORD, TALDO1, FUT8, ADPGK, CREM, SLC37A4, G6PC3, GALK1, TPI1, PPP1R3B, AKR1A1, ENO2, GALE, PRKAA1, TSTA3, GAPDH, ENO1, UAP1, AIMP1, BAD, DLAT, FUCA2, FUCA1, GPI, ATF4, ATF3, GBE1, PYGL, MAPK14, GF…	2426	222	13528	1.63269	0.159936	0.00106862	0.0743654
	GOTERM_BP_FAT	GO:0046034~ATP metabolic process	37	1.25979	4.20083e-05	ALDOA, ATP5E, ATP6V0E1, ATP1B1, ATP5B, ATP6AP1, ATP5G2, ATP5G1, ATP6V1B2, ATP5G3, ATP6V0B, LONP1, ATP2B4, ATP5S, ATP5L, ATP5O, ATP5I, ATP5H, NDUFS1, ATP5J, ATP5J2, ATP5F1, AK3, OLA1, ACLY, NADK, ATP1A1, ATP13A3, ATP6V1D, ATP6V1F, ATP6V1C1, ATP6V1A, ATP2A2, ATP2C1, ATP6V1E1, ATP5C1, ATP5A1	2426	105	13528	1.96497	0.168693	0.00111911	0.0788351
	GOTERM_BP_FAT	GO:0032535~regulation of cellular component size	76	2.58767	4.17818e-05	RTN4, LIMA1, ATP6V0E1, NRP1, CCDC85B, CAPZA2, PPARG, CAPZA1, TGFB2, LUZP6, DSTN, AKT1, ACTR3, APP, ARHGAP5, GSN, CDKN2C, CDKN2D, ILK, SERTAD3, MLST8, SERTAD2, PPP2R1A, ADAM10, TP53, SLC3A2, NDUFA13, ADIPOR1, TMSB10, SOCS5, CDK4, VAT1, ARPC1A, ARPC1B, BTG1, CFL1, TMSB4X, EMP3, EMP1, NGF, DCBLD2, FGFR1, EXTL3, DERL2, ENPP1, TNFRSF12A, PPT1, RDX, ARF6, ARPC5, SFN, CCNG1, CAPZB, CDC42EP2, LAMB2, ARPC…	2426	271	13528	1.56382	0.167865	0.00111986	0.0784101
	GOTERM_BP_FAT	GO:0034220~ion transmembrane transport	22	0.749064	4.30214e-05	ATP5E, ATP6V0E1, ATP5B, ATP6AP1, ATP5F1, ATP5G2, ATP6V1B2, ATP5G1, ATP5G3, ATP6V1D, ATP6V0B, ATP6V1F, ATP6V1C1, ATP6V1A, ATP6V1E1, ATP5C1, ATP5L, ATP5O, ATP5A1, ATP5I, ATP5H, ATP5J	2426	49	13528	2.50363	0.172389	0.00113918	0.0807356
	GOTERM_BP_FAT	GO:0006606~protein import into nucleus	32	1.08955	4.7456e-05	XPO1, NUP98, PDIA3, XPO6, ATP6AP1, NFKBIA, TGFB2, AKT1, CSE1L, TPR, TNPO2, TNPO1, KPNB1, RAN, SNUPN, TP53, NDUFA13, IPO9, MAPK1, PPIH, SEC61B, RPAIN, RPL23, IPO7, NUP205, IPO5, PTTG1IP, SPTBN1, NUTF2, KPNA4, XPO7, KPNA2	2426	86	13528	2.07489	0.188375	0.00124902	0.0890542
	GOTERM_BP_FAT	GO:0006916~anti-apoptosis	61	2.07695	4.92218e-05	IER3, BNIP3, PRDX2, CITED2, AKT1, GPX1, BAG1, CDKN2D, TPT1, DDAH2, MYC, API5, RPS27A, DHCR24, IRAK1, CDK1, SOCS3, PRKCI, NME6, SERPINB9, TNFRSF10D, TXNDC5, F3, CFL1, VEGFA, HSPB1, UBB, PRNP, GSTP1, UBA52, NGF, TMX1, HMGB1, YWHAZ, MCL1, NFKBIA, BCL2L1, PEA15, SQSTM1, SH3GLB1, NPM1, DAD1, TGM2, GLO1, HSPA5, THBS1, ARHGDIA, HSPA9, STAMBP, CFLAR, BECN1, ANXA1, BIRC5, ANXA5, SOD1, TAX1BP1, SOD2, HSP90…	2426	206	13528	1.65122	0.194654	0.00128776	0.0923663
	GOTERM_BP_FAT	GO:0009206~purine ribonucleoside triphosphate biosynthetic process	35	1.19169	5.16491e-05	ALDOA, ATP5E, ATP6V0E1, ATP1B1, ATP5B, RP2, ATP6AP1, ATP5G2, ATP5G1, ATP6V1B2, ATP5G3, ATP6V0B, ATP2B4, ATP5S, ATP5L, ATP5O, ATP5I, ATP5H, ATP5J, ATP5J2, ATP5F1, AK3, ATP1A1, ATP13A3, ATP6V1D, ATP6V1F, NME6, ATP6V1C1, ATP6V1A, NME2, NME1-NME2, ATP2A2, NME1, ATP2C1, ATP6V1E1, ATP5C1, ATP5A1	2426	98	13528	1.99152	0.203206	0.00133534	0.0969192
	GOTERM_BP_FAT	GO:0022411~cellular component disassembly	23	0.783112	5.15303e-05	AIFM1, CYCS, BNIP3, PPT1, PMAIP1, SOD1, ETF1, HMGA1, TXNDC12, KIF2C, CASP3, MOAP1, MAZ, SET, PTRF, SMARCE1, ICT1, BAX, SUPT16H, PAFAH1B1, STMN1, LAMC1, MYC	2426	53	13528	2.41989	0.202789	0.00134014	0.0966963
	GOTERM_BP_FAT	GO:0006913~nucleocytoplasmic transport	49	1.66837	6.16421e-05	NCBP2, XPO1, XPO6, PDIA3, XPO5, ATP6AP1, EIF5A, TGFB2, AKT1, ANP32A, TPR, KPNB1, RAN, SNUPN, TP53, NDUFA13, IPO9, MAPK1, RPAIN, SEC61B, IPO7, NUP205, RPS15, IPO5, THOC6, THOC7, KPNA4, KPNA2, NXT1, NUP98, AGFG1, NFKBIA, CALR, SET, CSE1L, NPM1, TNPO2, TNPO1, HSPA9, XPOT, HNRNPA1, PHAX, PPIH, RPL23, MLX, PTTG1IP, SPTBN1, NUTF2, XPO7	2426	156	13528	1.75152	0.237468	0.00158419	0.115661
	GOTERM_BP_FAT	GO:0006890~retrograde vesicle-mediated transport, Golgi to ER	13	0.442629	6.30986e-05	ARFGAP1, COPA, COPZ1, RER1, TAPBP, KIF1C, COPB2, SCFD1, SCYL1, ARF1, COPB1, ARCN1, COPE	2426	21	13528	3.45197	0.242337	0.00161217	0.118392
	GOTERM_BP_FAT	GO:0009201~ribonucleoside triphosphate biosynthetic process	35	1.19169	6.52858e-05	ALDOA, ATP5E, ATP6V0E1, ATP1B1, ATP5B, RP2, ATP6AP1, ATP5G2, ATP5G1, ATP6V1B2, ATP5G3, ATP6V0B, ATP2B4, ATP5S, ATP5L, ATP5O, ATP5I, ATP5H, ATP5J, ATP5J2, ATP5F1, AK3, ATP1A1, ATP13A3, ATP6V1D, ATP6V1F, NME6, ATP6V1C1, ATP6V1A, NME2, NME1-NME2, ATP2A2, NME1, ATP2C1, ATP6V1E1, ATP5C1, ATP5A1	2426	99	13528	1.9714	0.249591	0.00165837	0.122493
	GOTERM_BP_FAT	GO:0010033~response to organic substance	170	5.78822	7.2601e-05	MMS19, IL6ST, VAPB, PDGFA, RBM3, RBM4, AURKA, PMAIP1, CTNNB1, TGFB2, B2M, GSTM3, CD44, ATF6B, PRKACA, LOX, DDAH2, EIF2B2, SUPT5H, DDOST, CCNA2, GNG5, EIF2B5, ADAM9, EGFR, BCL10, BSG, SOCS3, AARS, IRS1, DDIT3, JUNB, MAPK1, NME2, GLUL, KRT19, NME1, HSPB1, NFE2L2, NGF, CAV2, DERL2, HMGB2, CAV1, CYP1B1, PANX1, ENPP1, MCL1, TXN2, GRB2, HMGCS1, NFKBIA, NEDD8, ADRBK1, BCL2L1, SERPINH1, MANF, TTC3, DNAJA…	2426	721	13528	1.31479	0.27335	0.00182297	0.13621
	GOTERM_BP_FAT	GO:0000079~regulation of cyclin-dependent protein kinase activity	23	0.783112	7.23576e-05	EGFR, CKS1B, GTPBP4, PIM1, BCCIP, CDK7, SFN, CCNG1, CDKN3, PPP1CB, PTEN, CDC37, AKT1, MNAT1, CCND1, CASP3, CDKN1B, CDKN2C, HEXIM1, CDKN2D, CKS2, CDK5RAP3, GADD45A	2426	54	13528	2.37507	0.272572	0.00182729	0.135753
	GOTERM_BP_FAT	GO:0006096~glycolysis	21	0.715015	7.36202e-05	ALDOA, LDHB, LDHA, PFKL, ADPGK, PGAM1, PFKP, PFKM, DLAT, OGDH, PDHB, GPI, TPI1, PGM1, ENO2, PDHA1, PGK1, GAPDH, MDH2, MDH1, ENO1	2426	47	13528	2.49152	0.2766	0.00183805	0.138121
	GOTERM_BP_FAT	GO:0034470~ncRNA processing	56	1.90671	7.46282e-05	RPL14, GAR1, LSM6, SBDS, WDR36, DKC1, RPL11, FTSJ1, DUS1L, RPL35A, EXOSC9, RPP21, EXOSC7, SARS, AARS, EXOSC5, EXOSC2, EXOSC3, EIF4A3, PA2G4, RPS19, RPS16, RPS14, RPS15, TRUB2, NHP2, CPSF3L, HSD17B10, ELAC2, TYW3, ERI1, TRPT1, FCF1, RPS28, WDR55, RPL7, RPL5, KIAA0391, NSA2, RPS24, UTP23, RPL26, SMAD3, SSB, RPS6, NOP10, RPF1, FBL, RPS7, URM1, DDX56, NOLC1, POP4, NOP56, PES1, POP7	2426	187	13528	1.6699	0.279801	0.00185267	0.140011
	GOTERM_BP_FAT	GO:0006732~coenzyme metabolic process	48	1.63432	7.64955e-05	NAMPT, LDHB, TALDO1, HMGCR, PNP, PDHB, HIBADH, GLRX2, ACOT9, MTHFD1, GSS, GPX1, TP53I3, TPI1, IDH3G, ACOT8, GPX3, IDH1, GLO1, FH, DCAKD, DLST, MOCS2, PDXK, ACO1, SUCLG2, NADSYN1, ACLY, NADK, COQ9, DLAT, SOD1, IDH3A, SOD2, SDHA, HAGH, KIAA0100, SDHB, PGLS, NNT, PANK3, SDHC, SDHD, DLD, DCXR, MDH2, MGST1, MDH1	2426	153	13528	1.74941	0.285691	0.00188833	0.143512
	GOTERM_BP_FAT	GO:0051640~organelle localization	33	1.1236	8.02167e-05	ARFGAP1, COPA, MLPH, COPZ1, MLH1, CDC42, COPB2, PTK2, SEH1L, COPB1, NPM1, TMED10, PAFAH1B1, SNAP23, CDCA5, NUDC, STX5, MAP2K1, DLGAP5, SUN2, CENPF, NUSAP1, BIRC5, MYH9, TACC3, MFN2, UXT, ARF1, ARCN1, RPS15, YKT6, LRPPRC, COPE	2426	92	13528	2.00018	0.297287	0.00196905	0.150488
	GOTERM_BP_FAT	GO:0019320~hexose catabolic process	27	0.919305	8.07728e-05	ALDOA, LDHB, LDHA, TALDO1, FUT8, ADPGK, PGAM1, OGDH, HIBADH, PDHB, TPI1, ENO2, GALE, PDHA1, GAPDH, ENO1, PFKL, PFKP, PFKM, DLAT, BAD, GPI, PGLS, PGM1, PGK1, MDH2, MDH1	2426	69	13528	2.18201	0.299004	0.00197168	0.15153
	GOTERM_BP_FAT	GO:0010035~response to inorganic substance	60	2.0429	8.20812e-05	IMPA1, SEC31A, PDGFA, ALG2, PRDX5, ROMO1, PRDX2, PRDX3, PRDX1, PTEN, CTNNB1, ACTG1, GSS, FOS, GPX1, GSN, GPX3, SERPINE1, SERPINA1, CAT, ADAM9, CUTA, EGFR, BSG, STIM1, DDIT3, NPC1, CCND1, PRDX6, CYBRD1, PEBP1, MAPK9, MAPK8, PRNP, PPP1R15B, CAV1, ADRBK1, BCL2L1, GLRX2, PEF1, PPP2CB, NEDD4L, THBS1, TXNIP, ACTB, S100A16, MAP1B, ITPR3, SOD1, STAT1, PARK7, MT1X, SOD2, MNAT1, TFRC, UCP2, ANXA11, CALM3, …	2426	205	13528	1.63208	0.303026	0.00199253	0.153983
	GOTERM_BP_FAT	GO:0051169~nuclear transport	49	1.66837	8.75945e-05	NCBP2, XPO1, XPO6, PDIA3, XPO5, ATP6AP1, EIF5A, TGFB2, AKT1, ANP32A, TPR, KPNB1, RAN, SNUPN, TP53, NDUFA13, IPO9, MAPK1, RPAIN, SEC61B, IPO7, NUP205, RPS15, IPO5, THOC6, THOC7, KPNA4, KPNA2, NXT1, NUP98, AGFG1, NFKBIA, CALR, SET, CSE1L, NPM1, TNPO2, TNPO1, HSPA9, XPOT, HNRNPA1, PHAX, PPIH, RPL23, MLX, PTTG1IP, SPTBN1, NUTF2, XPO7	2426	158	13528	1.72935	0.319724	0.00211456	0.164318
	GOTERM_BP_FAT	GO:0007059~chromosome segregation	30	1.02145	9.47188e-05	KIFC1, NEK2, USP9X, MLH1, PTTG1, RAD21, SEH1L, NCAPG, HJURP, SKA2, CDCA5, TOP2A, STAG2, BUB3, DSN1, DLGAP5, NUF2, CENPF, NUSAP1, UBE2I, BIRC5, PMF1, SRPK1, NCAPD2, CHMP1A, MAD2L1, ZWINT, ARL8A, ARL8B, NEK6	2426	81	13528	2.06528	0.340711	0.00227388	0.177671
	GOTERM_BP_FAT	GO:0006754~ATP biosynthetic process	32	1.08955	9.99953e-05	ALDOA, ATP5E, ATP6V0E1, ATP1B1, ATP5B, ATP6AP1, ATP5G2, ATP6V1B2, ATP5G1, ATP5G3, ATP6V0B, ATP2B4, ATP5S, ATP5L, ATP5O, ATP5I, ATP5H, ATP5J, ATP5J2, ATP5F1, AK3, ATP1A1, ATP13A3, ATP6V1D, ATP6V1F, ATP6V1C1, ATP6V1A, ATP2A2, ATP2C1, ATP6V1E1, ATP5C1, ATP5A1	2426	89	13528	2.00495	0.355836	0.00238737	0.18756
	GOTERM_BP_FAT	GO:0016052~carbohydrate catabolic process	37	1.25979	0.000101762	ALDOA, LDHB, LDHA, SORD, TALDO1, GNPDA1, FUT8, ADPGK, HEXB, PGAM1, OGDH, HIBADH, PDHB, TPI1, AKR1A1, ENO2, GALE, PDHA1, GAPDH, ENO1, PFKL, NUDT5, PFKP, BAD, DLAT, PFKM, FUCA1, GNS, GPI, PGLS, CHID1, PYGL, PGM1, PGK1, MDH2, MDH1, PYGB	2426	109	13528	1.89286	0.360821	0.00241638	0.19087
	GOTERM_BP_FAT	GO:0006446~regulation of translational initiation	19	0.646919	0.000102776	NCBP2, PAIP2, EIF5, DDX1, EIF4G1, EIF4B, EIF4G2, EIF2AK1, EIF3B, EIF3H, EIF2S1, EIF4A2, EIF3E, EIF4H, EIF3K, HSPB1, EIF1, EIF2B2, EIF2B5	2426	41	13528	2.58412	0.363668	0.00242734	0.192772
	GOTERM_BP_FAT	GO:0042274~ribosomal small subunit biogenesis	9	0.306435	0.000103822	RPS28, RPS19, RPS16, RPS14, RPS15, NPM1, RPS6, RPS7, RPS24	2426	11	13528	4.56239	0.366587	0.00243891	0.194731
	GOTERM_BP_FAT	GO:0000226~microtubule cytoskeleton organization	46	1.56622	0.000117789	HAUS4, CAV2, CAV1, PRC1, NEK2, CETN3, CETN2, MLH1, CNP, ARPC4, AURKA, RCC1, CTNNB1, KIF2C, PTK2, TUBB, MACF1, SEH1L, NPM1, PAFAH1B1, RANBP1, TUBG1, DYNC1H1, PPP4C, TUBA1B, STMN3, CKAP5, RAN, MAP1B, SUN2, NUSAP1, MYH9, UBE2C, TACC3, TUBGCP2, UBE2B, GABARAP, DCTN2, UXT, SS18, SPAG5, ZWINT, CKS2, HAUS7, STMN1, GADD45A	2426	147	13528	1.74495	0.404328	0.00275188	0.2209
	GOTERM_BP_FAT	GO:0070647~protein modification by small protein conjugation or removal	49	1.66837	0.000123136	ENY2, COPS5, TMEM189-UBE2V1, TSG101, SAE1, AKT1, RPS27A, UBE2A, DDB1, UBE2H, UBE2C, UBE2B, UBE2N, HUWE1, UBE2M, FBXL5, CAND1, USP22, UBB, UBA52, SUPT3H, USP9X, UBE2V1, UBE2V2, NEDD8, CDC34, UBE3C, ANAPC11, STUB1, RBX1, SUMO3, SUMO2, UBE2D3, SUMO1, UBE2D2, RNF11, TRAF7, NEDD4L, FBXW11, TRIP12, PCNP, UBE2L3, TSPAN17, RNF8, PSMD14, NOSIP, GSPT1, VCP, UBA3, RNF41, UBE2E1	2426	160	13528	1.70773	0.418174	0.00286142	0.230916
	GOTERM_BP_FAT	GO:0007051~spindle organization	20	0.680967	0.00012588	HAUS4, PRC1, RAN, SUN2, MLH1, AURKA, MYH9, TACC3, UBE2C, RCC1, DCTN2, TUBB, SPAG5, ZWINT, CKS2, HAUS7, RANBP1, TUBG1, STMN1, DYNC1H1	2426	45	13528	2.47834	0.425155	0.00289452	0.236057
	GOTERM_BP_FAT	GO:0006163~purine nucleotide metabolic process	55	1.87266	0.000125693	ATP5E, ATP6V0E1, ATP1B1, ATP6AP1, RP2, ATP5B, RHOQ, MTHFD1, LONP1, ATP2B4, ATP5S, ATP5L, ATP5O, ATP5I, NT5E, ATP5H, IMPDH1, NDUFS1, IMPDH2, ATP5J, OLA1, PDE4D, DGUOK, ATP6V1D, GMPS, ATP6V1F, NME6, ATP6V1C1, ATP6V1A, NME2, NME1, ATP2C1, ADK, ATP5C1, PRPS1, ALDOA, ADSS, ENPP1, ATP5G2, ATP5G1, ATP6V1B2, ATP5G3, ATP6V0B, RAB11A, ATP5J2, ATP5F1, AK3, NADK, ATP1A1, ACLY, ATP13A3, NME1-NME2, ATP2A2, ATP…	2426	186	13528	1.64889	0.424681	0.00290541	0.235706
	GOTERM_BP_FAT	GO:0034504~protein localization in nucleus	33	1.1236	0.00012783	XPO1, NUP98, PDIA3, XPO6, ATP6AP1, NFKBIA, TGFB2, AKT1, CSE1L, SUPT7L, TPR, TNPO2, TNPO1, KPNB1, RAN, SNUPN, TP53, NDUFA13, IPO9, MAPK1, PPIH, SEC61B, RPAIN, RPL23, IPO7, NUP205, IPO5, PTTG1IP, SPTBN1, NUTF2, KPNA4, XPO7, KPNA2	2426	94	13528	1.95762	0.430065	0.00292402	0.23971
	GOTERM_BP_FAT	GO:0006352~transcription initiation	30	1.02145	0.000155476	POLR2H, POLR2G, POLR2F, POLR2E, POLR2L, POLR2K, POLR2J, POLR2I, POLR2C, POLR2B, GTF2E2, MAZ, GTF2A2, TAF9, MYC, ERCC2, CCNH, TAF7, GTF2H4, CDK9, GTF2H3, CDK7, GTF2B, TAF11, MNAT1, PTRF, MED17, GTF2F1, THRAP3, GTF2F2	2426	83	13528	2.01551	0.495324	0.00353694	0.291481
	GOTERM_BP_FAT	GO:0051235~maintenance of location	25	0.851209	0.000163649	SRI, CAV1, TLN1, ENPP1, PDIA3, GPAA1, NFKBIA, CALR, MXI1, FTH1, EZR, SEH1L, SUPT7L, KDELR1, SRGN, KDELR3, KDELR2, G3BP2, YWHAB, TMSB10, TACC3, FLNB, FLNA, HSP90B1, TMSB4X	2426	64	13528	2.17823	0.513144	0.00370336	0.30678
	GOTERM_BP_FAT	GO:0032271~regulation of protein polymerization	26	0.885257	0.000173926	CAV2, CAV1, CAPZA2, CAPZA1, RDX, ARF6, ARPC5, CAPZB, ACTR3, CDC42EP2, GSN, ARPC2, RAC1, MLST8, RASA1, MAP1B, TMSB10, RICTOR, ARPC1A, ARPC1B, CDKN1B, CAPG, SPTBN1, TMSB4X, MAPRE1, SPTAN1	2426	68	13528	2.1321	0.534663	0.00391536	0.326016
	GOTERM_BP_FAT	GO:0006796~phosphate metabolic process	218	7.42254	0.000182378	PDP1, AURKA, AURKB, LPAR1, APP, ILK, ADAM9, PTPRM, PTPRF, PIM1, MARK3, MAPK1, SPAG9, NME2, EIF2AK1, SCYL1, NME1, EIF2S1, DLD, MAPK3, ATP5C1, MAPK9, MAPK8, NEK6, NEK7, ENPP1, GNAI2, NEK2, DUSP10, STK17B, ADRBK1, STK17A, ACP1, ATP6V0B, CD74, VRK1, DUSP14, MAP2K1, MAP2K2, TGFBR2, PTPN14, TRIO, OXSR1, PPA2, EPHA2, PPA1, UQCRHL, PTPN11, GRK6, ATP5E, ATP6V0E1, SLC20A1, NUAK1, ATP5B, EIF2A, DAXX, PTEN, …	2426	973	13528	1.24936	0.551646	0.00408436	0.341834
	GOTERM_BP_FAT	GO:0006793~phosphorus metabolic process	218	7.42254	0.000182378	PDP1, AURKA, AURKB, LPAR1, APP, ILK, ADAM9, PTPRM, PTPRF, PIM1, MARK3, MAPK1, SPAG9, NME2, EIF2AK1, SCYL1, NME1, EIF2S1, DLD, MAPK3, ATP5C1, MAPK9, MAPK8, NEK6, NEK7, ENPP1, GNAI2, NEK2, DUSP10, STK17B, ADRBK1, STK17A, ACP1, ATP6V0B, CD74, VRK1, DUSP14, MAP2K1, MAP2K2, TGFBR2, PTPN14, TRIO, OXSR1, PPA2, EPHA2, PPA1, UQCRHL, PTPN11, GRK6, ATP5E, ATP6V0E1, SLC20A1, NUAK1, ATP5B, EIF2A, DAXX, PTEN, …	2426	973	13528	1.24936	0.551646	0.00408436	0.341834
	GOTERM_BP_FAT	GO:0010740~positive regulation of protein kinase cascade	50	1.70242	0.000191246	PPARD, TMEM189-UBE2V1, SLC20A1, VAPA, IL6ST, LPAR1, TGFB2, CTNNB1, CANT1, IL11, GPX1, TMEM9B, MIER1, CASP8, ILK, RHOA, RHOC, TMEM101, CAT, BCL10, LTBR, BST2, CD40, ECT2, FLNA, UBE2N, C18ORF32, ADRB2, TNFRSF10B, ATP2C1, F3, EEF1D, NEK6, LITAF, PPM1A, UBE2V1, TFG, FKBP1A, LIF, TNFRSF1A, MAP3K3, SLC35B2, TGM2, TRAF7, CFLAR, IL6, LGALS1, NDFIP1, BIRC2, TNFSF10, PLK2	2426	167	13528	1.66954	0.5688	0.00426086	0.358428
	GOTERM_BP_FAT	GO:0008064~regulation of actin polymerization or depolymerization	24	0.81716	0.000202398	LIMA1, CAPZA2, CAPZA1, RDX, ARF6, TMSB10, RICTOR, ARPC5, CAPZB, DSTN, ARPC1A, ACTR3, ARPC1B, CDC42EP2, ARPC2, GSN, CAPG, CFL1, RAC1, SPTBN1, TMSB4X, MLST8, RASA1, SPTAN1	2426	61	13528	2.19394	0.589441	0.00448605	0.37929
	GOTERM_BP_FAT	GO:0016310~phosphorylation	183	6.23085	0.00021163	PRPF4B, NRBP1, ZAK, STK38, ATP6AP1, NDUFAB1, CASK, AURKA, AURKB, LPAR1, TGFB2, UQCR10, APP, CSNK2A1, UQCR11, ILK, PRKACA, ADAM9, EGFR, TWF1, STK25, CSNK1G2, PIM1, MARK3, STK4, WEE1, SPAG9, MAP4K4, MAPK1, NME2, EIF2AK1, SCYL1, NME1, EIF2S1, MAPK3, DLD, ATP5C1, MAPK9, MAPK8, NEK6, NEK7, CAV2, FGFR1, ADORA2B, GNAI2, NEK2, STK11, STK17B, PTK7, MAPKAPK3, ADRBK1, STK17A, ATP6V1B2, MAPKAPK2, RIOK2, ATP6…	2426	800	13528	1.27557	0.605781	0.00466671	0.396559
	GOTERM_BP_FAT	GO:0006612~protein targeting to membrane	16	0.544774	0.000241632	ARL6IP1, SRP14, PRKCI, TIMM10, TIMM13, SEC62, SSR1, MACF1, SRPR, TIMM9, SDCBP, SRP72, TRAM1, SSR2, SRP9, SSR3	2426	33	13528	2.70364	0.654521	0.00530003	0.452655
	GOTERM_BP_FAT	GO:0006892~post-Golgi vesicle-mediated transport	23	0.783112	0.00025016	STX4, SCAMP3, STX7, VTI1B, NAPA, OPTN, CLTC, FTH1, AP1S1, SCFD1, KRT18, ARF1, AP2A1, VAMP8, TXNDC5, PUM1, SORT1, SNAP23, EXOC5, CLINT1, HSPA8, DNM2, FTL	2426	58	13528	2.21127	0.667243	0.00545938	0.468596
	GOTERM_BP_FAT	GO:0010627~regulation of protein kinase cascade	68	2.31529	0.000255772	PPARD, TMEM189-UBE2V1, VAPA, SLC20A1, ZAK, IL6ST, ATP6AP2, LPAR1, DAXX, PDCD4, PTEN, PRDX1, IL11, TGFB2, CTNNB1, CANT1, AKT1, GPX1, TMEM9B, MIER1, ILK, CASP8, RHOA, RHOC, TMEM101, CAT, AKT2, BCL10, PPP2R1A, LTBR, BST2, C9ORF89, PKN1, CD40, ECT2, FLNA, UBE2N, C18ORF32, ADRB2, TNFRSF10B, ATP2C1, F3, PEBP1, EEF1D, NEK6, CAV1, LITAF, PPM1A, UBE2V1, TFG, FKBP1A, TIMP2, LIF, TNFRSF1A, MAP3K3, SLC35B2, …	2426	249	13528	1.52283	0.675357	0.00555397	0.479085
	GOTERM_BP_FAT	GO:0048199~vesicle targeting, to, from or within Golgi	9	0.306435	0.000262323	ARFGAP1, COPB2, COPA, ARF1, COPB1, ARCN1, COPZ1, TMED10, COPE	2426	12	13528	4.18219	0.684579	0.00566785	0.491326
	GOTERM_BP_FAT	GO:0007346~regulation of mitotic cell cycle	46	1.56622	0.000274718	CAV2, MAEA, AURKAIP1, NEK2, RPS27L, ANLN, ANAPC10, RCC1, PIN1, CDC42, APP, SBDS, CUL7, PCBP4, PRMT5, CDC123, BUB1, RANBP1, TPR, MYC, CCNA2, BUB3, DLG1, EGFR, CDK1, DLGAP5, TP53, SMAD3, CENPF, NUSAP1, RPL24, BIRC5, UBE2C, SIRT2, CDK2, CHMP1A, CCND1, MAD2L1, MAD2L1BP, ZWINT, BTG3, PEBP1, USP22, APBB2, MAD2L2, NEK6	2426	152	13528	1.68755	0.701317	0.00590589	0.514485
	GOTERM_BP_FAT	GO:0006487~protein amino acid N-linked glycosylation	19	0.646919	0.000303478	MGAT4B, OSTC, LIPA, FUT8, ALG2, MAN1B1, MOGS, MGAT1, STT3B, MAN2A1, MGAT2, MAGT1, POMGNT1, STT3A, MPDU1, RPN1, DAD1, RPN2, DDOST	2426	44	13528	2.40793	0.736815	0.00649055	0.568202
	GOTERM_BP_FAT	GO:0016567~protein ubiquitination	38	1.29384	0.000325695	TMEM189-UBE2V1, TSG101, UBE2V1, SAE1, UBE2V2, CDC34, ANAPC11, UBE3C, STUB1, AKT1, UBE2D3, UBE2D2, RNF11, NEDD4L, TRAF7, FBXW11, RPS27A, TRIP12, UBE2A, DDB1, PCNP, UBE2H, UBE2L3, UBE2C, TSPAN17, UBE2B, UBE2N, RNF8, NOSIP, GSPT1, HUWE1, VCP, FBXL5, CAND1, UBB, USP22, UBA52, UBE2E1, RNF41	2426	119	13528	1.78065	0.761322	0.00693043	0.609678
	GOTERM_BP_FAT	GO:0006901~vesicle coating	10	0.340483	0.00033182	ARFGAP1, COPB2, COPA, PICALM, ARF1, COPB1, AP2S1, ARCN1, COPZ1, COPE	2426	15	13528	3.7175	0.767668	0.00699268	0.62111
	GOTERM_BP_FAT	GO:0006259~DNA metabolic process	122	4.1539	0.000330252	MMS19, MORF4L1, XRCC5, RBM4, MORF4L2, XRCC6, RPS27L, PTTG1, NONO, RAD21, CTGF, CDKN2D, H2AFX, RBMS1, CIB1, RAN, CHTF8, MND1, RNASEH2A, RPAIN, FBXO18, TNFAIP1, RAD23B, HMGB1, TMX1, HMGB2, RAD23A, UBE2V2, PPT1, CDC34, BANF1, RBX1, TK1, SMARCB1, POLE3, GINS2, PHB, CINP, TSN, FOXP1, RNF8, DNASE2, TXNDC12, VCP, PPIA, POLD2, PCNA, SUPT16H, PARP4, HSPD1, PARP1, RBPJ, PTGES3, KIF22, NAP1L1, MLH1, BNIP3, …	2426	506	13528	1.34447	0.766059	0.00699325	0.618184
	GOTERM_BP_FAT	GO:0045185~maintenance of protein location	20	0.680967	0.000344998	KDELR3, KDELR2, CAV1, TLN1, PDIA3, YWHAB, G3BP2, GPAA1, NFKBIA, TMSB10, TACC3, MXI1, FLNB, FLNA, EZR, SEH1L, TMSB4X, SUPT7L, KDELR1, SRGN	2426	48	13528	2.32344	0.780754	0.00723476	0.645701
	GOTERM_BP_FAT	GO:0030832~regulation of actin filament length	24	0.81716	0.000351075	LIMA1, CAPZA2, CAPZA1, RDX, ARF6, TMSB10, RICTOR, ARPC5, CAPZB, DSTN, ARPC1A, ACTR3, ARPC1B, CDC42EP2, ARPC2, GSN, CAPG, CFL1, RAC1, SPTBN1, TMSB4X, MLST8, RASA1, SPTAN1	2426	63	13528	2.12429	0.786538	0.00732682	0.657039
	GOTERM_BP_FAT	GO:0001836~release of cytochrome c from mitochondria	12	0.40858	0.000360178	BID, BAK1, GPX1, CASP3, BAX, TP53, SMAD3, BCL2L1, SFN, PMAIP1, MYC, SOD2	2426	21	13528	3.18643	0.794919	0.00748064	0.674022
	GOTERM_BP_FAT	GO:0033554~cellular response to stress	134	4.56248	0.000373506	MMS19, MORF4L1, XRCC5, MRPS35, MICA, ZAK, VAPB, RBM4, MORF4L2, XRCC6, ROMO1, RPS27L, PTTG1, NONO, RAD21, CDKN2D, INSIG1, H2AFX, CCNA2, EIF2B5, CIB1, AARS, PPP1CB, DDIT3, PYCR1, MAPK1, HIF1A, RPAIN, FBXO18, EIF2S1, MAPK9, MAPK8, NFE2L2, MCTS1, RAD23B, HMGB1, DERL2, HMGB2, CAV1, ADORA2B, RAD23A, DUSP10, UBE2V2, RBX1, LAMB2, DYRK2, ERO1L, DHX9, HERPUD1, CCM2, BECN1, PTPN11, ATF6, RNF8, TXNDC12, ATF4…	2426	566	13528	1.32017	0.806598	0.00771998	0.698881
	GOTERM_BP_FAT	GO:0007017~microtubule-based process	68	2.31529	0.00041546	KIF22, KIFC1, PRC1, MLH1, AURKA, CNP, KIFC3, CTNNB1, KIF2C, APP, DYNLL1, SEH1L, DYNLL2, TUBB6, RANBP1, TUBG1, DYNC1H1, PPP4C, TUBA1A, TUBA1B, TUBB3, TUBA1C, OPA1, KIF5B, STMN3, RAN, KTN1, NUSAP1, MYH9, TACC3, UBE2C, UBE2B, DCTN2, KIF1C, SS18, UXT, SPAG5, ZWINT, HAUS7, STMN1, KPNA2, DYNLRB1, GADD45A, LRPPRC, DYNC1I2, HAUS4, CAV2, CAV1, NEK2, CETN3, CETN2, ARPC4, RCC1, TUBB, PTK2, MACF1, KLC1, NPM1…	2426	253	13528	1.49876	0.839196	0.00854344	0.777092
	GOTERM_BP_FAT	GO:0008637~apoptotic mitochondrial changes	15	0.510725	0.000421778	BID, TP53, SMAD3, PMAIP1, SFN, BCL2L1, SOD2, AKT1, GPX1, BAK1, CASP3, SH3GLB1, BAX, MYC, DAP3	2426	31	13528	2.69819	0.843605	0.00863247	0.788865
	GOTERM_BP_FAT	GO:0048205~COPI coating of Golgi vesicle	8	0.272387	0.00042602	ARFGAP1, COPB2, COPA, ARF1, COPB1, ARCN1, COPZ1, COPE	2426	10	13528	4.46101	0.846497	0.00867856	0.796769
	GOTERM_BP_FAT	GO:0048194~Golgi vesicle budding	8	0.272387	0.00042602	ARFGAP1, COPB2, COPA, ARF1, COPB1, ARCN1, COPZ1, COPE	2426	10	13528	4.46101	0.846497	0.00867856	0.796769
	GOTERM_BP_FAT	GO:0048200~Golgi transport vesicle coating	8	0.272387	0.00042602	ARFGAP1, COPB2, COPA, ARF1, COPB1, ARCN1, COPZ1, COPE	2426	10	13528	4.46101	0.846497	0.00867856	0.796769
	GOTERM_BP_FAT	GO:0030036~actin cytoskeleton organization	62	2.111	0.000432358	DLC1, LIMA1, HRAS, TLN1, CAPZA2, FERMT2, CAPZA1, RHOQ, DSTN, ACTG1, CDC42, DYNLL1, PAK2, PACSIN2, GSN, RHOA, RALA, CAP1, RHOF, PLS3, DLG1, ACTN4, PRKCI, ACTN1, TMSB10, MYH9, FLNB, FLNA, ARPC1A, RND3, KRT19, ATP2C1, LIMCH1, CFL1, SDCBP, TMSB4X, ALDOA, CNN3, SSH1, CALD1, NEDD9, ARPC4, ARF6, CYTH2, ARPC5, CALR, CAPZB, ITGB1, PFN1, CDC42EP2, EZR, RAC2, RAC1, PAFAH1B1, TRIP10, ARHGDIB, INF2, ARFIP2, R…	2426	226	13528	1.52977	0.850718	0.00876654	0.808578
	GOTERM_BP_FAT	GO:0044087~regulation of cellular component biogenesis	43	1.46408	0.000441102	DLC1, CAV2, HMGB1, CAV1, CAPZA2, CAPZA1, RHOQ, ARF6, RDX, ARPC5, PTEN, CAPZB, ACTR3, CDC42, SUMO1, CDC42EP2, PTK2, ARPC2, GSN, RAC1, RHOA, RALA, PRKAA1, MLST8, THBS1, RASA1, RPS27A, MAP1B, SMAD3, TMSB10, RICTOR, MMP14, ARPC1A, ARPC1B, CDKN1B, CAPG, SPTBN1, TMSB4X, CAND1, MAPRE1, UBB, UBA52, SPTAN1	2426	142	13528	1.68858	0.856353	0.00890205	0.824867
	GOTERM_BP_FAT	GO:0000387~spliceosomal snRNP biogenesis	14	0.476677	0.000485693	NCBP2, PRPF31, SNUPN, SNRPD3, SNRPD1, SNRPD2, PHAX, PRMT5, SNRPB, SNRPC, SNRPF, SNRPE, GEMIN7, SNRPG	2426	28	13528	2.78813	0.881944	0.00975303	0.907893
	GOTERM_BP_FAT	GO:0006984~ER-nuclear signaling pathway	16	0.544774	0.000528267	DERL2, HERPUD1, VAPB, AARS, TP53, DDIT3, ATF6, CCND1, VCP, ATP2A2, INSIG1, HSPA5, ERO1L, NFE2L2, PPP1R15B, PPP1R15A	2426	35	13528	2.54915	0.902112	0.0105555	0.987102
	GOTERM_BP_FAT	GO:0006164~purine nucleotide biosynthetic process	44	1.49813	0.000575097	ALDOA, ADSS, ATP5E, ATP6V0E1, ATP1B1, ATP5B, ATP6AP1, RP2, ATP5G2, ATP5G1, ATP6V1B2, ATP5G3, ATP6V0B, MTHFD1, ATP2B4, ATP5S, ATP5L, ATP5O, ATP5I, ATP5H, NT5E, IMPDH1, IMPDH2, ATP5J, ATP5J2, ATP5F1, AK3, ATP1A1, ATP13A3, ATP6V1D, GMPS, ATP6V1F, NME6, ATP6V1C1, ATP6V1A, NME2, NME1-NME2, ATP2A2, NME1, ATP2C1, ADK, ATP6V1E1, ATP5C1, ATP5A1, PAICS, PRPS1	2426	148	13528	1.65781	0.920341	0.0114341	1.07416
	GOTERM_BP_FAT	GO:0043039~tRNA aminoacylation	19	0.646919	0.000578191	CARS, YARS, NARS, DARS, AIMP1, SARS, AARS, GARS, EPRS, QARS, KARS, DTD1, IARS, WARS, TARS, RARS, HARS, TPR, MARS	2426	46	13528	2.30324	0.921418	0.0114436	1.07991
	GOTERM_BP_FAT	GO:0043038~amino acid activation	19	0.646919	0.000578191	CARS, YARS, NARS, DARS, AIMP1, SARS, AARS, GARS, EPRS, QARS, KARS, DTD1, IARS, WARS, TARS, RARS, HARS, TPR, MARS	2426	46	13528	2.30324	0.921418	0.0114436	1.07991
	GOTERM_BP_FAT	GO:0006418~tRNA aminoacylation for protein translation	19	0.646919	0.000578191	CARS, YARS, NARS, DARS, AIMP1, SARS, AARS, GARS, EPRS, QARS, KARS, DTD1, IARS, WARS, TARS, RARS, HARS, TPR, MARS	2426	46	13528	2.30324	0.921418	0.0114436	1.07991
	GOTERM_BP_FAT	GO:0032956~regulation of actin cytoskeleton organization	30	1.02145	0.000594769	DLC1, LIMA1, PDGFA, CAPZA2, CAPZA1, RHOQ, ARF6, RDX, ARPC5, CAPZB, DSTN, ACTR3, CDC42EP2, GSN, ARPC2, ILK, RAC1, RHOA, MLST8, RASA1, SMAD3, TMSB10, RICTOR, ARPC1A, ARPC1B, CAPG, CFL1, SPTBN1, TMSB4X, SPTAN1	2426	89	13528	1.87964	0.926947	0.0117172	1.11071
	GOTERM_BP_FAT	GO:0006903~vesicle targeting	12	0.40858	0.000604163	ARFGAP1, COPB2, STX5, COPA, ARF1, COPB1, ARCN1, COPZ1, TMED10, SNAP23, YKT6, COPE	2426	22	13528	3.04159	0.929905	0.0118481	1.12816
	GOTERM_BP_FAT	GO:0008633~activation of pro-apoptotic gene products	12	0.40858	0.000604163	BID, AKT1, TNFSF10, TNFRSF10B, DYNLL1, CASP8, YWHAB, PPP3R1, SMAD3, MAPK8, BAD, MYC	2426	22	13528	3.04159	0.929905	0.0118481	1.12816
	GOTERM_BP_FAT	GO:0006333~chromatin assembly or disassembly	39	1.32789	0.000631402	HIST4H4, HP1BP3, NAP1L1, CBX3, CBX1, HIST1H2BO, HIST2H2AB, HIST1H2BN, HIST1H2BK, H2AFV, HIST1H2BL, HIST2H2AC, HIST1H2BJ, H2AFZ, H2AFY, H2AFX, H1F0, HIST1H1E, HIST1H1C, H2AFJ, HMGA1, SMARCE1, HIST2H2BE, HIST2H2BF, HIST1H2AB, HIST1H2AC, HMGB2, HIST1H2AG, TSPYL1, SET, CDYL, HIST1H4A, HIST1H4B, HJURP, NPM1, HIST1H4C, HIST1H4H, HIST1H2BB, HIST1H3J, HIST1H2BC, HIST1H2BD, HIST1H2BE, HIST2H3D, HIST1H3A, …	2426	127	13528	1.71239	0.937824	0.0123243	1.17874
	GOTERM_BP_FAT	GO:0006900~membrane budding	10	0.340483	0.000637929	ARFGAP1, COPB2, COPA, PICALM, ARF1, COPB1, AP2S1, ARCN1, COPZ1, COPE	2426	16	13528	3.48516	0.939584	0.0123959	1.19085
	GOTERM_BP_FAT	GO:0030833~regulation of actin filament polymerization	21	0.715015	0.000675517	CAPZA2, CAPZA1, RDX, ARF6, TMSB10, RICTOR, ARPC5, CAPZB, ARPC1A, ACTR3, ARPC1B, CDC42EP2, ARPC2, GSN, CAPG, RAC1, SPTBN1, TMSB4X, MLST8, RASA1, SPTAN1	2426	54	13528	2.16854	0.948795	0.013064	1.2606
	GOTERM_BP_FAT	GO:0006919~activation of caspase activity	21	0.715015	0.000675517	DLC1, SIVA1, CYCS, TP53, SMAD3, PMAIP1, BCL2L13, STAT1, RPS3, BAK1, MOAP1, TNFRSF10B, VCP, GSPT1, F3, BAX, MTCH1, DIABLO, HSPE1, HSPD1, MYC	2426	54	13528	2.16854	0.948795	0.013064	1.2606
	GOTERM_BP_FAT	GO:0043254~regulation of protein complex assembly	30	1.02145	0.000729565	CAV2, HMGB1, CAV1, CAPZA2, CAPZA1, ARF6, RDX, ARPC5, CAPZB, ACTR3, CDC42, SUMO1, CDC42EP2, ARPC2, GSN, RAC1, MLST8, RASA1, MAP1B, TMSB10, RICTOR, ARPC1A, ARPC1B, CDKN1B, CAPG, SPTBN1, TMSB4X, CAND1, MAPRE1, SPTAN1	2426	90	13528	1.85875	0.959635	0.0140406	1.36081
	GOTERM_BP_FAT	GO:0009165~nucleotide biosynthetic process	52	1.77051	0.000835033	NAMPT, ATP5E, ATP6V0E1, ATP1B1, ATP6AP1, RP2, ATP5B, DTYMK, PNP, MTHFD1, ATP2B4, ATP5S, ATP5L, ATP5O, ATP5I, ATP5H, NT5E, IMPDH1, IMPDH2, ATP5J, NADSYN1, ATP6V1D, GMPS, ATP6V1F, NME6, ATP6V1C1, ATP6V1A, NME2, NME1, ATP2C1, ADK, RRM1, ATP5C1, PRPS2, PRPS1, ALDOA, ADSS, ATP5G2, ATP6V1B2, ATP5G1, ATP5G3, ATP6V0B, CMPK1, DCTD, ATP5J2, ATP5F1, AK3, ATP1A1, ATP13A3, NME1-NME2, ATP2A2, ATP6V1E1, ATP5A1,…	2426	186	13528	1.55895	0.974625	0.0159849	1.55607
	GOTERM_BP_FAT	GO:0030262~apoptotic nuclear changes	13	0.442629	0.000854209	AIFM1, CYCS, BNIP3, NDUFA13, PPT1, SOD1, TXNDC12, MOAP1, CASP3, BAX, ACIN1, TOP2A, MYC	2426	26	13528	2.78813	0.976679	0.0162784	1.59154
	GOTERM_BP_FAT	GO:0006769~nicotinamide metabolic process	17	0.578822	0.000870689	DLST, NAMPT, LDHB, TALDO1, NADSYN1, NADK, PNP, HIBADH, IDH3A, TPI1, PGLS, TP53I3, IDH3G, IDH1, DCXR, MDH2, MDH1	2426	40	13528	2.36991	0.978311	0.0165184	1.62201
	GOTERM_BP_FAT	GO:0046496~nicotinamide nucleotide metabolic process	17	0.578822	0.000870689	DLST, NAMPT, LDHB, TALDO1, NADSYN1, NADK, PNP, HIBADH, IDH3A, TPI1, PGLS, TP53I3, IDH3G, IDH1, DCXR, MDH2, MDH1	2426	40	13528	2.36991	0.978311	0.0165184	1.62201
	GOTERM_BP_FAT	GO:0043280~positive regulation of caspase activity	22	0.749064	0.000918034	DLC1, SIVA1, CYCS, TP53, SMAD3, PMAIP1, BCL2L13, STAT1, RPS3, BAK1, MOAP1, TNFRSF10B, UACA, VCP, GSPT1, F3, BAX, MTCH1, DIABLO, HSPE1, HSPD1, MYC	2426	59	13528	2.07928	0.982391	0.0173344	1.70949
	GOTERM_BP_FAT	GO:0010952~positive regulation of peptidase activity	22	0.749064	0.000918034	DLC1, SIVA1, CYCS, TP53, SMAD3, PMAIP1, BCL2L13, STAT1, RPS3, BAK1, MOAP1, TNFRSF10B, UACA, VCP, GSPT1, F3, BAX, MTCH1, DIABLO, HSPE1, HSPD1, MYC	2426	59	13528	2.07928	0.982391	0.0173344	1.70949
	GOTERM_BP_FAT	GO:0006508~proteolysis	228	7.76302	0.00101514	PPP2R5C, CD2AP, ERLEC1, PGPEP1, CUL7, ISG15, BTBD1, CD46, PSENEN, ADAM8, ADAM9, CDCA3, AUP1, CAPNS1, ANAPC5, UBE2J1, UBR2, SKP1, MYH9, MAD2L1, HUWE1, F3, DLD, FBXL5, YME1L1, RAD23B, RAD23A, UBA6, RFFL, CDC34, CTSL1, ARIH2, CACYBP, FBXO7, PLAT, NPLOC4, OSGEP, CFB, UBE2L6, PCNP, CDC20, CDC26, UBE2L3, RNF8, CD55, UBA1, UBA2, UBA3, SMURF2, PLAU, DPP3, TSG101, UBE2G1, UFC1, RLIM, LONP1, DPP7, DHCR24, …	2426	1054	13528	1.20625	0.988516	0.0190694	1.88867
	GOTERM_BP_FAT	GO:0051651~maintenance of location in cell	19	0.646919	0.00104399	SRI, KDELR3, KDELR2, CAV1, TLN1, PDIA3, YWHAB, G3BP2, GPAA1, NFKBIA, TACC3, MXI1, FLNB, FLNA, FTH1, EZR, SEH1L, SUPT7L, KDELR1	2426	48	13528	2.20727	0.989886	0.0195231	1.94187
	GOTERM_BP_FAT	GO:0032970~regulation of actin filament-based process	30	1.02145	0.00108118	DLC1, LIMA1, PDGFA, CAPZA2, CAPZA1, RHOQ, ARF6, RDX, ARPC5, CAPZB, DSTN, ACTR3, CDC42EP2, GSN, ARPC2, ILK, RAC1, RHOA, MLST8, RASA1, SMAD3, TMSB10, RICTOR, ARPC1A, ARPC1B, CAPG, CFL1, SPTBN1, TMSB4X, SPTAN1	2426	92	13528	1.81834	0.991414	0.0201263	2.01037
	GOTERM_BP_FAT	GO:0006366~transcription from RNA polymerase II promoter	62	2.111	0.00112369	COPS2, COPS5, PTTG1, YBX1, FUBP1, MAX, GTF2E2, MAZ, GTF2A2, SUPT5H, MYC, CCNH, GTF2H4, GTF2H3, CDK9, CDK7, GTF2B, DDIT3, ELL2, TAF11, ADRM1, HIF1A, ABT1, MED17, NFE2L1, NFE2L2, NFE2L3, POLR2H, SUPT3H, POLR2G, POLR2F, POLR2E, POLR2L, POLR2K, POLR2J, POLR2I, NR3C1, POLR2C, POLR2B, TSC22D1, BTF3, ETV1, TCEA1, TAF9, SUPT4H1, APEX1, ERCC2, TAF7, AFF4, PMF1, STAT1, MNAT1, PSMC5, ETS1, GTF2F1, THRAP3, G…	2426	234	13528	1.47747	0.992879	0.0208218	2.08863
	GOTERM_BP_FAT	GO:0006308~DNA catabolic process	22	0.749064	0.00117721	RAD23B, CCNH, AIFM1, DDB1, CYCS, GTF2H4, BNIP3, GTF2H3, UBE2V2, PPT1, CDK7, SOD1, UBE2N, RPA1, DNASE2, MNAT1, TXNDC12, CASP3, BAX, MYC, ERCC1, ERCC2	2426	60	13528	2.04463	0.994374	0.0217117	2.18707
	GOTERM_BP_FAT	GO:0032507~maintenance of protein location in cell	17	0.578822	0.00119309	KDELR3, KDELR2, TLN1, CAV1, PDIA3, YWHAB, GPAA1, G3BP2, NFKBIA, TACC3, MXI1, FLNB, FLNA, EZR, SEH1L, SUPT7L, KDELR1	2426	41	13528	2.31211	0.994754	0.0219097	2.21625
	GOTERM_BP_FAT	GO:0009820~alkaloid metabolic process	17	0.578822	0.00119309	DLST, NAMPT, LDHB, TALDO1, NADSYN1, NADK, PNP, HIBADH, IDH3A, TPI1, PGLS, TP53I3, IDH3G, IDH1, DCXR, MDH2, MDH1	2426	41	13528	2.31211	0.994754	0.0219097	2.21625
	GOTERM_BP_FAT	GO:0051098~regulation of binding	44	1.49813	0.00120867	TMEM189-UBE2V1, PRDX2, PRDX3, DPH3, RPS3, BAK1, AES, GTF2A2, CAT, IRAK2, IRAK1, BCL10, ICAM1, GTPBP4, SP100, PCBD1, PIM1, PRKCD, DDIT3, FLNA, LRPAP1, UBE2N, ADRB2, NME2, NME1, EDF1, COMMD7, SIVA1, MTDH, CALD1, NFKBIA, UBE2V1, FKBP1A, SUMO1, SMARCB1, NPM1, APEX1, ERCC2, IL6, CEBPG, ITGA2, SMAD3, HDAC2, AIDA, NME1-NME2, BAX, CALM3, CALM2, CALM1	2426	153	13528	1.60363	0.995102	0.0221006	2.24489
	GOTERM_BP_FAT	GO:0034976~response to endoplasmic reticulum stress	15	0.510725	0.00129605	HERPUD1, DERL2, VAPB, AARS, TP53, DDIT3, ATF6, ATF4, CCND1, VCP, HSPA5, ERO1L, NFE2L2, PPP1R15B, PPP1R15A	2426	34	13528	2.46011	0.996666	0.0235824	2.40532
	GOTERM_BP_FAT	GO:0051276~chromosome organization	114	3.88151	0.00137982	MORF4L1, XRCC5, KIFC1, HMGN2, RBM4, MORF4L2, XRCC6, CBX3, CBX1, PTTG1, HIST1H2BO, HIST1H2BN, HIST1H2BK, BRPF3, H2AFV, HIST1H2BL, HIST1H2BJ, SEP15, H2AFZ, H2AFY, H2AFX, ACIN1, SUPT5H, CDCA5, H1F0, HMG20B, H2AFJ, NCAPD2, CHRAC1, MAD2L1, SMARCE1, HUWE1, ZWINT, PELO, SMARCA1, MEAF6, HMGB1, HMGB2, TADA3, NEK2, VPS72, HIST1H4A, HIST1H4B, SMARCB1, NPM1, HIST1H4C, SUPT7L, TAF9, HIST1H4H, HIST1H3J, PHB, S…	2426	485	13528	1.31071	0.997695	0.0249853	2.5589
	GOTERM_BP_FAT	GO:0051325~interphase	33	1.1236	0.00138576	PPP6C, ANAPC10, CDC34, RCC1, ITGB1, AKT1, APP, CDKN2C, CDKN2D, KRT7, CDC123, CDCA5, EGFR, ANAPC5, PIM1, CENPF, TBRG4, CDK6, BIRC5, CDK4, CDKN3, PPP1CB, CDK2, CCNB1, MNAT1, CCND1, CDKN1B, CUL4A, GSPT1, CDK2AP1, KPNA2, GADD45A, DNM2	2426	106	13528	1.736	0.997754	0.0249888	2.56978
	GOTERM_BP_FAT	GO:0007242~intracellular signaling cascade	266	9.05686	0.00139218	HRAS, IL6ST, RAB1B, AURKA, LPAR1, RAB1A, CTNNB1, CTGF, RAB24, H2AFX, DDAH2, RAPGEF1, CCNA2, GNG5, DDAH1, ADAM9, GTPBP2, RAN, GEM, TANK, RND3, MAPK1, SPAG9, RAB18, SPAG5, MED17, ZWINT, MAPK3, MAPK9, ARL8A, RAB12, MAPK8, ARL8B, RAB10, DCBLD2, GNAI2, CNIH, DUSP10, STK17B, NFKBIA, ARF6, STK17A, ARF5, CALR, CD74, NR1H2, RAC2, RAC1, ABR, MAP2K1, MAP2K2, ARFIP2, OXSR1, RPS6, TAX1BP3, PTPN11, ARF1, RNF4,…	2426	1256	13528	1.18096	0.997817	0.0250007	2.58154
	GOTERM_BP_FAT	GO:0030029~actin filament-based process	63	2.14505	0.00146151	DLC1, LIMA1, HRAS, TLN1, CAPZA2, FERMT2, CAPZA1, RHOQ, DSTN, ACTG1, CDC42, DYNLL1, PAK2, PACSIN2, GSN, RHOA, RALA, CAP1, RHOF, PLS3, DLG1, ACTN4, PRKCI, ACTN1, TMSB10, MYH9, FLNB, FLNA, ARPC1A, RND3, KRT19, ATP2C1, LIMCH1, CFL1, SDCBP, TMSB4X, ALDOA, MYL6, CNN3, SSH1, CALD1, NEDD9, ARPC4, ARF6, CYTH2, ARPC5, CALR, CAPZB, ITGB1, PFN1, CDC42EP2, EZR, RAC2, RAC1, PAFAH1B1, TRIP10, ARHGDIB, INF2, ARF…	2426	241	13528	1.45769	0.998391	0.0261236	2.70843
	GOTERM_BP_FAT	GO:0019362~pyridine nucleotide metabolic process	17	0.578822	0.00161067	DLST, NAMPT, LDHB, TALDO1, NADSYN1, NADK, PNP, HIBADH, IDH3A, TPI1, PGLS, TP53I3, IDH3G, IDH1, DCXR, MDH2, MDH1	2426	42	13528	2.25706	0.999166	0.0286371	2.98091
	GOTERM_BP_FAT	GO:0045047~protein targeting to ER	7	0.238338	0.00168639	SRP14, MACF1, SRPR, SRP72, SEC61A1, SRP9, SEC61G	2426	9	13528	4.33709	0.999403	0.0298435	3.11894
	GOTERM_BP_FAT	GO:0010038~response to metal ion	38	1.29384	0.00173002	CAV1, IMPA1, SEC31A, ALG2, BCL2L1, PTEN, CTNNB1, ACTG1, GSS, PEF1, GPX1, GSN, SERPINA1, NEDD4L, THBS1, ADAM9, CUTA, TXNIP, EGFR, ACTB, BSG, S100A16, STIM1, ITPR3, SOD1, MT1X, MNAT1, NPC1, CCND1, TFRC, ANXA11, CYBRD1, CALM3, PEBP1, MAPK9, MAPK8, PRNP, PDCD6, CALM2, CALM1	2426	129	13528	1.64262	0.999507	0.0302399	3.19841
	GOTERM_BP_FAT	GO:0030968~endoplasmic reticulum unfolded protein response	11	0.374532	0.00172477	ATF6, HERPUD1, CCND1, DERL2, VCP, VAPB, AARS, NFE2L2, ERO1L, PPP1R15A, DDIT3	2426	21	13528	2.9209	0.999496	0.0302697	3.18886
	GOTERM_BP_FAT	GO:0034620~cellular response to unfolded protein	11	0.374532	0.00172477	ATF6, HERPUD1, CCND1, DERL2, VCP, VAPB, AARS, NFE2L2, ERO1L, PPP1R15A, DDIT3	2426	21	13528	2.9209	0.999496	0.0302697	3.18886
	GOTERM_BP_FAT	GO:0010639~negative regulation of organelle organization	27	0.919305	0.00174021	DLC1, LIMA1, AURKAIP1, CAPZA2, CAPZA1, RDX, CAPZB, SBDS, SET, GSN, NPM1, BUB1, TPR, ERCC1, TAF7, MAP1B, CENPF, TMSB10, MID1IP1, MAD2L1, CAPG, MAP4, SPTBN1, TMSB4X, MAPRE1, MAD2L2, SPTAN1	2426	82	13528	1.83608	0.999529	0.0302951	3.21695
	GOTERM_BP_FAT	GO:0051329~interphase of mitotic cell cycle	32	1.08955	0.00172252	PPP6C, ANAPC10, CDC34, RCC1, ITGB1, AKT1, APP, CDKN2C, CDKN2D, CDC123, CDCA5, EGFR, ANAPC5, PIM1, CENPF, TBRG4, CDK6, BIRC5, CDK4, CDKN3, PPP1CB, CDK2, CCNB1, MNAT1, CCND1, CDKN1B, CUL4A, GSPT1, CDK2AP1, KPNA2, GADD45A, DNM2	2426	103	13528	1.73243	0.999491	0.0303517	3.18475
	GOTERM_BP_FAT	GO:0034404~nucleobase, nucleoside and nucleotide biosynthetic process	52	1.77051	0.00200886	NAMPT, ATP5E, ATP6V0E1, ATP1B1, ATP6AP1, RP2, ATP5B, DTYMK, PNP, MTHFD1, ATP2B4, ATP5S, ATP5L, ATP5O, ATP5I, ATP5H, NT5E, IMPDH1, IMPDH2, ATP5J, NADSYN1, ATP6V1D, GMPS, ATP6V1F, NME6, ATP6V1C1, ATP6V1A, NME2, NME1, ATP2C1, ADK, RRM1, ATP5C1, PRPS2, PRPS1, ALDOA, ADSS, ATP5G2, ATP6V1B2, ATP5G1, ATP5G3, ATP6V0B, CMPK1, DCTD, ATP5J2, ATP5F1, AK3, ATP1A1, ATP13A3, NME1-NME2, ATP2A2, ATP6V1E1, ATP5A1,…	2426	193	13528	1.50241	0.999856	0.034757	3.70476
	GOTERM_BP_FAT	GO:0034654~nucleobase, nucleoside, nucleotide and nucleic acid biosynthetic process	52	1.77051	0.00200886	NAMPT, ATP5E, ATP6V0E1, ATP1B1, ATP6AP1, RP2, ATP5B, DTYMK, PNP, MTHFD1, ATP2B4, ATP5S, ATP5L, ATP5O, ATP5I, ATP5H, NT5E, IMPDH1, IMPDH2, ATP5J, NADSYN1, ATP6V1D, GMPS, ATP6V1F, NME6, ATP6V1C1, ATP6V1A, NME2, NME1, ATP2C1, ADK, RRM1, ATP5C1, PRPS2, PRPS1, ALDOA, ADSS, ATP5G2, ATP6V1B2, ATP5G1, ATP5G3, ATP6V0B, CMPK1, DCTD, ATP5J2, ATP5F1, AK3, ATP1A1, ATP13A3, NME1-NME2, ATP2A2, ATP6V1E1, ATP5A1,…	2426	193	13528	1.50241	0.999856	0.034757	3.70476
	GOTERM_BP_FAT	GO:0010604~positive regulation of macromolecule metabolic process	187	6.36704	0.00202911	MMS19, DLC1, HRAS, AURKAIP1, IL6ST, PDGFA, XRCC6, RBM4, MORF4L2, NAA15, EIF5A, CASK, CNOT7, CTNNB1, CITED2, TGFB2, IL11, APP, H2AFX, MLST8, SUPT5H, CCNA2, RPS27A, EIF2B5, ADAM9, BCL10, ANAPC5, PCBD1, RAN, NRD1, CD40, SKP1, IRS1, DDIT3, JUNB, PSMA2, PSMA1, MAPK1, HIF1A, PSMA6, PSMA5, MED17, PSMA4, VEGFA, SIX1, PSMA3, MAPK9, NFE2L2, SMARCA1, UBA52, TMX1, CNBP, HMGB2, CAV1, NFKBIA, ELK1, ANAPC10, AN…	2426	857	13528	1.21676	0.999868	0.0349642	3.74144
	GOTERM_BP_FAT	GO:0048255~mRNA stabilization	9	0.306435	0.00204322	DHX9, PAIP1, VEGFA, HNRNPD, ELAVL1, MAPKAPK2, PABPC1, HNRNPU, YBX1	2426	15	13528	3.34575	0.999876	0.035066	3.76699
	GOTERM_BP_FAT	GO:0043489~RNA stabilization	9	0.306435	0.00204322	DHX9, PAIP1, VEGFA, HNRNPD, ELAVL1, MAPKAPK2, PABPC1, HNRNPU, YBX1	2426	15	13528	3.34575	0.999876	0.035066	3.76699
	GOTERM_BP_FAT	GO:0006403~RNA localization	31	1.0555	0.00214125	NCBP2, ENY2, NXT1, XPO1, NUP98, AGFG1, EIF5A, STAU1, RBM8A, SEH1L, NPM1, QKI, TPR, XPOT, NUP153, MYO1C, RAN, CKAP5, HNRNPA2B1, G3BP2, NUP85, NUPL1, HNRNPA1, EIF4A3, PHAX, NUP205, THOC6, THOC7, XPO7, LRPPRC, MVP	2426	100	13528	1.72864	0.99992	0.0365763	3.94429
	GOTERM_BP_FAT	GO:0006351~transcription, DNA-dependent	73	2.48553	0.00217809	TAF1B, GTF3A, COPS2, COPS5, CRCP, PTTG1, YBX1, FUBP1, MAX, GTF2E2, MAZ, GTF2A2, SUPT5H, MYC, CCNH, TP53, GTF2H4, GTF2H3, CDK9, POLR1C, CDK7, GTF2B, DDIT3, ELL2, TAF11, ADRM1, HIF1A, PTRF, ABT1, MED17, NFE2L1, NFE2L2, NFE2L3, POLR2H, SUPT3H, POLR2G, POLR2F, POLR2E, POLR2L, POLR2K, POLR2J, POLR2I, NR3C1, POLR2C, POLR2B, TSC22D1, TFAM, MRPL12, BTF3, ETV1, GTF3C5, TCEA1, TAF9, SUPT4H1, TCEA2, APEX1, …	2426	292	13528	1.39406	0.999932	0.0370508	4.01085
	GOTERM_BP_FAT	GO:0051236~establishment of RNA localization	30	1.02145	0.00266193	NCBP2, ENY2, NXT1, XPO1, NUP98, AGFG1, EIF5A, RBM8A, SEH1L, NPM1, QKI, TPR, XPOT, NUP153, MYO1C, RAN, CKAP5, HNRNPA2B1, G3BP2, NUP85, NUPL1, HNRNPA1, EIF4A3, PHAX, NUP205, THOC6, THOC7, XPO7, LRPPRC, MVP	2426	97	13528	1.72462	0.999992	0.0447594	4.88091
	GOTERM_BP_FAT	GO:0050658~RNA transport	30	1.02145	0.00266193	NCBP2, ENY2, NXT1, XPO1, NUP98, AGFG1, EIF5A, RBM8A, SEH1L, NPM1, QKI, TPR, XPOT, NUP153, MYO1C, RAN, CKAP5, HNRNPA2B1, G3BP2, NUP85, NUPL1, HNRNPA1, EIF4A3, PHAX, NUP205, THOC6, THOC7, XPO7, LRPPRC, MVP	2426	97	13528	1.72462	0.999992	0.0447594	4.88091
	GOTERM_BP_FAT	GO:0050657~nucleic acid transport	30	1.02145	0.00266193	NCBP2, ENY2, NXT1, XPO1, NUP98, AGFG1, EIF5A, RBM8A, SEH1L, NPM1, QKI, TPR, XPOT, NUP153, MYO1C, RAN, CKAP5, HNRNPA2B1, G3BP2, NUP85, NUPL1, HNRNPA1, EIF4A3, PHAX, NUP205, THOC6, THOC7, XPO7, LRPPRC, MVP	2426	97	13528	1.72462	0.999992	0.0447594	4.88091
	GOTERM_BP_FAT	GO:0043488~regulation of mRNA stability	11	0.374532	0.00265862	ZFP36L1, DHX9, SERBP1, PAIP1, VEGFA, HNRNPD, ELAVL1, MAPKAPK2, PABPC1, HNRNPU, YBX1	2426	22	13528	2.78813	0.999992	0.0448763	4.87498
	GOTERM_MF_FAT	GO:0003735~structural constituent of ribosome	129	4.39224	6.90549e-64	RPL18, MRPS36, RPL17, RPL36A, MRPL42, MRPL41, MRPS33, RPL19, RPL14, RPL13, RPL15, RPLP2, RPS27L, RPL22L1, MRPS30, RPLP0, RPLP1, MRPL36, RPL26L1, FAU, RPL10, RPL11, RPL12, MRPL32, MRPL33, MRPL34, RPS27A, RPL36AL, MRPL35, RPL35A, MRPL52, MRPL51, RSL1D1, RPS18, RPS19, RPS16, MRPS18B, RPS14, RPS15, MRPL49, RPS12, RPS13, MRPL47, RPS11, UBA52, MRPL43, MRPS17, MRPS16, MRPS15, MRPS10, RPS26, RPS27, RPS28…	2244	168	12983	4.44255	1.09245e-60	1.09245e-60	1.15476e-60
	GOTERM_MF_FAT	GO:0003723~RNA binding	269	9.15901	3.02188e-40	RPL18, RPL19, RPL14, RPL13, LSM6, U2AF2, RPL15, SRP68, LSM7, RPLP2, NONO, DDX17, RBM8A, RPLP0, RPLP1, U2AF1, LSM5, FAU, LSM4, LSM3, RPL11, RPL12, LSM2, DHX30, LUC7L3, YARS, RPUSD4, SF3B14, AARS, RPS18, RPS19, PTRF, RPS16, ABT1, EIF2S1, RPS14, SERBP1, EIF2S2, RPS13, SRP72, RPS11, MCTS1, NHP2L1, PABPC4, ZCRB1, CALR, NAA38, RPS25, RPS26, HEXIM1, PABPC1, RPS20, SNRNP35, HNRNPAB, ZC3H14, DHX9, PAIP1, …	2244	718	12983	2.1676	4.78062e-37	2.39031e-37	5.05329e-37
	GOTERM_MF_FAT	GO:0003924~GTPase activity	94	3.20054	4.01313e-20	GNA13, HRAS, GNA15, RAB9A, RAB5B, RAB5C, GNA11, EIF5, ATL3, HBS1L, RHOQ, RAB1A, CDC42, ARHGAP5, SRPR, RALB, RHOA, TUBB6, RALA, RRAS, RHOC, TUBG1, RAB6A, TUBA1A, GNL2, GNG5, RHOF, TUBA1B, SAR1A, TUBA1C, RHOG, AGAP3, TUBB3, GTPBP2, RAP2B, RAP2A, ARL1, GTPBP4, OPA1, RAN, EFTUD2, RAB4A, EIF2S3, EEF2, GEM, MFN2, RND3, RAB18, GNB2, GNB1, RRAS2, GNAS, ARL8A, ARL8B, ARL4D, GBP3, ARL4C, RASD1, NKIRAS2, GB…	2244	211	12983	2.57749	6.34878e-17	2.11626e-17	6.71089e-17
	GOTERM_MF_FAT	GO:0005198~structural molecule activity	197	6.70752	2.30311e-18	RPL18, RPL17, MRPL42, RPL19, MRPL41, RPL14, VAPA, VAPB, RPL13, RPL15, RPLP2, RPL22L1, CD2AP, ACTG1, RPLP0, RPLP1, MRPL36, RPL26L1, RPL10, FAU, RPL11, RPL12, MRPL32, MRPL33, MRPL34, MRPL35, MRPL52, MRPL51, CTNNA1, KRT19, RPS18, KRT18, RPS19, RPS16, RPS14, RPS15, MRPL49, RPS12, RPS13, MRPL47, LAMC1, RPS11, MRPL43, LMNB1, RPS26, RPS27, LAMB3, LAMB2, RPS28, RPS29, MRPL55, RPS20, RPS21, RPS23, RPS24, …	2244	634	12983	1.79775	3.64352e-15	9.10881e-16	3.85134e-15
	GOTERM_MF_FAT	GO:0000166~nucleotide binding	527	17.9435	1.61838e-16	XRCC5, KIFC1, LDHB, HRAS, RP2, XRCC6, KIFC3, ACTG1, ILK, DHX30, YARS, OPA1, KIF5B, UBE2J1, EIF2S3, GEM, MARK3, MYH9, NME6, MAPK1, GLUL, NME2, EIF2AK1, SCYL1, NME1, MAPK3, MAPK9, MAPK8, YME1L1, ARL8A, ARL8B, HLA-DRA, ADSS, HSD17B10, GNAI3, GNAI2, PABPC4, UBA6, ZCRB1, ARF6, ARF5, ATP6V0B, HADHA, HADHB, DTD1, RAC2, RAC1, PABPC1, RPS24, DHX9, MAP2K1, MAP2K2, TGFBR2, GARS, UBE2L3, VDAC2, SEPT10, VDAC3…	2244	2245	12983	1.35815	1.75637e-13	3.5083e-14	1.88738e-13
	GOTERM_MF_FAT	GO:0005525~GTP binding	124	4.222	4.84986e-14	GNA13, GNA15, HRAS, SEPT2, RAB9A, GNA11, EIF5, HBS1L, RAB1B, RAB1A, RALB, RAB24, RALA, RRAS, TUBG1, EIF2B2, SAR1B, GNL2, SAR1A, GNL3, GTPBP2, GTPBP4, OPA1, SUCLG2, RAN, GTPBP5, EFTUD2, EIF2S3, OLA1, EEF2, GEM, RND3, NME2, RAB18, NME1, ARL8A, RAB12, ARL8B, RAB10, GBP3, SEPT7, GBP2, SEPT9, GBP1, GPN1, RAB7A, ADSS, GPN3, GNAI3, GNAI2, GLUD1, ARFRP1, RRAGA, ARF6, ARF5, TUBB, RAC2, RAC1, GMPPA, TRAF7,…	2244	372	12983	1.92855	7.67535e-11	1.27922e-11	8.11351e-11
	GOTERM_MF_FAT	GO:0032561~guanyl ribonucleotide binding	125	4.25604	1.70691e-13	GNA13, GNA15, HRAS, SEPT2, RAB9A, GNA11, EIF5, HBS1L, RAB1B, RAB1A, RALB, RAB24, RALA, RRAS, TUBG1, EIF2B2, SAR1B, GNL2, SAR1A, GNL3, GTPBP2, GTPBP4, OPA1, SUCLG2, RAN, GTPBP5, EFTUD2, EIF2S3, OLA1, EEF2, GEM, RND3, NME2, RAB18, NME1, ARL8A, RAB12, ARL8B, RAB10, GBP3, SEPT7, GBP2, SEPT9, GBP1, PRPS1, GPN1, RAB7A, ADSS, GPN3, GNAI3, GNAI2, GLUD1, ARFRP1, RRAGA, ARF6, ARF5, TUBB, RAC2, RAC1, GMPPA,…	2244	382	12983	1.89321	2.69955e-10	3.85649e-11	2.8535e-10
	GOTERM_MF_FAT	GO:0019001~guanyl nucleotide binding	125	4.25604	1.70691e-13	GNA13, GNA15, HRAS, SEPT2, RAB9A, GNA11, EIF5, HBS1L, RAB1B, RAB1A, RALB, RAB24, RALA, RRAS, TUBG1, EIF2B2, SAR1B, GNL2, SAR1A, GNL3, GTPBP2, GTPBP4, OPA1, SUCLG2, RAN, GTPBP5, EFTUD2, EIF2S3, OLA1, EEF2, GEM, RND3, NME2, RAB18, NME1, ARL8A, RAB12, ARL8B, RAB10, GBP3, SEPT7, GBP2, SEPT9, GBP1, PRPS1, GPN1, RAB7A, ADSS, GPN3, GNAI3, GNAI2, GLUD1, ARFRP1, RRAGA, ARF6, ARF5, TUBB, RAC2, RAC1, GMPPA,…	2244	382	12983	1.89321	2.69955e-10	3.85649e-11	2.8535e-10
	GOTERM_MF_FAT	GO:0008135~translation factor activity, nucleic acid binding	49	1.66837	4.64891e-13	ABCF1, EIF6, COPS5, HBS1L, EIF5, EIF5A, EIF2A, EIF1, EIF2B2, EIF2B5, GTF2H3, EIF2S3, EEF2, GTF2B, ELL2, EIF4G1, EIF4G2, EIF2AK1, EIF2S1, EIF4A2, EIF2S2, EIF4A1, EEF1G, EEF1D, TUFM, EEF1B2, ABTB1, EIF3D, EIF3B, EIF3G, EIF3H, ICT1, EIF3E, EIF3F, EIF3K, EIF3L, EIF3I, TCEA1, TCEA2, EIF3M, EEF1A1, DENR, ETF1, EIF4B, EIF4E, GSPT1, EIF4H, TCEB2, EIF4E2	2244	98	12983	2.89283	7.35393e-10	9.19241e-11	7.77334e-10
	GOTERM_MF_FAT	GO:0016655~oxidoreductase activity, acting on NADH or NADPH, quinone or similar compound as acceptor	32	1.08955	8.64676e-13	NDUFB3, NDUFB4, NDUFB6, NDUFB7, NDUFB8, NDUFAB1, NDUFAF2, NDUFB2, NDUFS7, NDUFS6, NDUFS5, TP53I3, NDUFS4, NDUFS8, GSTO1, NQO1, NDUFS2, NDUFS1, NDUFA4, NDUFA2, NDUFA3, NDUFB10, NDUFA8, NDUFA7, NDUFC2, NDUFA13, NDUFC1, NDUFA10, NDUFA1, NDUFA12, NDUFV1, NDUFV2	2244	49	12983	3.77838	1.36786e-09	1.51985e-10	1.44588e-09
	GOTERM_MF_FAT	GO:0032555~purine ribonucleotide binding	426	14.5046	2.10458e-12	XRCC5, KIFC1, HRAS, RP2, XRCC6, KIFC3, ACTG1, ILK, DHX30, YARS, OPA1, KIF5B, UBE2J1, EIF2S3, GEM, MARK3, MYH9, NME6, MAPK1, GLUL, NME2, EIF2AK1, SCYL1, NME1, MAPK3, MAPK9, ARL8A, YME1L1, MAPK8, ARL8B, HLA-DRA, ADSS, GNAI3, GNAI2, UBA6, ARF6, ARF5, ATP6V0B, DTD1, RAC2, RAC1, DHX9, MAP2K1, MAP2K2, TGFBR2, GARS, UBE2L3, SEPT10, SEPT11, ARF1, NOLC1, UBA1, ARF3, UBA2, UBA3, ARF4, HSPA13, SEPHS1, NUAK1…	2244	1836	12983	1.34242	3.32938e-09	3.32938e-10	3.51927e-09
	GOTERM_MF_FAT	GO:0032553~ribonucleotide binding	426	14.5046	2.10458e-12	XRCC5, KIFC1, HRAS, RP2, XRCC6, KIFC3, ACTG1, ILK, DHX30, YARS, OPA1, KIF5B, UBE2J1, EIF2S3, GEM, MARK3, MYH9, NME6, MAPK1, GLUL, NME2, EIF2AK1, SCYL1, NME1, MAPK3, MAPK9, ARL8A, YME1L1, MAPK8, ARL8B, HLA-DRA, ADSS, GNAI3, GNAI2, UBA6, ARF6, ARF5, ATP6V0B, DTD1, RAC2, RAC1, DHX9, MAP2K1, MAP2K2, TGFBR2, GARS, UBE2L3, SEPT10, SEPT11, ARF1, NOLC1, UBA1, ARF3, UBA2, UBA3, ARF4, HSPA13, SEPHS1, NUAK1…	2244	1836	12983	1.34242	3.32938e-09	3.32938e-10	3.51927e-09
	GOTERM_MF_FAT	GO:0003954~NADH dehydrogenase activity	29	0.987402	3.93216e-12	NDUFB3, NDUFB4, NDUFB6, NDUFB7, NDUFB8, NDUFAB1, NDUFAF2, NDUFB2, NDUFS7, NDUFS6, NDUFS5, NDUFS4, NDUFS8, NDUFS2, NDUFS1, NDUFA4, NDUFA2, NDUFA3, NDUFB10, NDUFA8, NDUFA7, NDUFC2, NDUFA13, NDUFC1, NDUFA10, NDUFA1, NDUFA12, NDUFV1, NDUFV2	2244	43	12983	3.90195	6.22072e-09	5.6552e-10	6.57553e-09
	GOTERM_MF_FAT	GO:0008137~NADH dehydrogenase (ubiquinone) activity	29	0.987402	3.93216e-12	NDUFB3, NDUFB4, NDUFB6, NDUFB7, NDUFB8, NDUFAB1, NDUFAF2, NDUFB2, NDUFS7, NDUFS6, NDUFS5, NDUFS4, NDUFS8, NDUFS2, NDUFS1, NDUFA4, NDUFA2, NDUFA3, NDUFB10, NDUFA8, NDUFA7, NDUFC2, NDUFA13, NDUFC1, NDUFA10, NDUFA1, NDUFA12, NDUFV1, NDUFV2	2244	43	12983	3.90195	6.22072e-09	5.6552e-10	6.57553e-09
	GOTERM_MF_FAT	GO:0050136~NADH dehydrogenase (quinone) activity	29	0.987402	3.93216e-12	NDUFB3, NDUFB4, NDUFB6, NDUFB7, NDUFB8, NDUFAB1, NDUFAF2, NDUFB2, NDUFS7, NDUFS6, NDUFS5, NDUFS4, NDUFS8, NDUFS2, NDUFS1, NDUFA4, NDUFA2, NDUFA3, NDUFB10, NDUFA8, NDUFA7, NDUFC2, NDUFA13, NDUFC1, NDUFA10, NDUFA1, NDUFA12, NDUFV1, NDUFV2	2244	43	12983	3.90195	6.22072e-09	5.6552e-10	6.57553e-09
	GOTERM_MF_FAT	GO:0051082~unfolded protein binding	52	1.77051	1.05889e-11	PTGES3, HSP90AB1, COPA, GRPEL1, RP2, VBP1, CCT2, CCT3, CANX, AIP, TAPBP, DNAJB11, SLMAP, DNAJC5, PDRG1, HSP90AA1, CCT6A, LRPAP1, TRAP1, PFDN2, UXT, PFDN1, PFDN6, TBCA, PFDN5, PFDN4, TOMM20, SIL1, RUVBL2, LMAN1, CALR, SERPINH1, CDC37, NPM1, TOR1A, DNAJA1, HSPE1, HSPA5, HSPA8, HSPA9, DNAJA2, TCP1, CCT7, CCT5, HSP90B1, CCT4, PPIB, PPIA, PPIC, CCT8, DNAJB1, HSPD1	2244	115	12983	2.61612	1.67516e-08	1.39597e-09	1.7707e-08
	GOTERM_MF_FAT	GO:0017076~purine nucleotide binding	438	14.9132	1.15993e-11	XRCC5, KIFC1, HRAS, RP2, XRCC6, KIFC3, ACTG1, ILK, DHX30, YARS, OPA1, KIF5B, UBE2J1, EIF2S3, GEM, MARK3, MYH9, NME6, MAPK1, GLUL, NME2, EIF2AK1, SCYL1, NME1, MAPK3, MAPK9, ARL8A, YME1L1, MAPK8, ARL8B, HLA-DRA, ADSS, GNAI3, GNAI2, UBA6, ARF6, ARF5, ATP6V0B, DTD1, RAC2, RAC1, DHX9, MAP2K1, MAP2K2, TGFBR2, GARS, UBE2L3, SEPT10, SEPT11, ARF1, NOLC1, UBA1, ARF3, UBA2, UBA3, ARF4, HSPA13, SEPHS1, NUAK1…	2244	1918	12983	1.32123	1.83502e-08	1.41156e-09	1.93969e-08
	GOTERM_MF_FAT	GO:0016651~oxidoreductase activity, acting on NADH or NADPH	42	1.43003	1.65307e-11	NDUFB3, CYB5R3, NDUFB4, NDUFB6, GMPR2, NDUFB7, NDUFB8, NDUFAB1, PRDX3, NDUFAF2, NDUFB2, NDUFS7, NDUFS6, NDUFS5, TP53I3, NDUFS4, NDUFS8, GSTO1, NQO1, NDUFS2, NDUFS1, NQO2, NDUFA4, NDUFA2, NDUFA3, NDUFB10, NDUFA8, NDUFA7, NDUFC2, NDUFA13, NDUFC1, NDUFA10, CYB561, NDUFA1, NDUFA12, NNT, NXN, TXNDC17, NDUFV1, DLD, NDUFV2, TXNRD1	2244	83	12983	2.92768	2.61515e-08	1.86797e-09	2.76431e-08
	GOTERM_MF_FAT	GO:0015078~hydrogen ion transmembrane transporter activity	44	1.49813	2.17823e-11	ATP5E, COX11, ATP6V0E1, UQCRC1, ATP5B, ATP6AP1, COX6A1P2, COX7B, COX7C, ATP5G2, ATP5G1, ATP6V1G1, ATP6V1B2, COX7A2L, UQCRFS1, UQCRQ, COX5B, ATP5G3, ATP6V0B, UQCR10, UQCR11, ATP5S, COX6B1, ATP5L, ATP5O, ATP5I, ATP5H, ATP5J, COX8A, ATP5F1, COX4I1, CYB5A, ATP6V1D, ATP6V1F, UQCRHL, COX6C, ATP6V1C1, ATP6V1A, NNT, UQCRH, ATP6V1E1, ATP5C1, COX6A1, ATP5A1, UQCRB	2244	90	12983	2.82854	3.44597e-08	2.29731e-09	3.64252e-08
	GOTERM_MF_FAT	GO:0042802~identical protein binding	175	5.95846	9.06368e-11	S100A4, LDHB, S100A6, GRPEL1, NRBP1, ZAK, IL6ST, VAPB, HMGCR, PDGFA, TPD52, AMOTL2, TGFB2, MAGED1, NONO, ACTG1, BAK1, DPY30, GSTM3, APP, FTL, EGFR, CARS, PDXK, STK25, ACTN4, PCBD1, PPP1CC, MYH9, STK4, NME2, GLUL, EIF2AK1, MAD2L1, NME1, PSMA4, VEGFA, HSPB1, CLIP1, ATPIF1, SNRPC, EXT1, EXT2, PRPS1, ALDOA, CAV2, HSD17B10, CLCN3, CAV1, OSTF1, ENPP1, SNX6, STRAP, GLUD1, RRAGA, NFKBIA, C14ORF166, BCL2L…	2244	640	12983	1.58201	1.43387e-07	8.96172e-09	1.51566e-07
	GOTERM_MF_FAT	GO:0015077~monovalent inorganic cation transmembrane transporter activity	45	1.53218	1.71565e-09	ATP5E, COX11, ATP6V0E1, UQCRC1, ATP5B, ATP6AP1, COX6A1P2, COX7B, COX7C, ATP5G2, ATP5G1, ATP6V1G1, ATP6V1B2, COX7A2L, UQCRFS1, UQCRQ, COX5B, ATP5G3, ATP6V0B, UQCR10, UQCR11, ATP5S, COX6B1, ATP5L, ATP5O, ATP5I, ATP5H, ATP5J, COX8A, ATP5F1, COX4I1, ATP1A1, CYB5A, ATP6V1D, ATP6V1F, UQCRHL, COX6C, ATP6V1C1, ATP6V1A, NNT, UQCRH, ATP6V1E1, ATP5C1, COX6A1, ATP5A1, UQCRB	2244	104	12983	2.50341	2.71416e-06	1.59657e-07	2.86897e-06
	GOTERM_MF_FAT	GO:0008565~protein transporter activity	39	1.32789	7.53646e-09	XPO1, ARFGAP3, XPO6, SNX15, MCL1, XPO5, TIMM17A, AP2S1, TSNAX, TIMM17B, SNX2, SEC62, AP1S1, AP2B1, TOMM7, CSE1L, TOMM5, TNPO2, TNPO1, KPNB1, SEC61A1, SNUPN, RAB4A, IPO9, TIMM23, TIMM44, SEC61B, IPO7, AP2A1, IPO5, TOMM20, USO1, NUTF2, TOMM22, KPNA4, XPO7, KPNA2, VPS26A, SEC61G	2244	87	12983	2.59357	1.19226e-05	6.62371e-07	1.26027e-05
	GOTERM_MF_FAT	GO:0003743~translation initiation factor activity	31	1.0555	9.85403e-09	EIF6, COPS5, EIF5, EIF2A, EIF3D, EIF3B, EIF3G, EIF3H, EIF3E, EIF3F, EIF3K, EIF3L, EIF1, EIF3I, EIF2B2, EIF3M, EIF2B5, EIF2S3, DENR, GTF2B, EIF4G1, EIF4B, EIF4G2, EIF2AK1, EIF4E, EIF2S1, EIF4H, EIF4A2, EIF4A1, EIF2S2, EIF4E2	2244	61	12983	2.94025	1.55889e-05	8.20477e-07	1.64782e-05
	GOTERM_MF_FAT	GO:0019899~enzyme binding	142	4.83487	1.06244e-08	VAPB, SNRPD3, PDLIM5, U2AF2, PGAM1, CBX3, AURKA, CBX1, PRKCSH, UBQLN1, IQGAP1, CTNNB1, CUL7, CDKN2C, CDKN2D, SERPINE1, SLC2A1, LUC7L2, H2AFX, PRKACA, LSM2, ACIN1, SUPT5H, ADAM9, CUTA, EGFR, BCL10, CD40, PPP1CC, IRS1, PPP1CB, PLAUR, SPAG9, MAPK1, PA2G4, HIF1A, NPC2, F3, CSTB, ATPIF1, AKAP2, CAV2, EID1, CAV1, NEK2, NFKBIA, SNX3, FTH1, PFN1, CDC42EP2, RAC1, RHOBTB3, GABARAPL2, MAP2K1, TAF7, TGFBR2, …	2244	523	12983	1.57086	1.68076e-05	8.40388e-07	1.77664e-05
	GOTERM_MF_FAT	GO:0070003~threonine-type peptidase activity	16	0.544774	2.2626e-08	PSMA7, PSMB8, PSMB9, PSMB5, PSMA2, PSMA1, PSMB4, PSMB7, PSMB6, PSMA6, PSMB1, PSMA5, PSMA4, PSMB3, PSMB2, PSMA3	2244	20	12983	4.62852	3.57936e-05	1.62701e-06	3.78358e-05
	GOTERM_MF_FAT	GO:0004298~threonine-type endopeptidase activity	16	0.544774	2.2626e-08	PSMA7, PSMB8, PSMB9, PSMB5, PSMA2, PSMA1, PSMB4, PSMB7, PSMB6, PSMA6, PSMB1, PSMA5, PSMA4, PSMB3, PSMB2, PSMA3	2244	20	12983	4.62852	3.57936e-05	1.62701e-06	3.78358e-05
	GOTERM_MF_FAT	GO:0003729~mRNA binding	32	1.08955	2.24529e-08	HSD3B7, PABPC4, RBM5, RPL35, CALR, RPS3, ZFP36L1, RPS26, RPL7, RBM8A, HNRNPD, PABPC1, HNRNPC, RBM25, LUC7L3, HNRNPAB, ACO1, GRSF1, ELAVL1, RNPS1, SSB, TSN, RPS5, SLBP, HNRPDL, EIF4A3, SERBP1, RPS14, EIF4A1, SLU7, RPS13, CELF1	2244	66	12983	2.80516	3.55198e-05	1.69145e-06	3.75464e-05
	GOTERM_MF_FAT	GO:0046961~proton-transporting ATPase activity, rotational mechanism	17	0.578822	4.3106e-08	ATP5E, ATP6V0E1, ATP5B, ATP6AP1, ATP5F1, ATP6V1B2, ATP5G1, ATP6V1D, ATP6V0B, ATP6V1F, ATP6V1C1, ATP6V1A, ATP6V1E1, ATP5C1, ATP5O, ATP5A1, ATP5J	2244	23	12983	4.27635	6.81914e-05	2.96494e-06	7.20833e-05
	GOTERM_MF_FAT	GO:0043021~ribonucleoprotein binding	21	0.715015	6.04079e-08	ABCF1, EIF6, RPSA, PRPF31, RBM3, SRP68, NAA15, EIF5A, ERI1, EIF2A, ETF1, SEC61B, SRPR, NAA10, PRMT5, NPM1, EIF3K, SRP72, HSPA5, SEC61A1, SRP9	2244	34	12983	3.57349	9.55608e-05	3.98188e-06	0.000101016
	GOTERM_MF_FAT	GO:0019829~cation-transporting ATPase activity	21	0.715015	2.22543e-07	ATP5E, ATP6V0E1, ATP5B, ATP6AP1, ATP5F1, ATP6V1B2, ATP5G1, ATP6V1D, ATP6V0B, ATP6V1F, ATP6V1C1, ATP6V1A, ATP2B4, ATP2A2, ATP2C1, ATP6V1E1, ATP5C1, ATP5O, ATP5A1, ASNA1, ATP5J	2244	36	12983	3.37496	0.000352001	1.40824e-05	0.000372142
	GOTERM_MF_FAT	GO:0016887~ATPase activity	95	3.23459	4.0065e-07	XRCC5, ABCF1, ATP5E, ATP1B1, ATP6V0E1, ABCF2, ATP5B, ATP6AP1, XRCC6, TAPBP, DDX27, DDX17, LONP1, ATP2B4, DDX24, ATP5L, ATP5O, DDX21, ACIN1, DYNC1H1, PSMD6, DHX30, ATP5I, TOP2A, ATP5H, ATP5J, ABCE1, RALBP1, CCNH, G3BP1, GTF2H4, GTF2H3, CDK7, MYH9, ATP6V1D, ATP6V1F, ATP6V1C1, EIF4A3, ATP6V1A, ATP2C1, EIF4A2, FBXO18, SNRNP200, EIF4A1, ATP5C1, RUVBL2, RUVBL1, SMARCA1, MYL6, SKIV2L, CETN2, ATP5G1, ATP…	2244	334	12983	1.64562	0.000633628	2.43777e-05	0.000669978
	GOTERM_MF_FAT	GO:0019843~rRNA binding	18	0.61287	6.47427e-07	MRPS17, GAR1, RPS9, ERI1, RPL37, MRPS6, RPL23A, RPS4X, RPF1, RPS18, SBDS, PTRF, RPL9, NPM1, RPL8, RPL5, RPL11, RPS11	2244	29	12983	3.59109	0.00102371	3.79337e-05	0.00108264
	GOTERM_MF_FAT	GO:0022890~inorganic cation transmembrane transporter activity	51	1.73647	1.55054e-06	ATP5E, ATP6V0E1, COX11, UQCRC1, COX6A1P2, ATP6AP1, ATP5B, UQCRFS1, COX5B, UQCRQ, UQCR10, UQCR11, ATP2B4, ATP5S, ATP5L, ATP5O, ATP5I, ATP5H, ATP5J, COX4I1, CYB5A, ATP6V1D, COX6C, ATP6V1F, ATP6V1C1, ATP6V1A, NNT, UQCRH, ATP2C1, ATP5C1, SLC25A37, UQCRB, COX7B, COX7C, ATP5G2, ATP6V1G1, COX7A2L, ATP6V1B2, ATP5G1, ATP5G3, ATP6V0B, COX6B1, CCS, SLC39A1, COX8A, ATP5F1, ATP1A1, UQCRHL, ATP2A2, ATP6V1E1, C…	2244	151	12983	1.95409	0.00244995	8.76017e-05	0.00259283
	GOTERM_MF_FAT	GO:0046983~protein dimerization activity	137	4.66462	1.70758e-06	S100A6, GRPEL1, NRBP1, VAPA, IL6ST, VAPB, HMGCR, PDGFA, CNDP2, SAE1, TPD52, TGFB2, RGL2, BAK1, ATF6B, SUPT5H, CUTA, EGFR, CARS, CAPNS1, PDXK, ACTN4, MYH9, STK4, DDIT3, JUNB, EIF2AK1, HIF1A, MAD2L1, VEGFA, SDCBP, CLIP1, NFE2L1, ATPIF1, SNRPC, NFE2L2, EXT1, NFE2L3, EXT2, PRPS1, CAV2, CLCN3, PANX1, ENPP1, MCL1, SNX6, RRAGA, BCL2L1, ITGB1, PEF1, RPL7, NPM1, PVRL2, GALE, CREBL2, S100A16, ACY1, LGALS1,…	2244	542	12983	1.46242	0.00269774	9.31469e-05	0.00285542
	GOTERM_MF_FAT	GO:0051287~NAD or NADH binding	23	0.783112	2.65029e-06	LDHB, HSD17B10, CTBP1, CTBP2, SORD, GLUD1, ADH5, GRHPR, HIBADH, HADHA, SIRT2, IDH3A, HADHB, NNT, IDH3G, NDUFV1, DLD, NDUFV2, IDH1, PARP1, NDUFS2, GAPDH, MDH1	2244	47	12983	2.83128	0.00418398	0.000139749	0.0044318
	GOTERM_MF_FAT	GO:0008134~transcription factor binding	129	4.39224	4.66322e-06	MMS19, HMGN3, RBM4, PDLIM1, ANKRD1, MXI1, RAB1A, AIP, CITED2, RGL2, CTNNB1, MAGED1, SND1, PQBP1, DDAH2, CUTA, BCL10, PCBD1, RAN, MECP2, PIM1, STK4, DDIT3, JUNB, HIF1A, RAB18, SMARCE1, ABT1, MED17, TGIF1, EDF1, NFE2L1, NFE2L3, ZNHIT3, HMGB1, EID1, TADA3, NFKBIA, NR1H2, DRAP1, NPM1, SUPT7L, TAF9, TFDP1, SUB1, CFB, TAF7, SRA1, SAP18, SMAD3, PMF1, DDX5, ATF6, ATF3, HDAC2, PSMC5, RNF4, HDAC1, ETS1, PS…	2244	513	12983	1.45487	0.00735009	0.000237947	0.0077977
	GOTERM_MF_FAT	GO:0046933~hydrogen ion transporting ATP synthase activity, rotational mechanism	12	0.40858	7.44318e-06	ATP6V1A, ATP5E, ATP5B, ATP6AP1, ATP5F1, ATP5C1, ATP5O, ATP5G1, ATP6V1B2, ATP5A1, ATP6V1F, ATP5J	2244	16	12983	4.33924	0.0117061	0.000367906	0.012446
	GOTERM_MF_FAT	GO:0005524~ATP binding	316	10.7593	1.12129e-05	XRCC5, DYNC1LI1, KIFC1, RP2, XRCC6, CCT2, AURKA, AURKB, CCT3, RAB1A, KIFC3, ACTG1, DDX17, ATP2B4, ILK, EIF2B2, DHX30, YARS, KIF5B, SUCLG2, AARS, PIM1, UBE2J1, TBRG4, OLA1, MARK3, MYH9, NME6, MAPK1, GLUL, NME2, EIF2AK1, RAB18, SCYL1, ATP2C1, NME1, RARS, MAPK3, HARS, MAPK9, YME1L1, MAPK8, NEK6, HLA-DRA, NEK7, CLCN3, ENPP1, NEK2, STK17B, UBA6, ADRBK1, CDC34, STK17A, ATP6V0B, TK1, DTD1, VRK1, SNRNP35…	2244	1477	12983	1.23782	0.0175824	0.000537396	0.0187488
	GOTERM_MF_FAT	GO:0042623~ATPase activity, coupled	76	2.58767	1.29492e-05	XRCC5, ABCF1, ATP5E, ATP1B1, ATP6V0E1, ATP6AP1, ATP5B, XRCC6, TAPBP, DDX27, DDX17, LONP1, ATP2B4, DDX24, DDX21, ATP5O, DYNC1H1, DHX30, TOP2A, ATP5J, RALBP1, CCNH, G3BP1, GTF2H4, GTF2H3, CDK7, MYH9, ATP6V1D, ATP6V1F, ATP6V1C1, ATP6V1A, EIF4A3, ATP2C1, EIF4A2, FBXO18, SNRNP200, EIF4A1, ATP5C1, RUVBL2, SMARCA1, MYL6, SKIV2L, CETN2, ATP5G1, ATP6V1G1, ATP6V1B2, ATP6V0B, DDX47, DDX46, DDX49, DDX3X, TAP…	2244	272	12983	1.61658	0.0202773	0.000602339	0.0216518
	GOTERM_MF_FAT	GO:0032559~adenyl ribonucleotide binding	318	10.8274	1.85663e-05	XRCC5, DYNC1LI1, KIFC1, RP2, XRCC6, CCT2, AURKA, AURKB, CCT3, RAB1A, KIFC3, ACTG1, DDX17, ATP2B4, ILK, EIF2B2, DHX30, YARS, KIF5B, SUCLG2, AARS, PIM1, UBE2J1, TBRG4, OLA1, MARK3, MYH9, NME6, MAPK1, GLUL, NME2, EIF2AK1, RAB18, SCYL1, ATP2C1, NME1, RARS, MAPK3, HARS, MAPK9, YME1L1, MAPK8, NEK6, HLA-DRA, NEK7, CLCN3, ENPP1, NEK2, STK17B, UBA6, ADRBK1, CDC34, STK17A, ATP6V0B, TK1, DTD1, VRK1, SNRNP35…	2244	1497	12983	1.22902	0.028945	0.000838853	0.0310426
	GOTERM_MF_FAT	GO:0005048~signal sequence binding	13	0.442629	2.19275e-05	KDELR3, KDELR2, SRP14, NFKBIA, SSR1, TNPO2, KPNB1, KDELR1, TNPO1, KPNA2, SSR2, TOMM34, SSR3	2244	20	12983	3.76067	0.0340948	0.000963137	0.0366615
	GOTERM_MF_FAT	GO:0051087~chaperone binding	14	0.476677	2.40431e-05	DLST, GRPEL1, TP53, BIRC5, CALR, SOD1, TBCA, PFDN6, TBCC, PFDN4, HSPE1, HSPD1, AHSA1, DNAJB6	2244	23	12983	3.5217	0.0373223	0.00100046	0.040198
	GOTERM_MF_FAT	GO:0003724~RNA helicase activity	16	0.544774	2.35725e-05	DHX9, SKIV2L, G3BP1, DDX1, DDX5, DDX6, EIF4A3, DDX17, DDX56, DDX47, DDX3X, DDX24, DHX15, DHX16, DDX21, DDX54	2244	29	12983	3.19208	0.0366053	0.00100739	0.0394113
	GOTERM_MF_FAT	GO:0004576~oligosaccharyl transferase activity	9	0.306435	2.53616e-05	STT3B, OSTC, MAGT1, STT3A, DAD1, RPN1, ALG5, RPN2, DDOST	2244	10	12983	5.20709	0.0393283	0.00102825	0.042402
	GOTERM_MF_FAT	GO:0051920~peroxiredoxin activity	8	0.272387	3.09687e-05	PRDX6, SEP15, PRDX4, PRDX5, PRDX2, PRDX3, PRDX1, PARK7	2244	8	12983	5.78565	0.0478125	0.00122408	0.0517743
	GOTERM_MF_FAT	GO:0043022~ribosome binding	12	0.40858	3.85757e-05	EIF6, RPSA, SEC61B, NAA10, NAA15, EIF3K, EIF5A, ERI1, EIF2A, HSPA5, ETF1, SEC61A1	2244	18	12983	3.8571	0.0592031	0.00148738	0.064488
	GOTERM_MF_FAT	GO:0030554~adenyl nucleotide binding	330	11.236	4.71537e-05	XRCC5, DYNC1LI1, KIFC1, RP2, XRCC6, CCT2, AURKA, AURKB, CCT3, RAB1A, KIFC3, ACTG1, DDX17, ATP2B4, ILK, EIF2B2, DHX30, YARS, KIF5B, SUCLG2, AARS, PIM1, UBE2J1, TBRG4, OLA1, MARK3, MYH9, NME6, MAPK1, GLUL, NME2, EIF2AK1, RAB18, SCYL1, ATP2C1, NME1, RARS, MAPK3, DLD, HARS, MAPK9, YME1L1, MAPK8, NEK6, NEK7, HLA-DRA, CLCN3, ENPP1, NEK2, STK17B, UBA6, ADRBK1, CDC34, STK17A, ATP6V0B, TK1, DTD1, VRK1, SN…	2244	1577	12983	1.21069	0.0718843	0.00177459	0.0788227
	GOTERM_MF_FAT	GO:0015399~primary active transmembrane transporter activity	40	1.36193	5.17214e-05	ABCF1, ATP5E, ATP6V0E1, ATP1B1, ATP5B, TIMM17A, ATP6AP1, TIMM17B, ATP5G1, ATP6V1B2, ATP6V1G1, ATP6V0B, TAPBP, ATP2B4, TOMM7, TAP2, TAP1, ATP5O, SNRNP35, SEC61A1, ATP5J, ATP5F1, ATP1A1, TIMM23, ATP13A3, TIMM44, ATP6V1D, ATP6V1F, ATP6V1C1, ATP6V1A, SEC61B, ATP2A2, ATP2C1, ATP6V1E1, ATP5C1, TOMM20, TRPC4AP, ATP5A1, ASNA1, SEC61G	2244	122	12983	1.89693	0.0785671	0.00190111	0.086455
	GOTERM_MF_FAT	GO:0015405~P-P-bond-hydrolysis-driven transmembrane transporter activity	40	1.36193	5.17214e-05	ABCF1, ATP5E, ATP6V0E1, ATP1B1, ATP5B, TIMM17A, ATP6AP1, TIMM17B, ATP5G1, ATP6V1B2, ATP6V1G1, ATP6V0B, TAPBP, ATP2B4, TOMM7, TAP2, TAP1, ATP5O, SNRNP35, SEC61A1, ATP5J, ATP5F1, ATP1A1, TIMM23, ATP13A3, TIMM44, ATP6V1D, ATP6V1F, ATP6V1C1, ATP6V1A, SEC61B, ATP2A2, ATP2C1, ATP6V1E1, ATP5C1, TOMM20, TRPC4AP, ATP5A1, ASNA1, SEC61G	2244	122	12983	1.89693	0.0785671	0.00190111	0.086455
	GOTERM_MF_FAT	GO:0001882~nucleoside binding	336	11.4402	5.49707e-05	XRCC5, DYNC1LI1, KIFC1, RP2, XRCC6, CCT2, AURKA, AURKB, CCT3, RAB1A, KIFC3, ACTG1, DDX17, ATP2B4, ILK, EIF2B2, DHX30, YARS, KIF5B, SUCLG2, AARS, PIM1, UBE2J1, TBRG4, OLA1, GEM, MARK3, MYH9, NME6, MAPK1, GLUL, NME2, EIF2AK1, RAB18, SCYL1, ATP2C1, NME1, RARS, MAPK3, DLD, HARS, MAPK9, YME1L1, MAPK8, ARL8B, NEK6, NEK7, HLA-DRA, CLCN3, ENPP1, NEK2, STK17B, UBA6, ADRBK1, CDC34, STK17A, ATP6V0B, TK1, DT…	2244	1612	12983	1.20594	0.0832918	0.00197455	0.0918841
	GOTERM_MF_FAT	GO:0001883~purine nucleoside binding	333	11.3381	7.21471e-05	XRCC5, DYNC1LI1, KIFC1, RP2, XRCC6, CCT2, AURKA, AURKB, CCT3, RAB1A, KIFC3, ACTG1, DDX17, ATP2B4, ILK, EIF2B2, DHX30, YARS, KIF5B, SUCLG2, AARS, PIM1, UBE2J1, TBRG4, OLA1, GEM, MARK3, MYH9, NME6, MAPK1, GLUL, NME2, EIF2AK1, RAB18, SCYL1, ATP2C1, NME1, RARS, MAPK3, DLD, HARS, MAPK9, YME1L1, MAPK8, ARL8B, NEK6, NEK7, HLA-DRA, CLCN3, ENPP1, NEK2, STK17B, UBA6, ADRBK1, CDC34, STK17A, ATP6V0B, TK1, DT…	2244	1601	12983	1.20339	0.107868	0.00253325	0.120578
	GOTERM_MF_FAT	GO:0050662~coenzyme binding	53	1.80456	8.42307e-05	LDHB, HMGCR, OGDH, UXS1, ACBD5, HIBADH, TP53I3, ACOT7, IDH3G, CAT, HADH, NQO1, NDUFS2, DUS1L, DHCR24, NQO2, ALDH6A1, CTBP1, ACADM, CTBP2, AIFM1, HMBS, GRHPR, ACADVL, NNT, DLD, TXNRD1, MDH1, HSD17B10, SORD, GLUD1, ADH5, HADHA, HADHB, ILVBL, IDH1, GALE, TSTA3, ERO1L, PDHX, GAPDH, ETFA, DLST, DLAT, DBI, IDH3A, SIRT2, SDHA, TXNDC12, NDUFV1, NDUFV2, BLVRB, PARP1	2244	181	12983	1.69414	0.124761	0.00289273	0.14076
	GOTERM_MF_FAT	GO:0016667~oxidoreductase activity, acting on sulfur group of donors	18	0.61287	0.000110713	TXNL1, GLRX3, TMX1, PTGES2, AIFM1, TXN2, PRDX3, MSRB3, GLRX2, TXNDC12, TXNDC17, NXN, DLD, TXNRD1, SH3BGRL3, ERO1L, QSOX1, GLRX	2244	39	12983	2.6703	0.160676	0.00371984	0.184978
	GOTERM_MF_FAT	GO:0004579~dolichyl-diphosphooligosaccharide-protein glycotransferase activity	8	0.272387	0.000118405	STT3B, OSTC, MAGT1, STT3A, DAD1, RPN1, RPN2, DDOST	2244	9	12983	5.1428	0.170828	0.00381571	0.197816
	GOTERM_MF_FAT	GO:0019206~nucleoside kinase activity	10	0.340483	0.00011711	ADK, DTYMK, AK2, UCKL1, UCK1, UCK2, DGUOK, GUK1, CMPK1, TK1	2244	14	12983	4.13261	0.169128	0.00385254	0.195655
	GOTERM_MF_FAT	GO:0035257~nuclear hormone receptor binding	28	0.953354	0.000128347	MMS19, HMGN3, FKBP4, PPARG, FHL2, CALR, DAXX, RGL2, CTNNB1, NR1H2, TRIP12, CUTA, RAN, TAF7, CDK7, HMGA1, PRPF6, TAF11, YWHAH, RNF4, NCOA4, PFDN6, MED17, PHB2, THRAP3, DDX54, TOB2, ZNHIT3	2244	77	12983	2.10387	0.18377	0.00405294	0.21441
	GOTERM_MF_FAT	GO:0019205~nucleobase, nucleoside, nucleotide kinase activity	19	0.646919	0.000132191	MPP1, RP2, DTYMK, AK3, AK2, CASK, DGUOK, CMPK1, TK1, NME6, NME2, NME1-NME2, NME1, ADK, DLG3, UCKL1, UCK1, TAF9, UCK2, GUK1, DLG1	2244	43	12983	2.55645	0.188718	0.00409239	0.220825
	GOTERM_MF_FAT	GO:0047485~protein N-terminus binding	27	0.919305	0.00016371	MORF4L1, HAX1, ALG2, PDLIM5, EIF5A, DAXX, CSNK2A1, PEX19, EIF3E, RPS21, ERCC2, GLRX, TBL1XR1, STX5, ACTN4, TP53, MECP2, GTF2H3, DCTN4, TAF11, MNAT1, SMARCE1, ZWINT, YWHAQ, CALM3, SDCBP, PARP1, CALM2, CALM1	2244	74	12983	2.11098	0.228184	0.00496857	0.273408
	GOTERM_MF_FAT	GO:0003746~translation elongation factor activity	13	0.442629	0.00023772	TUFM, EEF1A1, EEF1B2, ABTB1, HBS1L, EIF5A, EEF2, ELL2, TCEB2, EEF1G, TCEA1, TCEA2, EEF1D	2244	24	12983	3.13389	0.313479	0.00707144	0.396781
	GOTERM_MF_FAT	GO:0051427~hormone receptor binding	30	1.02145	0.000253937	MMS19, HMGN3, FKBP4, PPARG, FHL2, CALR, DAXX, RGL2, CTNNB1, NR1H2, TRIP12, CUTA, RAN, TAF7, CDK7, HMGA1, PRPF6, PTPN11, TAF11, YWHAH, PSMC5, RNF4, NCOA4, PFDN6, MED17, PHB2, THRAP3, DDX54, TOB2, ZNHIT3	2244	88	12983	1.97238	0.330872	0.00741275	0.423795
	GOTERM_MF_FAT	GO:0008320~protein transmembrane transporter activity	11	0.374532	0.000263427	SEC61B, TOMM7, MCL1, TIMM17A, TIMM17B, TOMM20, TOMM22, TIMM23, TIMM44, SEC61A1, SEC61G	2244	18	12983	3.53568	0.340845	0.00741517	0.4396
	GOTERM_MF_FAT	GO:0019787~small conjugating protein ligase activity	48	1.63432	0.000261899	TMEM189-UBE2V1, TSG101, UBE2G1, RLIM, UBE2A, ANAPC5, UBE2J1, UBR2, UBE2I, UBE2H, UBE2C, UBE2B, UBE2N, HUWE1, UBE2K, UBE2M, UBL4A, FBXL5, UBE2S, ZER1, UBE2T, UBE2V1, UBE2V2, ANAPC10, CDC34, ANAPC11, UBE3C, STUB1, RBX1, UBE2R2, SUMO3, SUMO2, UBE2D3, UBE2D2, FBXW2, NEDD4L, TRAF7, FBXW11, TRIP12, FBXO7, UBE2L6, UBE2L3, TSPAN17, RNF8, UBE2E3, NOSIP, ZRANB1, SMURF2, UBE2E2, UBE2E1	2244	166	12983	1.67296	0.339249	0.00750585	0.437056
	GOTERM_MF_FAT	GO:0042803~protein homodimerization activity	83	2.82601	0.000407774	GRPEL1, S100A6, NRBP1, IL6ST, VAPB, PDGFA, HMGCR, HEXB, BNIP3, TPD52, DAXX, TGFB2, GSS, TP53I3, TRIM8, GTF2A2, CAT, GOLGA5, TOP2A, IRAK2, IRAK1, CARS, HSP90AA1, SP100, PDXK, ADAM10, ACTN4, LDB1, MYH9, STK4, FLNA, TARS, ADRB2, EIF2AK1, MAD2L1, VEGFA, CLIP1, ATPIF1, SNRPC, EXT1, EXT2, PRPS1, CAV2, CLCN3, ENPP1, SNX6, CSF1, ADH5, RRAGA, CALCOCO2, STUB1, MTMR2, MOAP1, RPL7, SH3GLB1, TAP2, PVRL2, NPM1…	2244	334	12983	1.43775	0.475458	0.011256	0.679711
	GOTERM_MF_FAT	GO:0015450~P-P-bond-hydrolysis-driven protein transmembrane transporter activity	9	0.306435	0.000442196	SEC61B, TOMM7, TIMM17A, TIMM17B, TOMM20, TIMM23, TIMM44, SEC61A1, SEC61G	2244	13	12983	4.00545	0.50327	0.0119915	0.73689
	GOTERM_MF_FAT	GO:0022884~macromolecule transmembrane transporter activity	9	0.306435	0.000442196	SEC61B, TOMM7, TIMM17A, TIMM17B, TOMM20, TIMM23, TIMM44, SEC61A1, SEC61G	2244	13	12983	4.00545	0.50327	0.0119915	0.73689
	GOTERM_MF_FAT	GO:0003697~single-stranded DNA binding	21	0.715015	0.000543182	RAD23B, HMGB2, CNBP, SSBP1, SUB1, RAD23A, HNRNPA2B1, TP53, MLH1, HNRNPA1, YBX1, RPA1, HNRPDL, FUBP1, LONP1, MCM7, PCBP1, HSPD1, LRPPRC, ERCC1, RBMS1	2244	55	12983	2.20907	0.576647	0.0142237	0.904459
	GOTERM_MF_FAT	GO:0008121~ubiquinol-cytochrome-c reductase activity	7	0.238338	0.000538113	UQCR10, UQCRC1, UQCR11, UQCRH, UQCRFS1, UQCRQ, UQCRB, UQCRHL	2244	8	12983	5.06244	0.573236	0.014329	0.896053
	GOTERM_MF_FAT	GO:0016681~oxidoreductase activity, acting on diphenols and related substances as donors, cytochrome as acceptor	7	0.238338	0.000538113	UQCR10, UQCRC1, UQCR11, UQCRH, UQCRFS1, UQCRQ, UQCRB, UQCRHL	2244	8	12983	5.06244	0.573236	0.014329	0.896053
	GOTERM_MF_FAT	GO:0003712~transcription cofactor activity	88	2.99625	0.000632181	ENY2, MMS19, COPS2, COPS5, TSG101, RBM4, PDLIM1, ANKRD1, HSBP1, MXI1, RLIM, RFXANK, RGL2, CTNNB1, CITED2, AIP, MAGED1, MAX, AES, PLRG1, SND1, GTF2A2, PQBP1, YAP1, SERTAD2, PSMD9, CUTA, TBL1XR1, BCL10, CTBP2, SP100, PCBD1, RAN, LDB1, MECP2, CDK7, HMGA1, JUNB, DDIT3, PRPF6, MXD4, TAF11, SMARCE1, PFDN6, ABT1, BTG1, NCOA4, MED17, PFDN5, TGIF1, EDF1, NFE2L1, USP22, NFE2L3, SUPT3H, EID1, ZNF274, TADA3,…	2244	363	12983	1.40258	0.632277	0.0162667	1.05192
	GOTERM_MF_FAT	GO:0016881~acid-amino acid ligase activity	54	1.83861	0.000738128	TMEM189-UBE2V1, TSG101, UBE2G1, PPCS, RLIM, GSS, UBE2A, ANAPC5, UBE2J1, UBE2I, UBR2, UBE2H, UBE2C, UBE2B, UBE2N, HUWE1, UBE2K, UBE2M, UBL4A, FBXL5, UBE2S, ZER1, UBE2T, UBE2V1, UBE2V2, ARPC4, ANAPC10, CDC34, UBE3C, ANAPC11, STUB1, RBX1, UBE2R2, SUMO3, SUMO2, UBE2D3, UBE2D2, FBXW2, TRAF7, NEDD4L, FBXW11, TRIP12, FBXO7, UBE2L6, UBE2L3, TSPAN17, RNF8, UBE2E3, NOSIP, UBA3, ZRANB1, SMURF2, PAICS, UBE2E…	2244	201	12983	1.55435	0.689058	0.0186647	1.22718
	GOTERM_MF_FAT	GO:0010860~proteasome regulator activity	6	0.20429	0.000787849	PSMF1, ADRM1, GPX1, PSME1, PSME2, PSME3	2244	6	12983	5.78565	0.712596	0.019597	1.30934
	GOTERM_MF_FAT	GO:0070035~purine NTP-dependent helicase activity	31	1.0555	0.00081816	XRCC5, SKIV2L, XRCC6, CETN2, DDX27, DDX17, DDX47, DDX46, DDX49, DDX3X, DDX24, DHX15, DHX16, DDX21, DHX30, DDX41, ERCC2, DHX9, G3BP1, DDX1, DDX5, DDX6, EIF4A3, DDX56, FBXO18, EIF4A2, EIF4A1, SNRNP200, GTF2F2, RUVBL2, DDX54	2244	98	12983	1.83015	0.726064	0.0197238	1.35939
	GOTERM_MF_FAT	GO:0008026~ATP-dependent helicase activity	31	1.0555	0.00081816	XRCC5, SKIV2L, XRCC6, CETN2, DDX27, DDX17, DDX47, DDX46, DDX49, DDX3X, DDX24, DHX15, DHX16, DDX21, DHX30, DDX41, ERCC2, DHX9, G3BP1, DDX1, DDX5, DDX6, EIF4A3, DDX56, FBXO18, EIF4A2, EIF4A1, SNRNP200, GTF2F2, RUVBL2, DDX54	2244	98	12983	1.83015	0.726064	0.0197238	1.35939
	GOTERM_MF_FAT	GO:0048037~cofactor binding	64	2.17909	0.000807763	LDHB, HMGCR, NDUFAB1, OGDH, UXS1, ACBD5, HIBADH, NDUFS7, ACOT7, TP53I3, ALAS1, IDH3G, CAT, NQO1, HADH, DUS1L, NDUFS2, NQO2, DHCR24, ALDH6A1, CTBP1, ACADM, PDXK, CTBP2, AIFM1, HMBS, GRHPR, ACADVL, NNT, DLD, TXNRD1, OAT, MDH1, HSD17B10, SORD, GLUD1, ADH5, HADHA, HADHB, FASN, IDH1, ILVBL, GALE, ERO1L, TSTA3, GAPDH, PDHX, ETFA, DLST, SHMT2, BIRC5, DLAT, DBI, SIRT2, IDH3A, SDHA, TXNDC12, PYGL, NDUFV1,…	2244	249	12983	1.48707	0.721517	0.0197768	1.34222
	GOTERM_MF_FAT	GO:0042625~ATPase activity, coupled to transmembrane movement of ions	25	0.851209	0.00108037	ATP5E, ATP6V0E1, ATP1B1, ATP6AP1, ATP5B, ATP6V1B2, ATP6V1G1, ATP5G1, ATP6V0B, ATP2B4, ATP5O, ATP5J, ATP5F1, ATP1A1, ATP13A3, ATP6V1D, ATP6V1F, ATP6V1C1, ATP6V1A, ATP2A2, ATP2C1, ATP6V1E1, ATP5C1, ATP5A1, ASNA1	2244	74	12983	1.95461	0.819146	0.0255773	1.79136
	GOTERM_MF_FAT	GO:0051536~iron-sulfur cluster binding	19	0.646919	0.00116023	ABCE1, ACO1, CDKAL1, UQCRFS1, RPS3, GLRX2, NDUFS7, SDHB, ISCU, CISD2, ISCA2, CISD1, NDUFV1, NARF, NDUFS8, NDUFV2, NDUFS2, NDUFS1, ERCC2	2244	50	12983	2.19855	0.840635	0.027039	1.92258
	GOTERM_MF_FAT	GO:0051540~metal cluster binding	19	0.646919	0.00116023	ABCE1, ACO1, CDKAL1, UQCRFS1, RPS3, GLRX2, NDUFS7, SDHB, ISCU, CISD2, ISCA2, CISD1, NDUFV1, NARF, NDUFS8, NDUFV2, NDUFS2, NDUFS1, ERCC2	2244	50	12983	2.19855	0.840635	0.027039	1.92258
	GOTERM_MF_FAT	GO:0016679~oxidoreductase activity, acting on diphenols and related substances as donors	7	0.238338	0.00137753	UQCR10, UQCRC1, UQCR11, UQCRH, UQCRFS1, UQCRQ, UQCRB, UQCRHL	2244	9	12983	4.49995	0.887044	0.0315611	2.27877
	GOTERM_MF_FAT	GO:0004812~aminoacyl-tRNA ligase activity	18	0.61287	0.00148465	CARS, YARS, DARS, NARS, SARS, AARS, GARS, EPRS, QARS, KARS, DTD1, IARS, WARS, TARS, RARS, HARS, TPR, MARS	2244	47	12983	2.21578	0.904674	0.0334909	2.45391
	GOTERM_MF_FAT	GO:0016876~ligase activity, forming aminoacyl-tRNA and related compounds	18	0.61287	0.00148465	CARS, YARS, DARS, NARS, SARS, AARS, GARS, EPRS, QARS, KARS, DTD1, IARS, WARS, TARS, RARS, HARS, TPR, MARS	2244	47	12983	2.21578	0.904674	0.0334909	2.45391
	GOTERM_MF_FAT	GO:0016875~ligase activity, forming carbon-oxygen bonds	18	0.61287	0.00148465	CARS, YARS, DARS, NARS, SARS, AARS, GARS, EPRS, QARS, KARS, DTD1, IARS, WARS, TARS, RARS, HARS, TPR, MARS	2244	47	12983	2.21578	0.904674	0.0334909	2.45391
	GOTERM_MF_FAT	GO:0016879~ligase activity, forming carbon-nitrogen bonds	59	2.00885	0.00154444	TMEM189-UBE2V1, TSG101, UBE2G1, PPCS, RLIM, MTHFD1, GSS, UBE2A, ANAPC5, NADSYN1, UBE2J1, UBE2I, UBR2, UBE2H, UBE2C, UBE2B, GMPS, UBE2N, GLUL, HUWE1, UBE2K, UBE2M, FBXL5, UBL4A, UBE2S, ZER1, UBE2T, ADSS, UBE2V1, UBE2V2, ARPC4, ANAPC10, CDC34, UBE3C, ANAPC11, STUB1, RBX1, UBE2R2, SUMO3, SUMO2, UBE2D3, UBE2D2, FBXW2, TRAF7, NEDD4L, FBXW11, TRIP12, FBXO7, UBE2L6, UBE2L3, TSPAN17, RNF8, UBE2E3, NOSIP,…	2244	231	12983	1.47772	0.913291	0.0343283	2.55155
	GOTERM_MF_FAT	GO:0019900~kinase binding	48	1.63432	0.00156862	GLRX3, CAV2, CAV1, PRKAG1, PDLIM5, HINT1, VIM, PGAM1, TRIB3, PRDX3, UBQLN1, PRKCSH, FTH1, CTNNB1, RPS3, SQSTM1, CDKN2C, CDKN2D, SLC2A1, PRKACA, CDK5RAP3, LSM2, TPRKB, TOP2A, DLG1, ADAM9, ACTB, BCL10, IRAK1, ADAM10, SP100, MAP2K1, PFKL, TGFBR2, SMAD3, BAD, PFKM, PPP1CC, IRS1, PPP1CB, STAT3, FLNA, MAPK1, SPAG9, CCND1, YWHAG, BTG1, PEBP1	2244	179	12983	1.55146	0.91655	0.0343742	2.591
	GOTERM_MF_FAT	GO:0008353~RNA polymerase II carboxy-terminal domain kinase activity	8	0.272387	0.00160261	CDK1, MNAT1, CCNH, GTF2H4, CDK9, GTF2H3, CDK7, ERCC2	2244	12	12983	3.8571	0.920926	0.0346274	2.64644
	GOTERM_MF_FAT	GO:0004842~ubiquitin-protein ligase activity	41	1.39598	0.00166392	UBE2G1, ANAPC10, CDC34, ANAPC11, UBE3C, RLIM, STUB1, UBE2R2, UBE2D3, UBE2D2, FBXW2, TRAF7, NEDD4L, FBXW11, TRIP12, FBXO7, UBE2A, ANAPC5, UBE2J1, UBE2L6, UBR2, UBE2H, UBE2L3, UBE2C, TSPAN17, UBE2B, UBE2N, RNF8, UBE2E3, NOSIP, HUWE1, UBE2K, UBE2M, FBXL5, ZRANB1, SMURF2, UBE2S, UBE2E2, UBE2T, ZER1, UBE2E1	2244	147	12983	1.61368	0.928246	0.0354457	2.74636
	GOTERM_MF_FAT	GO:0046982~protein heterodimerization activity	54	1.83861	0.00170225	VAPA, PDGFA, VAPB, ALG2, HEXA, HEXB, PPARG, BNIP3, SAE1, TPD52, RGL2, TGFB2, FOS, MAX, BAK1, GTF2A2, SUPT5H, TOP2A, EGFR, IRAK2, CUTA, IRAK1, PPP2R1A, CAPNS1, TP53, ADIPOR1, HIF1A, PFDN6, SDCBP, EXT1, EXT2, CLCN3, PANX1, MCL1, RRAGA, BCL2L1, ITGB1, PEF1, PPP2CA, TAP2, TAP1, NPM1, PPP2CB, ENO2, SUPT4H1, CEBPG, TGFBR2, ITGA2, BIRC5, FOXP1, BAX, UBA3, TRPC4AP, PPP2R4	2244	208	12983	1.50204	0.932474	0.0357669	2.80877
	GOTERM_MF_FAT	GO:0003713~transcription coactivator activity	55	1.87266	0.00195393	MMS19, ENY2, COPS5, TSG101, RBM4, PDLIM1, RGL2, CTNNB1, CITED2, AIP, MAGED1, MAX, GTF2A2, PQBP1, YAP1, PSMD9, SERTAD2, CUTA, BCL10, SP100, RAN, PCBD1, CDK7, HMGA1, JUNB, PRPF6, TAF11, SMARCE1, PFDN6, NCOA4, ABT1, MED17, EDF1, USP22, NFE2L3, SUPT3H, TADA3, CREM, FHL2, NPM1, SUPT7L, TAF9, APEX1, TFDP1, CREB3, SUB1, TAF7, SRA1, TRIM28, PMF1, ATF6, RNF4, PSMC3, GTF2F1, THRAP3	2244	214	12983	1.48697	0.954686	0.0398947	3.21771
	GOTERM_MF_FAT	GO:0008186~RNA-dependent ATPase activity	11	0.374532	0.00199402	EIF4A3, DHX9, DDX17, DDX47, DDX56, DDX3X, SKIV2L, DDX24, G3BP1, DDX21, DDX54	2244	22	12983	2.89283	0.957476	0.0401795	3.2827
	GOTERM_MF_FAT	GO:0045182~translation regulator activity	13	0.442629	0.00195377	PAIP2, PAIP1, RPS9, MRPL9, RPS27L, RPS14, MRPL18, CELF1, PABPC1, MRPL32, MRPL43, MRPL34, MRPL35	2244	29	12983	2.59357	0.954674	0.0404125	3.21745
	GOTERM_MF_FAT	GO:0051059~NF-kappaB binding	13	0.442629	0.00195377	BCL10, PPARD, MTDH, CFB, SKIV2L, CSNK2B, NFKBIA, CLIC1, RPS3, HDAC1, NPM1, COMMD7, DDAH2	2244	29	12983	2.59357	0.954674	0.0404125	3.21745
	GOTERM_MF_FAT	GO:0015631~tubulin binding	30	1.02145	0.00248873	ALDOA, RABGAP1, CNN3, VAPB, MLPH, GPAA1, NUMA1, SBDS, MACF1, SKA2, PAFAH1B1, EMD, GABARAPL2, KIF5B, MAP1B, SUN2, NUSAP1, BIRC5, GABARAP, UXT, NME2, NME1-NME2, NME1, FYN, CLIP1, ARL8A, ARL8B, STMN1, MAPRE1, PRNP, LRPPRC, DNM2	2244	100	12983	1.7357	0.980592	0.0492835	4.08129

## Sheet: C
GO of Exosomal Genes from Both Cell Lines (115 Genes)
Current Background: Homo sapiens
Category	Term	Count	%	PValue	Genes	List Total	Pop Hits	Pop Total	Fold Enrichment	Bonferroni	Benjamini	FDR
GOTERM_BP_FAT	GO:0006414~translational elongation	58	51.7857	5.04313e-101	RPL18, RPL17, RPL19, RPL13, RPL15, RPLP2, RPS2, RPS3, RPLP0, RPLP1, RPL10, RPL11, RPL12, RPS27A, RPL35A, RPS18, RPS19, RPL41, RPS16, RPS14, RPS15, RPS12, EEF1G, RPS10, RPS11, UBB, EEF1D, UBA52, RPL27A, RPL35, RPL37, RPL38, RPL39, RPL30, RPS28, RPL32, RPS29, RPL9, RPL34, RPL8, RPL3, RPL10A, RPS20, RPS21, RPS23, RPS24, EEF1A1, RPL26, RPS9, RPL24, RPS5, RPS8, RPL28, RPL29, RPL23, RPL18A, RPL13A, RPL…	104	101	13528	74.6976	2.89475e-98	2.89475e-98	7.40315e-98
GOTERM_BP_FAT	GO:0006412~translation	60	53.5714	4.27017e-69	RPL18, RPL17, RPL19, RPL13, RPL15, RPLP2, EIF5A, RPS2, RPS3, RPLP0, RPLP1, RPL10, RPL11, RPL12, RPS27A, RPL35A, RPS18, RPS19, RPL41, RPS16, RPS14, RPS15, EIF4A1, RPS12, EEF1G, RPS10, RPS11, UBB, EEF1D, UBA52, RPL27A, RPL35, RPL37, RPL38, RPL39, RPL30, RPS28, RPL32, RPS29, RPL9, RPL34, RPL8, RPL3, RPL10A, RPS20, RPS21, RPS23, RPS24, EEF1A1, RPL26, RPS9, RPL24, RPS5, RPS8, RPL28, RPL29, RPL23, RPL1…	104	331	13528	23.5789	2.45108e-66	1.22554e-66	6.26847e-66
GOTERM_BP_FAT	GO:0042274~ribosomal small subunit biogenesis	6	5.35714	1.03374e-08	RPS28, RPS19, RPS16, RPS14, RPS15, RPS24	104	11	13528	70.951	5.93362e-06	1.97788e-06	1.51749e-05
GOTERM_BP_FAT	GO:0042254~ribosome biogenesis	11	9.82143	2.85461e-08	RPL35A, RPS28, RPS19, RPS16, RPS14, RPLP0, RPS15, RPL26, RPL11, RPL24, RPS24	104	122	13528	11.7282	1.63853e-05	4.09636e-06	4.19048e-05
GOTERM_BP_FAT	GO:0022613~ribonucleoprotein complex biogenesis	12	10.7143	1.17619e-07	RPL35A, RPS28, RPS19, RPS16, RPS14, RPLP0, RPS15, RPL26, RPL11, RPL24, SNRPG, RPS24	104	180	13528	8.67179	6.75112e-05	1.35026e-05	0.000172661
GOTERM_BP_FAT	GO:0006364~rRNA processing	9	8.03571	4.71113e-07	RPL35A, RPS28, RPS19, RPS16, RPS14, RPS15, RPL26, RPL11, RPS24	104	92	13528	12.7249	0.000270383	4.50688e-05	0.000691577
GOTERM_BP_FAT	GO:0016072~rRNA metabolic process	9	8.03571	6.5455e-07	RPL35A, RPS28, RPS19, RPS16, RPS14, RPS15, RPL26, RPL11, RPS24	104	96	13528	12.1947	0.000375641	5.36717e-05	0.000960855
GOTERM_BP_FAT	GO:0042273~ribosomal large subunit biogenesis	4	3.57143	4.94819e-05	RPL35A, RPL26, RPL11, RPL24	104	10	13528	52.0308	0.0280037	0.00354412	0.0726133
GOTERM_BP_FAT	GO:0034470~ncRNA processing	9	8.03571	8.90663e-05	RPL35A, RPS28, RPS19, RPS16, RPS14, RPS15, RPL26, RPL11, RPS24	104	187	13528	6.26039	0.0498414	0.0056646	0.130667
GOTERM_BP_FAT	GO:0034660~ncRNA metabolic process	9	8.03571	0.000367109	RPL35A, RPS28, RPS19, RPS16, RPS14, RPS15, RPL26, RPL11, RPS24	104	230	13528	5.08997	0.190031	0.0189776	0.537554
GOTERM_BP_FAT	GO:0006396~RNA processing	13	11.6071	0.000905679	RPL35A, RPL26, SF3B5, HNRNPA1, RPS19, RPS28, RPS16, RPS14, RPS15, RPL11, RPL10A, RPS24, SNRPG	104	547	13528	3.09141	0.405536	0.0364681	1.3213
GOTERM_MF_FAT	GO:0003735~structural constituent of ribosome	54	48.2143	4.58125e-75	RPL18, RPL17, RPL19, RPL13, RPL15, RPLP2, RPS2, RPS3, RPLP0, RPLP1, RPL10, RPL11, RPL12, RPS27A, RPL35A, RPS18, RPS19, RPL41, RPS16, RPS14, RPS15, RPS12, RPS11, UBB, UBA52, RPL27A, RPL35, RPL37, RPL38, RPL39, RPL30, RPS28, RPL32, RPS29, RPL9, RPL34, RPL8, RPL3, RPL10A, RPS20, RPS21, RPS23, RPS24, RPL26, RPS9, RPL24, RPS5, RPS8, RPL28, RPL29, RPL18A, RPL23, RPL13A, RPL37A	104	168	12983	40.126	7.00931e-73	7.00931e-73	5.48951e-72
GOTERM_MF_FAT	GO:0005198~structural molecule activity	61	54.4643	3.75356e-52	RPL18, RPL17, RPL19, RPL13, RPL15, RPLP2, RPS2, RPS3, ACTG1, RPLP0, RPLP1, RPL10, RPL11, RPL12, RPS27A, RPL35A, RPS18, RPS19, RPL41, RPS16, RPS14, RPS15, RPS12, RPS11, UBB, UBA52, COPE, MYL6, VIM, RPL27A, RPL35, RPL37, RPL38, RPL39, TPM4, RPL30, TUBB, RPS28, RPL32, RPS29, RPL9, RPL34, RPL8, RPL3, RPL10A, RPS20, RPS21, RPS23, RPS24, ACTB, RPL26, RPS9, RPL24, RPS5, RPS8, RPL28, RPL29, RPL23, RPL18A…	104	634	12983	12.0111	5.74294e-50	2.87147e-50	4.49772e-49
GOTERM_MF_FAT	GO:0003723~RNA binding	42	37.5	3.14644e-25	RPL18, SRP14, RPL19, RPL13, RPL15, RPL27A, RPL35, EIF5A, RPLP2, RPL37, RPL38, RPL39, RPS2, RPS3, RPL30, RPL9, RPL34, RPLP0, RPLP1, RPL8, RPL3, RPL11, RPL12, RPL10A, RPS20, RPL35A, RPL26, RPS9, RPL24, RPS5, HNRNPA1, RPL28, RPL29, RPS18, RPS19, RPL18A, RPS16, RPL41, RPS14, EIF4A1, RPS11, SNRPG	104	718	12983	7.30242	4.81405e-23	1.60468e-23	3.77024e-22
GOTERM_MF_FAT	GO:0019843~rRNA binding	7	6.25	8.81919e-08	RPS18, RPL9, RPL8, RPS9, RPL37, RPL11, RPS11	104	29	12983	30.133	1.34933e-05	3.37333e-06	0.000105676
GOTERM_MF_FAT	GO:0003746~translation elongation factor activity	5	4.46429	3.51368e-05	EEF1A1, TCEB2, EEF1G, EIF5A, EEF1D	104	24	12983	26.0076	0.0053616	0.00107463	0.0420948
GOTERM_MF_FAT	GO:0008135~translation factor activity, nucleic acid binding	6	5.35714	0.00107966	EEF1A1, EIF4A1, TCEB2, EEF1G, EIF5A, EEF1D	104	98	12983	7.64305	0.152342	0.0271703	1.28607
GOTERM_MF_FAT	GO:0003729~mRNA binding	5	4.46429	0.00184681	RPS14, EIF4A1, RPL35, RPS5, RPS3	104	66	12983	9.45731	0.246347	0.039598	2.19065

## Sheet: D
Top 115 genes MDA-MB-231 Cellular Genes
Current Background: Homo sapiens
Category	Term	Count	%	PValue	Genes	List Total	Pop Hits	Pop Total	Fold Enrichment	Bonferroni	Benjamini	FDR
GOTERM_BP_FAT	GO:0006414~translational elongation	61	57.0093	1.74765e-108	RPL18, RPL17, RPL36A, RPL19, RPL13, RPLP2, RPS2, RPS3, RPS3A, RPLP0, RPLP1, RPL10, RPL11, RPL12, RPL35A, EEF2, RPS4X, RPS18, RPS16, RPS14, RPS15, RPS12, EEF1G, RPS11, UBB, RPL27A, RPL35, RPL36, RPL37, RPS25, RPS27, RPS28, RPL7, RPL31, RPL9, RPL8, RPL3, RPL5, RPL10A, RPL7A, RPL4, RPS20, RPS21, RPS23, RPS24, EEF1A1, RPL26, RPL27, RPL23A, RPL24, RPS6, RPS5, RPS8, RPL28, RPL29, RPS7, RPL23, RPL18A, R…	105	101	13528	77.8131	1.3352e-105	1.3352e-105	2.66641e-105
GOTERM_BP_FAT	GO:0006412~translation	62	57.9439	2.22852e-72	RPL18, RPL17, RPL36A, RPL19, RPL13, RPLP2, RPS2, RPS3, RPS3A, RPLP0, RPLP1, RPL10, RPL11, RPL12, RPL35A, EEF2, RPS4X, RPS18, RPS16, RPS14, RPS15, EIF4A1, RPS12, EEF1G, RPS11, UBB, RPL27A, RPL35, RPL36, RPL37, RPS25, RPS27, RPS28, RPL7, RPL31, RPL9, RPL8, RPL3, RPL5, RPL10A, RPL7A, RPL4, RPS20, RPS21, RPS23, RPS24, EEF1A1, RPL26, RPL27, RPL23A, RPL24, RPS6, RPS5, RPS8, RPL28, RPL29, RPS7, RPL23, R…	105	331	13528	24.1328	1.70259e-69	8.51294e-70	3.40009e-69
GOTERM_BP_FAT	GO:0042254~ribosome biogenesis	16	14.9533	2.14659e-14	RPL35A, RPL26, RPL24, RPS6, RPS7, RPS28, RPL7, RPS16, RPLP0, RPS14, RPS15, NPM1, RPL5, RPL11, RPL7A, RPS24	105	122	13528	16.8968	1.63705e-11	5.45686e-12	3.26961e-11
GOTERM_BP_FAT	GO:0042274~ribosomal small subunit biogenesis	8	7.47664	4.16219e-13	RPS28, RPS16, RPS14, RPS15, NPM1, RPS6, RPS7, RPS24	105	11	13528	93.7004	3.17994e-10	7.94985e-11	6.35036e-10
GOTERM_BP_FAT	GO:0022613~ribonucleoprotein complex biogenesis	16	14.9533	6.86556e-12	RPL35A, RPL26, RPL24, RPS6, RPS7, RPS28, RPL7, RPS16, RPLP0, RPS14, RPS15, NPM1, RPL5, RPL11, RPL7A, RPS24	105	180	13528	11.4523	5.24533e-09	1.04907e-09	1.0475e-08
GOTERM_BP_FAT	GO:0042273~ribosomal large subunit biogenesis	7	6.54206	3.65513e-11	RPL35A, RPL7, NPM1, RPL26, RPL5, RPL11, RPL24	105	10	13528	90.1867	2.79252e-08	4.6542e-09	5.57669e-08
GOTERM_BP_FAT	GO:0006364~rRNA processing	12	11.215	1.03603e-10	RPL35A, RPS28, RPS16, RPL7, RPS14, RPS15, RPL26, RPL5, RPL11, RPS6, RPS7, RPS24	105	92	13528	16.805	7.9153e-08	1.13076e-08	1.58069e-07
GOTERM_BP_FAT	GO:0016072~rRNA metabolic process	12	11.215	1.65721e-10	RPL35A, RPS28, RPS16, RPL7, RPS14, RPS15, RPL26, RPL5, RPL11, RPS6, RPS7, RPS24	105	96	13528	16.1048	1.26611e-07	1.58264e-08	2.52844e-07
GOTERM_BP_FAT	GO:0034470~ncRNA processing	12	11.215	1.91495e-07	RPL35A, RPS28, RPS16, RPL7, RPS14, RPS15, RPL26, RPL5, RPL11, RPS6, RPS7, RPS24	105	187	13528	8.26769	0.000146292	1.62557e-05	0.000292167
GOTERM_BP_FAT	GO:0034660~ncRNA metabolic process	12	11.215	1.50326e-06	RPL35A, RPS28, RPS16, RPL7, RPS14, RPS15, RPL26, RPL5, RPL11, RPS6, RPS7, RPS24	105	230	13528	6.72199	0.00114783	0.000114842	0.00229352
GOTERM_BP_FAT	GO:0034622~cellular macromolecular complex assembly	13	12.1495	5.77813e-06	HIST1H2AC, HIST1H1E, HIST1H2BC, HSP90AA1, HIST1H1C, RPL24, CALR, TUBB, HIST1H4B, RPS14, RPS15, NPM1, HIST1H3B, HIST1H3C, HIST1H4C	105	318	13528	5.26697	0.00440477	0.000401238	0.00881542
GOTERM_BP_FAT	GO:0034621~cellular macromolecular complex subunit organization	13	12.1495	1.84991e-05	HIST1H2AC, HIST1H1E, HIST1H2BC, HSP90AA1, HIST1H1C, RPL24, CALR, TUBB, HIST1H4B, RPS14, RPS15, NPM1, HIST1H3B, HIST1H3C, HIST1H4C	105	357	13528	4.69158	0.014034	0.00117709	0.0282206
GOTERM_BP_FAT	GO:0006334~nucleosome assembly	7	6.54206	4.46716e-05	HIST1H2AC, HIST1H2BC, HIST1H1E, HIST1H1C, HIST1H4B, NPM1, HIST1H3B, HIST1H3C, HIST1H4C	105	84	13528	10.7365	0.033554	0.00262193	0.0681345
GOTERM_BP_FAT	GO:0031497~chromatin assembly	7	6.54206	5.44746e-05	HIST1H2AC, HIST1H2BC, HIST1H1E, HIST1H1C, HIST1H4B, NPM1, HIST1H3B, HIST1H3C, HIST1H4C	105	87	13528	10.3663	0.0407655	0.0027708	0.0830806
GOTERM_BP_FAT	GO:0065004~protein-DNA complex assembly	7	6.54206	7.01458e-05	HIST1H2AC, HIST1H2BC, HIST1H1E, HIST1H1C, HIST1H4B, NPM1, HIST1H3B, HIST1H3C, HIST1H4C	105	91	13528	9.91062	0.0521824	0.00334397	0.106969
GOTERM_BP_FAT	GO:0034728~nucleosome organization	7	6.54206	7.92275e-05	HIST1H2AC, HIST1H2BC, HIST1H1E, HIST1H1C, HIST1H4B, NPM1, HIST1H3B, HIST1H3C, HIST1H4C	105	93	13528	9.69749	0.0587366	0.00355439	0.120811
GOTERM_BP_FAT	GO:0006396~RNA processing	14	13.0841	0.0002811	RPL35A, RPL36A, RPL26, RPS6, RPS7, RPS28, RPL7, RPS16, RPS14, RPS15, RPL11, RPL5, RPL10A, RPS24	105	547	13528	3.2975	0.193289	0.0106821	0.42802
GOTERM_BP_FAT	GO:0006323~DNA packaging	7	6.54206	0.000280236	HIST1H2AC, HIST1H2BC, HIST1H1E, HIST1H1C, HIST1H4B, NPM1, HIST1H3B, HIST1H3C, HIST1H4C	105	117	13528	7.70826	0.192757	0.0112067	0.426707
GOTERM_BP_FAT	GO:0042981~regulation of apoptosis	17	15.8879	0.000403789	TXNIP, LGALS1, RPS6, CALR, YWHAE, RPS3, TUBB, HSP90B1, CD44, RPS3A, NPM1, CFL1, TPT1, RPL11, UBB, HSPA5, PHLDA1	105	804	13528	2.72419	0.265494	0.0145858	0.614298
GOTERM_BP_FAT	GO:0010941~regulation of cell death	17	15.8879	0.000468965	TXNIP, LGALS1, RPS6, CALR, YWHAE, RPS3, TUBB, HSP90B1, CD44, RPS3A, NPM1, CFL1, TPT1, RPL11, UBB, HSPA5, PHLDA1	105	815	13528	2.68742	0.301188	0.0148213	0.71312
GOTERM_BP_FAT	GO:0043067~regulation of programmed cell death	17	15.8879	0.000450347	TXNIP, LGALS1, RPS6, CALR, YWHAE, RPS3, TUBB, HSP90B1, CD44, RPS3A, NPM1, CFL1, TPT1, RPL11, UBB, HSPA5, PHLDA1	105	812	13528	2.69735	0.291172	0.0148513	0.6849
GOTERM_BP_FAT	GO:0006333~chromatin assembly or disassembly	7	6.54206	0.000435441	HIST1H2AC, HIST1H2BC, HIST1H1E, HIST1H1C, HIST1H4B, NPM1, HIST1H3B, HIST1H3C, HIST1H4C	105	127	13528	7.10131	0.28305	0.0150112	0.662301
GOTERM_MF_FAT	GO:0003735~structural constituent of ribosome	57	53.271	4.95291e-81	RPL18, RPL17, RPL36A, RPL19, RPL13, RPLP2, RPS2, RPS3, RPS3A, RPLP0, RPLP1, RPL10, RPL11, RPL12, RPL35A, RPS4X, RPS18, RPS16, RPS14, RPS15, RPS12, RPS11, UBB, RPL27A, RPL35, RPL36, RPL37, RPS27, RPS28, RPL7, RPL31, RPL9, RPL8, RPL3, RPL5, RPL10A, RPL7A, RPL4, RPS20, RPS21, RPS23, RPS24, RPL26, RPL27, RPL23A, RPL24, RPS6, RPS5, RPS8, RPL28, RPL29, RPS7, RPL23, RPL18A, RPL13A, RPL21, RPL37A	105	168	12983	41.9519	9.16288e-79	9.16288e-79	6.12864e-78
GOTERM_MF_FAT	GO:0005198~structural molecule activity	61	57.0093	8.47666e-52	RPL18, RPL17, RPL36A, RPL19, RPL13, RPLP2, RPS2, RPS3, RPS3A, RPLP0, RPLP1, RPL10, RPL11, RPL12, RPL35A, RPS4X, RPS18, KRT19, RPS16, RPS14, RPS15, RPS12, RPS11, UBB, MYL6, VIM, RPL27A, RPL35, RPL36, RPL37, RPS27, TUBB, RPS28, RPL7, RPL31, RPL9, RPL8, RPL3, RPL5, RPL10A, RPL7A, RPL4, RPS20, RPS21, RPS23, RPS24, RPL26, RPL27, RPL23A, RPL24, RPS6, RPS5, RPS8, RPL28, RPL29, RPS7, RPL23, RPL18A, RPL13…	105	634	12983	11.8967	1.56818e-49	7.84091e-50	1.04889e-48
GOTERM_MF_FAT	GO:0003723~RNA binding	45	42.0561	2.50777e-28	RPL18, RPL36A, RPL19, RPL13, RPL27A, RPL35, RPLP2, RPL37, CALR, RPS2, RPS3, RPS25, RPL7, RPL31, RPS3A, RPL9, RPLP0, RPLP1, NPM1, RPL8, RPL3, RPL5, RPL11, RPL12, RPL7A, RPL10A, RPS20, RPL4, RPL35A, RPL26, RPL23A, RPL24, RPS4X, RPS5, RPL28, RPL29, RPS7, RPS18, HSP90B1, RPL18A, RPS16, RPS14, RPL21, EIF4A1, RPS11	105	718	12983	7.7495	4.63937e-26	1.54646e-26	3.10307e-25
GOTERM_MF_FAT	GO:0019843~rRNA binding	10	9.34579	8.37021e-13	RPS18, RPL9, RPL8, NPM1, RPL37, RPL5, RPL11, RPL23A, RPS11, RPS4X	105	29	12983	42.6371	1.54844e-10	3.87111e-11	1.03568e-09
GOTERM_MF_FAT	GO:0003729~mRNA binding	7	6.54206	1.40666e-05	RPL7, RPS14, EIF4A1, RPL35, CALR, RPS5, RPS3	105	66	12983	13.1141	0.00259895	0.000520332	0.0174044
GOTERM_MF_FAT	GO:0051082~unfolded protein binding	7	6.54206	0.000317549	HSP90B1, HSP90AA1, PPIA, NPM1, HSPA5, CALR, HSPA8	105	115	12983	7.52638	0.0570631	0.00974485	0.392221
